# Supplementary material for: Synthetic transformation of 1,3-diarylisobenzofuran-DMAD adducts: a facile preparation of tri-substituted α-naphthols
Source: Royal Society of Chemistry journal article supplement (doi:10.1039/c6ob00628k), 2016-01-01

# **Synthetic Transformation of 1,3- Diarylisobenzofuran-DMAD Adducts: A Facile Preparation of Tri-substituted $\alpha$ -Naphthols**

*Jayachandran Karunakaran, Meganathan Nandakumar, Natarajan Senthil  
Kumar and Arasambattu K Mohanakrishnan\**

Department of Organic Chemistry, University of Madras, Chennai, Tamil Nadu  
India 600 025

E-mail: [mohanakrishnan@unom.ac.in](mailto:mohanakrishnan@unom.ac.in), [mohan\\_67@hotmail.com](mailto:mohan_67@hotmail.com)

## **Supporting Information**

## Contents:

|                                                                                                                  |         |
|------------------------------------------------------------------------------------------------------------------|---------|
| 1. NMR spectra .....                                                                                             | 3-120   |
| 2. X-Ray Structure & Crystallographic data of <b>3e</b> , <b>9d</b> , <b>9g</b> , <b>9h</b> and <b>10b</b> ..... | 121-160 |
| 3. Absorption, emission spectra of <b>13i</b> , <b>13k</b> , <b>13l</b> and <b>13m</b> .....                     | 161     |

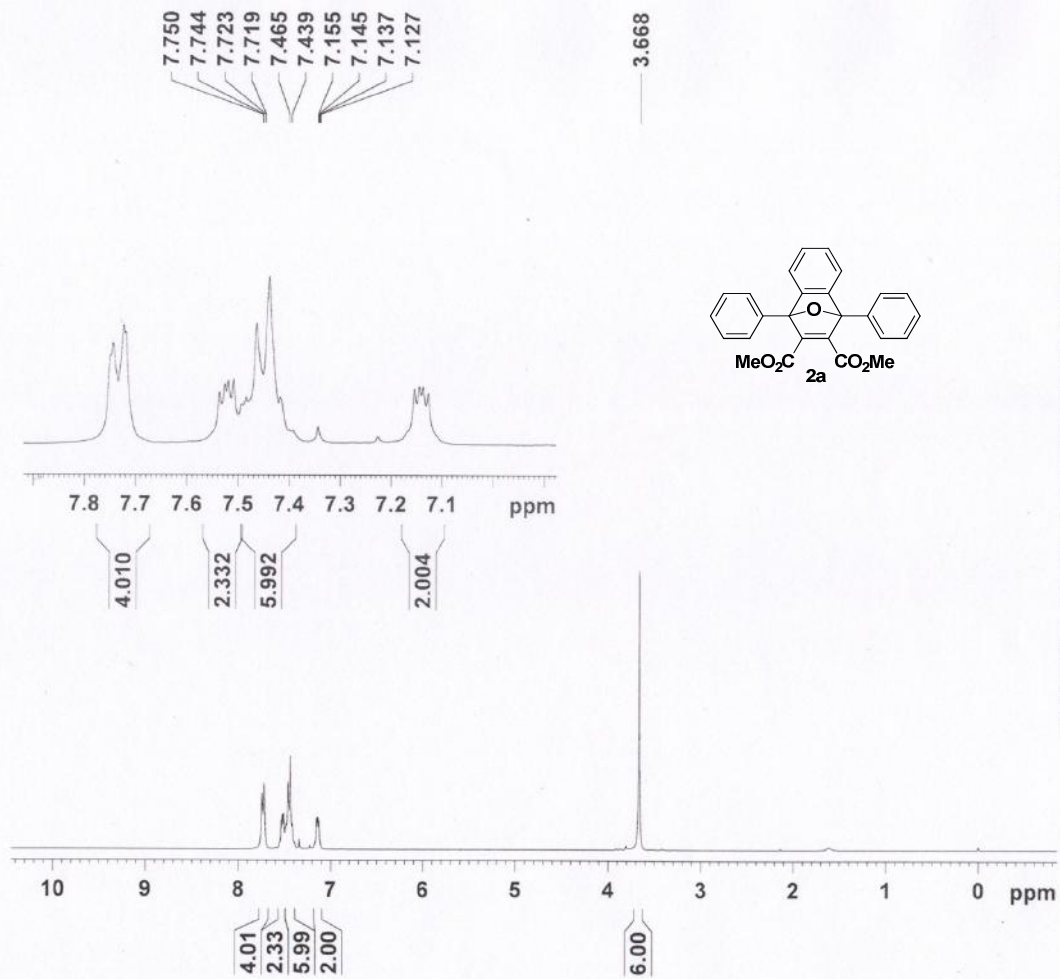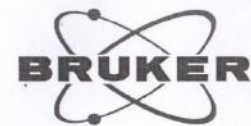

Current Data Parameters  
 NAME SK-MN-PDA  
 EXPNO 1  
 PROCNO 1

F2 - Acquisition Parameters  
 Date\_ 20100701  
 Time 12.56  
 INSTRUM spect  
 PROBHD 5 mm DUL 13C-1  
 PULPROG zg30  
 TD 65536  
 SOLVENT CDCl3  
 NS 16  
 DS 2  
 SWH 6172.839 Hz  
 FIDRES 0.094190 Hz  
 AQ 5.3084660 sec  
 RG 64  
 DW 81.000 usec  
 DE 6.00 usec  
 TE 300.0 K  
 D1 1.0000000 sec  
 TD0 1

==== CHANNEL f1 =====  
 NUC1 1H  
 P1 13.15 usec  
 PL1 0.00 dB  
 SFO1 300.1318534 MHz

F2 - Processing parameters  
 SI 32768  
 SF 300.1300165 MHz  
 WDW EM  
 SSB 0  
 LB 0.30 Hz  
 GB 0  
 PC 1.00

<sup>1</sup>H-NMR Spectra of Compound 2a

UNIV. OF MADRAS

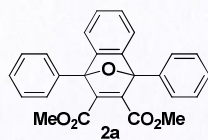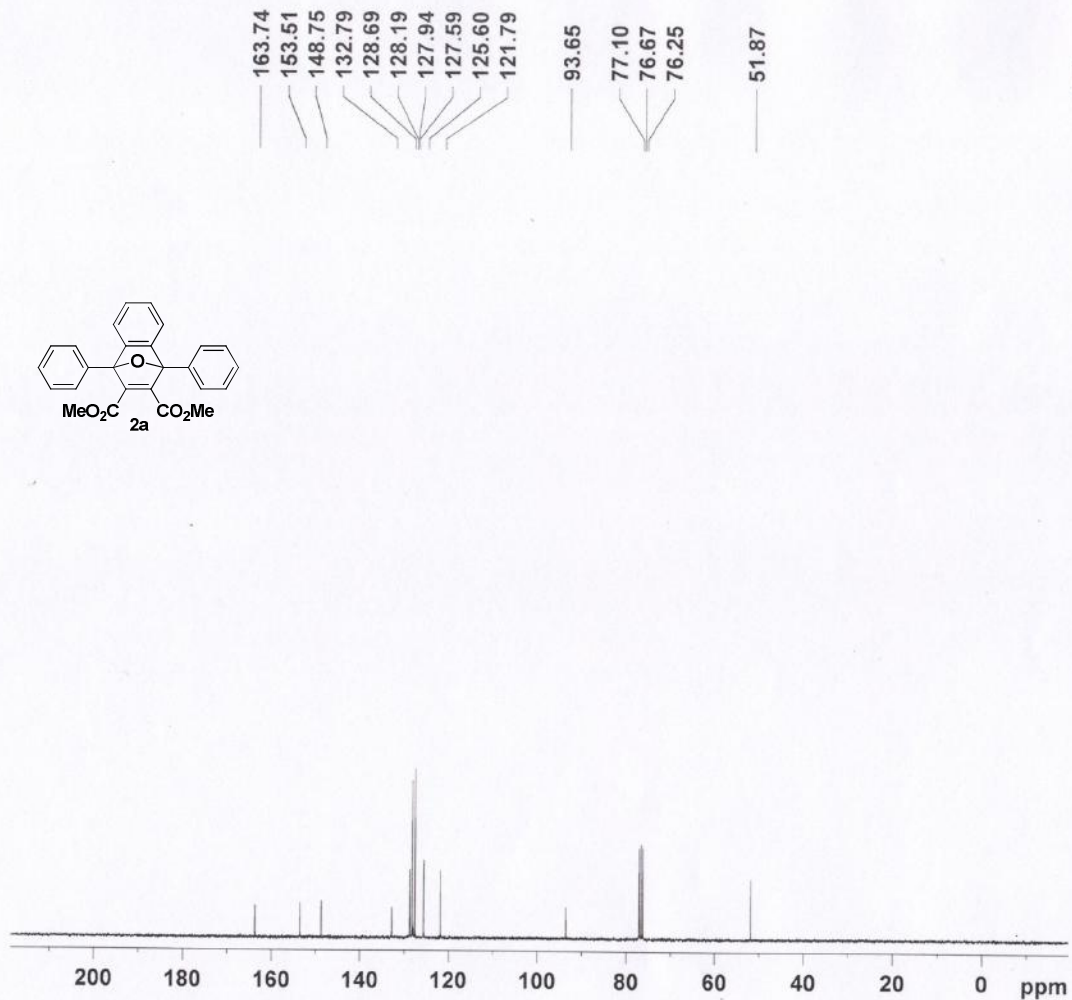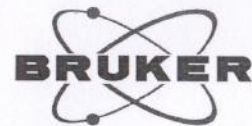

Current Data Parameters  
NAME SK-MN-PDA  
EXPNO 2  
PROCNO 1

F2 - Acquisition Parameters  
Date\_ 20100701  
Time 12.59  
INSTRUM spect  
PROBHD 5 mm DUL 13C-1  
PULPROG zgpg30  
TD 65536  
SOLVENT CDCl3  
NS 107  
DS 4  
SWH 17985.611 Hz  
FIDRES 0.274439 Hz  
AQ 1.8219508 sec  
RG 574.7  
DW 27.800 usec  
DE 6.00 usec  
TE 300.0 K  
D1 2.0000000 sec  
d11 0.0300000 sec  
DELTA 1.89999998 sec  
TD0 1

===== CHANNEL f1 =====  
NUC1 13C  
P1 7.40 usec  
PL1 -2.00 dB  
SFO1 75.4752953 MHz

===== CHANNEL f2 =====  
CPDPRG2 waltz16  
NUC2 1H  
PCPD2 80.00 usec  
PL2 0.00 dB  
PL12 15.68 dB  
PL13 16.00 dB  
SFO2 300.1312005 MHz

F2 - Processing parameters  
SI 32768  
SF 75.4677810 MHz  
WDW EM  
SSB 0  
LB 1.00 Hz

<sup>13</sup>C-NMR Spectra of Compound 2a



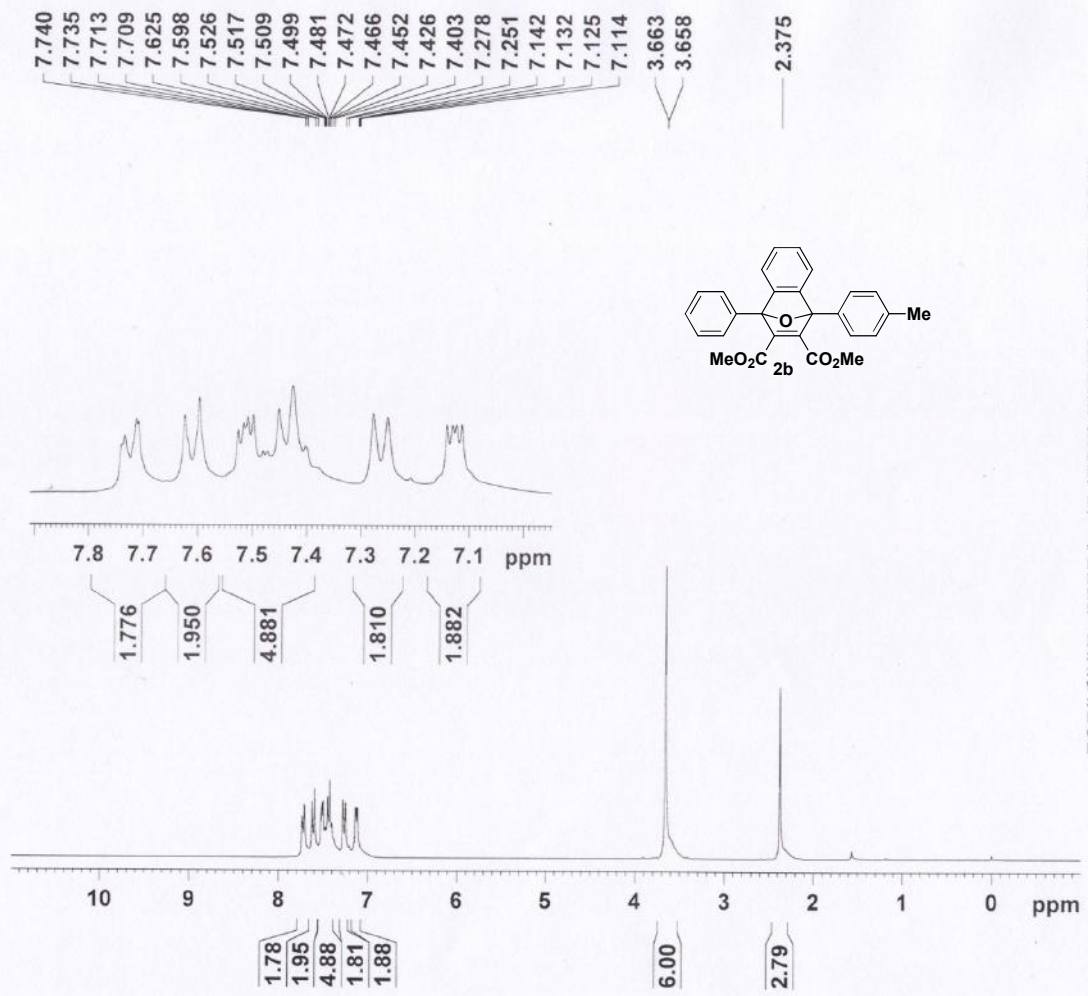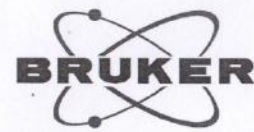

Current Data Parameters  
 NAME SK-MM-PTA8  
 EXPNO 1  
 PROCNO 1

F2 - Acquisition Parameters  
 Date\_ 20100731  
 Time 14.56  
 INSTRUM spect  
 PROBHD 5 mm DUL 13C-1  
 PULPROG zg30  
 TD 65536  
 SOLVENT CDCl3  
 NS 20  
 DS 2  
 SWH 6172.839 Hz  
 FIDRES 0.094190 Hz  
 AQ 5.3084660 sec  
 RG 40.3  
 DW 81.000 usec  
 DE 6.00 usec  
 TE 300.0 K  
 D1 1.00000000 sec  
 TD0 1

===== CHANNEL f1 =====  
 NUC1 1H  
 P1 13.15 usec  
 PL1 0.00 dB  
 SFO1 300.1318534 MHz

F2 - Processing parameters  
 SI 32768  
 SF 300.1300218 MHz  
 WDW EM  
 SSB 0  
 LB 0.30 Hz  
 GB 0  
 PC 1.00

<sup>1</sup>H-NMR Spectra of Compound 2b

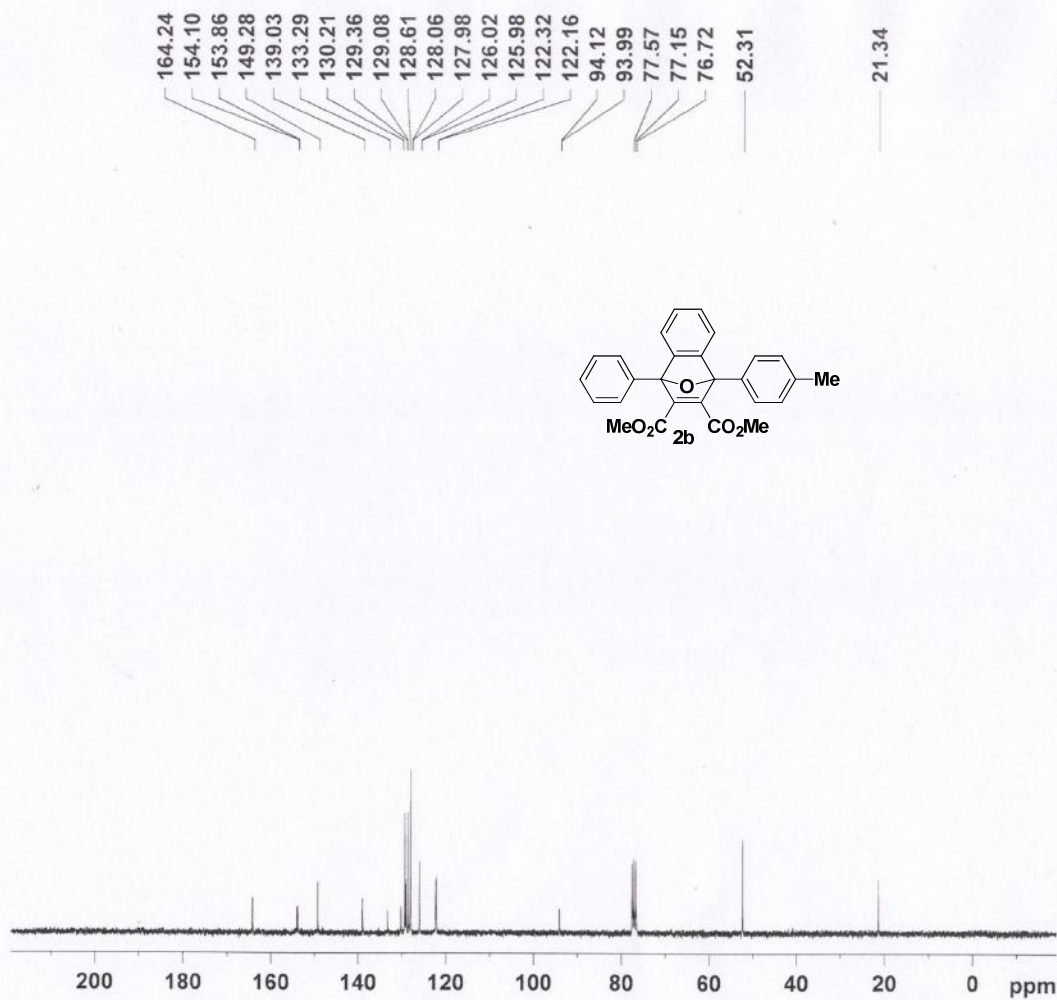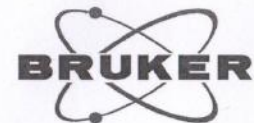

Current Data Parameters  
NAME SK-MM-PTA8  
EXPNO 2  
PROCNO 1

F2 - Acquisition Parameters  
Date\_ 20100731  
Time 15.03  
INSTRUM spect  
PROBHD 5 mm DUL 13C-1  
PULPROG zgpg30  
TD 65536  
SOLVENT CDCl<sub>3</sub>  
NS 113  
DS 4  
SWH 17985.611 Hz  
FIDRES 0.274439 Hz  
AQ 1.8219508 sec  
RG 362  
DW 27.800 usec  
DE 6.00 usec  
TE 300.0 K  
D1 2.00000000 sec  
d11 0.03000000 sec  
DELTA 1.89999998 sec  
TD0 1

===== CHANNEL f1 =====  
NUC1 13C  
P1 7.40 usec  
PL1 -2.00 dB  
SFO1 75.4752953 MHz

===== CHANNEL f2 =====  
CPDPRG2 waltz16  
NUC2 1H  
PCPD2 80.00 usec  
PL2 0.00 dB  
PL12 15.68 dB  
PL13 16.00 dB  
SFO2 300.1312005 MHz

F2 - Processing parameters  
SI 32768  
SF 75.4677490 MHz  
WDW EM  
SSB 0  
LB 1.00 Hz

<sup>13</sup>C-NMR Spectra of Compound 2b

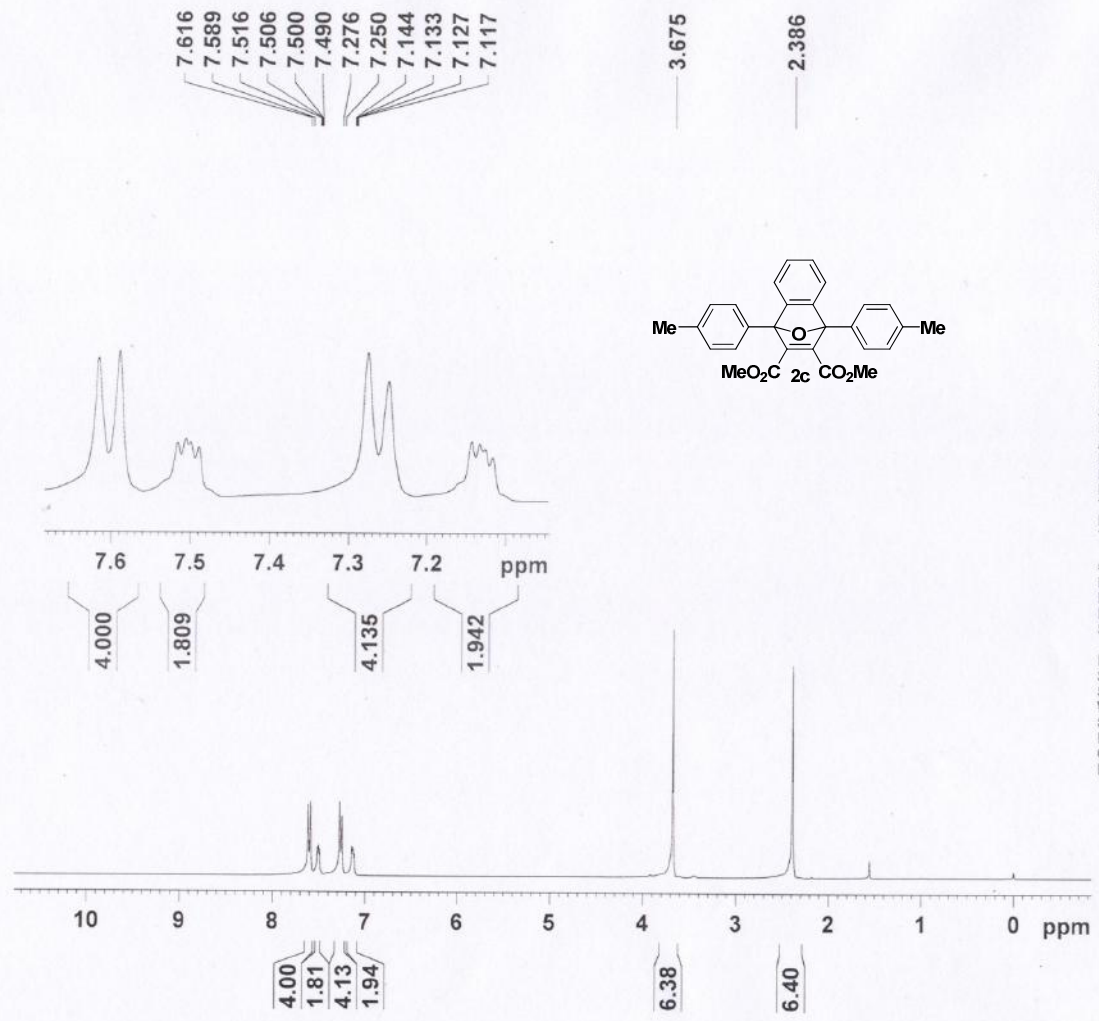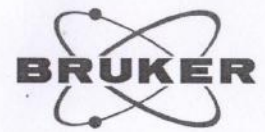

Current Data Parameters  
 NAME MM-TTA-12  
 EXPNO 1  
 PROCNO 1

F2 - Acquisition Parameters  
 Date\_ 20100805  
 Time 10.32  
 INSTRUM spect  
 PROBHD 5 mm DUL 13C-1  
 PULPROG zg30  
 TD 65536  
 SOLVENT CDCl3  
 NS 6  
 DS 2  
 SWH 6172.839 Hz  
 FIDRES 0.094190 Hz  
 AQ 5.3084660 sec  
 RG 90.5  
 DW 81.000 usec  
 DE 6.00 usec  
 TE 300.0 K  
 D1 1.00000000 sec  
 TD0 1

===== CHANNEL f1 =====  
 NUC1 1H  
 P1 13.15 usec  
 PL1 0.00 dB  
 SFO1 300.1318534 MHz

F2 - Processing parameters  
 SI 32768  
 SF 300.1300124 MHz  
 WDW EM  
 SSB 0  
 LB 0.30 Hz  
 GB 0  
 PC 1.00

<sup>1</sup>H-NMR Spectra of Compound 2c

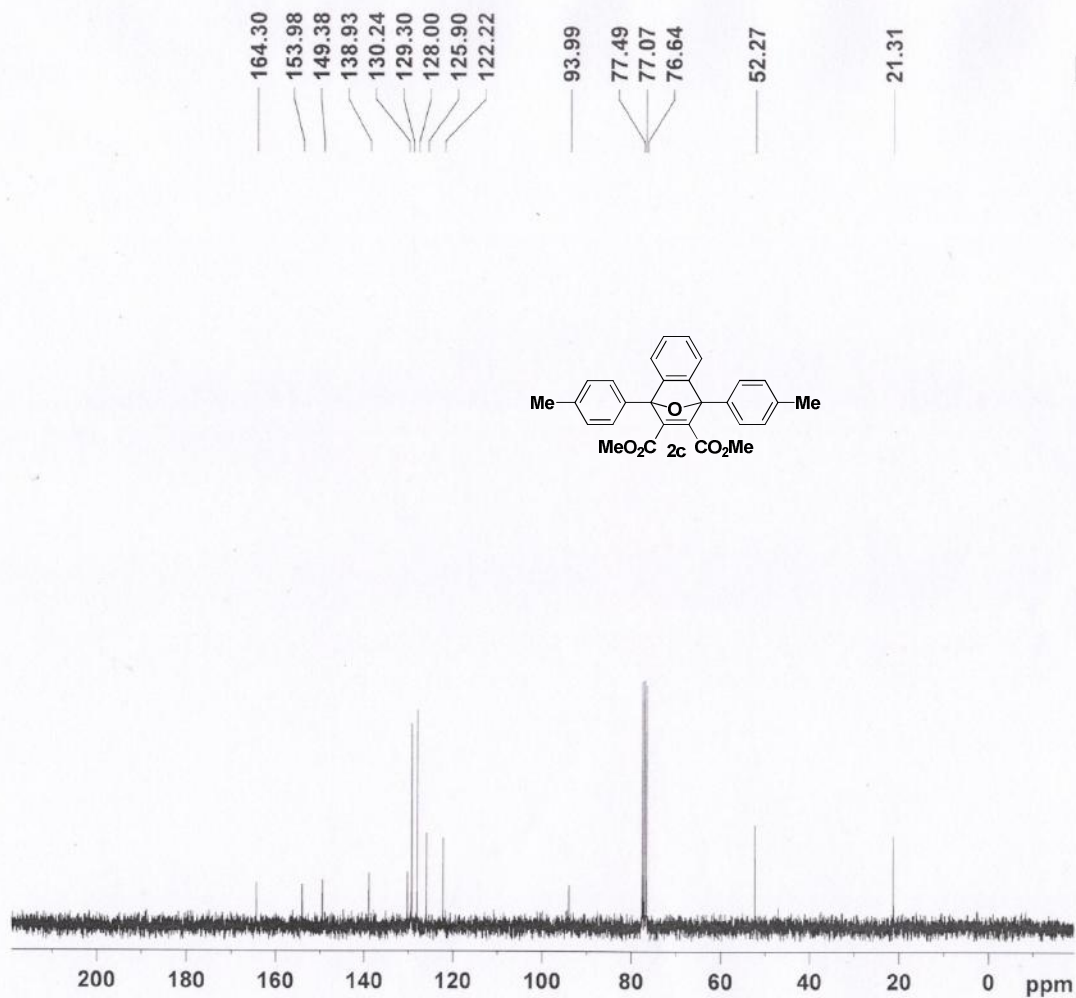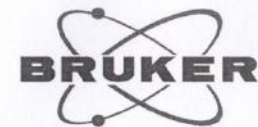

Current Data Parameters  
 NAME MM-TTA-12  
 EXPNO 2  
 PROCNO 1

F2 - Acquisition Parameters  
 Date 20100805  
 Time 10.34  
 INSTRUM spect  
 PROBHD 5 mm DUL 13C-1  
 PULPROG zgpg30  
 TD 65536  
 SOLVENT CDCl3  
 NS 15  
 DS 4  
 SWH 17985.611 Hz  
 FIDRES 0.274439 Hz  
 AQ 1.8219508 sec  
 RG 362  
 DW 27.800 usec  
 DE 6.00 usec  
 TE 300.0 K  
 D1 2.00000000 sec  
 d11 0.03000000 sec  
 DELTA 1.89999998 sec  
 TDO 1

===== CHANNEL f1 =====  
 NUC1 13C  
 P1 7.40 usec  
 PL1 -2.00 dB  
 SFO1 75.4752953 MHz

===== CHANNEL f2 =====  
 CPDPRG2 waltz16  
 NUC2 1H  
 PCPD2 80.00 usec  
 PL2 0.00 dB  
 PL12 15.68 dB  
 PL13 16.00 dB  
 SFO2 300.1312005 MHz

F2 - Processing parameters  
 SI 32768  
 SF 75.4677490 MHz  
 WDW EM  
 SSB 0  
 LB 1.00 Hz

<sup>13</sup>C-NMR Spectra of Compound **2c**

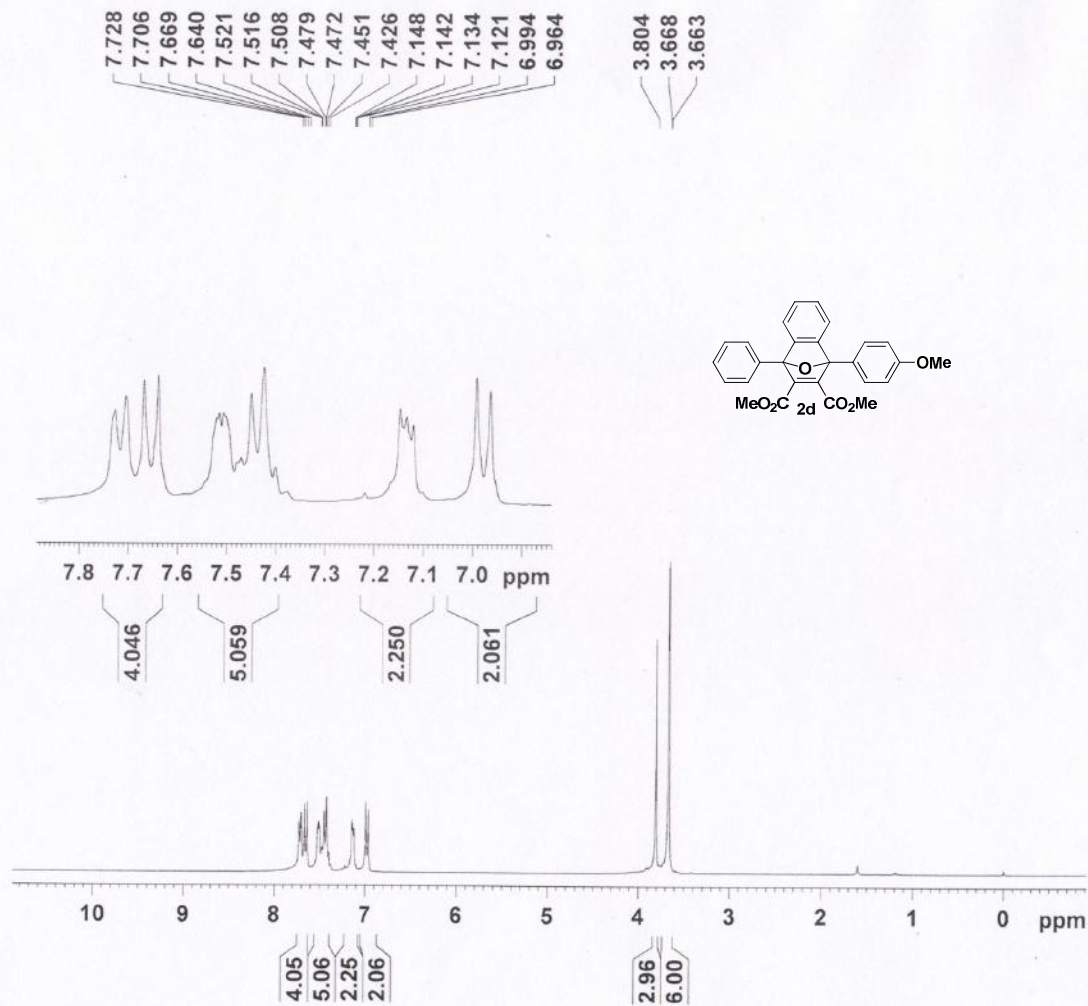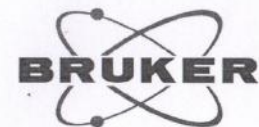

Current Data Parameters  
 NAME MM-PPA-9-I  
 EXPNO 1  
 PROCNO 1

F2 - Acquisition Parameters  
 Date\_ 20100802  
 Time 17.03  
 INSTRUM spect  
 PROBHD 5 mm DUL 13C-1  
 PULPROG zg30  
 TD 65536  
 SOLVENT CDCl3  
 NS 8  
 DS 2  
 SWH 6172.839 Hz  
 FIDRES 0.094190 Hz  
 AQ 5.3084660 sec  
 RG 40.3  
 DW 81.000 usec  
 DE 5.00 usec  
 TE 300.0 K  
 D1 1.0000000 sec  
 TD0 1

==== CHANNEL f1 =====  
 NUC1 1H  
 P1 13.15 usec  
 PL1 0.00 dB  
 SFO1 300.1318534 MHz

F2 - Processing parameters  
 SI 32768  
 SF 300.1300183 MHz  
 WDW EM  
 SSB 0  
 LB 0.30 Hz  
 GB 0  
 PC 1.00

<sup>1</sup>H-NMR Spectra of Compound **2d**



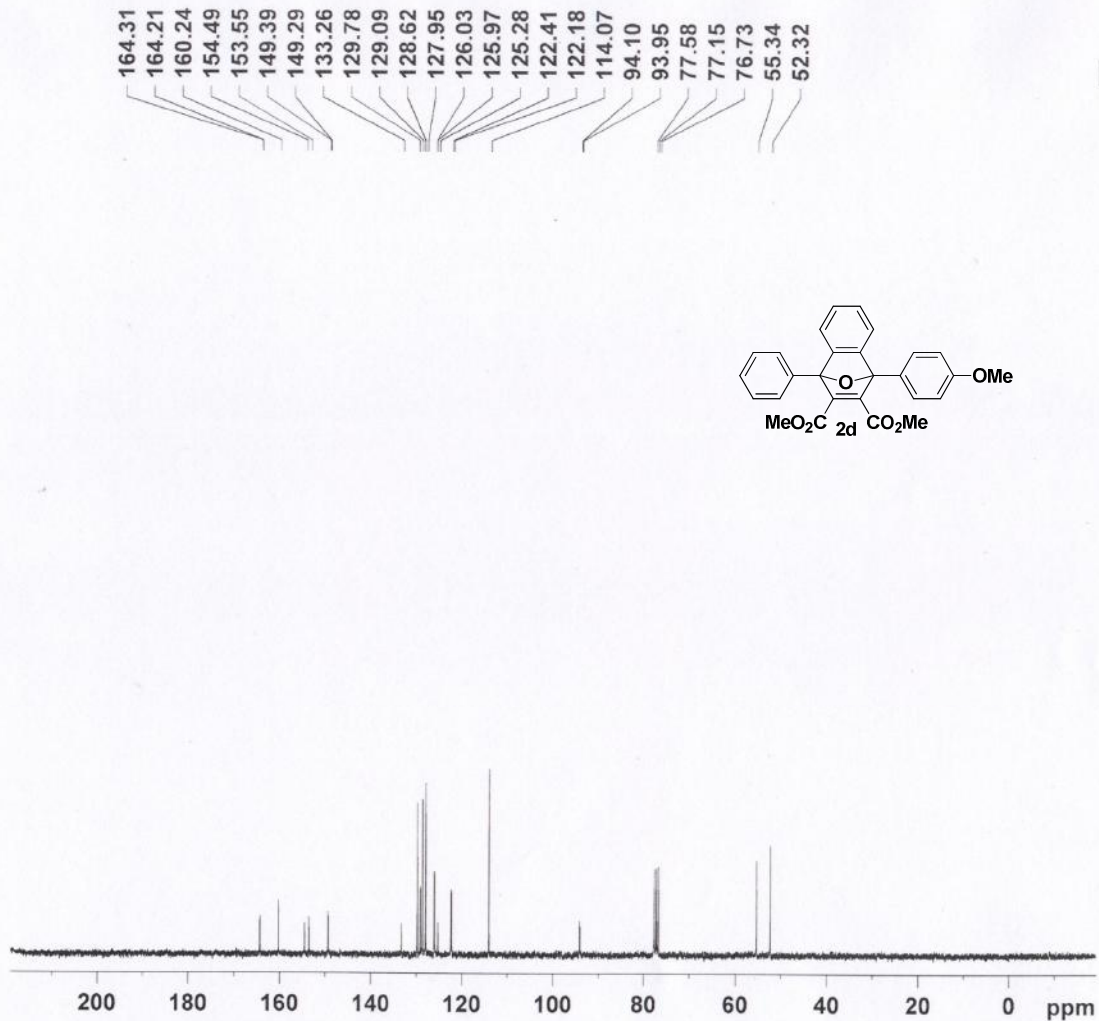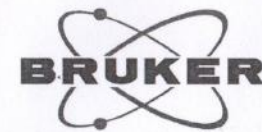

Current Data Parameters  
 NAME MM-PPA-9-I  
 EXPNO 2  
 PROCNO 1

F2 - Acquisition Parameters  
 Date\_ 20100802  
 Time 17.07  
 INSTRUM spect  
 PROBHD 5 mm DUL 13C-1  
 PULPROG zgpg30  
 TD 65536  
 SOLVENT CDCl3  
 NS 56  
 DS 4  
 SWH 17985.611 Hz  
 FIDRES 0.274439 Hz  
 AQ 1.8219508 sec  
 RG 1824.6  
 DW 27.800 usec  
 DE 6.00 usec  
 TE 300.0 K  
 D1 2.00000000 sec  
 d11 0.03000000 sec  
 DELTA 1.89999998 sec  
 TDO 1

===== CHANNEL f1 =====  
 NUC1 13C  
 P1 7.40 usec  
 PL1 -2.00 dB  
 SFO1 75.4752953 MHz

===== CHANNEL f2 =====  
 CPDPRG2 waltz16  
 NUC2 1H  
 PCPD2 80.00 usec  
 PL2 0.00 dB  
 PL12 15.68 dB  
 PL13 16.00 dB  
 SFO2 300.1312005 MHz

F2 - Processing parameters  
 SI 32768  
 SF 75.4677490 MHz  
 WDW EM  
 SSB 0  
 LB 1.00 Hz

<sup>13</sup>C-NMR Spectra of Compound **2d**

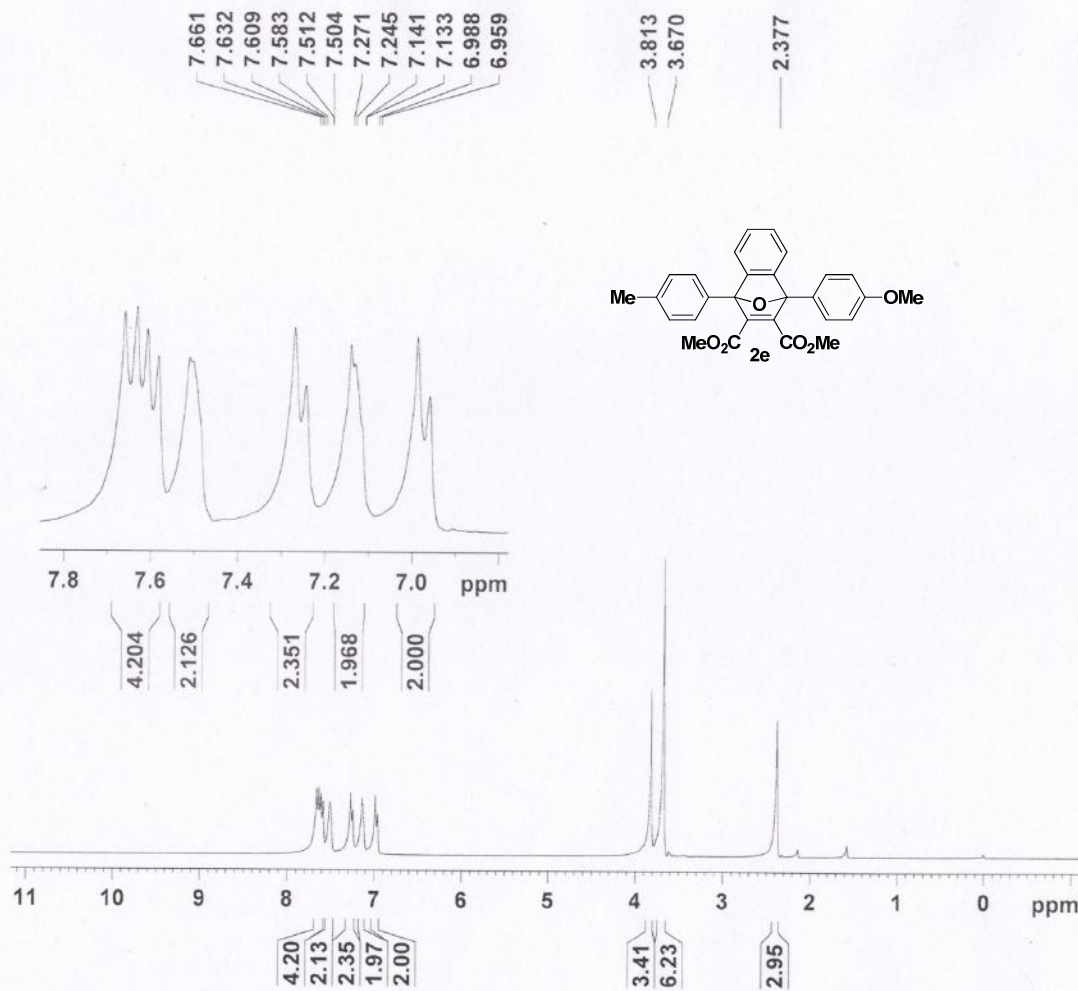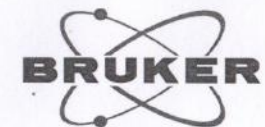

Current Data Parameters  
 NAME MM-TAA  
 EXPNO 1  
 PROCNO 1

F2 - Acquisition Parameters  
 Date\_ 20100804  
 Time 21.11  
 INSTRUM spect  
 PROBHD 5 mm DUL 13C-1  
 PULPROG zg30  
 TD 65536  
 SOLVENT CDCl3  
 NS 6  
 DS 2  
 SWH 6172.839 Hz  
 FIDRES 0.094190 Hz  
 AQ 5.3084660 sec  
 RG 40.3  
 DW 81.000 usec  
 DE 6.00 usec  
 TE 300.0 K  
 D1 1.0000000 sec  
 TD0 1

===== CHANNEL f1 =====  
 NUC1 1H  
 P1 13.15 usec  
 PL1 0.00 dB  
 SFO1 300.1318534 MHz

F2 - Processing parameters  
 SI 32768  
 SF 300.1300150 MHz  
 WDW EM  
 SSB 0  
 LB 0.30 Hz  
 GB 0  
 PC 1.00

<sup>1</sup>H-NMR Spectra of Compound 2e

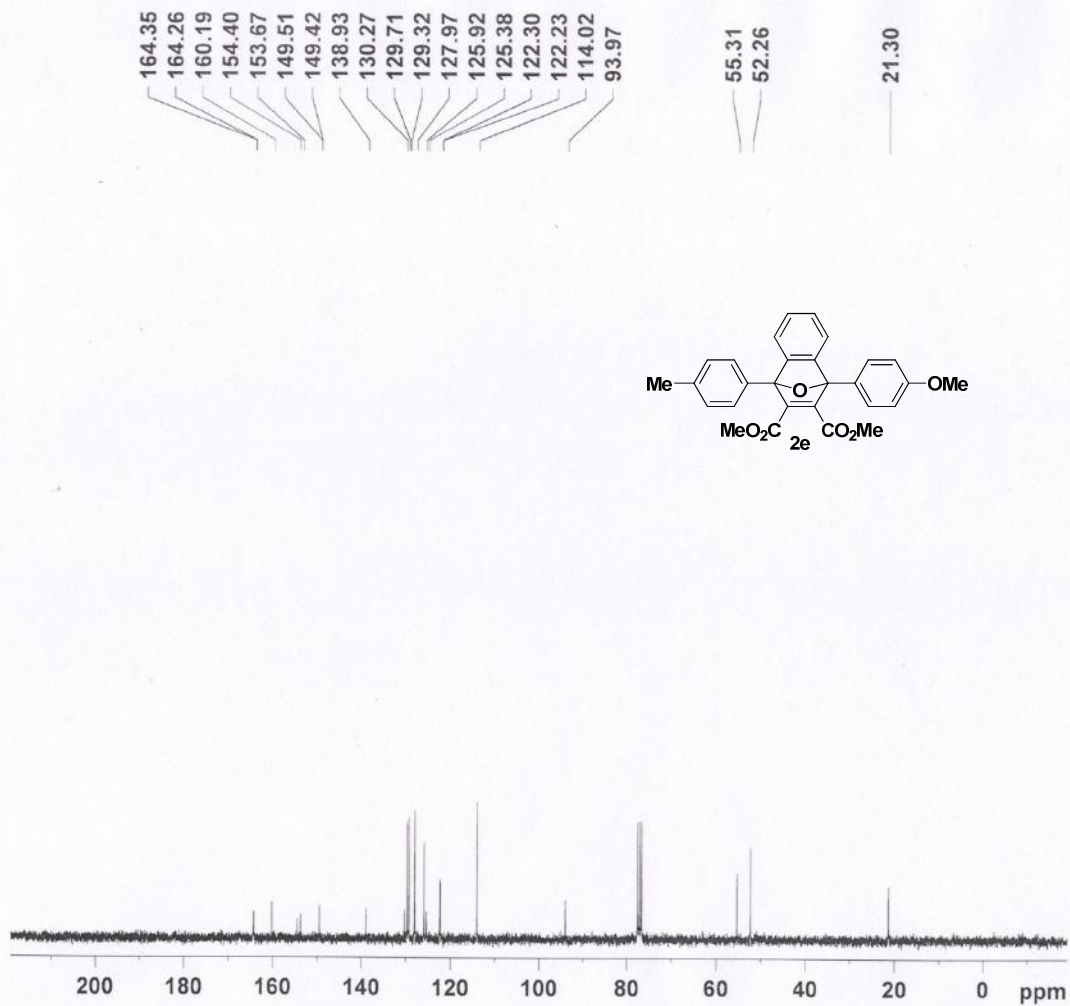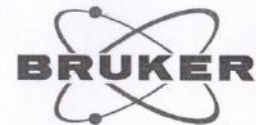

Current Data Parameters  
 NAME MM-TAA  
 EXPNO 2  
 PROCNO 1

F2 - Acquisition Parameters  
 Date\_ 20100804  
 Time 21.16  
 INSTRUM spect  
 PROBHD 5 mm DUL 13C-1  
 PULPROG zgpg30  
 TD 65536  
 SOLVENT CDCl3  
 NS 48  
 DS 4  
 SWH 17985.611 Hz  
 FIDRES 0.274439 Hz  
 AQ 1.8219508 sec  
 RG 362  
 DW 27.800 usec  
 DE 6.00 usec  
 TE 300.0 K  
 D1 2.0000000 sec  
 d11 0.03000000 sec  
 DELTA 1.89999998 sec  
 TD0 1

===== CHANNEL f1 =====  
 NUC1 13C  
 P1 7.40 usec  
 PL1 -2.00 dB  
 SFO1 75.4752953 MHz

===== CHANNEL f2 =====  
 CPDPRG2 waltz16  
 NUC2 1H  
 PCPD2 80.00 usec  
 PL2 0.00 dB  
 PL12 15.68 dB  
 PL13 16.00 dB  
 SFO2 300.1312005 MHz

F2 - Processing parameters  
 SI 32768  
 SF 75.4677490 MHz  
 WDW EM  
 SSB 0  
 LB 1.00 Hz

<sup>13</sup>C-NMR Spectra of Compound 2e



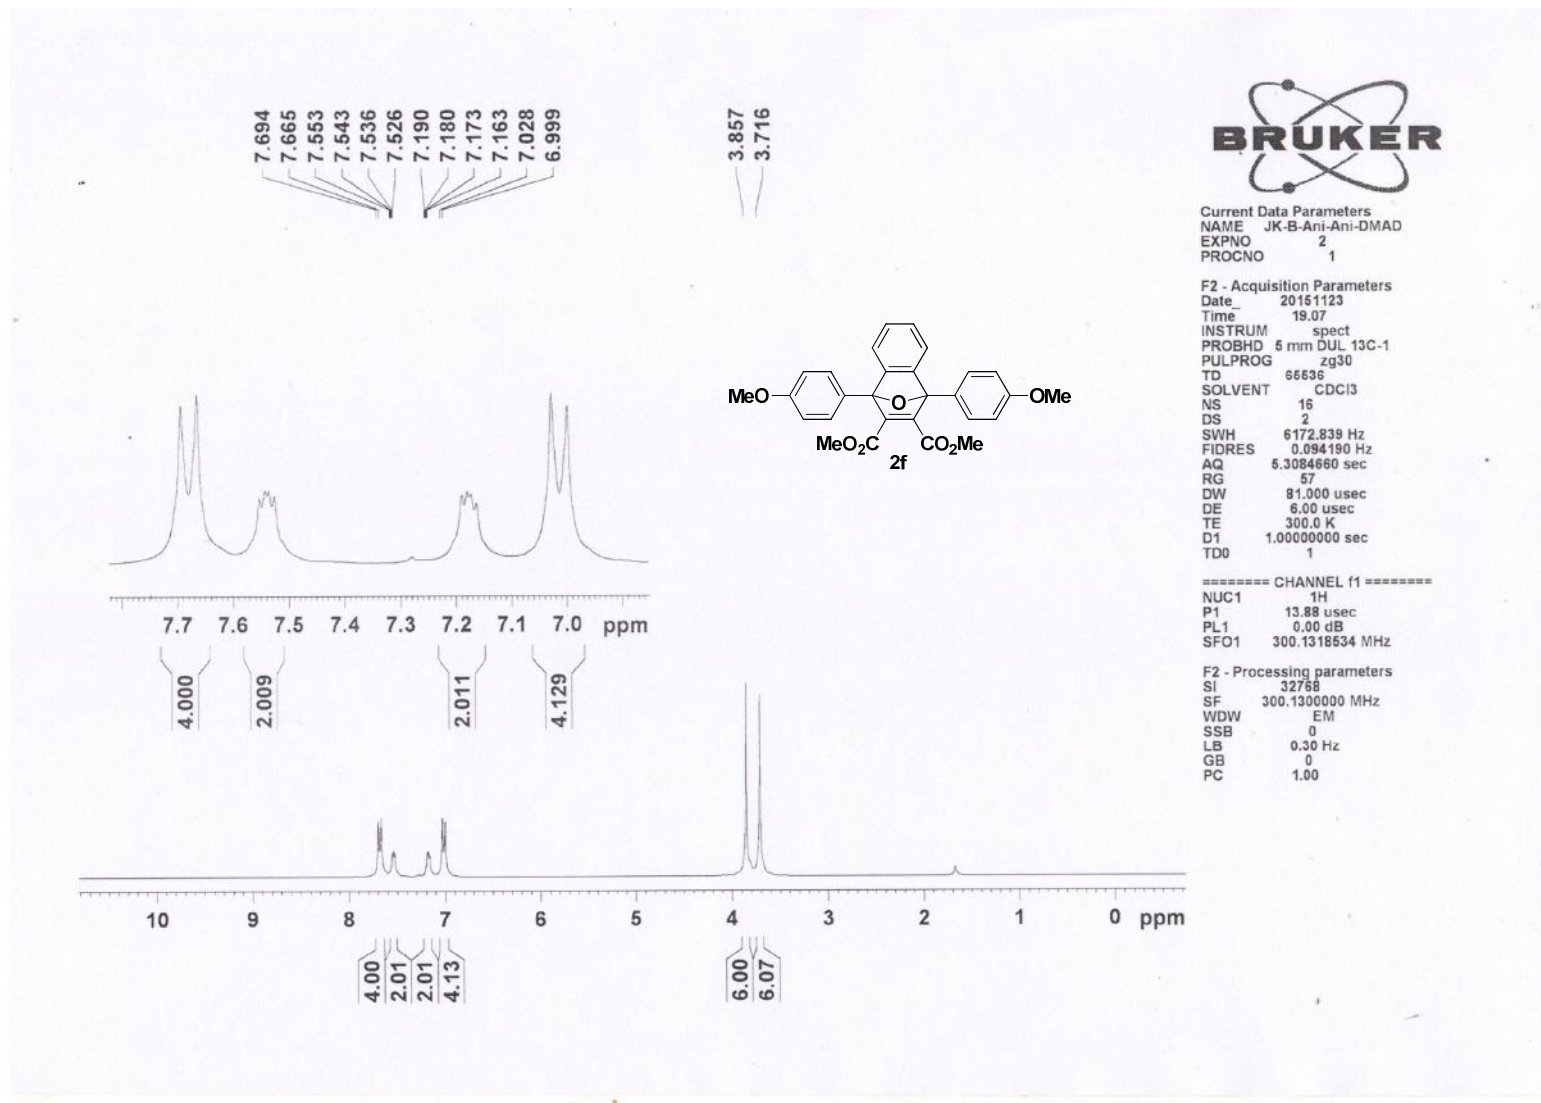

<sup>1</sup>H-NMR Spectra of Compound 2f

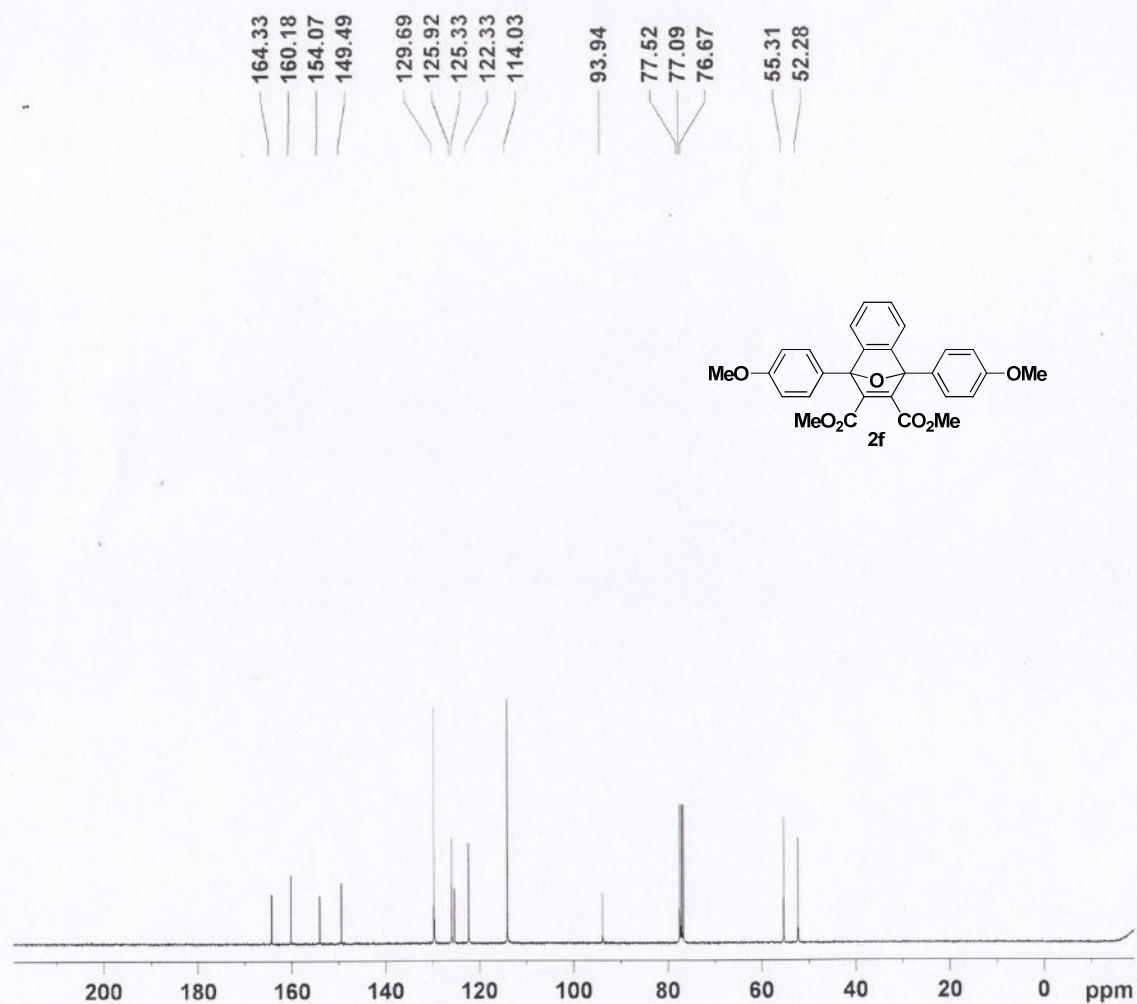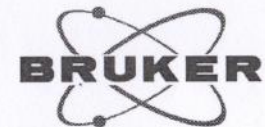

Current Data Parameters  
NAME JK-B-Ani-Ani-DMAD  
EXPNO 1  
PROCNO 1

F2 - Acquisition Parameters  
Date\_ 20151123  
Time 19.03  
INSTRUM spect  
PROBHD 5 mm DUL 13C-1  
PULPROG zgpg30  
TD 65536  
SOLVENT CDCl3  
NS 861  
DS 4  
SWH 17985.611 Hz  
FIDRES 0.274439 Hz  
AQ 1.8219508 sec  
RG 812.7  
DW 27.800 usec  
DE 6.00 usec  
TE 300.0 K  
D1 2.0000000 sec  
d11 0.03000000 sec  
DELTA 1.89999998 sec  
TD0 1

===== CHANNEL f1 =====  
NUC1 13C  
P1 10.38 usec  
PL1 0.00 dB  
SFO1 75.4752953 MHz

===== CHANNEL f2 =====  
CPDPRG2 waltz16  
NUC2 1H  
PCPD2 80.00 usec  
PL2 0.00 dB  
PL12 15.21 dB  
PL13 16.00 dB  
SFO2 300.1312005 MHz

F2 - Processing parameters  
SI 32768  
SF 75.4677490 MHz  
WDW EM  
SSB 0  
LB 1.00 Hz  
GB 0  
PC 1.40

<sup>13</sup>C-NMR Spectra of Compound 2f

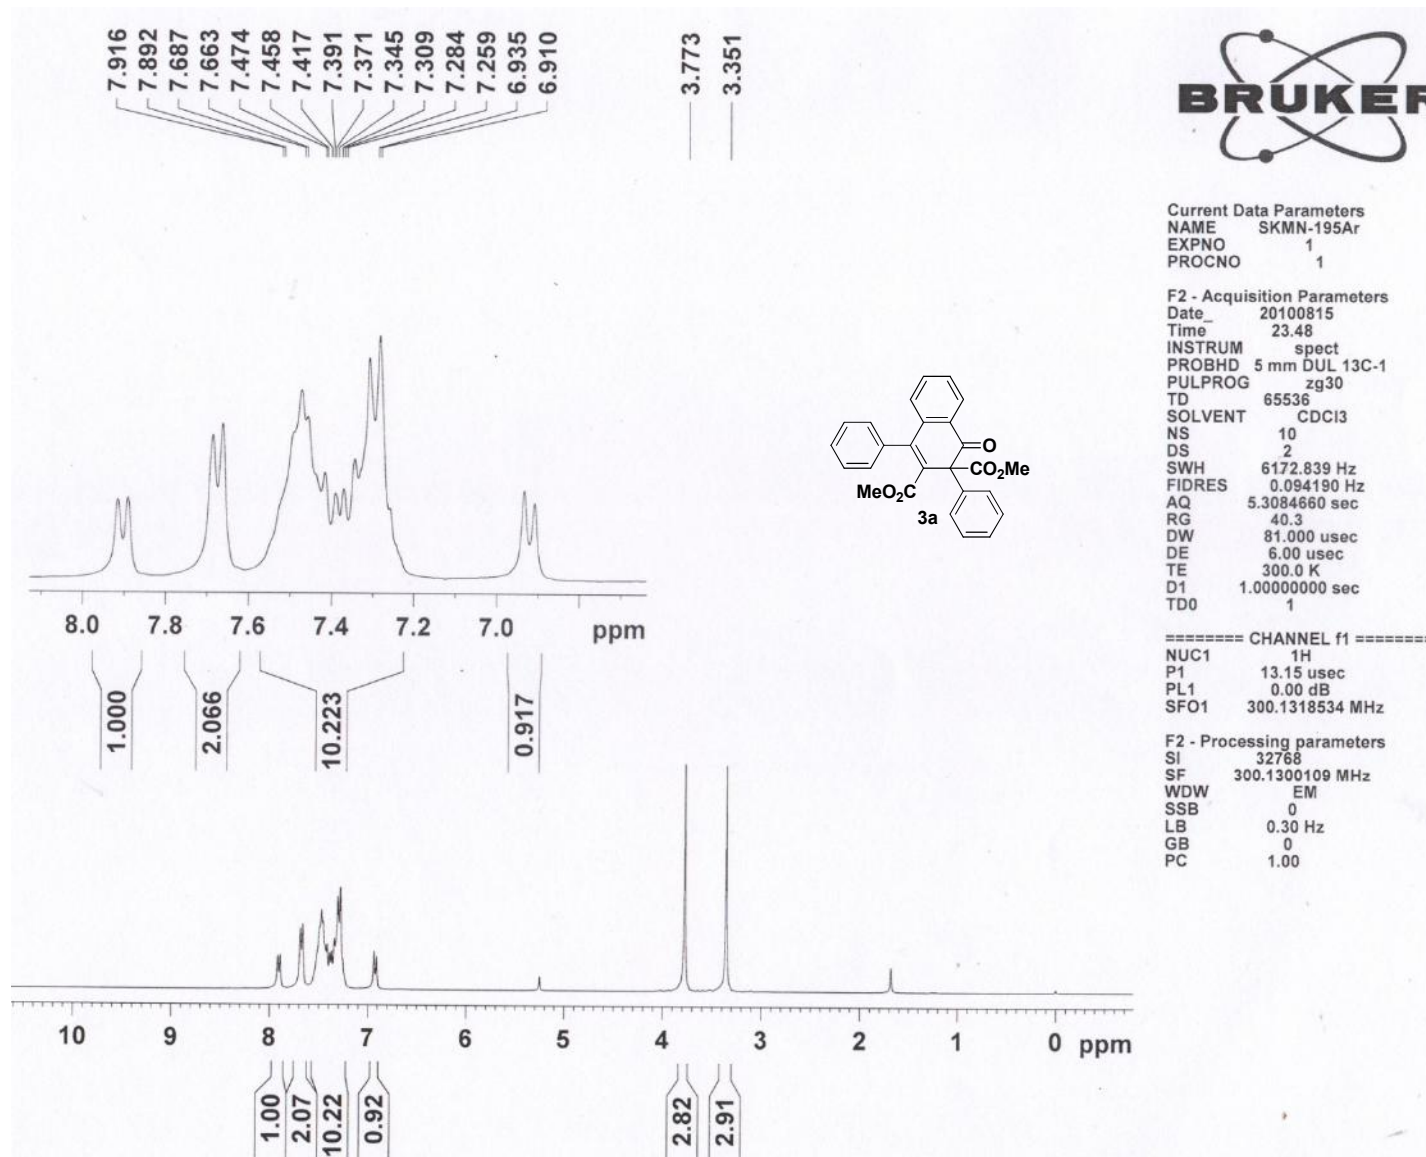

<sup>1</sup>H-NMR Spectra of Compound 3a

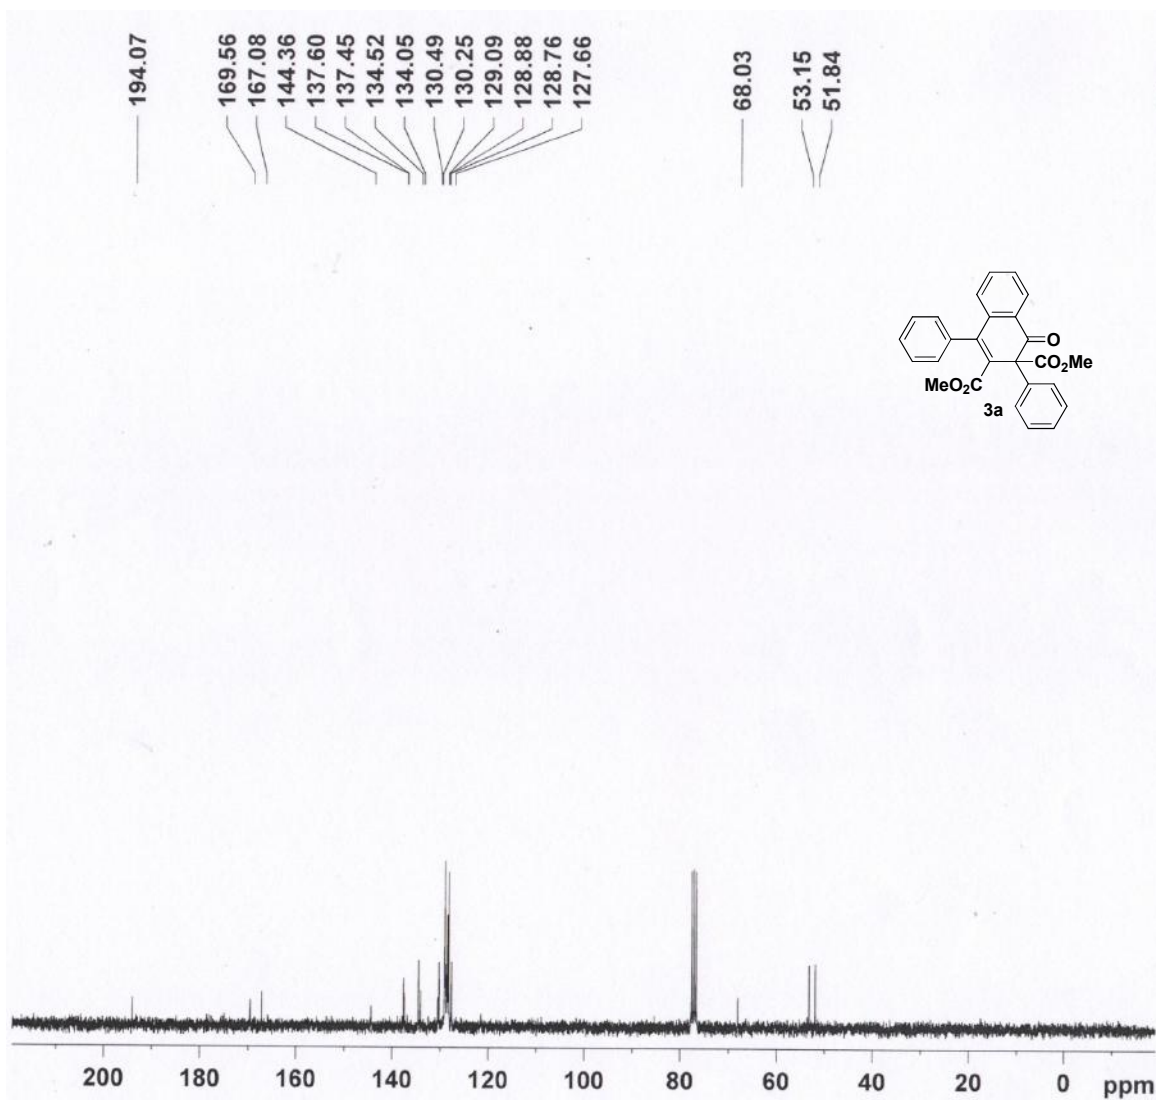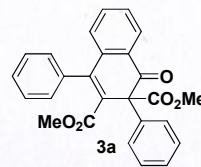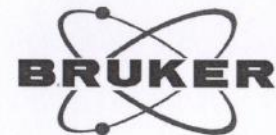

Current Data Parameters  
NAME SKMN-195Ar  
EXPNO 2  
PROCNO 1

F2 - Acquisition Parameters  
Date\_ 20100815  
Time 23.58  
INSTRUM spect  
PROBHD 5 mm DUL 13C-1  
PULPROG zgpg30  
TD 65536  
SOLVENT CDCl3  
NS 25  
DS 4  
SWH 17985.611 Hz  
FIDRES 0.274439 Hz  
AQ 1.8219508 sec  
RG 362  
DW 27.800 usec  
DE 6.00 usec  
TE 300.0 K  
D1 2.0000000 sec  
d11 0.0300000 sec  
DELTA 1.89999998 sec  
TD0 1

===== CHANNEL f1 =====  
NUC1 13C  
P1 7.40 usec  
PL1 -2.00 dB  
SFO1 75.4752953 MHz

===== CHANNEL f2 =====  
CPDPRG2 waltz16  
NUC2 1H  
PCPD2 80.00 usec  
PL2 0.00 dB  
PL12 15.68 dB  
PL13 16.00 dB  
SFO2 300.1312005 MHz

F2 - Processing parameters  
SI 32768  
SF 75.4677490 MHz  
WDW EM  
SSB 0  
LB 1.00 Hz

<sup>13</sup>C-NMR Spectra of Compound 3a

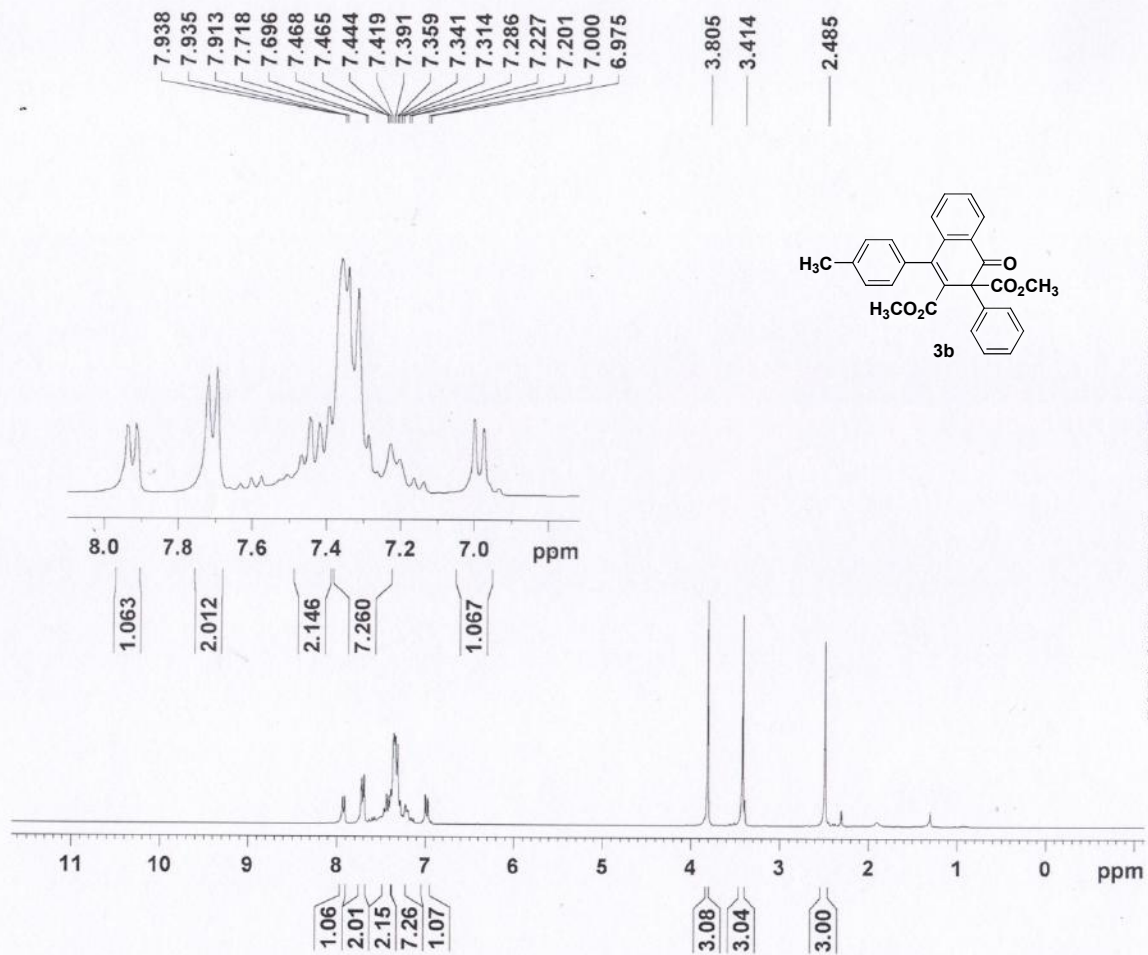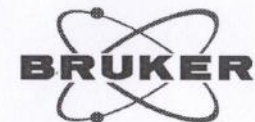

Current Data Parameters  
 NAME JK-B-TOL-PHE-RA  
 EXPNO 1  
 PROCNO 1

F2 - Acquisition Parameters  
 Date\_ 20151112  
 Time 21.10  
 INSTRUM spect  
 PROBHD 5 mm DUL 13C-1  
 PULPROG zg30  
 TD 65536  
 SOLVENT CDCl3  
 NS 16  
 DS 2  
 SWH 6172.839 Hz  
 FIDRES 0.094190 Hz  
 AQ 5.3084660 sec  
 RG 45.3  
 DW 81.000 usec  
 DE 6.00 usec  
 TE 300.0 K  
 D1 1.00000000 sec  
 TD0 1

===== CHANNEL f1 =====  
 NUC1 <sup>1</sup>H  
 P1 13.88 usec  
 PL1 0.00 dB  
 SFO1 300.1318534 MHz

F2 - Processing parameters  
 SI 32768  
 SF 300.1300000 MHz  
 WDW EM  
 SSB 0  
 LB 0.30 Hz  
 GB 0  
 PC 1.00

<sup>1</sup>H-NMR Spectra of Compound **3b**



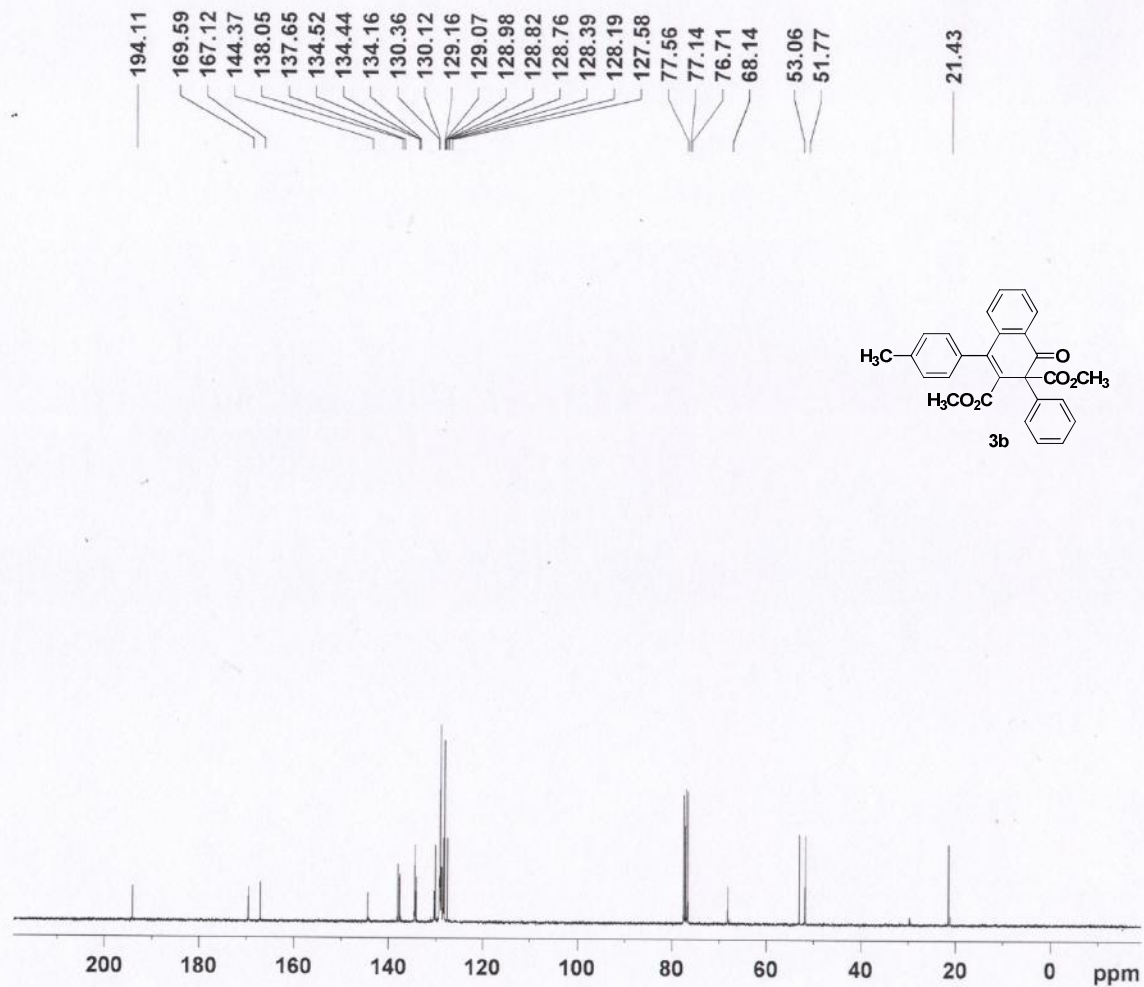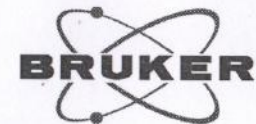

Current Data Parameters  
 NAME JK-B-TOL-PHE-RA  
 EXPNO 3  
 PROCNO 1

F2 - Acquisition Parameters  
 Date 20151112  
 Time 21.46  
 INSTRUM spect  
 PROBHD 5 mm DUL 13C-1  
 PULPROG zgpg30  
 TD 65536  
 SOLVENT CDCl3  
 NS 400  
 DS 4  
 SWH 17985.611 Hz  
 FIDRES 0.274439 Hz  
 AQ 1.8219508 sec  
 RG 912.3  
 DW 27.800 usec  
 DE 6.00 usec  
 TE 300.0 K  
 D1 2.00000000 sec  
 d11 0.03000000 sec  
 DELTA 1.89999998 sec  
 TD0 1

===== CHANNEL f1 =====  
 NUC1 13C  
 P1 10.38 usec  
 PL1 0.00 dB  
 SFO1 75.4752953 MHz

===== CHANNEL f2 =====  
 CPDPRG2 waltz16  
 NUC2 1H  
 PCPD2 80.00 usec  
 PL2 0.00 dB  
 PL12 15.21 dB  
 PL13 16.00 dB  
 SFO2 300.1312005 MHz

F2 - Processing parameters  
 SI 32768  
 SF 75.4677490 MHz  
 WDW EM  
 SSB 0  
 LB 1.00 Hz  
 GB 0  
 PC 1.40

<sup>13</sup>C-NMR Spectra of Compound 3b

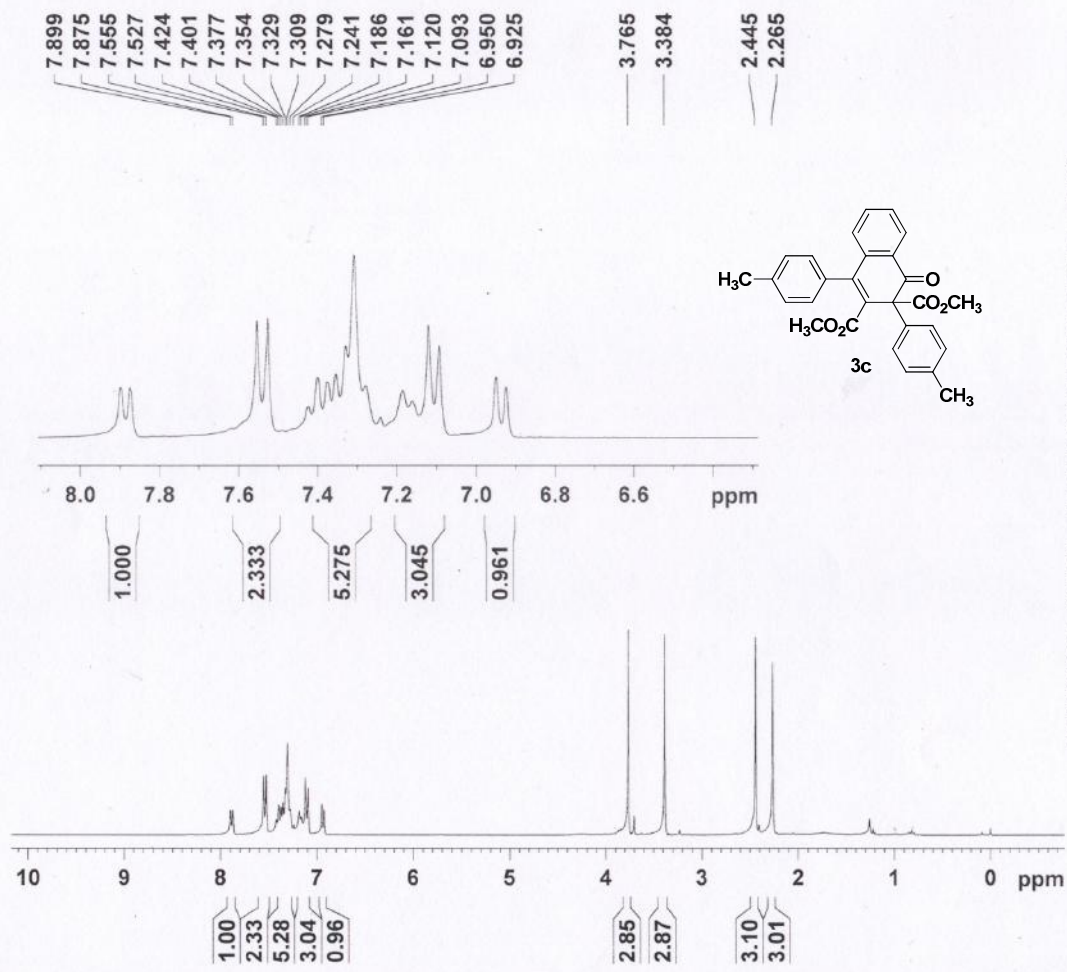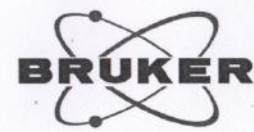

Current Data Parameters  
 NAME MNSJ-43  
 EXPNO 1  
 PROCNO 1

F2 - Acquisition Parameters  
 Date\_ 20110111  
 Time 13.25  
 INSTRUM spect  
 PROBHD 5 mm DUL 13C-1  
 PULPROG zg30  
 TD 65536  
 SOLVENT CDCl3  
 NS 9  
 DS 2  
 SWH 6172.839 Hz  
 FIDRES 0.094190 Hz  
 AQ 5.3084660 sec  
 RG 40.3  
 DW 81.000 usec  
 DE 6.00 usec  
 TE 300.0 K  
 D1 1.00000000 sec  
 TD0 1

===== CHANNEL f1 =====  
 NUC1 1H  
 P1 13.15 usec  
 PL1 0.00 dB  
 SFO1 300.1318534 MHz

F2 - Processing parameters  
 SI 32768  
 SF 300.1300120 MHz  
 WDW EM  
 SSB 0  
 LB 0.30 Hz  
 GB 0  
 PC 1.00

<sup>1</sup>H-NMR Spectra of Compound **3c**

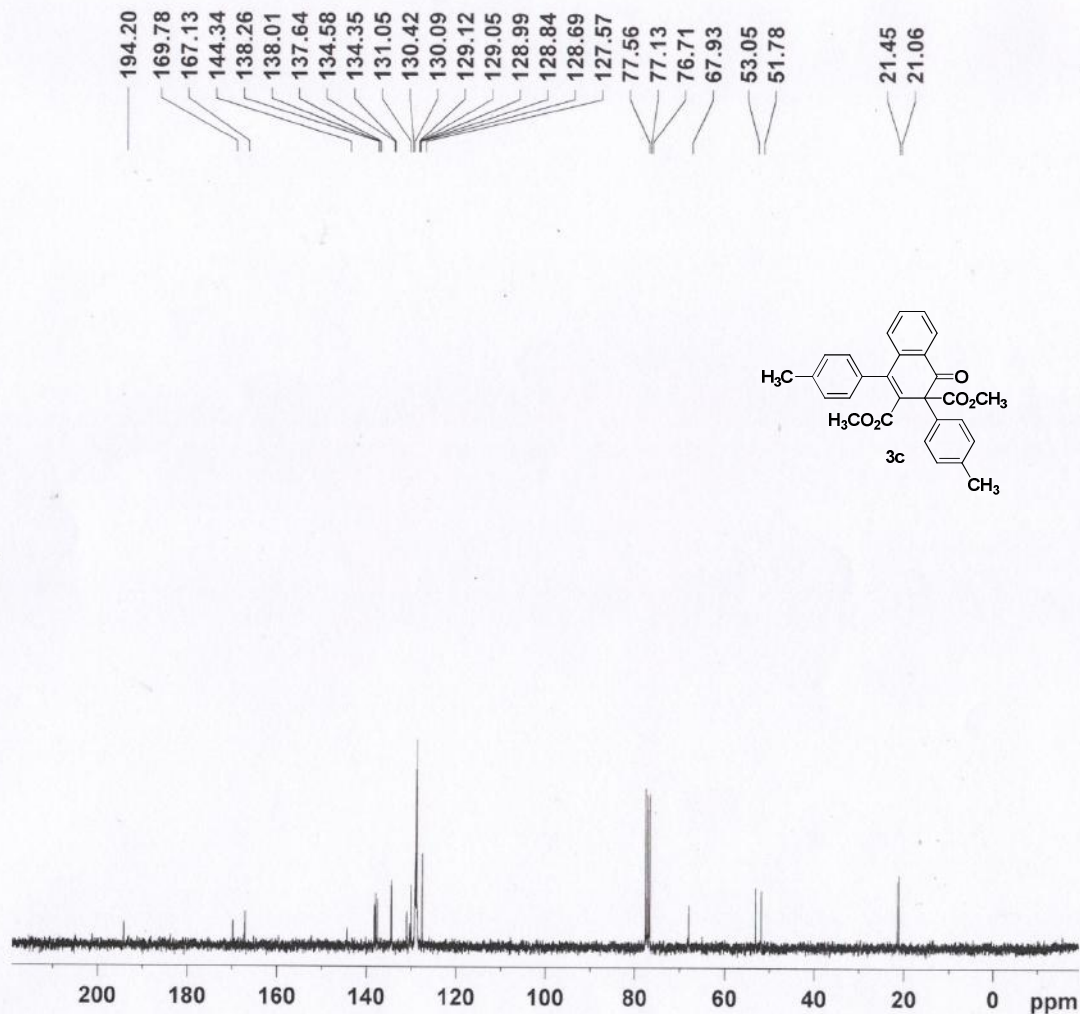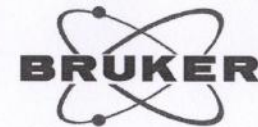

Current Data Parameters  
NAME MNSJ-43NEW  
EXPNO 1  
PROCNO 1

F2 - Acquisition Parameters  
Date\_ 20110111  
Time 13.34  
INSTRUM spect  
PROBHD 5 mm DUL 13C-1  
PULPROG zgpg30  
TD 65536  
SOLVENT CDCl3  
NS 69  
DS 4  
SWH 17985.611 Hz  
FIDRES 0.274439 Hz  
AQ 1.8219508 sec  
RG 362  
DW 27.800 usec  
DE 6.00 usec  
TE 300.0 K  
D1 2.0000000 sec  
d11 0.0300000 sec  
DELTA 1.89999998 sec  
TD0 1

===== CHANNEL f1 =====  
NUC1 13C  
P1 7.40 usec  
PL1 -2.00 dB  
SFO1 75.4752953 MHz

===== CHANNEL f2 =====  
CPDPRG2 waltz16  
NUC2 1H  
PCPD2 80.00 usec  
PL2 0.00 dB  
PL12 15.68 dB  
PL13 16.00 dB  
SFO2 300.1312005 MHz

F2 - Processing parameters  
SI 32768  
SF 75.4677490 MHz  
WDW EM  
SSB 0  
LB 1.00 Hz

<sup>13</sup>C-NMR Spectra of Compound **3c**



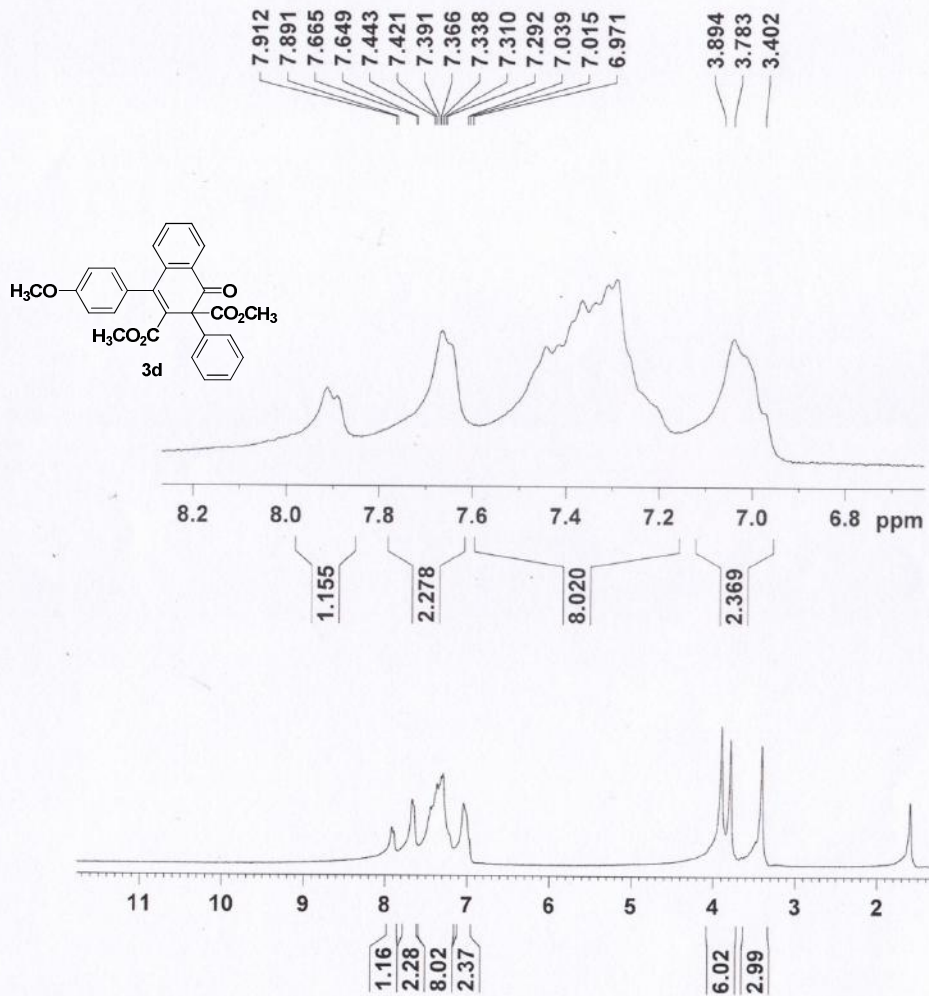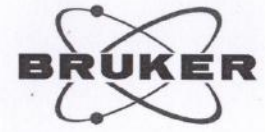

Current Data Parameters  
 NAME MN-B-48H  
 EXPNO 1  
 PROCNO 1

F2 - Acquisition Parameters  
 Date\_ 20110120  
 Time 1.21  
 INSTRUM spect  
 PROBHD 5 mm DUL 13C-1  
 PULPROG zg30  
 TD 65536  
 SOLVENT CDCl3  
 NS 11  
 DS 2  
 SWH 6172.839 Hz  
 FIDRES 0.094190 Hz  
 AQ 5.3084660 sec  
 RG 228.1  
 DW 81.000 usec  
 DE 6.00 usec  
 TE 300.0 K  
 D1 1.00000000 sec  
 TD0 1

===== CHANNEL f1 =====  
 NUC1 1H  
 P1 13.15 usec  
 PL1 0.00 dB  
 SFO1 300.1318534 MHz

F2 - Processing parameters  
 SI 32768  
 SF 300.1300044 MHz  
 WDW EM  
 SSB 0  
 LB 0.30 Hz  
 GB 0  
 PC 1.00

<sup>1</sup>H-NMR Spectra of Compound **3d**

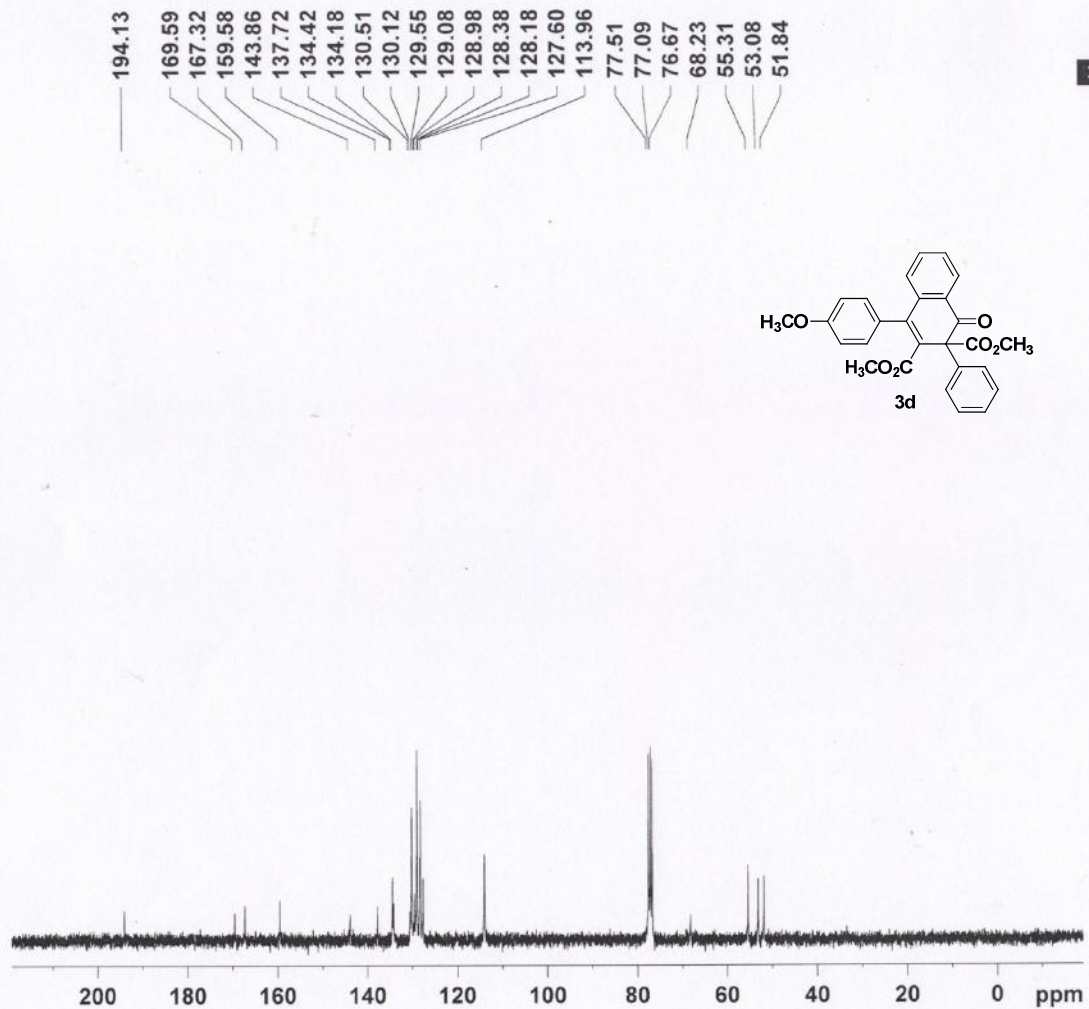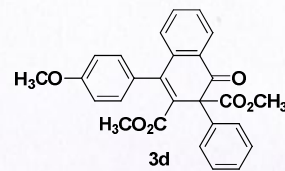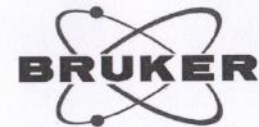

Current Data Parameters  
 NAME MN-B-48  
 EXPNO 2  
 PROCNO 1

F2 - Acquisition Parameters  
 Date\_ 20110120  
 Time\_ 0.16  
 INSTRUM spect  
 PROBHD 5 mm DUL 13C-1  
 PULPROG zgpg30  
 TD 65536  
 SOLVENT CDCl3  
 NS 176  
 DS 4  
 SWH 17985.611 Hz  
 FIDRES 0.274439 Hz  
 AQ 1.8219508 sec  
 RG 574.7  
 DW 27.800 usec  
 DE 6.00 usec  
 TE 300.0 K  
 D1 2.00000000 sec  
 d11 0.03000000 sec  
 DELTA 1.89999998 sec  
 TD0 1

===== CHANNEL f1 =====  
 NUC1 13C  
 P1 7.40 usec  
 PL1 -2.00 dB  
 SFO1 75.4752953 MHz

===== CHANNEL f2 =====  
 CPDPRG2 waltz16  
 NUC2 1H  
 PCPD2 80.00 usec  
 PL2 0.00 dB  
 PL12 15.68 dB  
 PL13 16.00 dB  
 SFO2 300.1312005 MHz

F2 - Processing parameters  
 SI 32768  
 SF 75.4677490 MHz  
 WDW EM  
 SSB 0  
 LB 1.00 Hz

<sup>13</sup>C-NMR Spectra of Compound 3d

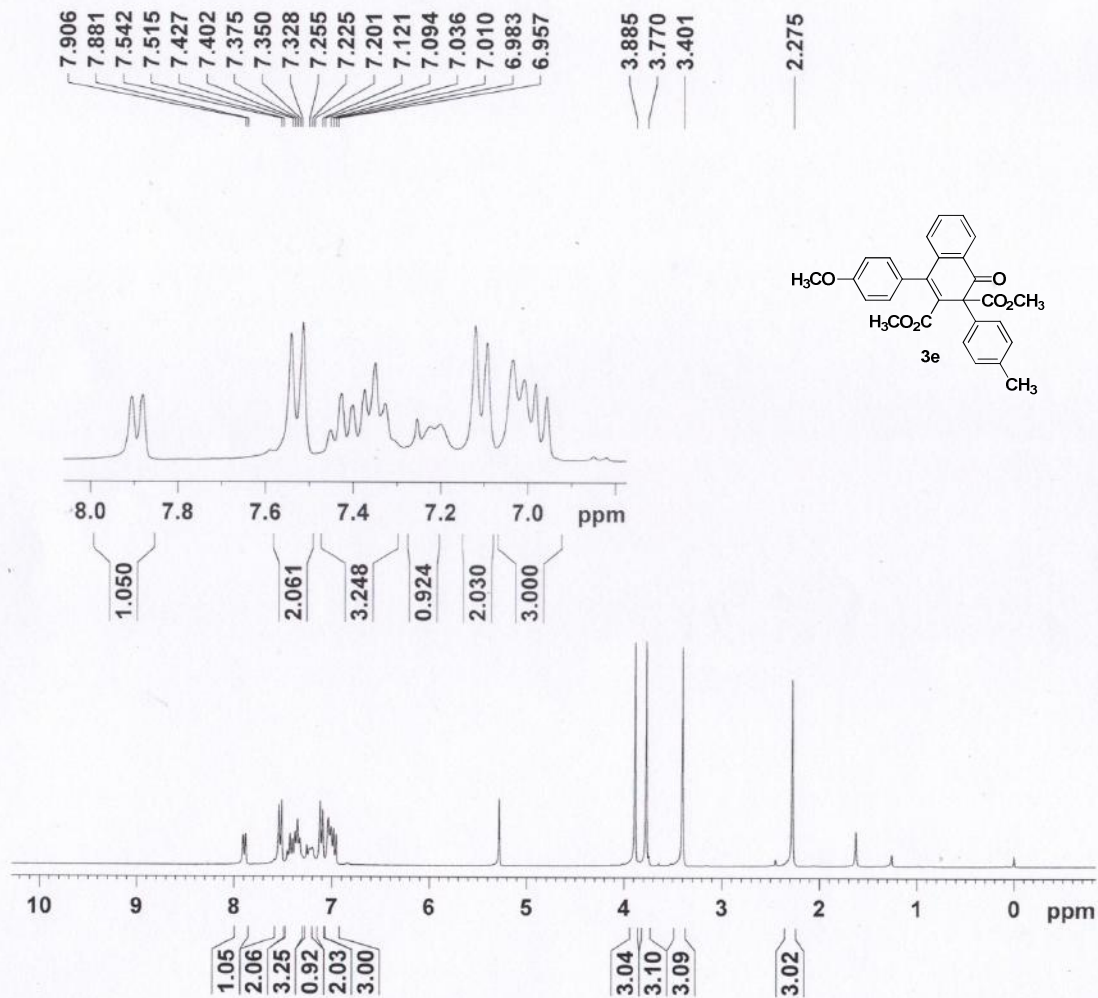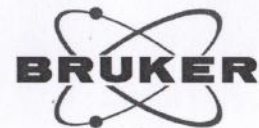

Current Data Parameters

NAME MN-B-62  
EXPNO 1  
PROCNO 1

F2 - Acquisition Parameters

Date\_ 20110202  
Time 17.10  
INSTRUM spect  
PROBHD 5 mm DUL 13C-1  
PULPROG zg30  
TD 65536  
SOLVENT CDCl3  
NS 11  
DS 2  
SWH 6172.839 Hz  
FIDRES 0.094190 Hz  
AQ 5.3084660 sec  
RG 90.5  
DW 81.000 usec  
DE 6.00 usec  
TE 300.0 K  
D1 1.00000000 sec  
TD0 1

===== CHANNEL f1 =====

NUC1 1H  
P1 13.15 usec  
PL1 0.00 dB  
SFO1 300.1318534 MHz

F2 - Processing parameters

SI 32768  
SF 300.1300079 MHz  
WDW EM  
SSB 0  
LB 0.30 Hz  
GB 0  
PC 1.00

<sup>1</sup>H-NMR Spectra of Compound **3e**

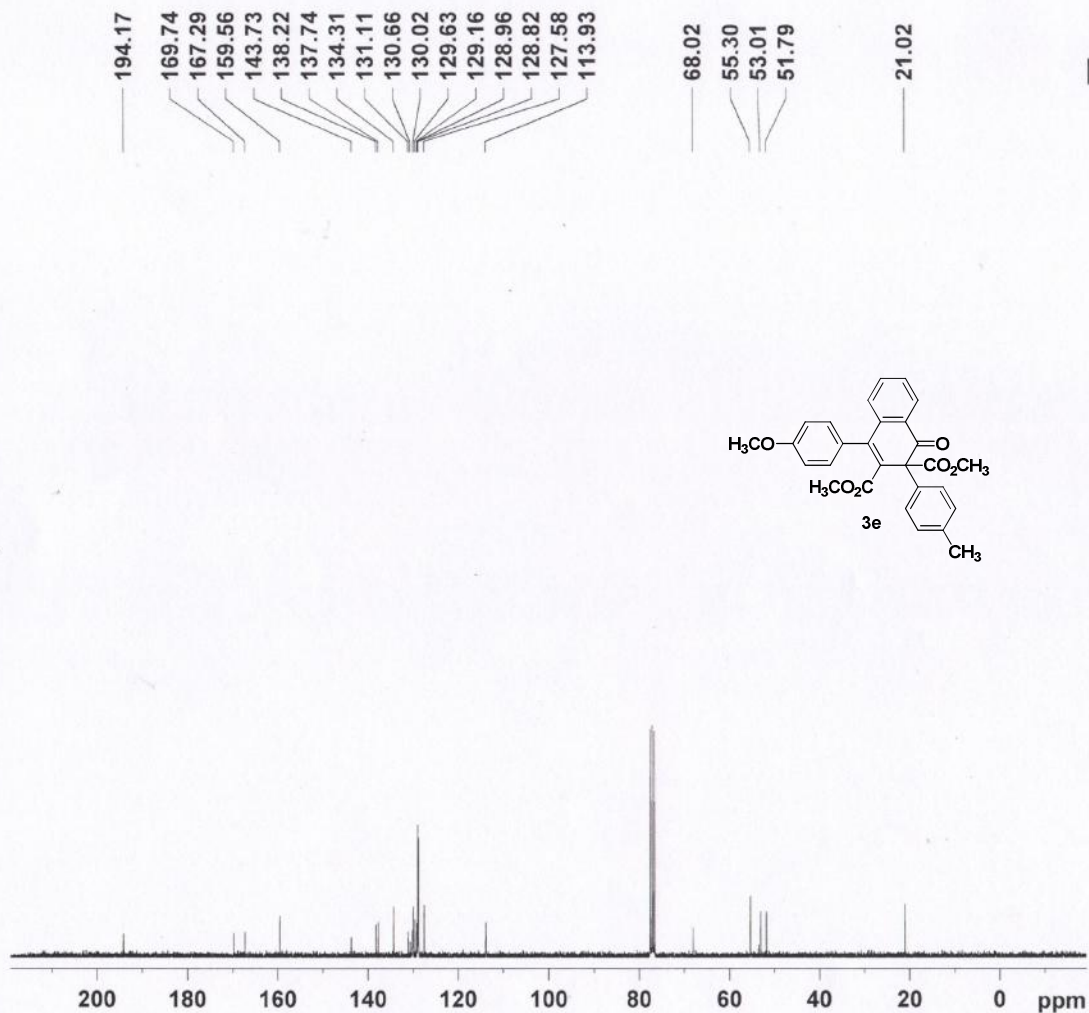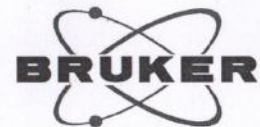

Current Data Parameters  
NAME MN-B-62  
EXPNO 3  
PROCNO 1

F2 - Acquisition Parameters  
Date\_ 20110202  
Time 17.19  
INSTRUM spect  
PROBHD 5 mm DUL 13C-1  
PULPROG zgpg30  
TD 65536  
SOLVENT CDCl3  
NS 141  
DS 4  
SWH 17985.611 Hz  
FIDRES 0.274439 Hz  
AQ 1.8219508 sec  
RG 362  
DW 27.800 usec  
DE 6.00 usec  
TE 300.0 K  
D1 2.00000000 sec  
d11 0.03000000 sec  
DELTA 1.89999998 sec  
TD0 1

===== CHANNEL f1 =====  
NUC1 13C  
P1 7.40 usec  
PL1 -2.00 dB  
SFO1 75.4752953 MHz

===== CHANNEL f2 =====  
CPDPRG2 waltz16  
NUC2 1H  
PCPD2 80.00 usec  
PL2 0.00 dB  
PL12 15.68 dB  
PL13 16.00 dB  
SFO2 300.1312005 MHz

F2 - Processing parameters  
SI 32768  
SF 75.4677490 MHz  
WDW EM  
SSB 0  
LB 1.00 Hz

<sup>13</sup>C-NMR Spectra of Compound **3e**



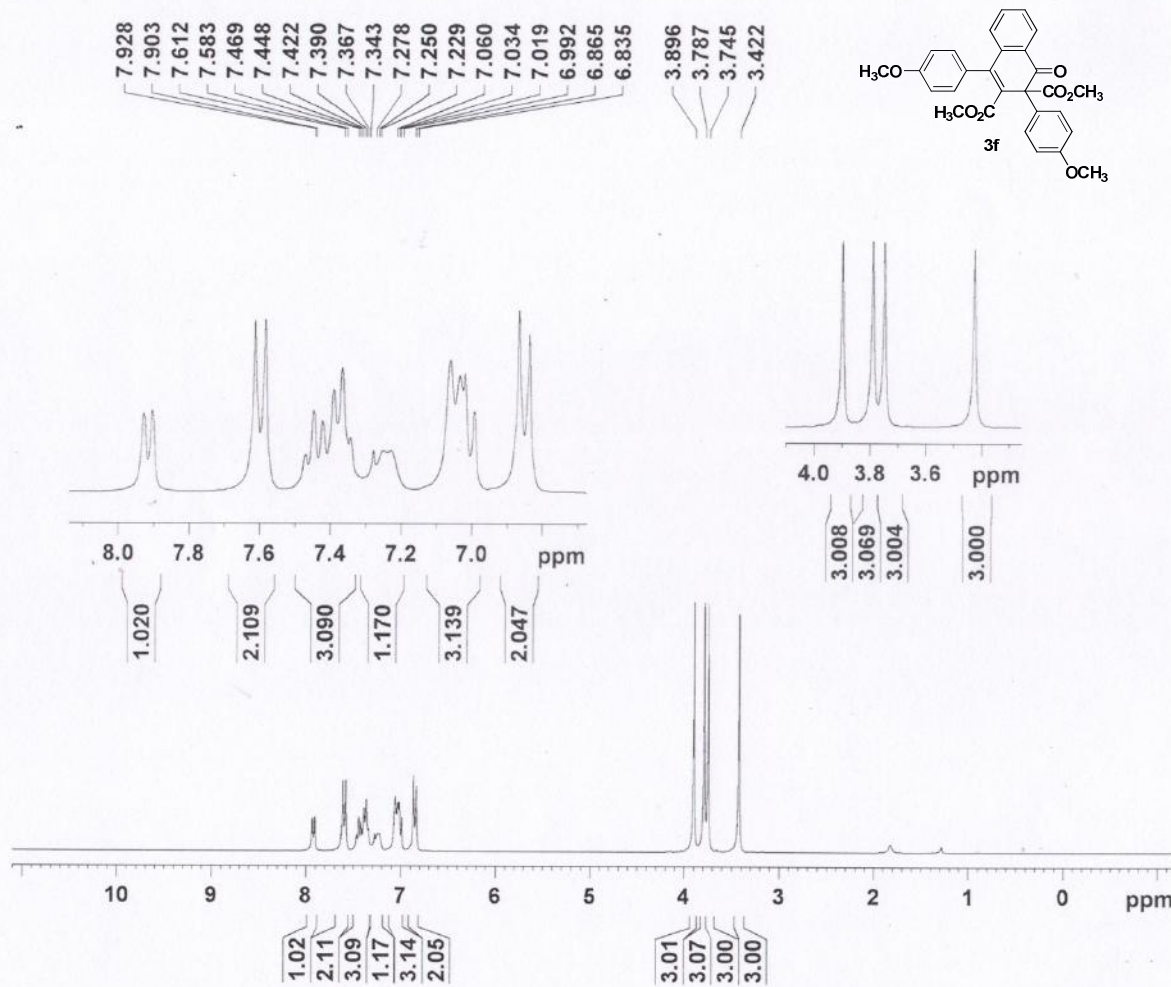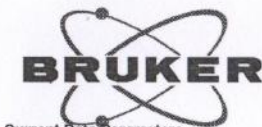

Current Data Parameters  
 NAME JK-B-ANI-ANI-RA  
 EXPNO 5  
 PROCNO 1

F2 - Acquisition Parameters  
 Date\_ 20151113  
 Time 2.13  
 INSTRUM spect  
 PROBHD 5 mm DUL 13C-1  
 PULPROG zg30  
 TD 65536  
 SOLVENT CDCl3  
 NS 16  
 DS 2  
 SWH 6172.839 Hz  
 FIDRES 0.094190 Hz  
 AQ 5.3084660 sec  
 RG 35.9  
 DW 81.000 usec  
 DE 6.00 usec  
 TE 300.0 K  
 D1 1.00000000 sec  
 TDO 1

===== CHANNEL f1 =====  
 NUC1 1H  
 P1 13.88 usec  
 PL1 0.00 dB  
 SFO1 300.1318634 MHz

F2 - Processing parameters  
 SI 32768  
 SF 300.1300000 MHz  
 WDW EM  
 SSB 0  
 LB 0.30 Hz  
 GB 0  
 PC 1.00

<sup>1</sup>H-NMR Spectra of Compound 3f

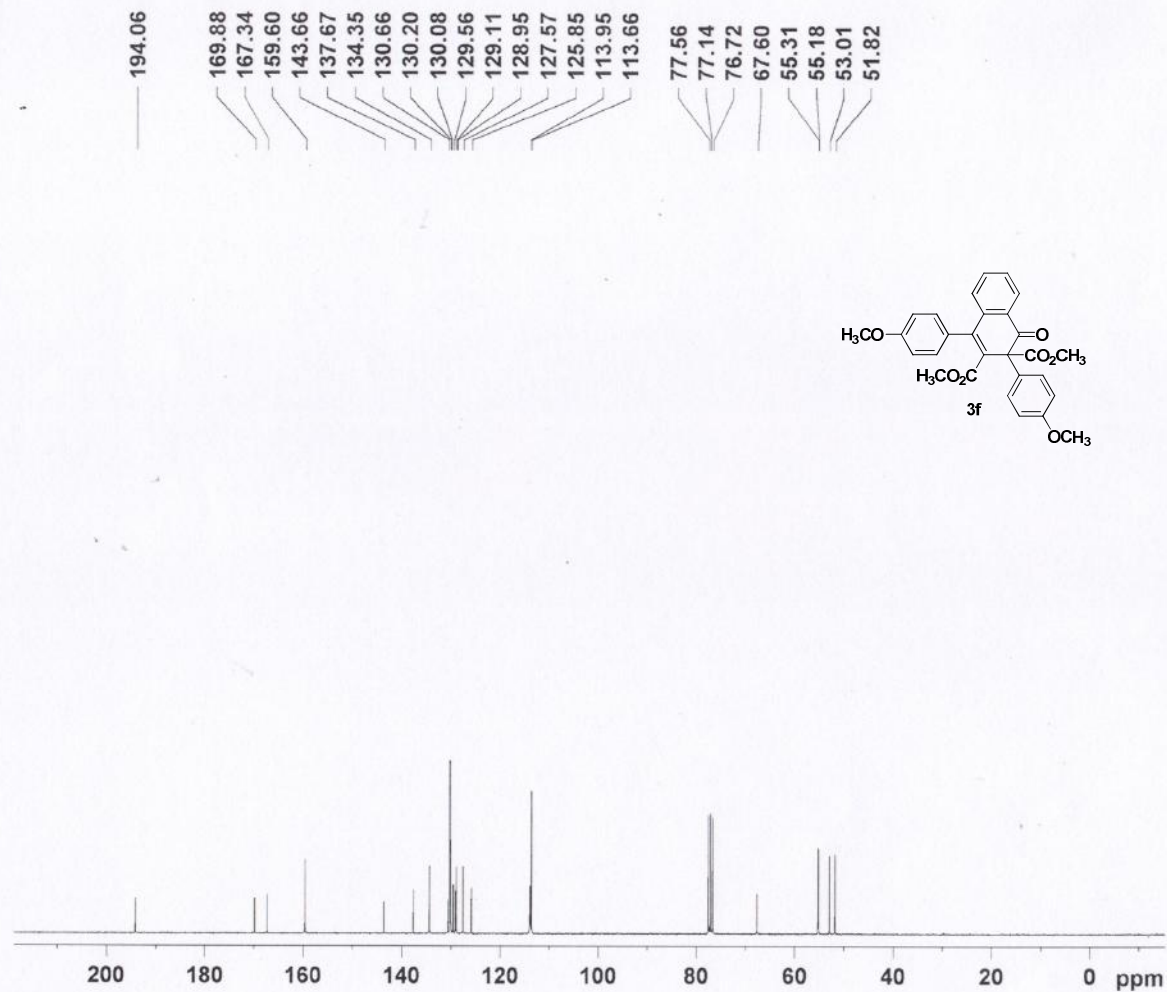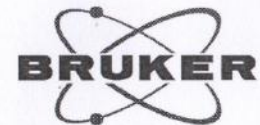

Current Data Parameters  
 NAME JK-B-ANI-ANI-RA  
 EXPNO 4  
 PROCNO 1

F2 - Acquisition Parameters  
 Date\_ 20151113  
 Time 2.10  
 INSTRUM spect  
 PROBHD 5 mm DUL 13C-1  
 PULPROG zgpg30  
 TD 65536  
 SOLVENT CDCl3  
 NS 1200  
 DS 4  
 SWH 17985.611 Hz  
 FIDRES 0.274439 Hz  
 AQ 1.8219508 sec  
 RG 574.7  
 DW 27.800 usec  
 DE 6.00 usec  
 TE 300.0 K  
 D1 2.00000000 sec  
 d11 0.03000000 sec  
 DELTA 1.89999998 sec  
 TD0 1

===== CHANNEL f1 =====  
 NUC1 13C  
 P1 10.38 usec  
 PL1 0.00 dB  
 SFO1 75.4752953 MHz

===== CHANNEL f2 =====  
 CPDPRG2 waltz16  
 NUC2 1H  
 PCPD2 80.00 usec  
 PL2 0.00 dB  
 PL12 15.21 dB  
 PL13 16.00 dB  
 SFO2 300.1312005 MHz

F2 - Processing parameters  
 SI 32768  
 SF 75.4677490 MHz  
 WDW EM  
 SSB 0  
 LB 1.00 Hz  
 GB 0  
 PC 1.40

<sup>13</sup>C-NMR Spectra of Compound 3f

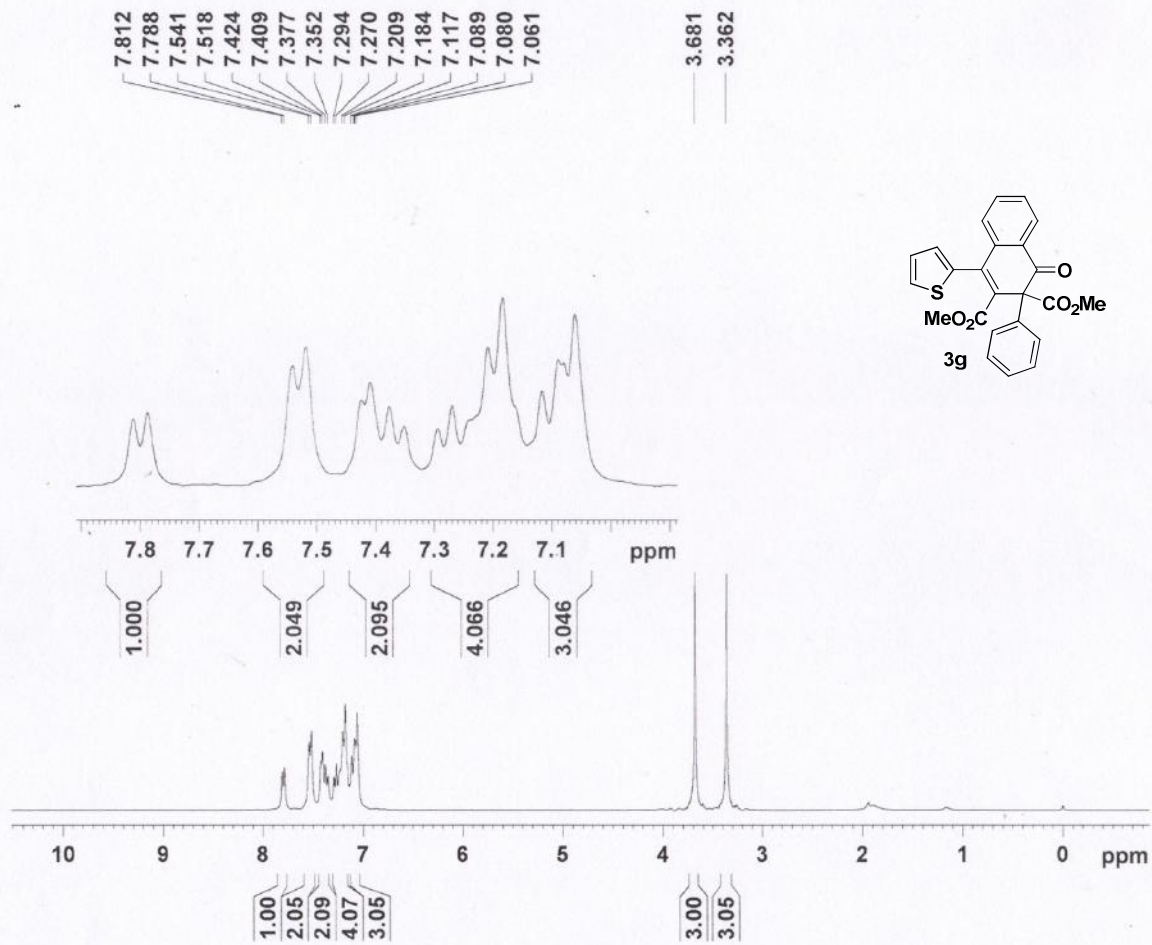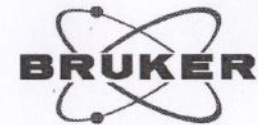

Current Data Parameters  
 NAME JK-B-PH-THI-RA  
 EXPNO 4  
 PROCNO 1

F2 - Acquisition Parameters  
 Date\_ 20151107  
 Time 15.12  
 INSTRUM spect  
 PROBHD 5 mm DUL 13C-1  
 PULPROG zg30  
 TD 65536  
 SOLVENT CDCl3  
 NS 1  
 DS 2  
 SWH 6172.839 Hz  
 FIDRES 0.094190 Hz  
 AQ 5.3084660 sec  
 RG 50.8  
 DW 81.000 usec  
 DE 6.00 usec  
 TE 300.0 K  
 D1 1.00000000 sec  
 TD0 1

===== CHANNEL f1 =====  
 NUC1 1H  
 P1 13.98 usec  
 PL1 0.00 dB  
 SFO1 300.1318534 MHz

F2 - Processing parameters  
 SI 32768  
 SF 300.1300359 MHz  
 WDW EM  
 SSB 0  
 LB 0.30 Hz  
 GB 0  
 PC 1.00

<sup>1</sup>H-NMR Spectra of Compound **3g**

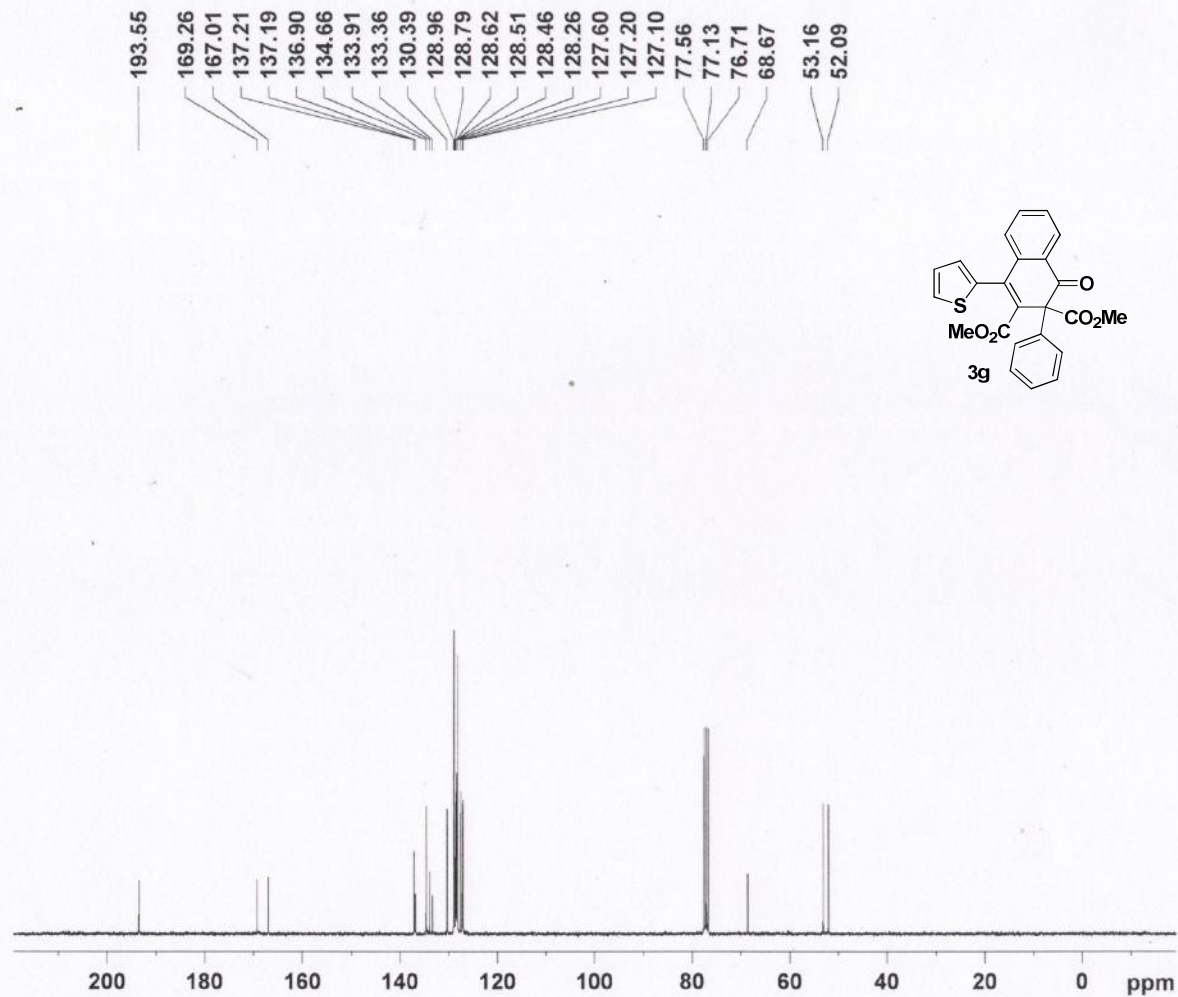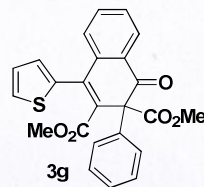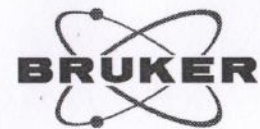

Current Data Parameters  
NAME JK-B-PH-THI-RA  
EXPNO 5  
PROCNO 1

F2 - Acquisition Parameters  
Date\_ 20161107  
Time 20.07  
INSTRUM spect  
PROBHD 5 mm DUL 13C-1  
PULPROG zgpg30  
TD 65536  
SOLVENT CDCl3  
NS 500  
DS 4  
SWH 17985.611 Hz  
FIDRES 0.274439 Hz  
AQ 1.8219508 sec  
RG 574.7  
DW 27.800 usec  
DE 6.00 usec  
TE 300.0 K  
D1 2.00000000 sec  
d11 0.03000000 sec  
DELTA 1.89999998 sec  
TD0 1

===== CHANNEL f1 =====  
NUC1 13C  
P1 10.38 usec  
PL1 0.00 dB  
SFO1 75.4752953 MHz

===== CHANNEL f2 =====  
CPDPRG2 waltz16  
NUC2 1H  
PCPD2 80.00 usec  
PL2 0.00 dB  
PL12 15.21 dB  
PL13 15.00 dB  
SFO2 300.1312005 MHz

F2 - Processing parameters  
SI 32768  
SF 75.4677490 MHz  
WDW EM  
SSB 0  
LB 1.00 Hz  
GB 0  
PC 1.40

<sup>13</sup>C-NMR Spectra of Compound 3g



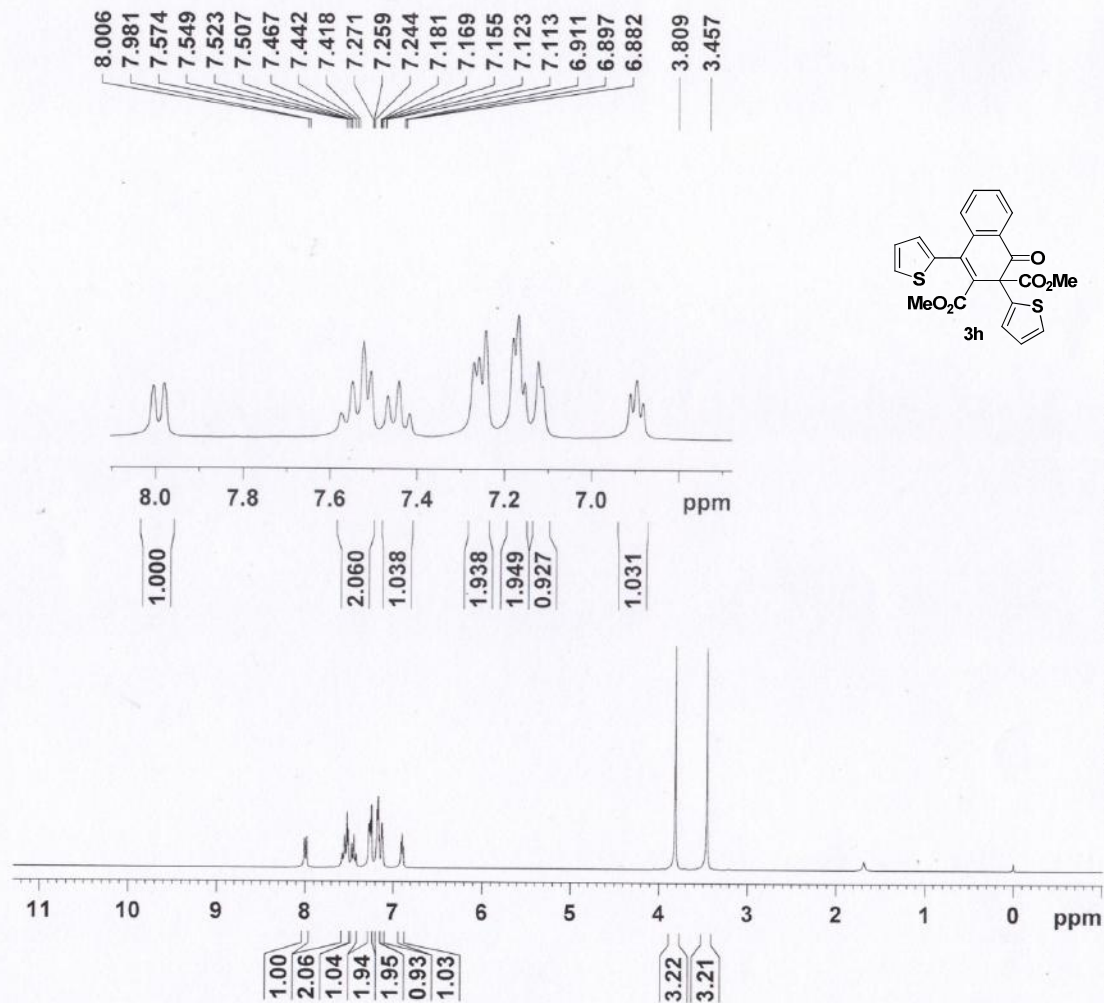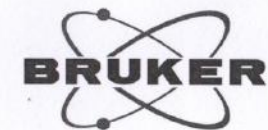

Current Data Parameters  
 NAME SKMN-82Ar  
 EXPNO 2  
 PROCNO 1

F2 - Acquisition Parameters  
 Date\_ 20100823  
 Time 19.45  
 INSTRUM spect  
 PROBHD 5 mm DUL 13C-1  
 PULPROG zg30  
 TD 65536  
 SOLVENT CDCl3  
 NS 16  
 DS 2  
 SWH 6172.839 Hz  
 FIDRES 0.094190 Hz  
 AQ 5.3084660 sec  
 RG 71.8  
 DW 81.000 usec  
 DE 6.00 usec  
 TE 300.0 K  
 D1 1.00000000 sec  
 TD0 1

===== CHANNEL f1 =====  
 NUC1 1H  
 P1 13.15 usec  
 PL1 0.00 dB  
 SFO1 300.1318534 MHz

F2 - Processing parameters  
 SI 32768  
 SF 300.1300070 MHz  
 WDW EM  
 SSB 0  
 LB 0.30 Hz  
 GB 0  
 PC 1.00

<sup>1</sup>H-NMR Spectra of Compound **3h**

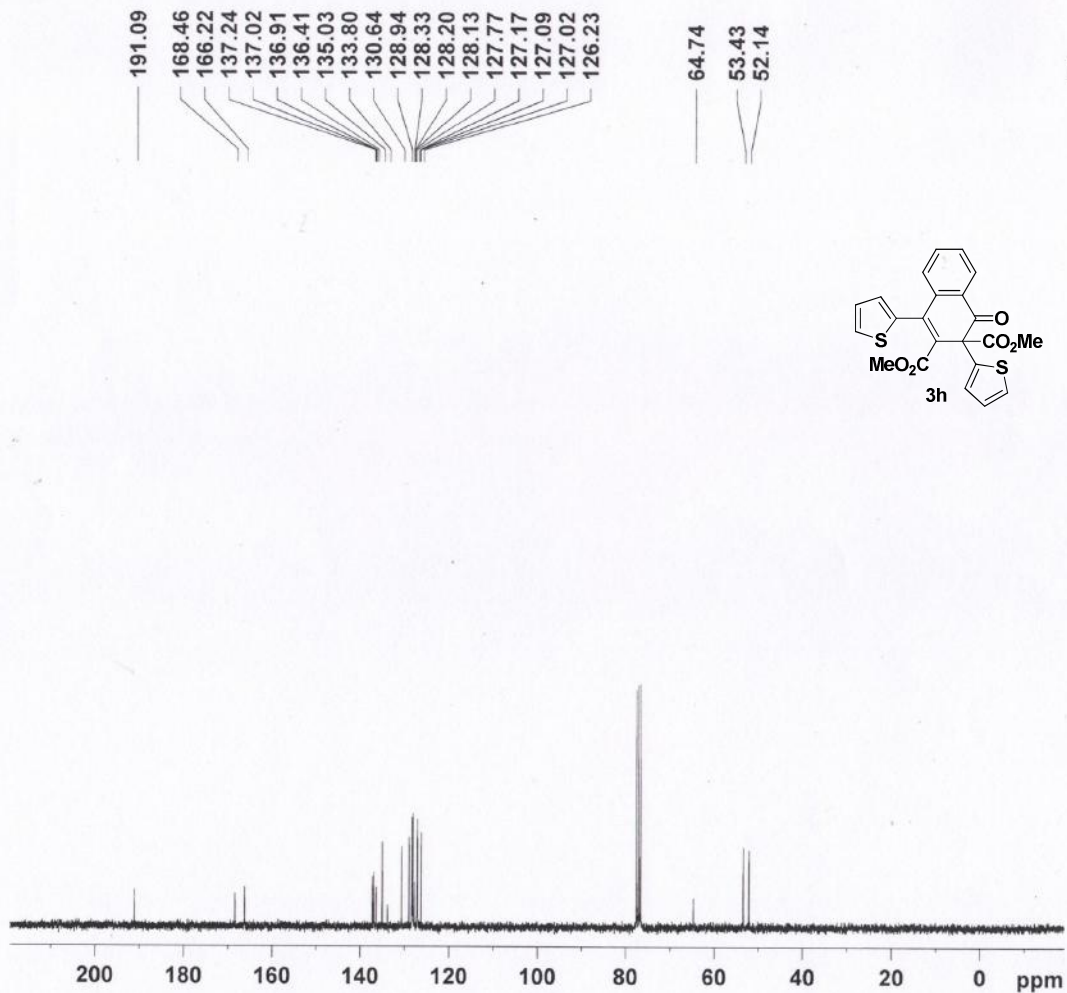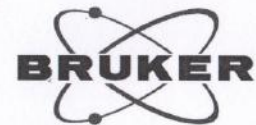

Current Data Parameters  
 NAME SKMN-82Ar  
 EXPNO 3  
 PROCNO 1

F2 - Acquisition Parameters  
 Date\_ 20100823  
 Time 19.51  
 INSTRUM spect  
 PROBHD 5 mm DUL 13C-1  
 PULPROG zgpg30  
 TD 65536  
 SOLVENT CDCl3  
 NS 88  
 DS 4  
 SWH 17985.611 Hz  
 FIDRES 0.274439 Hz  
 AQ 1.8219508 sec  
 RG 362  
 DW 27.800 usec  
 DE 6.00 usec  
 TE 300.0 K  
 D1 2.00000000 sec  
 d11 0.03000000 sec  
 DELTA 1.89999998 sec  
 TDO 1

===== CHANNEL f1 =====  
 NUC1 13C  
 P1 7.40 usec  
 PL1 -2.00 dB  
 SFO1 75.4752953 MHz

===== CHANNEL f2 =====  
 CPDPRG2 waltz16  
 NUC2 1H  
 PCPD2 80.00 usec  
 PL2 0.00 dB  
 PL12 15.68 dB  
 PL13 16.00 dB  
 SFO2 300.1312005 MHz

F2 - Processing parameters  
 SI 32768  
 SF 75.4677490 MHz  
 WDW EM  
 SSB 0  
 LB 1.00 Hz  
 GB 0  
 PC 1.40

<sup>13</sup>C-NMR Spectra of Compound **3h**

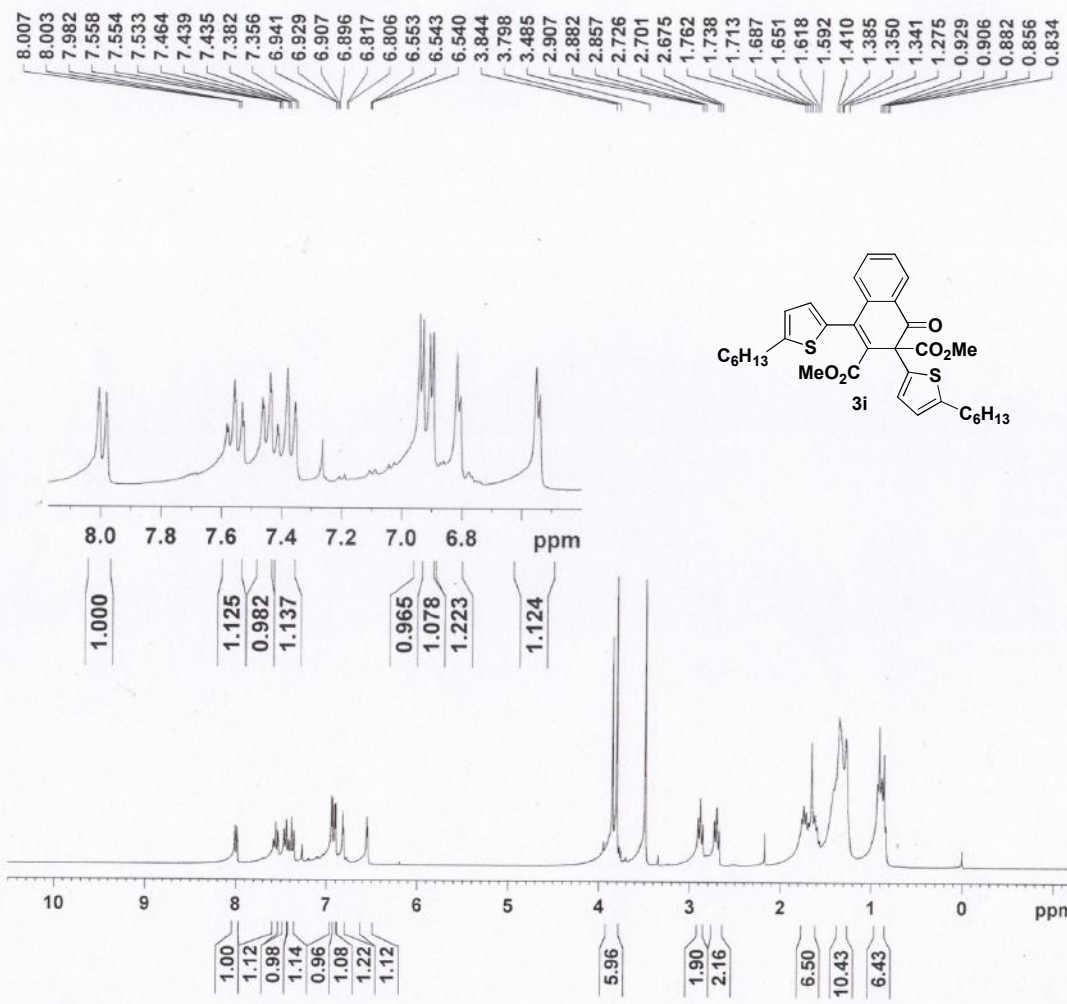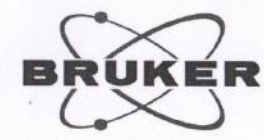

Current Data Parameters  
 NAME SKMN-139A  
 EXPNO 1  
 PROCNO 1

F2 - Acquisition Parameters  
 Date 20100723  
 Time 14.20  
 INSTRUM spect  
 PROBHD 5 mm DUL 13C-1  
 PULPROG zg30  
 TD 65536  
 SOLVENT CDCl3  
 NS 16  
 DS 2  
 SWH 6172.839 Hz  
 FIDRES 0.094190 Hz  
 AQ 5.3084660 sec  
 RG 71.8  
 DW 81.000 usec  
 DE 6.00 usec  
 TE 300.0 K  
 D1 1.00000000 sec  
 TD0 1

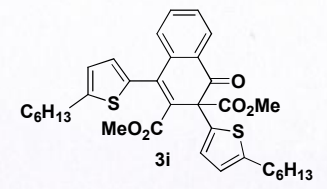

===== CHANNEL f1 =====  
 NUC1 1H  
 P1 13.15 usec  
 PL1 0.00 dB  
 SFO1 300.1318534 MHz

F2 - Processing parameters  
 SI 32758  
 SF 300.1300044 MHz  
 WDW EM  
 SSB 0  
 LB 0.30 Hz  
 GB 0  
 PC 1.00

<sup>1</sup>H-NMR Spectra of Compound 3i

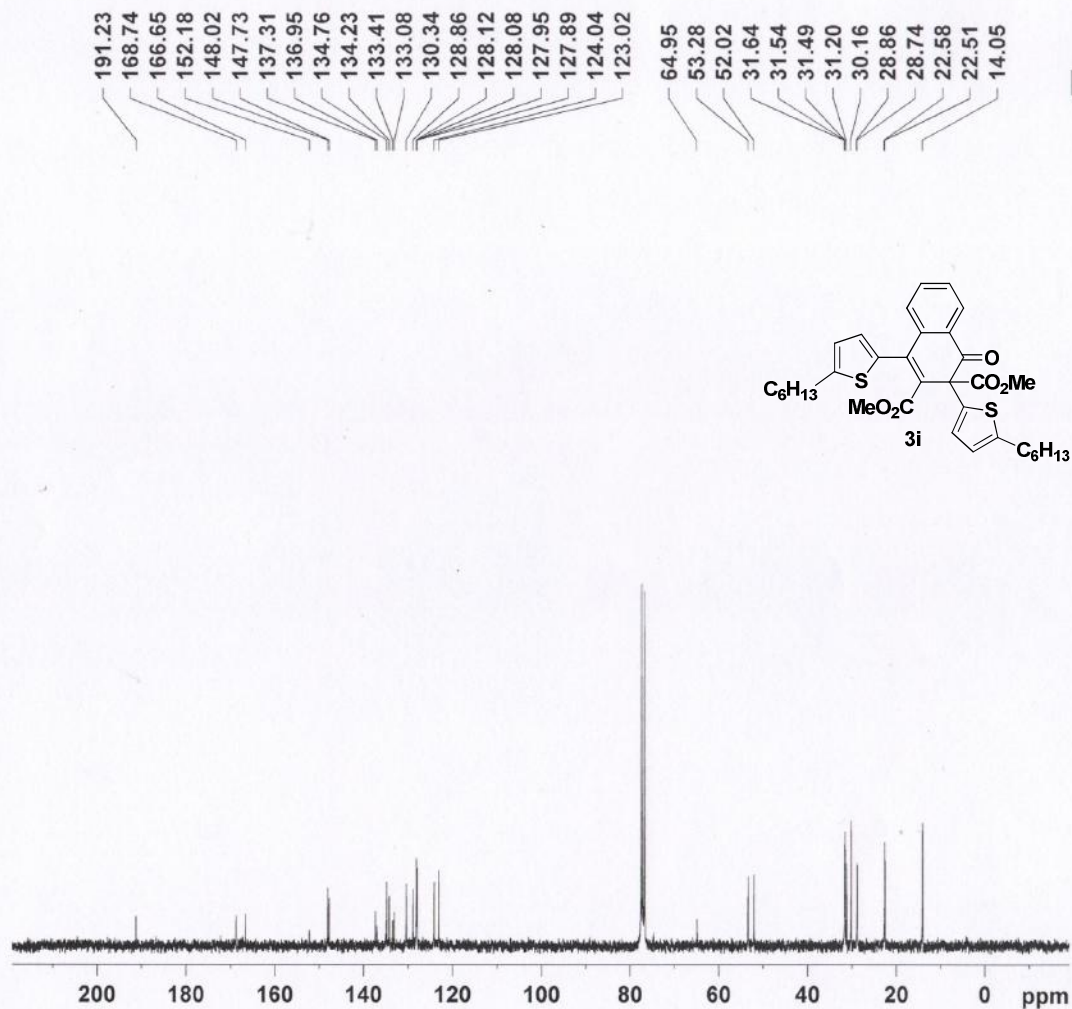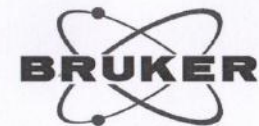

Current Data Parameters  
 NAME SKMN-139A  
 EXPNO 2  
 PROCNO 1

F2 - Acquisition Parameters  
 Date\_ 20100723  
 Time 14.53  
 INSTRUM spect  
 PROBHD 5 mm DUL 13C-1  
 PULPROG zgpg30  
 TD 65536  
 SOLVENT CDCl3  
 NS 500  
 DS .4  
 SWH 17985.611 Hz  
 FIDRES 0.274439 Hz  
 AQ 1.8219508 sec  
 RG 574.7  
 DW 27.800 usec  
 DE 6.00 usec  
 TE 300.0 K  
 D1 2.00000000 sec  
 d11 0.03000000 sec  
 DELTA 1.89999998 sec  
 TDO 1

===== CHANNEL f1 =====  
 NUC1 <sup>13</sup>C  
 P1 7.40 usec  
 PL1 -2.00 dB  
 SFO1 75.4752953 MHz

===== CHANNEL f2 =====  
 CPDPRG2 waltz16  
 NUC2 <sup>1</sup>H  
 PCPD2 80.00 usec  
 PL2 0.00 dB  
 PL12 15.68 dB  
 PL13 16.00 dB  
 SFO2 300.1312005 MHz

F2 - Processing parameters  
 SI 32768  
 SF 75.4677490 MHz  
 WDW EM  
 SSB 0  
 LB 1.00 Hz

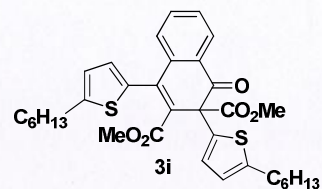

<sup>13</sup>C-NMR Spectra of Compound 3i



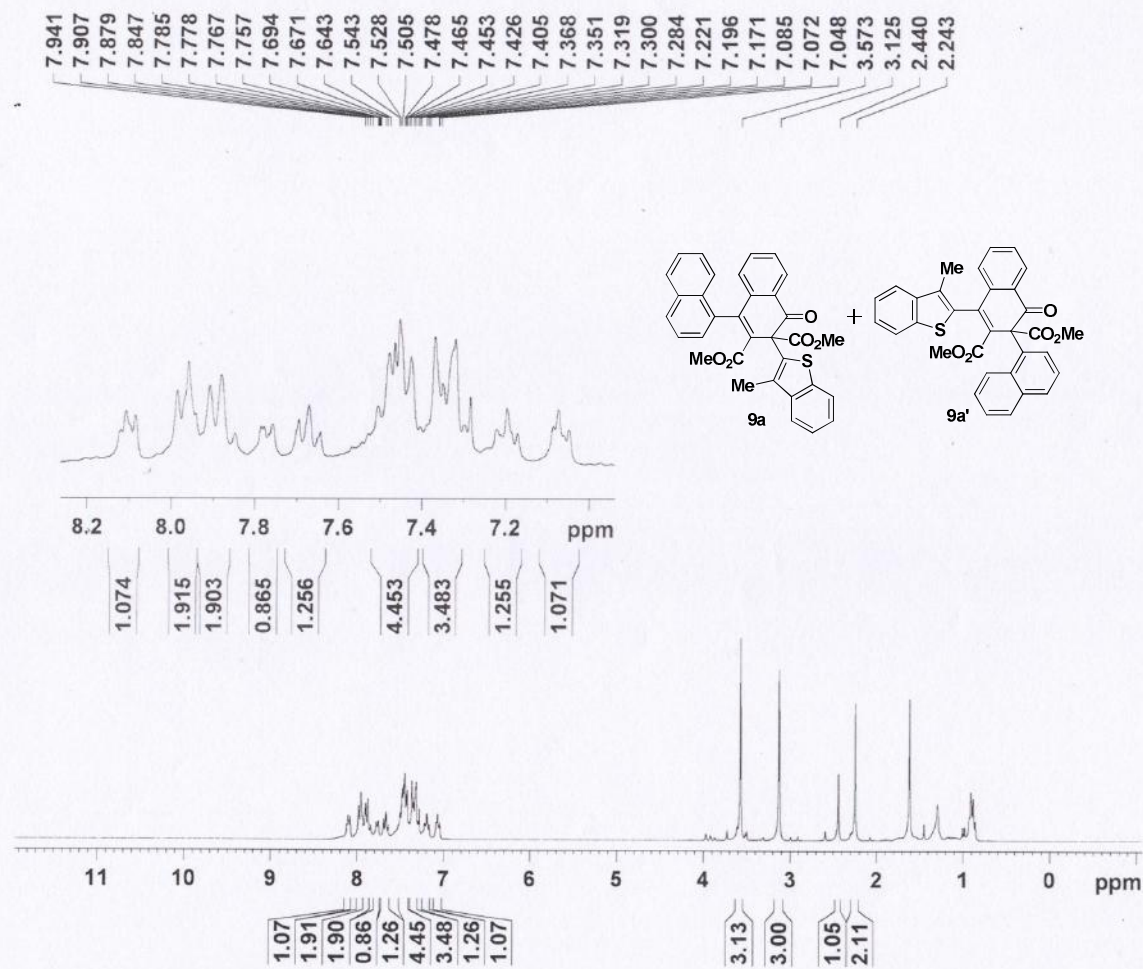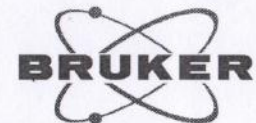

Current Data Parameters

NAME JK-B-66A  
EXPNO 1  
PROCNO 1

F2 - Acquisition Parameters

Date 20150418  
Time 22.31  
INSTRUM spect  
PROBHD 5 mm DUL 13C-1  
PULPROG zg30  
TD 65536  
SOLVENT CDCl3  
NS 13  
DS 2  
SWH 6172.839 Hz  
FIDRES 0.094190 Hz  
AQ 5.3084660 sec  
RG 203.2  
DW 81.000 usec  
DE 6.00 usec  
TE 300.0 K  
D1 1.00000000 sec  
TDO 1

===== CHANNEL f1 =====

NUC1 1H  
P1 13.15 usec  
PL1 0.00 dB  
SFO1 300.1318534 MHz

F2 - Processing parameters

SI 32768  
SF 300.1300000 MHz  
WDW EM  
SSB 0  
LB 0.30 Hz  
GB 0  
PC 1.00

<sup>1</sup>H-NMR Spectra of Compound 9a & 9a'

UNIV. OF MADRAS

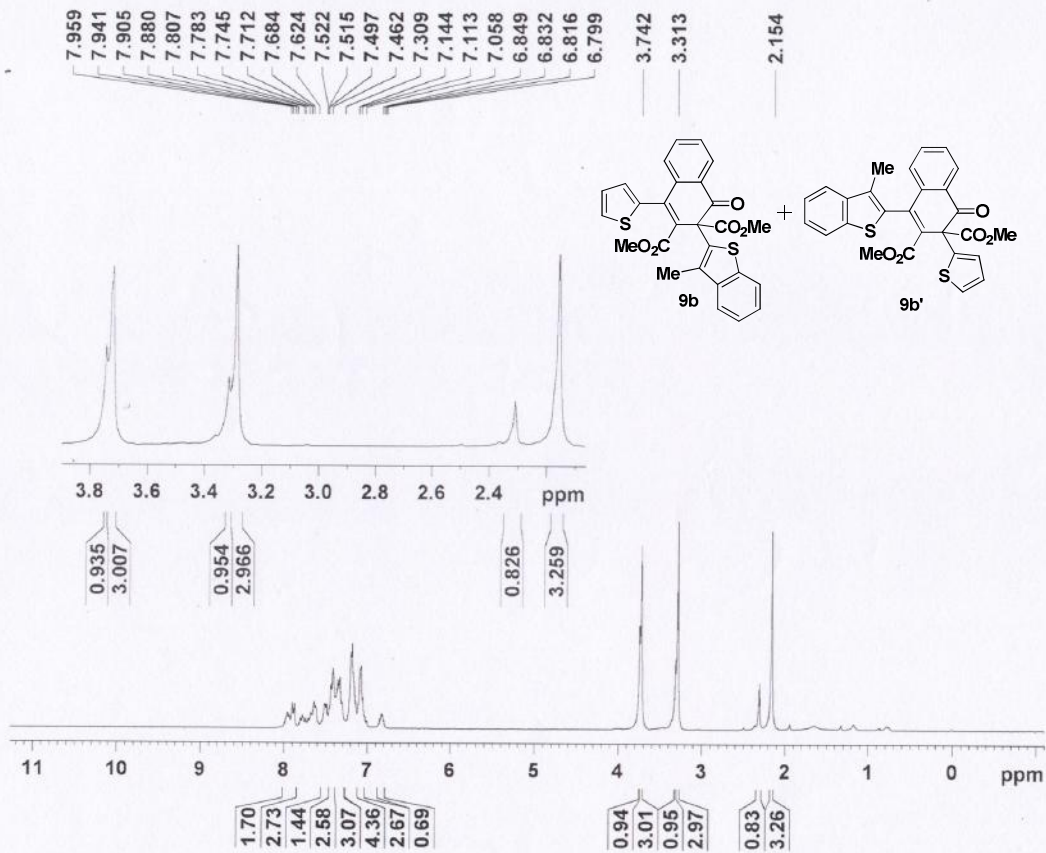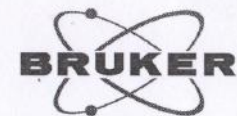

Current Data Parameters  
 NAME JK-B-63  
 EXPNO 1  
 PROCNO 1

F2 - Acquisition Parameters  
 Date 20160417  
 Time 11.32  
 INSTRUM spect  
 PROBHD 5 mm DUL 13C-1  
 PULPROG zg30  
 TD 65636  
 SOLVENT CDCl3  
 NS 16  
 DS 2  
 SWH 6172.839 Hz  
 FIDRES 0.094190 Hz  
 AQ 5.3084660 sec  
 RG 45.3  
 DW 81.000 usec  
 DE 6.00 usec  
 TE 300.0 K  
 D1 1.00000000 sec  
 TD0 1

===== CHANNEL f1 =====  
 NUC1 1H  
 P1 13.15 usec  
 PL1 0.00 dB  
 SFO1 300.1318534 MHz

F2 - Processing parameters  
 SI 32768  
 SF 300.1300420 MHz  
 WDW EM  
 SSB 0  
 LB 0.30 Hz  
 GB 0  
 PC 1.00

<sup>1</sup>H-NMR Spectra of Compound **9b** & **9b'**

UNIV. OF MADRAS

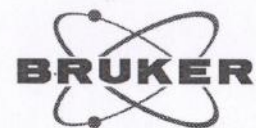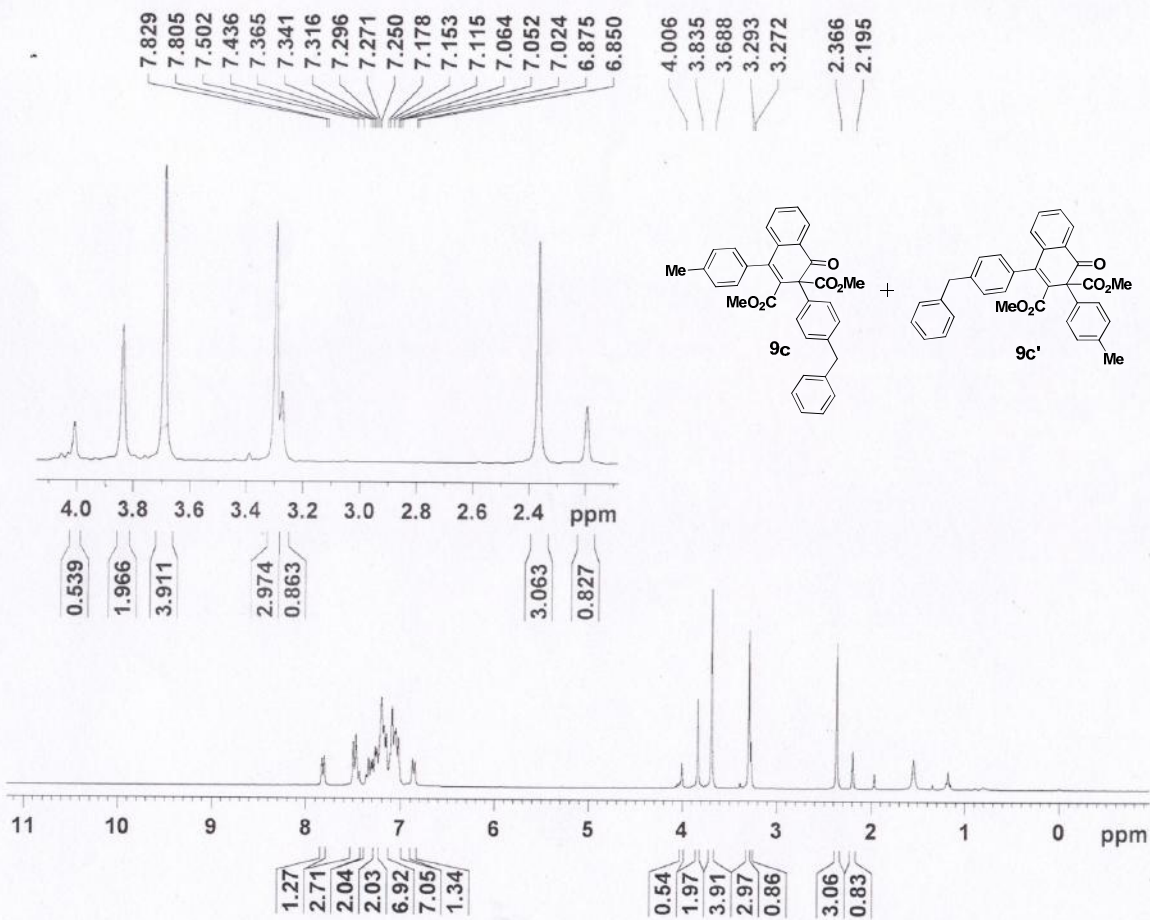

Current Data Parameters  
NAME JK-B-66  
EXPNO 1  
PROCNO 1

F2 - Acquisition Parameters  
Date\_ 20150406  
Time 11.32  
INSTRUM spect  
PROBHD 5 mm DUL 13C-1  
PULPROG zg30  
TD 65536  
SOLVENT CDCl3  
NS 16  
DS 2  
SWH 6172.839 Hz  
FIDRES 0.094180 Hz  
AQ 5.3084660 sec  
RG 101.6  
DW 81.000 usec  
DE 6.00 usec  
TE 300.0 K  
D1 1.00000000 sec  
TD0 1

==== CHANNEL f1 =====  
NUC1 1H  
P1 13.15 usec  
PL1 0.00 dB  
SFO1 300.1318534 MHz

F2 - Processing parameters  
SI 32768  
SF 300.1300343 MHz  
WDW EM  
SSB 0  
LB 0.30 Hz  
GB 0  
PC 1.00

<sup>1</sup>H-NMR Spectra of Compound 9c & 9c'

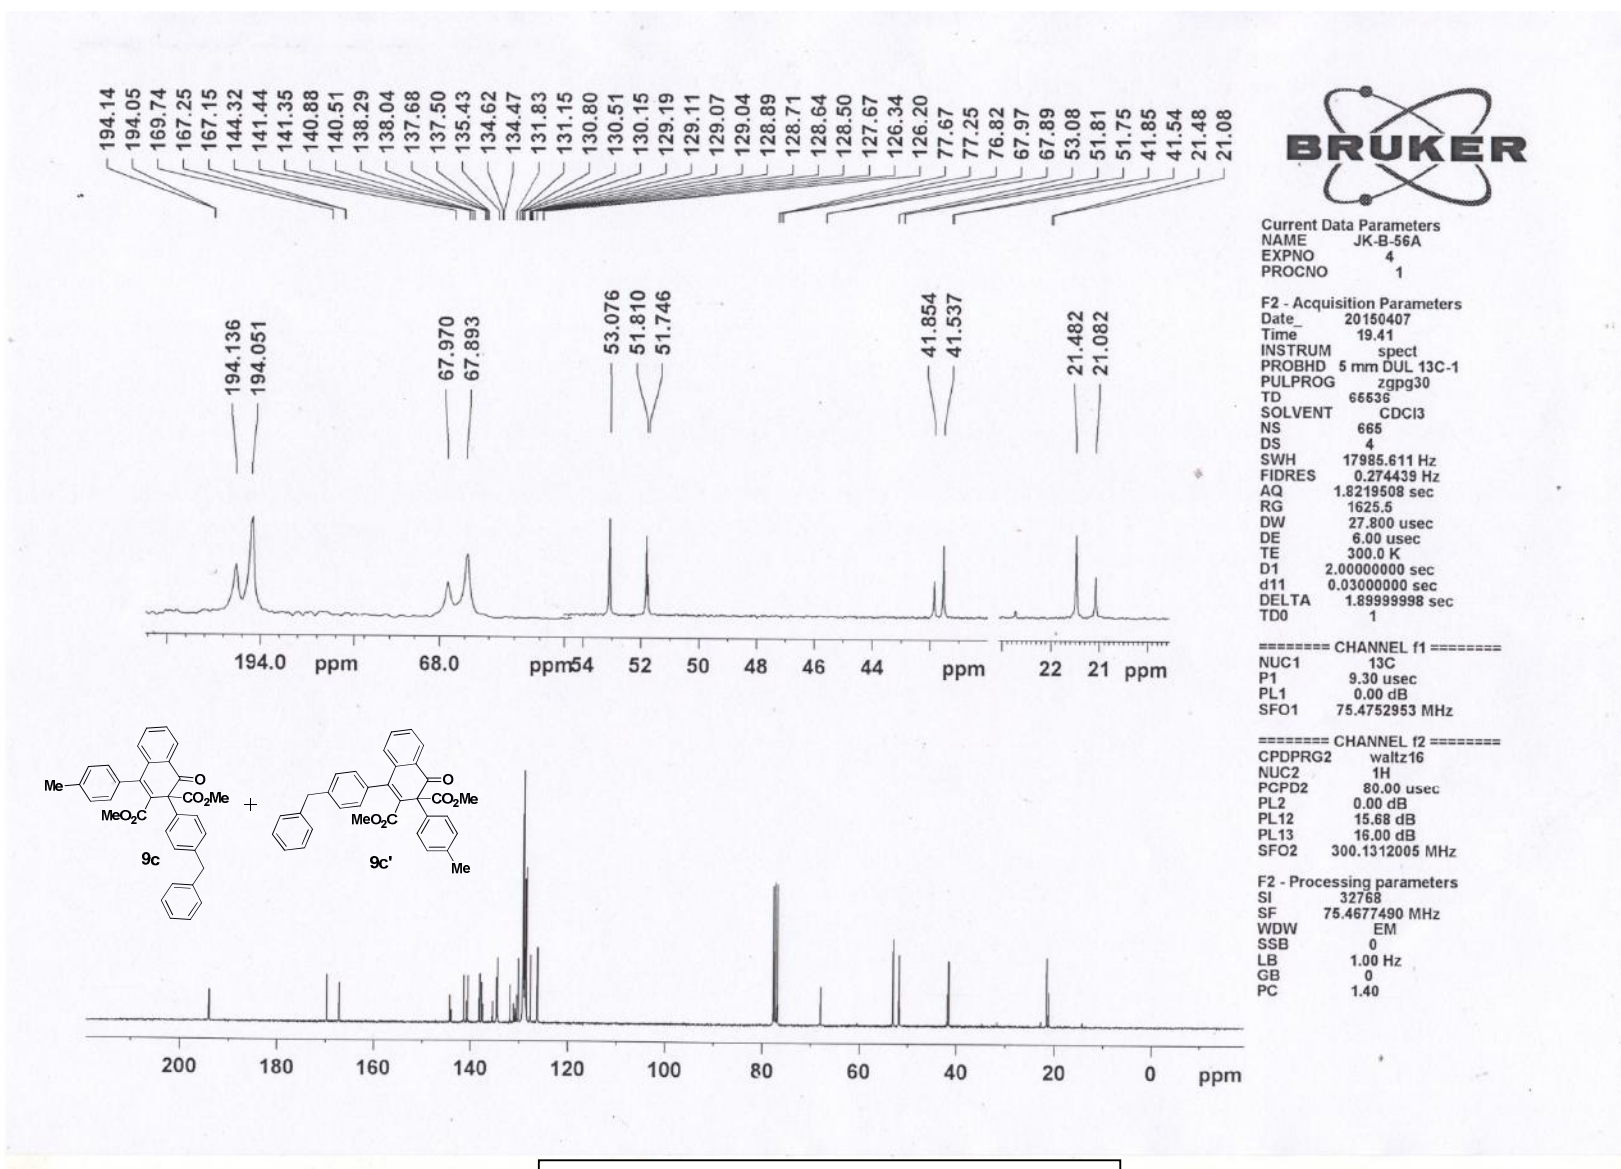

**<sup>13</sup>C-NMR Spectra of Compound 9c & 9c'**



UNIV. OF MADRAS

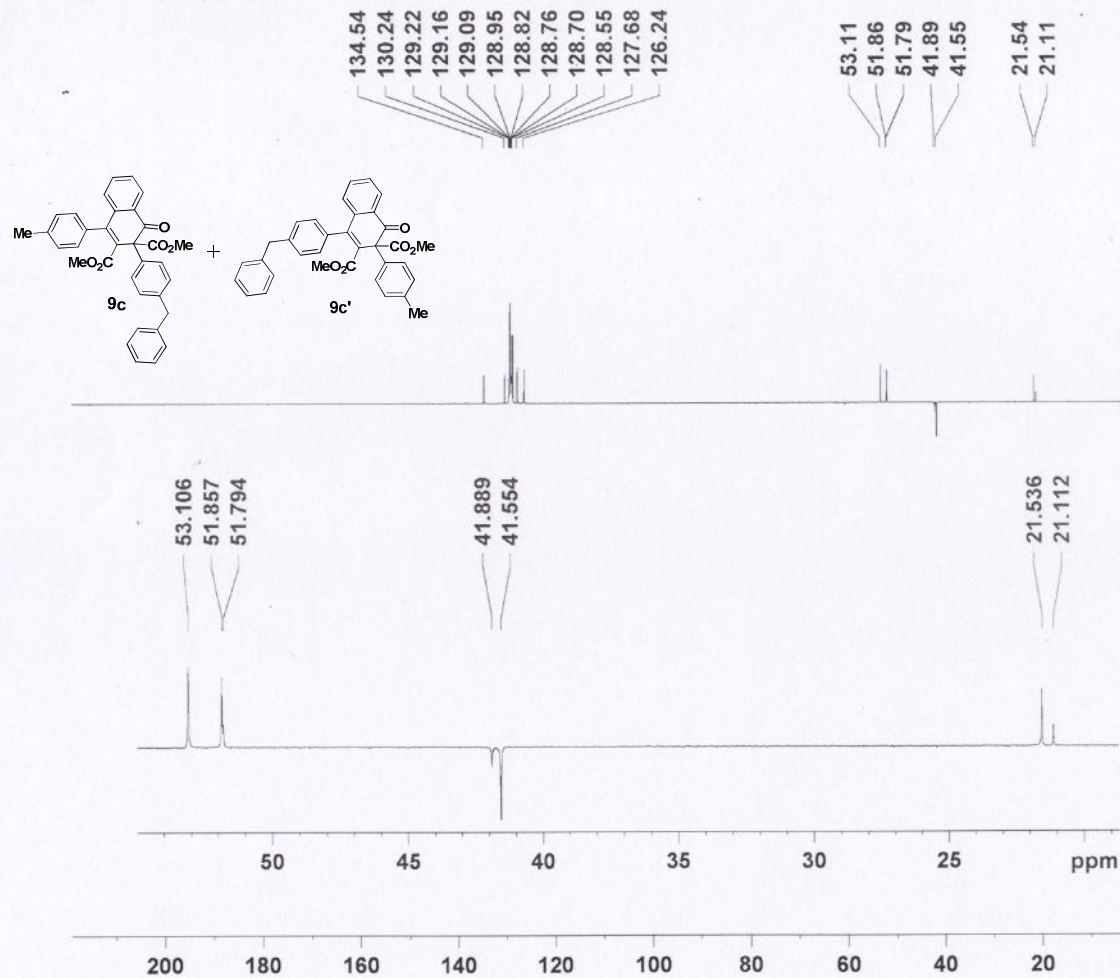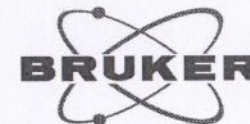

Current Data Parameters  
 NAME JK-B-86  
 EXPNO 2  
 PROCNO 1

F2 - Acquisition Parameters  
 Date\_ 20150406  
 Time 13.01  
 INSTRUM spect  
 PROBHD 5 mm DUL 13C-1  
 PULPROG dept135  
 TD 65536  
 SOLVENT CDCl3  
 NS 256  
 DS 4  
 SWH 17985.611 Hz  
 FIDRES 0.274439 Hz  
 AQ 1.8219508 sec  
 RG 16384  
 DW 27.800 usec  
 DE 6.00 usec  
 TE 300.0 K  
 CNST2 145.0000000  
 D1 2.00000000 sec  
 d2 0.00344828 sec  
 d12 0.00002000 sec  
 DELTA 0.00001184 sec  
 TD0 1

===== CHANNEL f1 =====  
 NUC1 13C  
 P1 9.30 usec  
 p2 18.60 usec  
 PL1 0.00 dB  
 SFO1 75.4752953 MHz

===== CHANNEL f2 =====  
 CPDPRG2 waltz16  
 NUC2 1H  
 P3 13.15 usec  
 p4 26.30 usec  
 PCPD2 80.00 usec  
 PL2 0.00 dB  
 PL12 15.68 dB  
 SFO2 300.1312005 MHz

F2 - Processing parameters  
 SI 32768  
 SF 75.4677490 MHz  
 WDW EM  
 SSB 0  
 LB 1.00 Hz  
 GB 0  
 PC 1.40

DEPT-135 NMR Spectra of Compound **9c** & **9c'**

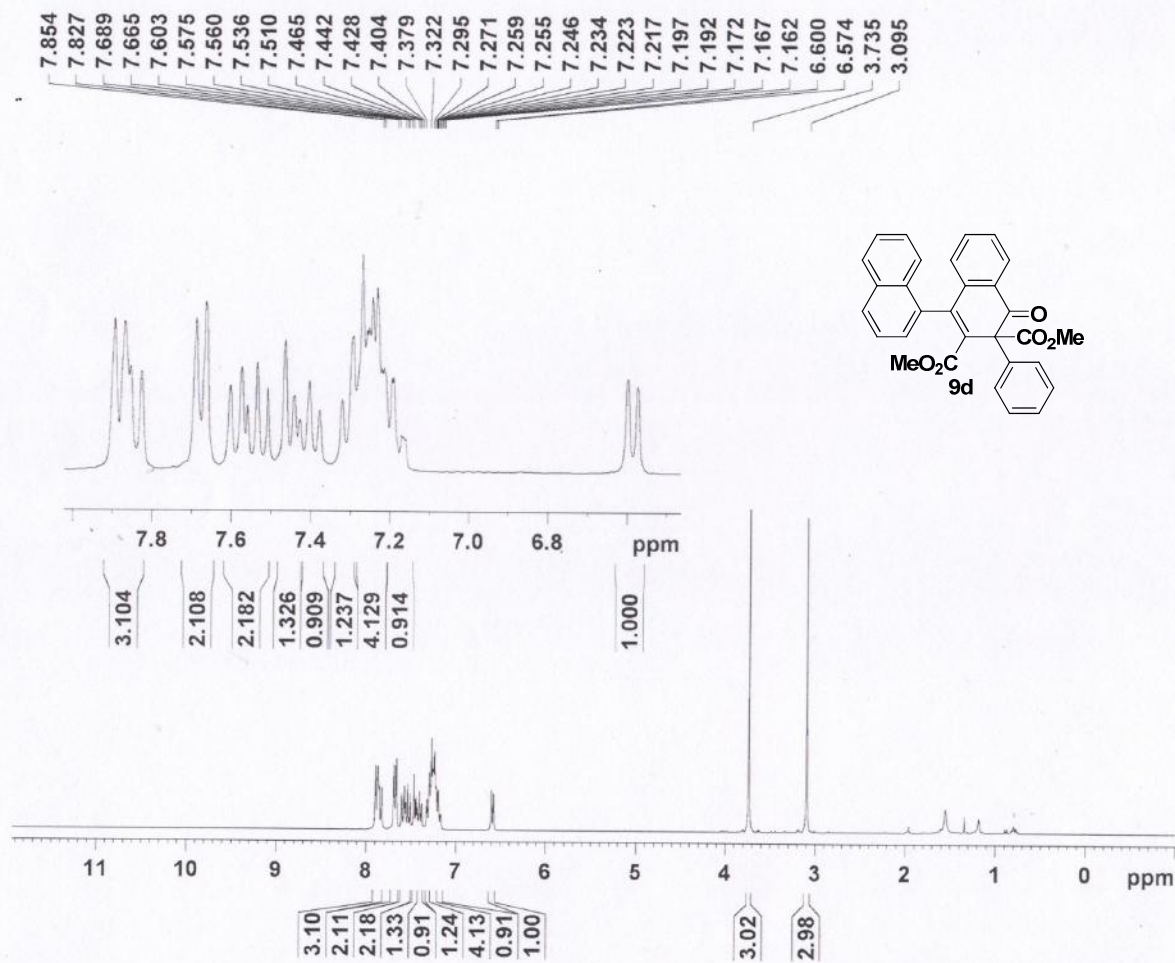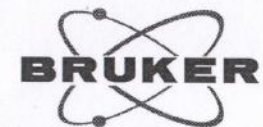

Current Data Parameters  
NAME JK-B-PHE-NAPH-RA  
EXPNO 1  
PROCNO 1

F2 - Acquisition Parameters  
Date 20161109  
Time 0.57  
INSTRUM spect  
PROBHD 5 mm DUL 13C-1  
PULPROG zg30  
TD 65536  
SOLVENT CDCl<sub>3</sub>  
NS 16  
DS 2  
SWH 6172.839 Hz  
FIDRES 0.094190 Hz  
AQ 5.3084660 sec  
RG 71.8  
DW 81.000 usec  
DE 6.00 usec  
TE 300.0 K  
D1 1.00000000 sec  
TD0 1

===== CHANNEL f1 =====  
NUC1 1H  
P1 13.88 usec  
PL1 0.00 dB  
SFO1 300.1318534 MHz

F2 - Processing parameters  
SI 32768  
SF 300.1300356 MHz  
WDW EM  
SSB 0  
LB 0.30 Hz  
GB 0  
PC 1.00

<sup>1</sup>H-NMR Spectra of Compound 9d

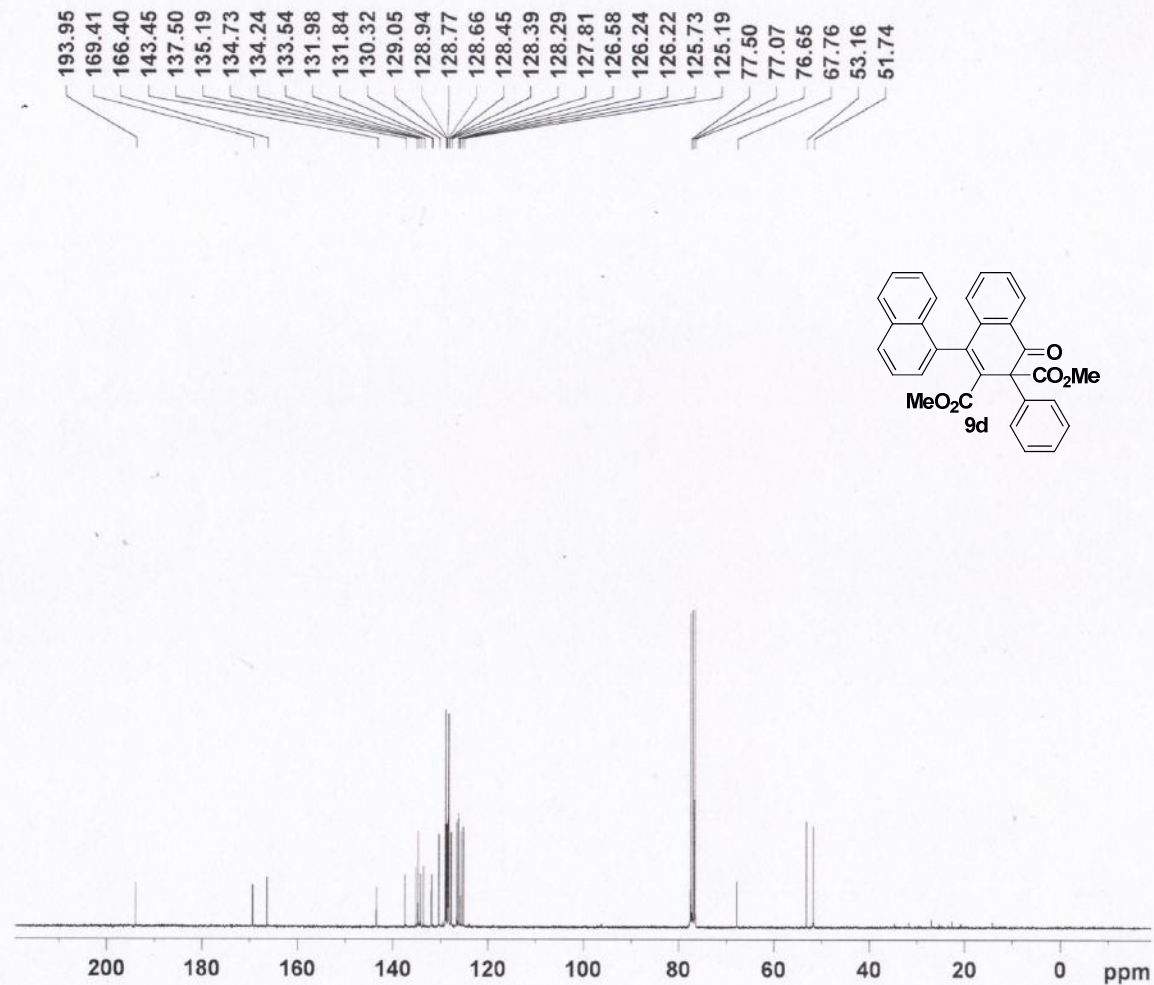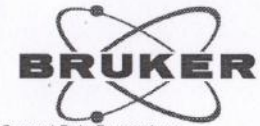

Current Data Parameters  
 NAME JK-B-PHE-NAPH-RA  
 EXPNO 3  
 PROCNO 1

F2 - Acquisition Parameters  
 Date\_ 20161109  
 Time 3.42  
 INSTRUM spect  
 PROBHD 5 mm DUL 13C-1  
 PULPROG zgpg30  
 TD 65536  
 SOLVENT CDCl3  
 NS 2000  
 DS 4  
 SWH 17985.611 Hz  
 FIDRES 0.274439 Hz  
 AQ 1.8219508 sec  
 RG 512  
 DW 27.800 usec  
 DE 6.00 usec  
 TE 300.0 K  
 D1 2.00000000 sec  
 d11 0.03000000 sec  
 DELTA 1.89999998 sec  
 TD0 1

===== CHANNEL f1 =====  
 NUC1 13C  
 P1 10.38 usec  
 PL1 0.00 dB  
 SFO1 75.4752953 MHz

===== CHANNEL f2 =====  
 CPDPRG2 waitz16  
 NUC2 1H  
 PCPD2 80.00 usec  
 PL2 0.00 dB  
 PL12 15.21 dB  
 PL13 16.00 dB  
 SFO2 300.1312005 MHz

F2 - Processing parameters  
 SI 32768  
 SF 75.4677480 MHz  
 WDW EM  
 SSB 0  
 LB 1.00 Hz  
 GB 0  
 PC 1.40

<sup>13</sup>C-NMR Spectra of Compound **9d**

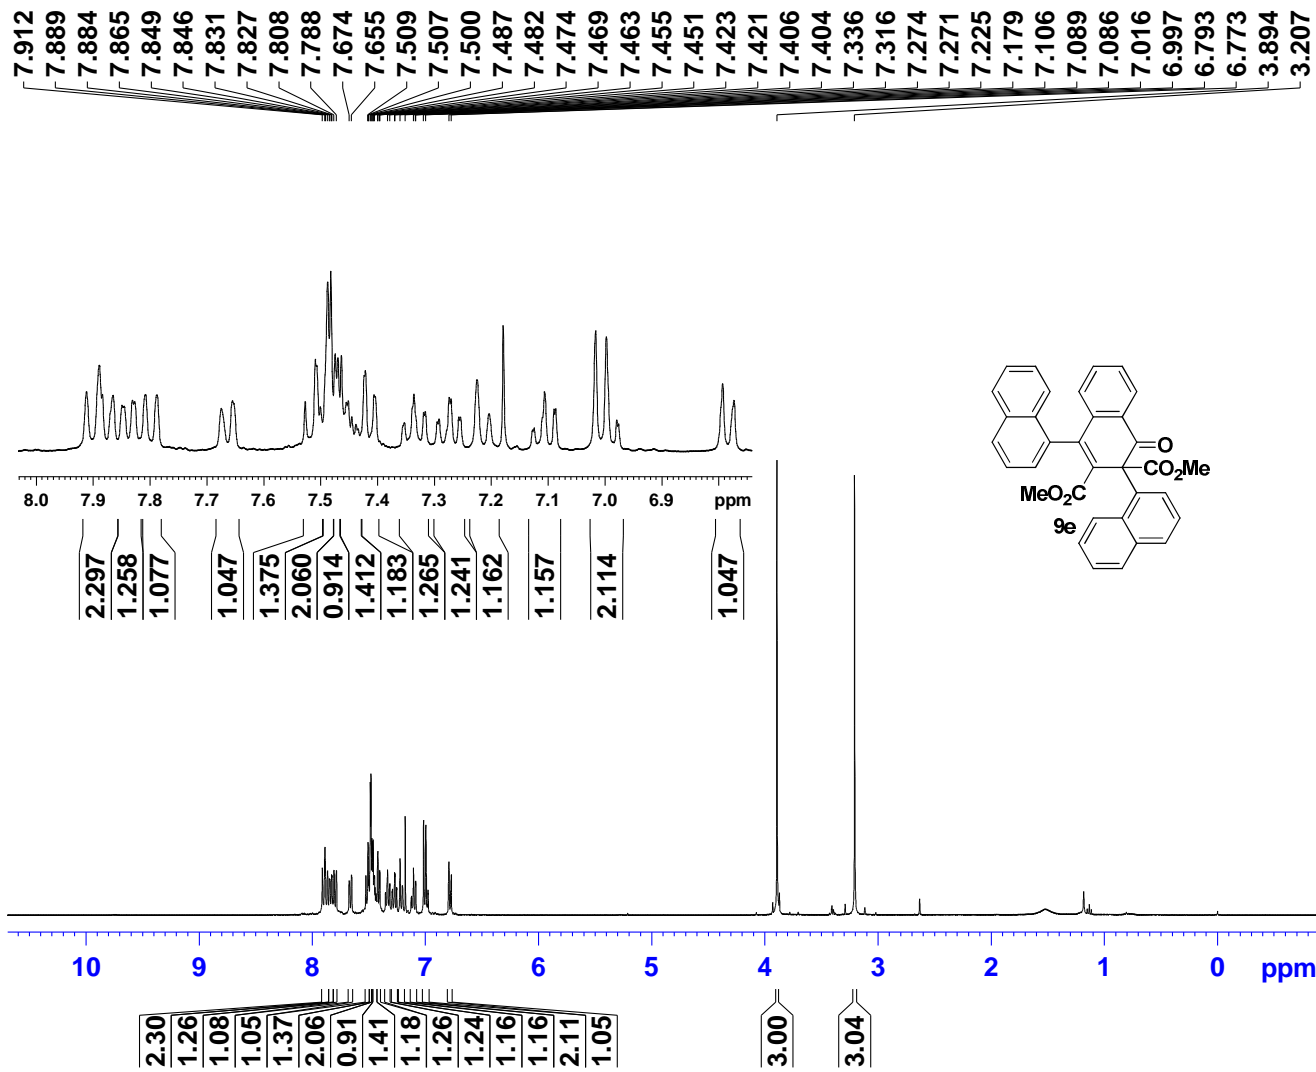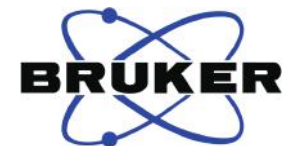

Current Data Parameters  
 NAME JK-B-NAP-RA  
 EXPNO 18  
 PROCNO 1

F2 - Acquisition Parameters  
 Date\_ 20160118  
 Time 15.28  
 INSTRUM spect  
 PROBHD 5 mm PABBO BB/  
 PULPROG zg30  
 TD 65536  
 SOLVENT CDCl3  
 NS 16  
 DS 2  
 SWH 8223.685 Hz  
 FIDRES 0.125483 Hz  
 AQ 3.9845889 sec  
 RG 143.73  
 DW 60.800 usec  
 DE 6.50 usec  
 TE 298.4 K  
 D1 1.0000000 sec  
 TD0 1

===== CHANNEL f1 =====  
 NUC1 1H  
 P1 14.25 usec  
 PLW1 14.0000000 W  
 SFO1 400.2604718 MHz

F2 - Processing parameters  
 SI 65536  
 SF 400.2580442 MHz  
 WDW EM  
 SSB 0  
 LB 0.30 Hz  
 GB 0  
 PC 1.00

<sup>1</sup>H-NMR Spectra of Compound 9e



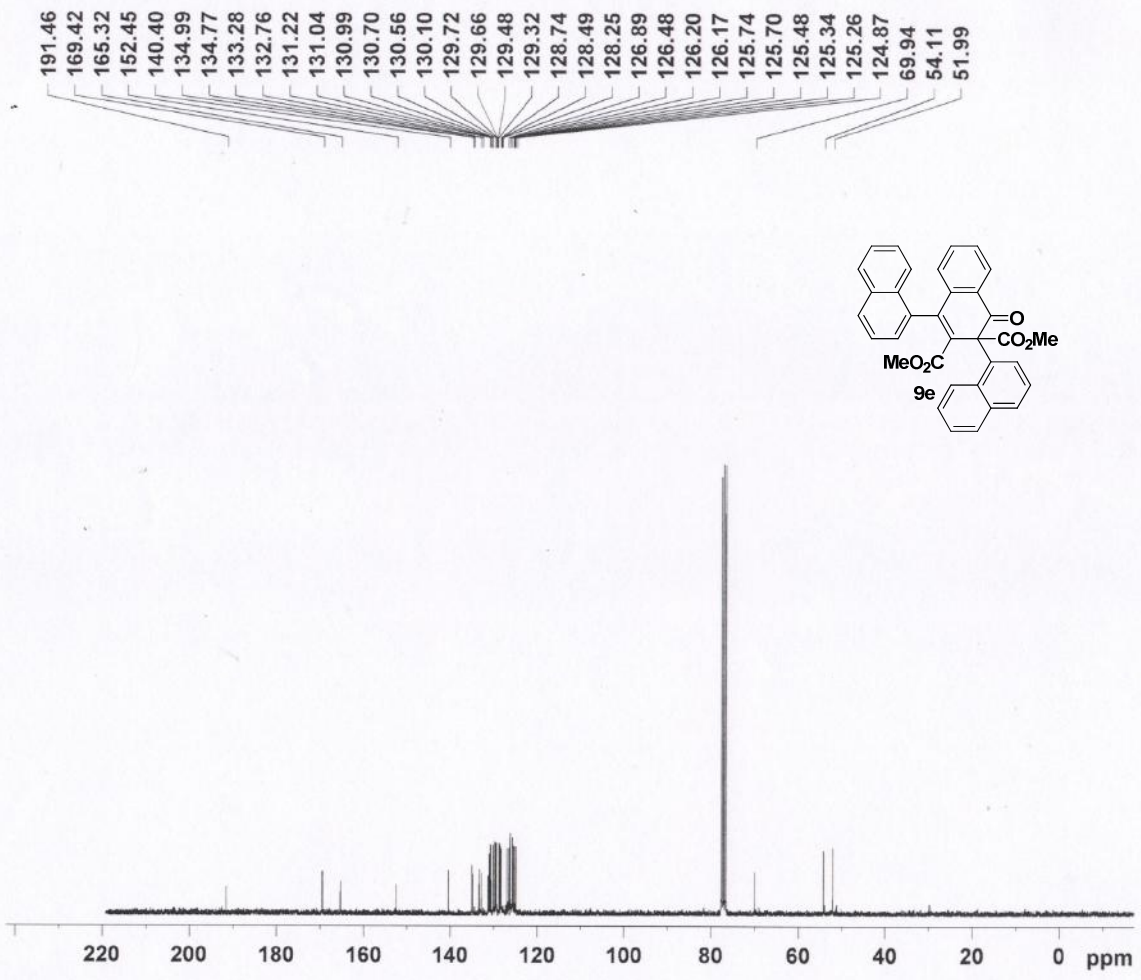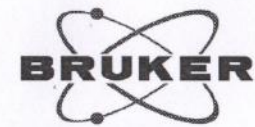

Current Data Parameters  
 NAME JK-B-NAPH-RA  
 EXPNO 2  
 PROCNO 1

F2 - Acquisition Parameters  
 Date 20161107  
 Time 18.25  
 INSTRUM spect  
 PROBHD 5 mm DUL 13C-1  
 PULPROG zgpg30  
 TD 65536  
 SOLVENT CDCl3  
 NS 500  
 DS 4  
 SWH 17985.611 Hz  
 FIDRES 0.274439 Hz  
 AQ 1.8219508 sec  
 RG 724.1  
 DW 27.800 usec  
 DE 6.00 usec  
 TE 300.0 K  
 D1 2.00000000 sec  
 d11 0.03000000 sec  
 DELTA 1.89999998 sec  
 TD0 1

===== CHANNEL f1 =====  
 NUC1 13C  
 P1 10.38 usec  
 PL1 0.00 dB  
 SFO1 75.4752953 MHz

===== CHANNEL f2 =====  
 CPDPRG2 waltz16  
 NUC2 1H  
 PCPD2 80.00 usec  
 PL2 0.00 dB  
 PL12 15.21 dB  
 PL13 16.00 dB  
 SFO2 300.1312005 MHz

F2 - Processing parameters  
 SI 32788  
 SF 75.4677490 MHz  
 WDW EM  
 SSB 0  
 LB 1.00 Hz  
 GB 0  
 PC 1.40

<sup>13</sup>C-NMR Spectra of Compound 9e

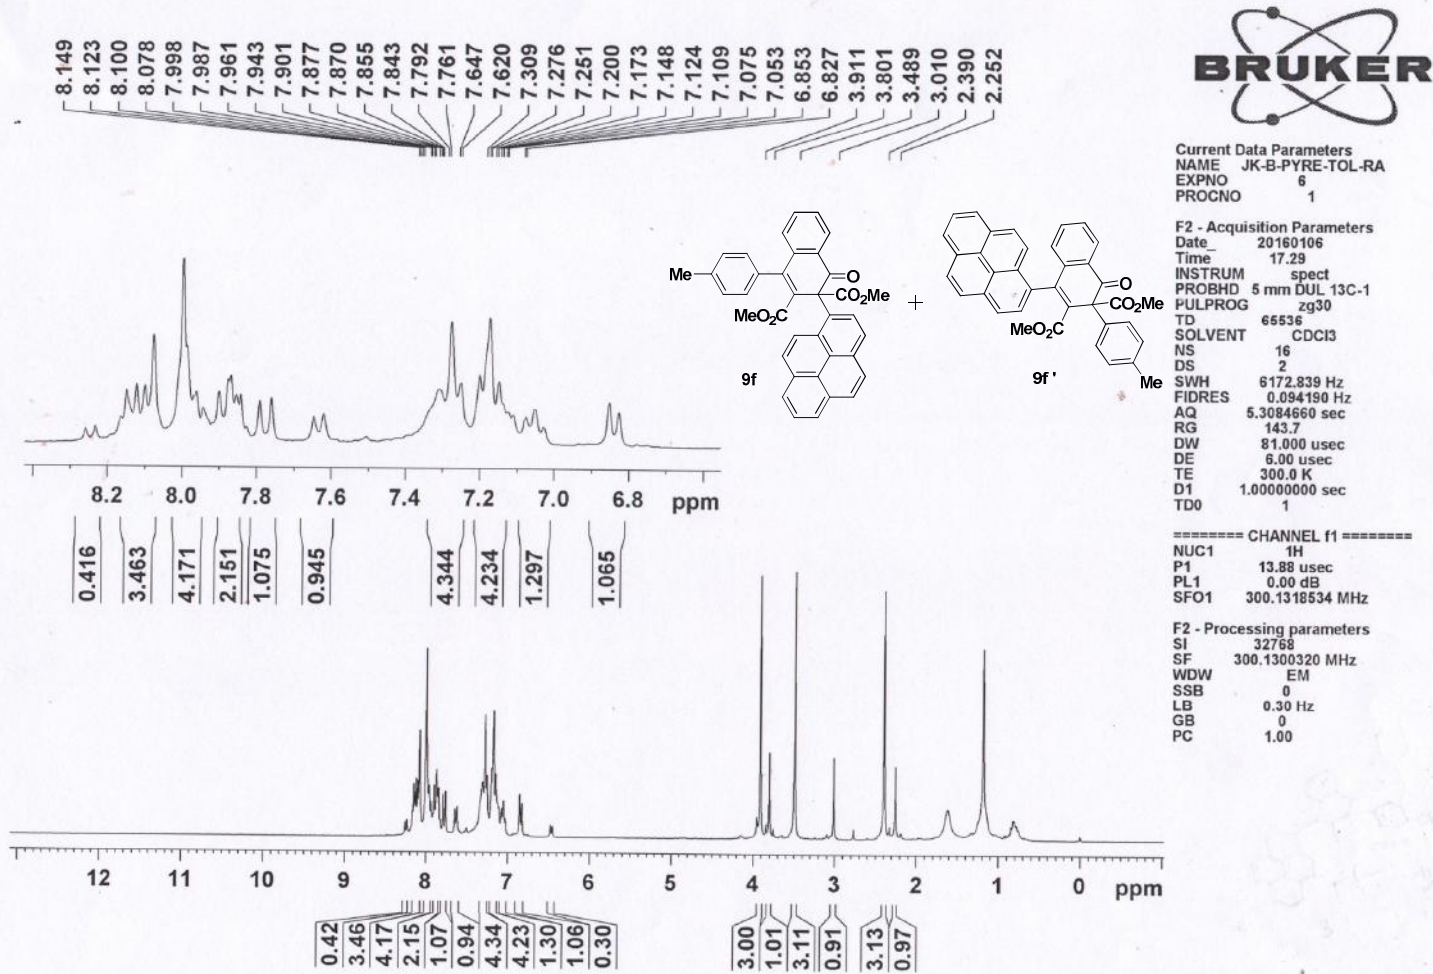

<sup>1</sup>H-NMR Spectra of Compound **9f** & **9f'**

192.95  
190.93  
168.79  
168.52  
166.39  
164.75  
152.12  
142.63  
140.30  
138.19  
137.35  
136.94  
133.65  
131.26  
131.05  
130.68  
130.26  
130.13  
129.81  
129.28  
129.20  
128.93  
128.85  
128.20  
128.14  
127.81  
127.67  
127.44  
127.15  
127.04  
127.00  
126.93  
126.88  
126.83  
126.76  
126.58  
126.28  
125.64  
125.26  
125.10  
125.04  
124.63  
124.47  
123.96  
123.76  
123.60  
123.49  
123.36  
69.53  
66.44  
53.12  
52.18  
51.23  
50.73

20.45  
20.08

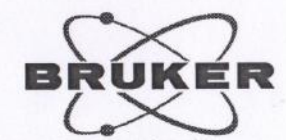

Current Data Parameters  
 NAME JK-B-PYRENE-TOL-RA  
 EXPNO 2  
 PROCNO 1

F2 - Acquisition Parameters  
 Date\_ 20160107  
 Time 0.12  
 INSTRUM spect  
 PROBHD 5 mm DUL 13C-1  
 PULPROG zgpg30  
 TD 66636  
 SOLVENT CDCl3  
 NS 1500  
 DS 4  
 SWH 17985.611 Hz  
 FIDRES 0.274439 Hz  
 AQ 1.8219508 sec  
 RG 18390.4  
 DW 27.800 usec  
 DE 6.00 usec  
 TE 300.0 K  
 D1 2.00000000 sec  
 d11 0.03000000 sec  
 DELTA 1.89999998 sec  
 TD0 1

===== CHANNEL f1 =====  
 NUC1 13C  
 P1 10.38 usec  
 PL1 0.00 dB  
 SFO1 75.4752953 MHz

===== CHANNEL f2 =====  
 CPDPRG2 waltz16  
 NUC2 1H  
 PCPD2 80.00 usec  
 PL2 0.00 dB  
 PL12 15.21 dB  
 PL13 16.00 dB  
 SFO2 300.1312005 MHz

F2 - Processing parameters  
 SI 32768  
 SF 75.4677490 MHz  
 WDW EM  
 SSB 0  
 LB 1.00 Hz  
 GB 0  
 PC 1.40

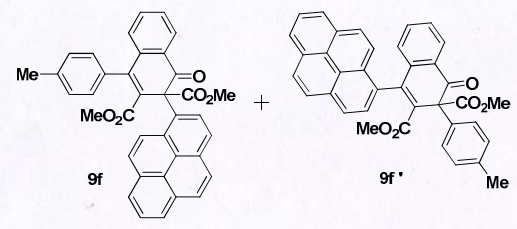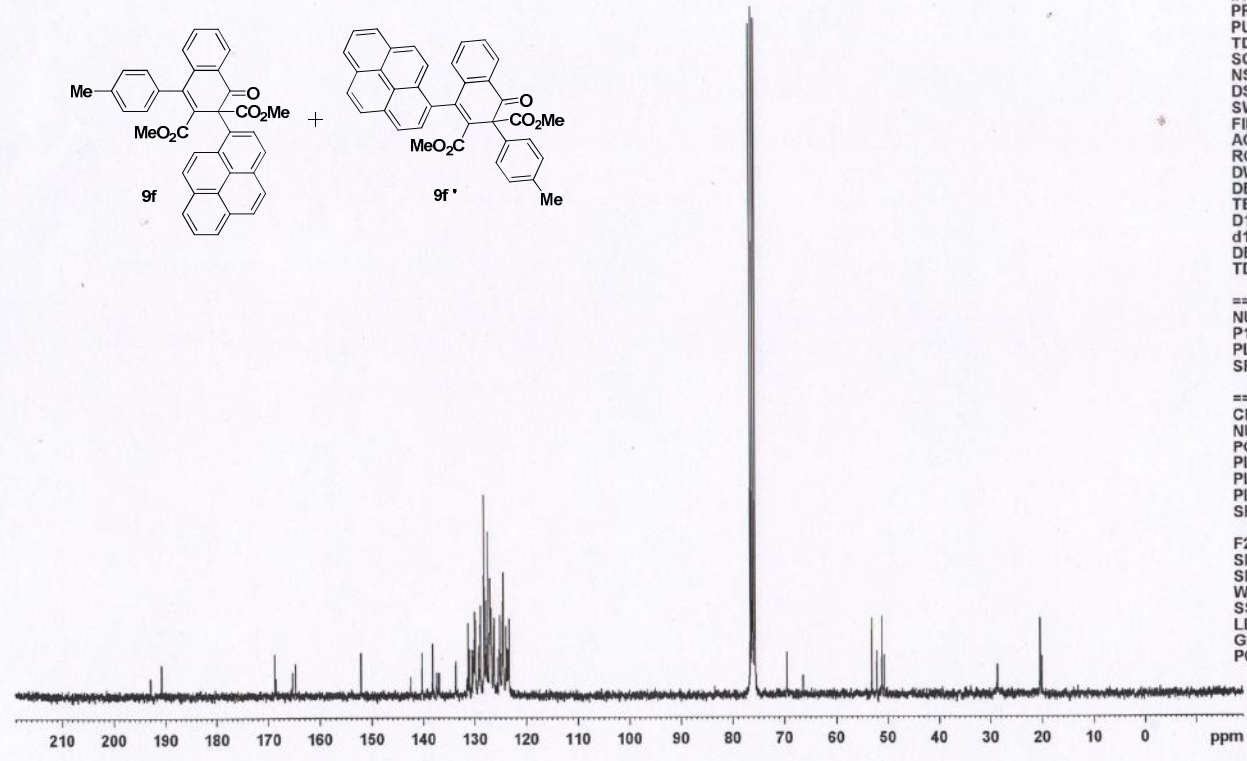

<sup>13</sup>C-NMR Spectra of Compound 9f & 9f'



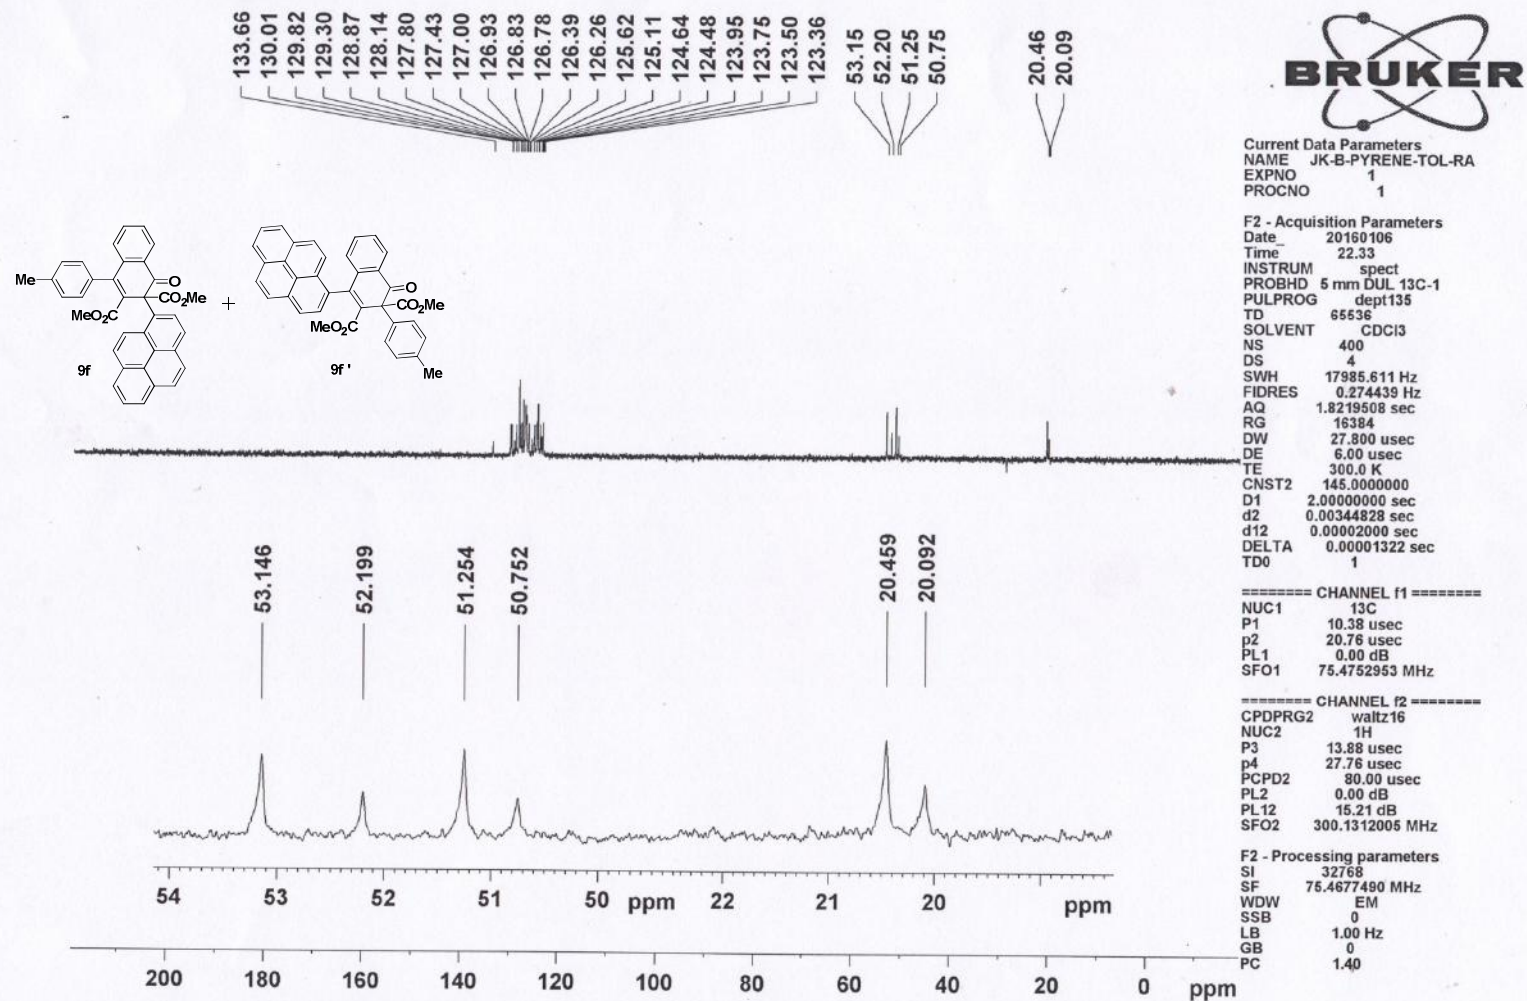

DEPT-135 NMR Spectra of Compound **9f** & **9f'**



8.211  
8.180  
8.159  
8.134  
8.114  
8.076  
8.017  
8.009  
7.993  
7.977  
7.784  
7.752  
7.707  
7.682  
7.656  
7.556  
7.531  
7.506  
7.489  
7.453  
7.427  
7.233  
7.158  
7.145  
7.131  
3.945  
2.948

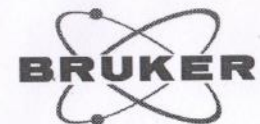

Current Data Parameters  
NAME JK-B-44A  
EXPNO 1  
PROCNO 1

F2 - Acquisition Parameters  
Date\_ 20150325  
Time 23.46  
INSTRUM spect  
PROBHD 5 mm DUL 13C-1  
PULPROG zg30  
TD 65536  
SOLVENT CDCl3  
NS 16  
DS 2  
SWH 6172.839 Hz  
FIDRES 0.094190 Hz  
AQ 5.3084660 sec  
RG 287.4  
DW 81.000 usec  
DE 6.00 usec  
TE 300.0 K  
D1 1.00000000 sec  
TD0 1

===== CHANNEL f1 =====  
NUC1 1H  
P1 13.15 usec  
PL1 0.00 dB  
SFO1 300.1318534 MHz

F2 - Processing parameters  
SI 32768  
SF 300.1300000 MHz  
WDW EM  
SSB 0  
LB 0.30 Hz  
GB 0  
PC 1.00

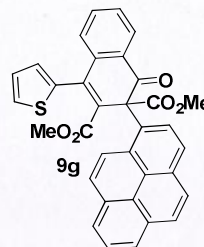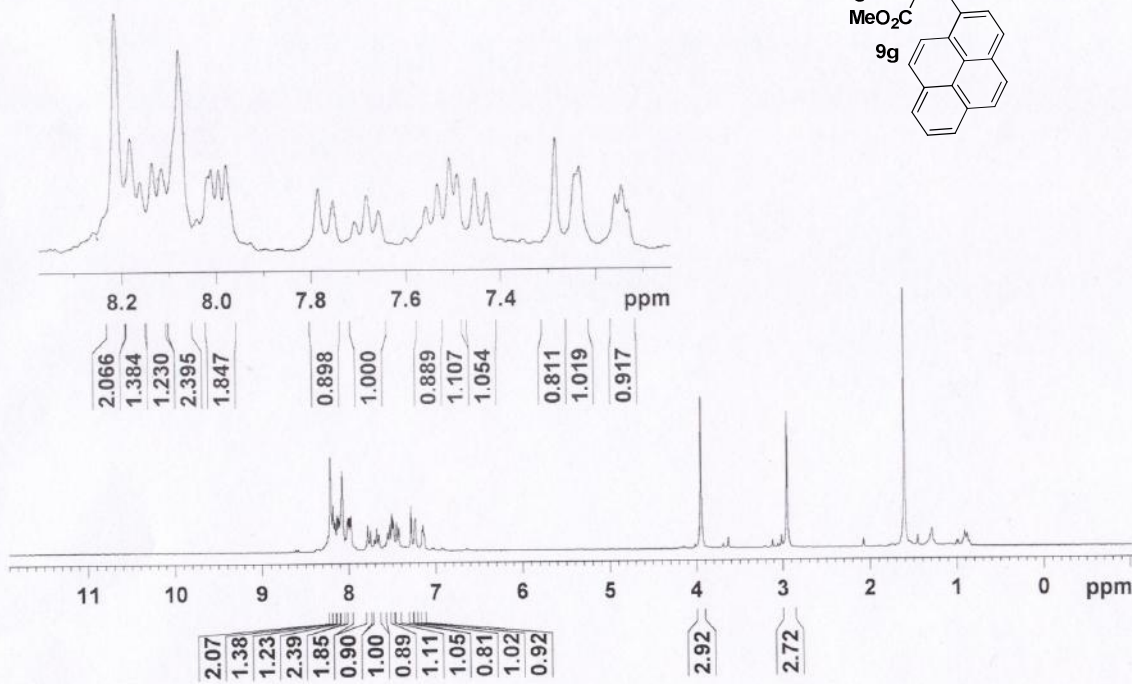

<sup>1</sup>H-NMR Spectra of Compound 9g

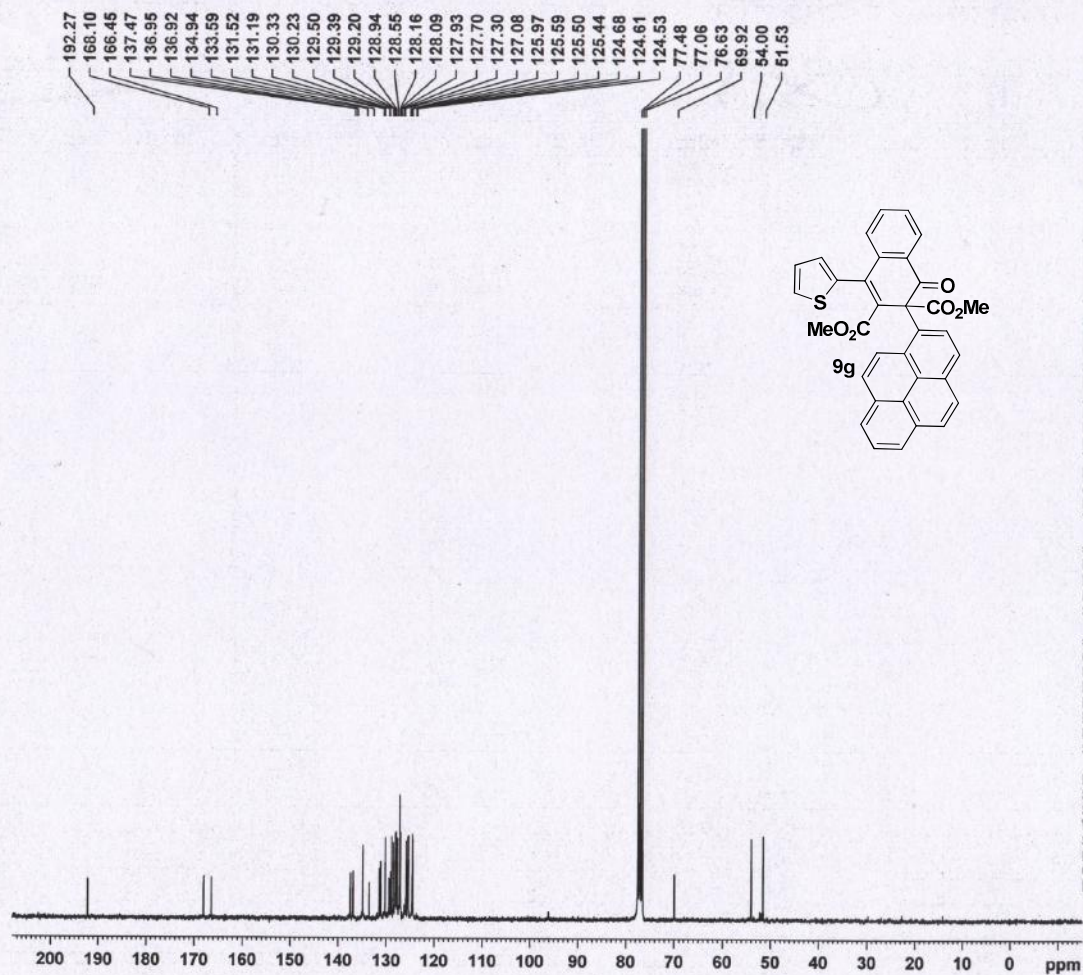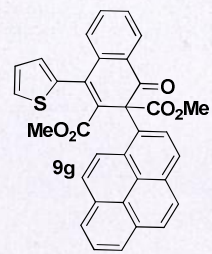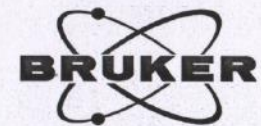

Current Data Parameters  
NAME JK-B-44A  
EXPNO 2  
PROCNO 1

F2 - Acquisition Parameters  
Date\_ 20150405  
Time 7.08  
INSTRUM spect  
PROBHD 5 mm DUL 13C-1  
PULPROG zgpg30  
TD 65536  
SOLVENT CDCl3  
NS 4428  
DS 4  
SWH 17986.611 Hz  
FIDRES 0.274439 Hz  
AQ 1.8219508 sec  
RG 5792.6  
DW 27.800 usec  
DE 6.00 usec  
TE 300.0 K  
D1 2.00000000 sec  
d11 0.03000000 sec  
DELTA 1.89999998 sec  
TD0 1

===== CHANNEL f1 =====  
NUC1 13C  
P1 9.30 usec  
PL1 0.00 dB  
SFO1 75.4752953 MHz

===== CHANNEL f2 =====  
CPDPRG2 waltz16  
NUC2 1H  
PCPD2 80.00 usec  
PL2 0.00 dB  
PL12 15.68 dB  
PL13 16.00 dB  
SFO2 300.1312005 MHz

F2 - Processing parameters  
SI 32768  
SF 75.4677490 MHz  
WDW EM  
SSB 0  
LB 1.00 Hz  
GB 0  
PC 1.40

<sup>13</sup>C-NMR Spectra of Compound 9g

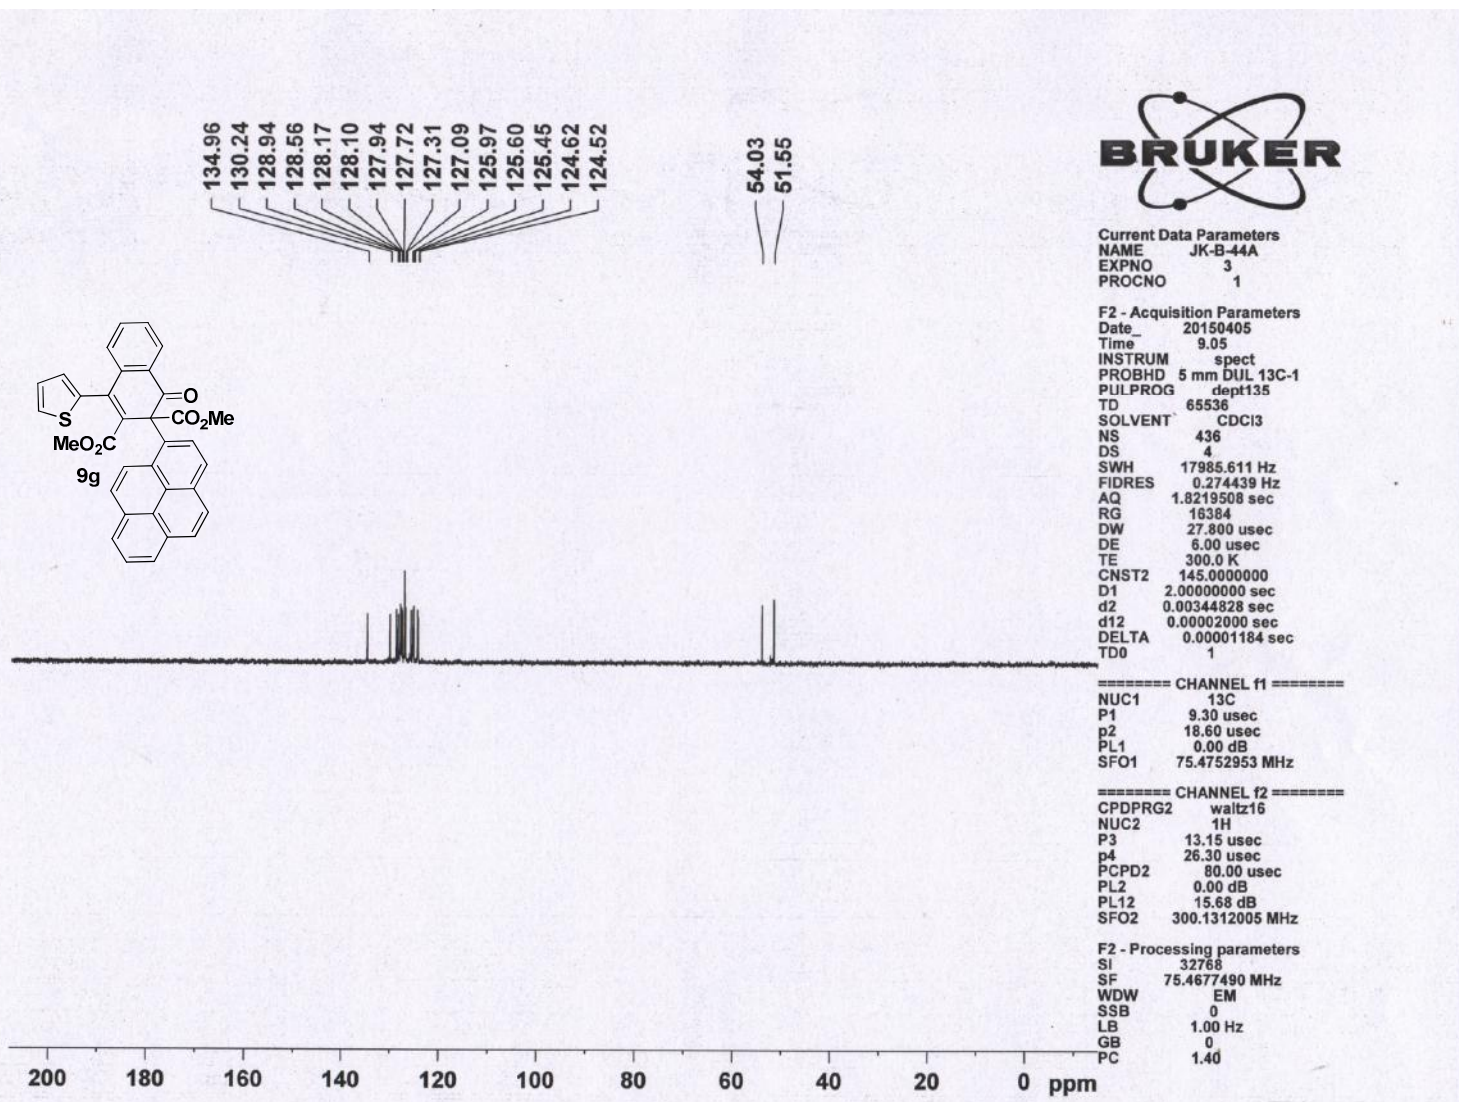

DEPT-135 NMR Spectra of Compound **9g**



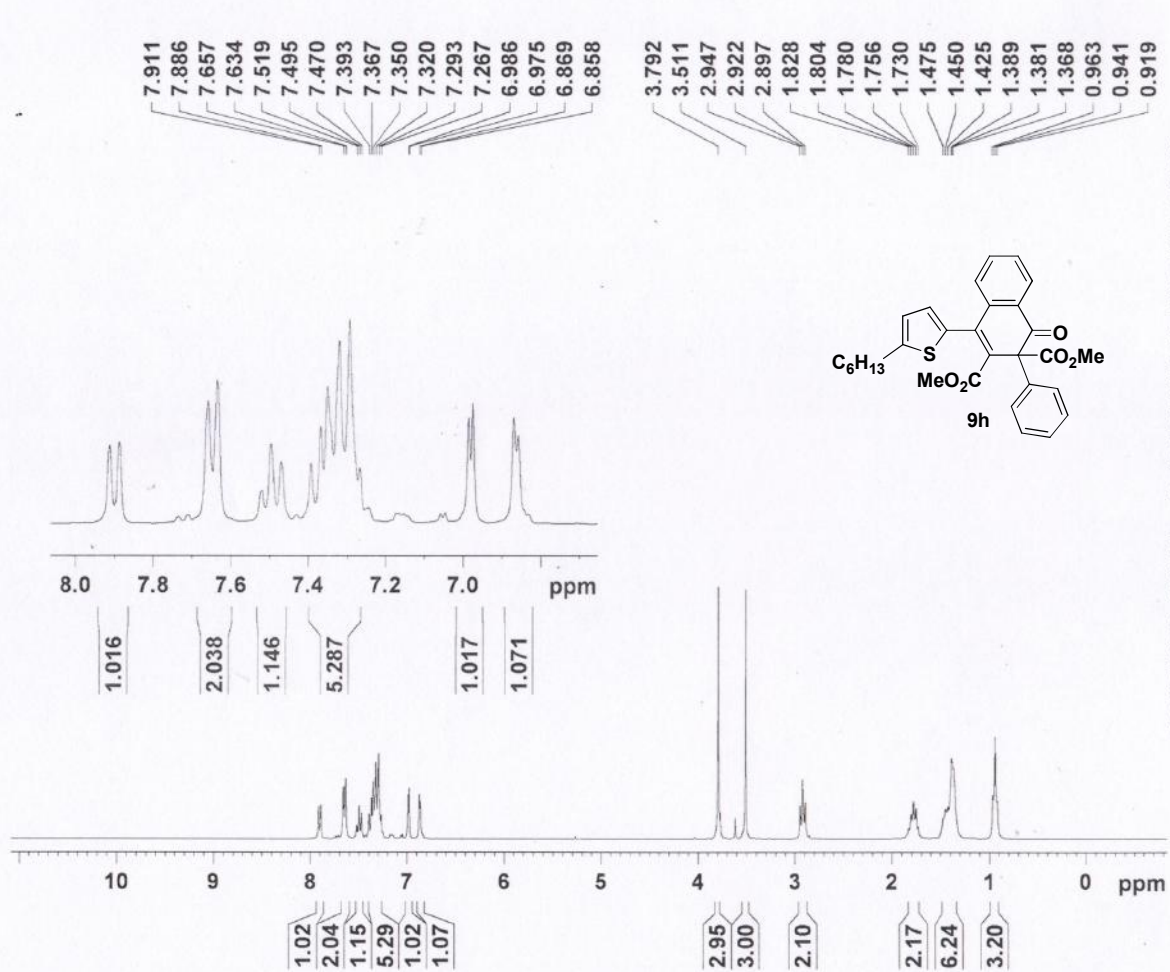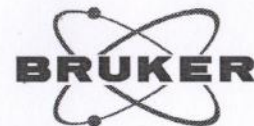

Current Data Parameters  
 NAME JK-B-PHE-2-HEX-THI-RA  
 EXPNO 1  
 PROCNO 1

F2 - Acquisition Parameters  
 Date\_ 20151114  
 Time 14.16  
 INSTRUM spect  
 PROBHD 5 mm DUL 13C-1  
 PULPROG zg30  
 TD 65536  
 SOLVENT CDCl3  
 NS 16  
 DS 2  
 SWH 6172.839 Hz  
 FIDRES 0.094190 Hz  
 AQ 5.3084660 sec  
 RG 25.4  
 DW 81.000 usec  
 DE 6.00 usec  
 TE 300.0 K  
 D1 1.00000000 sec  
 TD0 1

===== CHANNEL f1 =====  
 NUC1 1H  
 P1 13.88 usec  
 PL1 0.00 dB  
 SFO1 300.1318534 MHz

F2 - Processing parameters  
 SI 32768  
 SF 300.1300000 MHz  
 WDW EM  
 SSB 0  
 LB 0.30 Hz  
 GB 0  
 PC 1.00

<sup>1</sup>H-NMR Spectra of Compound 9h



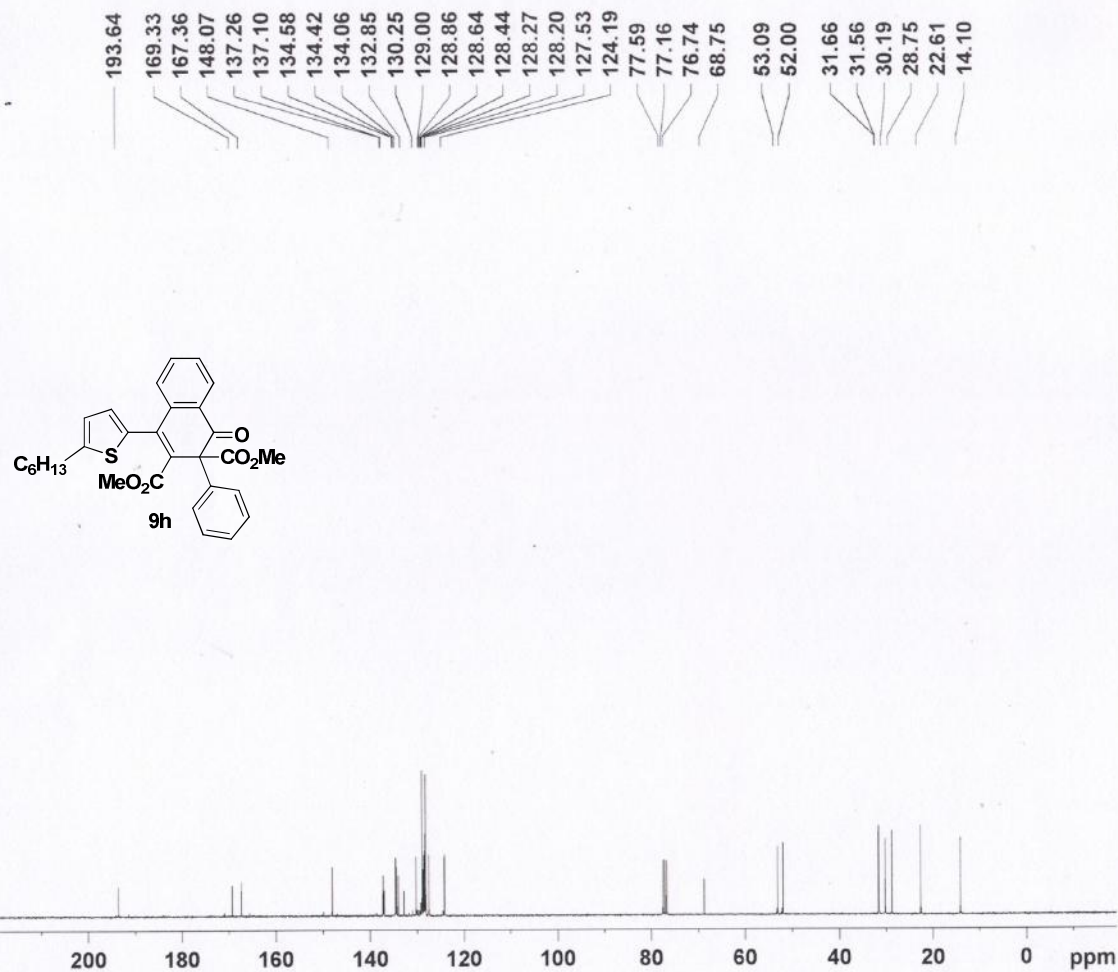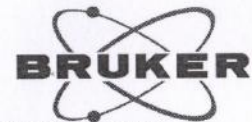

Current Data Parameters  
 NAME JK-B-PHE-2-HEX-THI-RA  
 EXPNO 3  
 PROCNO 1

F2 - Acquisition Parameters  
 Date 20161114  
 Time 14.58  
 INSTRUM spect  
 PROBHD 5 mm DUL 13C-1  
 PULPROG zgpg30  
 TD 65536  
 SOLVENT CDCI3  
 NS 423  
 DS 4  
 SWH 17985.611 Hz  
 FIDRES 0.274439 Hz  
 AQ 1.8219508 sec  
 RG 812.7  
 DW 27.800 usec  
 DE 5.00 usec  
 TE 300.0 K  
 D1 2.00000000 sec  
 d11 0.03000000 sec  
 DELTA 1.89999998 sec  
 TD0 1

===== CHANNEL f1 =====  
 NUC1 13C  
 P1 10.38 usec  
 PL1 0.00 dB  
 SFO1 75.4752953 MHz

===== CHANNEL f2 =====  
 CPDPRG2 waltz16  
 NUC2 1H  
 PCPD2 80.00 usec  
 PL2 0.00 dB  
 PL12 15.21 dB  
 PL13 16.00 dB  
 SFO2 300.1312005 MHz

F2 - Processing parameters  
 SI 32768  
 SF 75.4677490 MHz  
 WDW EM  
 SSB 0  
 LB 1.00 Hz  
 GB 0  
 PC 1.40

<sup>13</sup>C-NMR Spectra of Compound **9h**

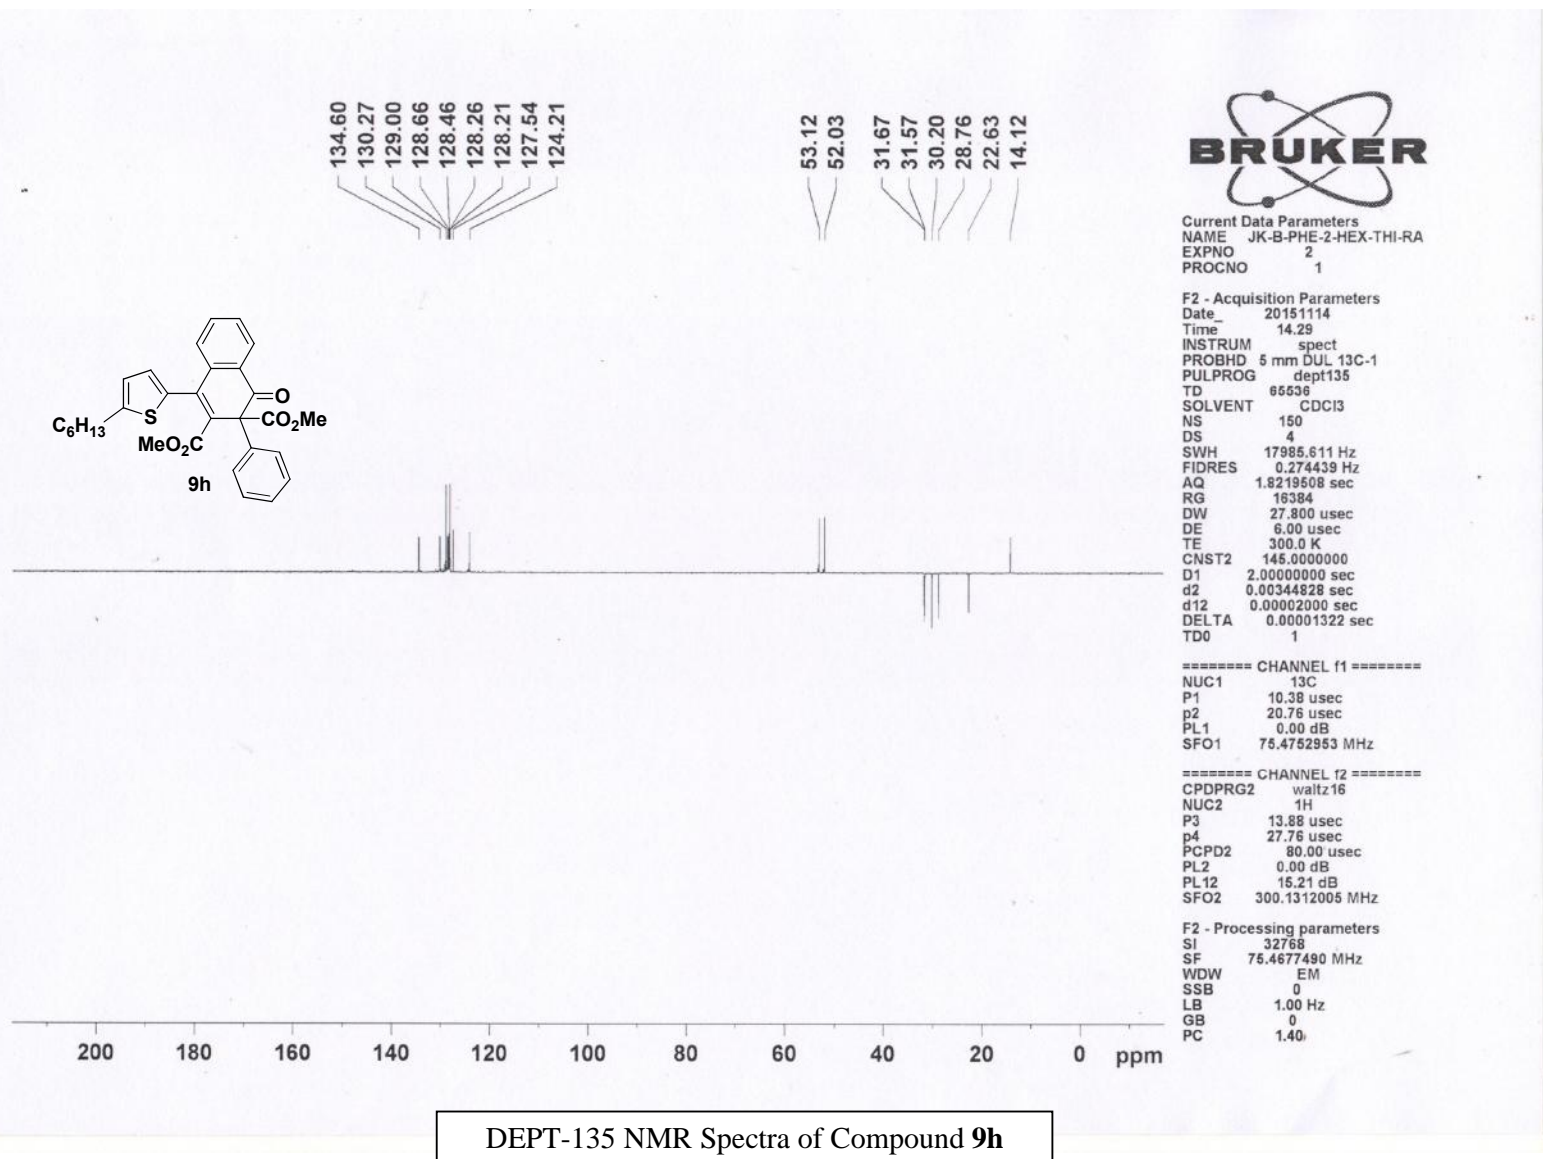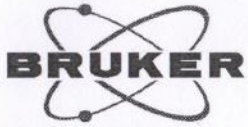

Current Data Parameters  
 NAME JK-B-PHE-2-HEX-THI-RA  
 EXPNO 2  
 PROCNO 1

F2 - Acquisition Parameters  
 Date\_ 20151114  
 Time 14.29  
 INSTRUM spect  
 PROBHD 5 mm DUL 13C-1  
 PULPROG dept135  
 TD 66536  
 SOLVENT CDCl3  
 NS 150  
 DS 4  
 SWH 17985.611 Hz  
 FIDRES 0.274439 Hz  
 AQ 1.8219508 sec  
 RG 16384  
 DW 27.800 usec  
 DE 6.00 usec  
 TE 300.0 K  
 CNST2 145.000000  
 D1 2.00000000 sec  
 d2 0.00344828 sec  
 d12 0.00002000 sec  
 DELTA 0.00001322 sec  
 TDO 1

===== CHANNEL f1 =====  
 NUC1 13C  
 P1 10.38 usec  
 p2 20.76 usec  
 PL1 0.00 dB  
 SFO1 75.4752953 MHz

===== CHANNEL f2 =====  
 CPDPRG2 waltz16  
 NUC2 1H  
 P3 13.88 usec  
 p4 27.76 usec  
 PCPD2 80.00 usec  
 PL2 0.00 dB  
 PL12 15.24 dB  
 SFO2 300.1312005 MHz

F2 - Processing parameters  
 SI 32768  
 SF 75.4677490 MHz  
 WDW EM  
 SSB 0  
 LB 1.00 Hz  
 GB 0  
 PC 1.40

DEPT-135 NMR Spectra of Compound **9h**

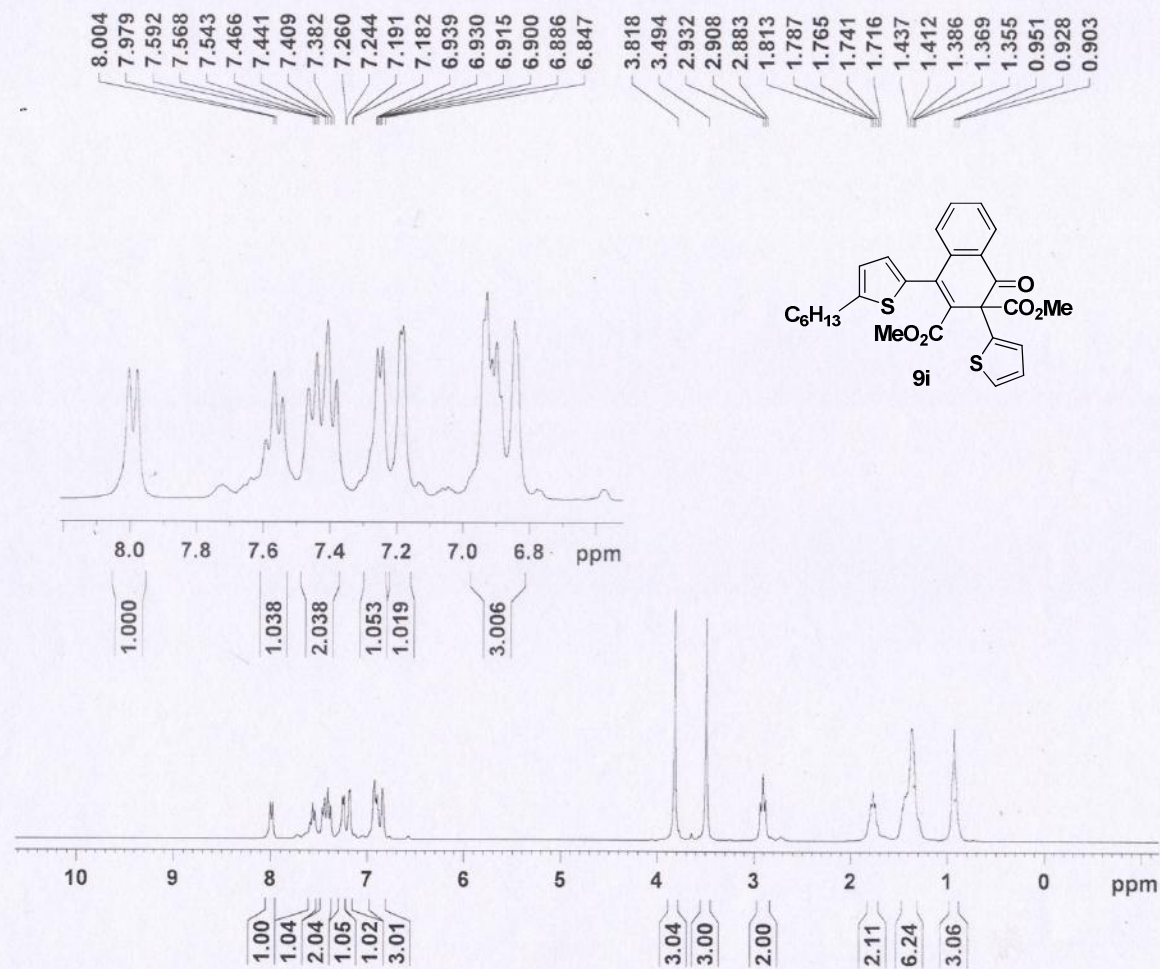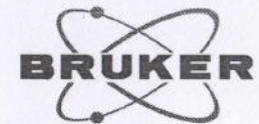

Current Data Parameters  
 NAME JK-B-THI-2-HEX-THI-RA  
 EXPNO 4  
 PROCNO 1

F2 - Acquisition Parameters  
 Date\_ 20151114  
 Time 16.38  
 INSTRUM spect  
 PROBHD 5 mm DUL 13C-1  
 PULPROG zg30  
 TD 65536  
 SOLVENT CDCl3  
 NS 16  
 DS 2  
 SWH 6172.839 Hz  
 FIDRES 0.094190 Hz  
 AQ 5.3084660 sec  
 RG 35.9  
 DW 81.000 usec  
 DE 6.00 usec  
 TE 300.0 K  
 D1 1.0000000 sec  
 TD0 1

===== CHANNEL f1 =====  
 NUC1 1H  
 P1 13.88 usec  
 PL1 0.00 dB  
 SFO1 300.1318534 MHz

F2 - Processing parameters  
 SI 32768  
 SF 300.1300000 MHz  
 WDW EM  
 SSB 0  
 LB 0.30 Hz  
 GB 0  
 PC 1.00

<sup>1</sup>H-NMR Spectra of Compound **9i**

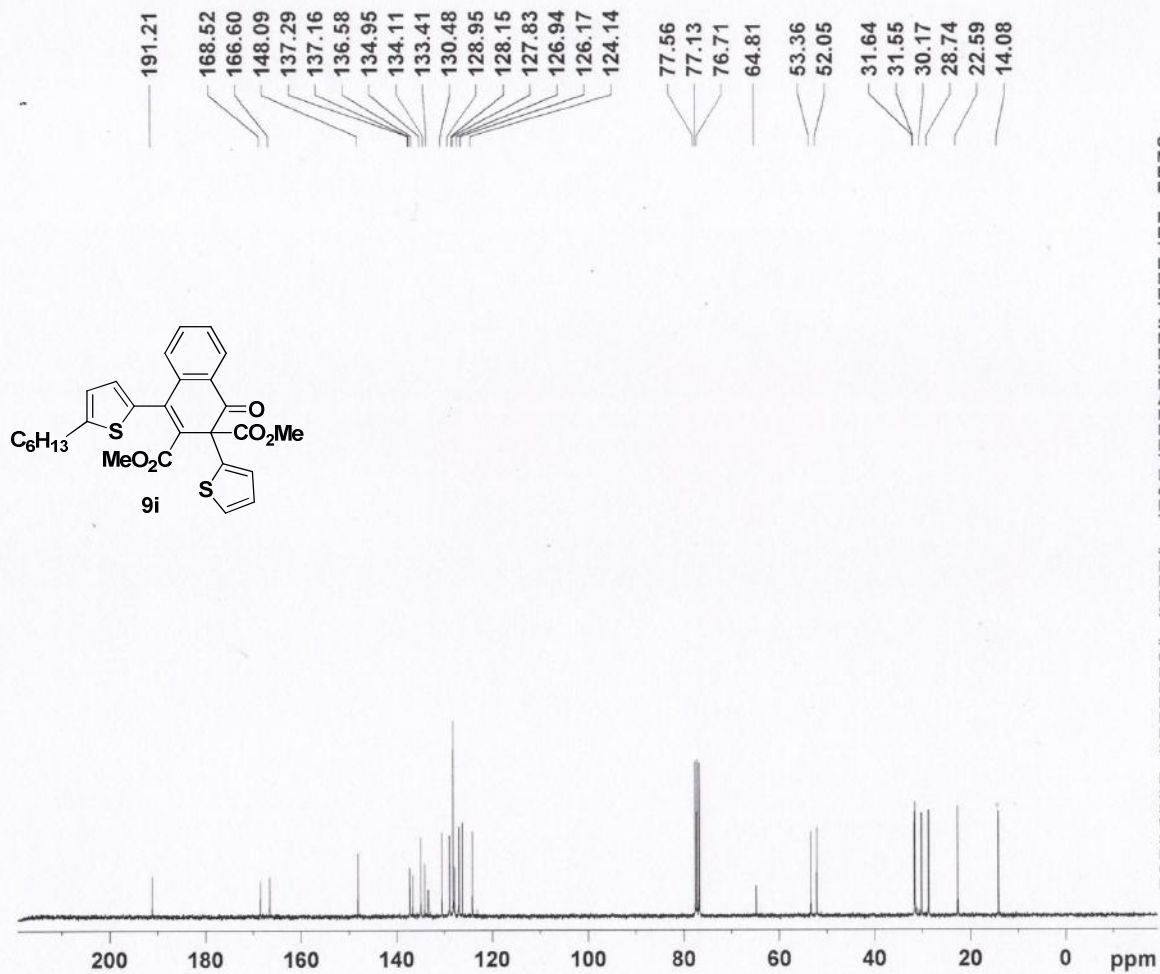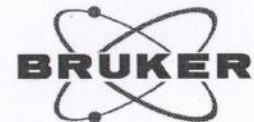

Current Data Parameters  
 NAME JK-B-THI-2-HEX-THI-RA  
 EXPNO 3  
 PROCNO 1

F2 - Acquisition Parameters  
 Date 20151114  
 Time 16.35  
 INSTRUM spect  
 PROBHD 5 mm DUL 13C-1  
 PULPROG zgpg30  
 TD 65536  
 SOLVENT CDCl3  
 NS 250  
 DS 4  
 SWH 17985.611 Hz  
 FIDRES 0.274439 Hz  
 AQ 1.8219508 sec  
 RG 724.1  
 DW 27.800 usec  
 DE 6.00 usec  
 TE 300.0 K  
 D1 2.00000000 sec  
 d11 0.03000000 sec  
 DELTA 1.89999998 sec  
 TD0 1

===== CHANNEL f1 =====  
 NUC1 13C  
 P1 10.38 usec  
 PL1 0.00 dB  
 SFO1 75.4752953 MHz

===== CHANNEL f2 =====  
 CPDPRG2 waltz16  
 NUC2 1H  
 PCPD2 80.00 usec  
 PL2 0.00 dB  
 PL12 15.21 dB  
 PL13 16.00 dB  
 SFO2 300.1312005 MHz

F2 - Processing parameters  
 SI 32768  
 SF 75.4677490 MHz  
 WDW EM  
 SSB 0  
 LB 1.00 Hz  
 GB 0  
 PC 1.40

<sup>13</sup>C-NMR Spectra of Compound **9i**



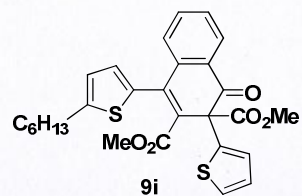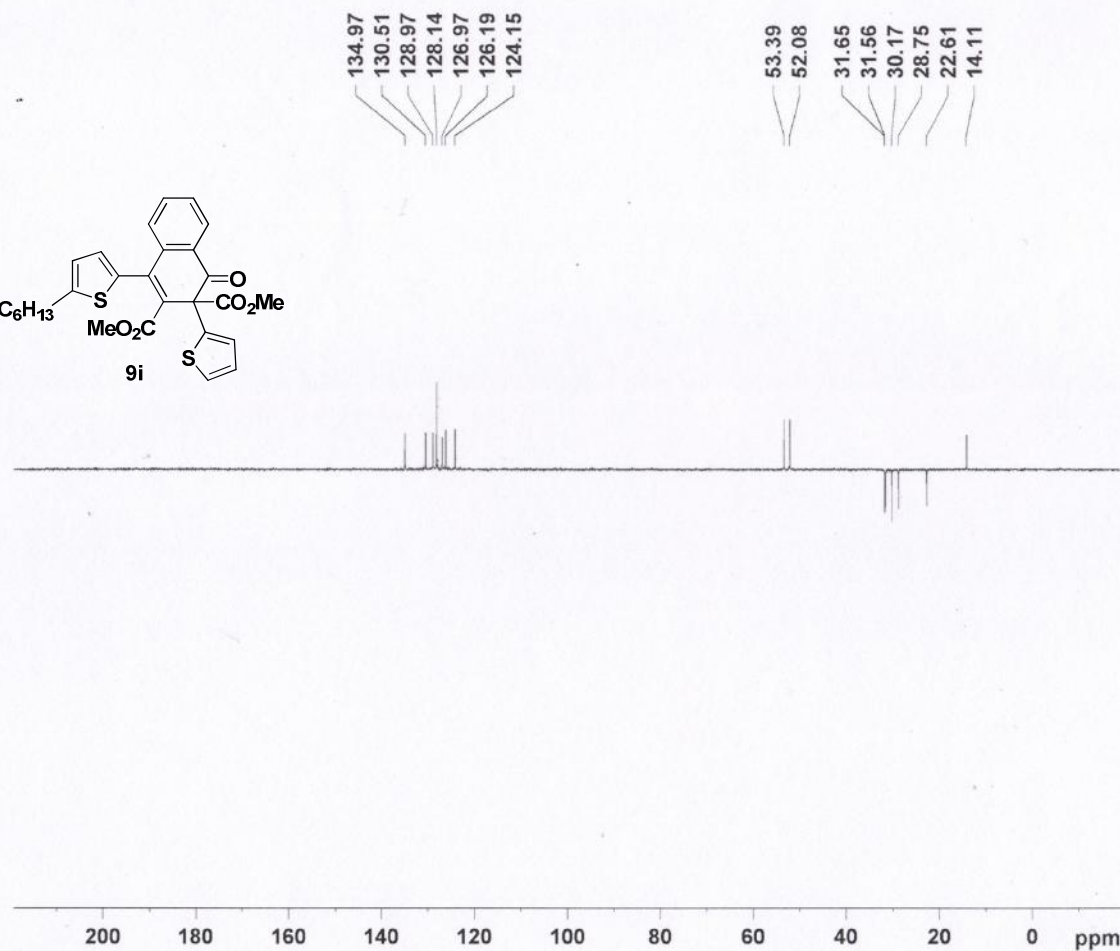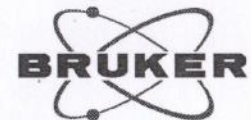

Current Data Parameters  
NAME JK-B-THI-2-HEX-THI-RA  
EXPNO 2  
PROCNO 1

F2 - Acquisition Parameters  
Date\_ 20161114  
Time 16.18  
INSTRUM spect  
PROBHD 5 mm DUL 13C-1  
PULPROG dept135  
TD 66636  
SOLVENT GDCI3  
NS 75  
DS 4  
SWH 17985.611 Hz  
FIDRES 0.274439 Hz  
AQ 1.8219508 sec  
RG 16384  
DW 27.800 usec  
DE 6.00 usec  
TE 300.0 K  
CNST2 145.0000000  
D1 2.00000000 sec  
d2 0.00344828 sec  
d12 0.00002000 sec  
DELTA 0.00001322 sec  
TDO 1

===== CHANNEL f1 =====  
NUC1 13C  
P1 10.38 usec  
p2 20.76 usec  
PL1 0.00 dB  
SFO1 75.4752953 MHz

===== CHANNEL f2 =====  
CPDPRG2 waltz16  
NUC2 1H  
P3 13.88 usec  
p4 27.76 usec  
PCPD2 80.00 usec  
PL2 0.00 dB  
PL12 15.21 dB  
SFO2 300.1312005 MHz

F2 - Processing parameters  
SI 32768  
SF 75.4677490 MHz  
WDW EM  
SSB 0  
LB 1.00 Hz  
GB 0  
PC 1.40

DEPT-135 NMR Spectra of Compound 9i

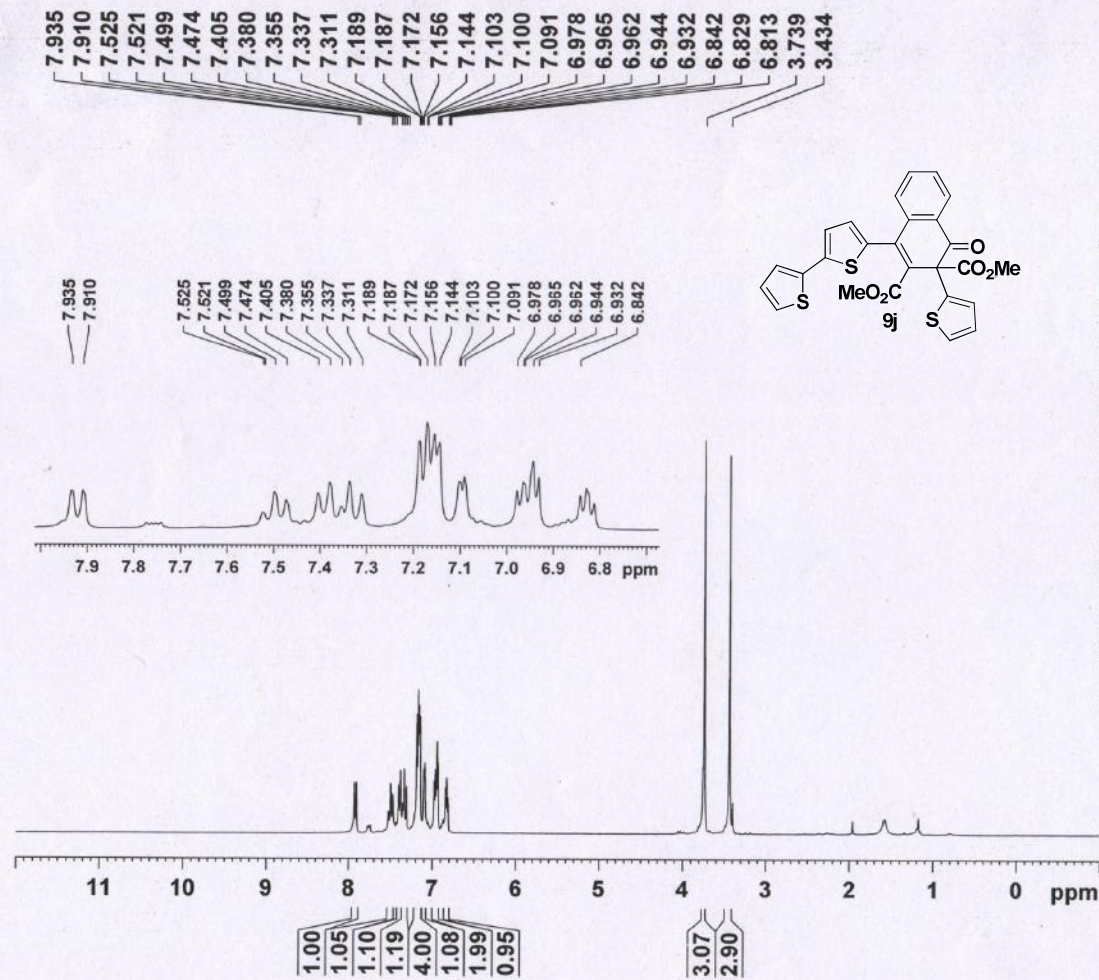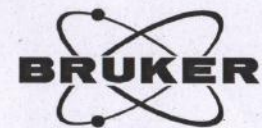

Current Data Parameters  
 NAME JK-B-41A  
 EXPNO 1  
 PROCNO 1

F2 - Acquisition Parameters  
 Date\_ 20150324  
 Time 23.30  
 INSTRUM spect  
 PROBHD 5 mm DUL 13C-1  
 PULPROG zg30  
 TD 65536  
 SOLVENT CDCl3  
 NS 16  
 DS 2  
 SWH 6172.839 Hz  
 FIDRES 0.094190 Hz  
 AQ 5.3084660 sec  
 RG 90.5  
 DW 81.000 usec  
 DE 6.00 usec  
 TE 300.0 K  
 D1 1.0000000 sec  
 TD0 1

==== CHANNEL f1 =====  
 NUC1 1H  
 P1 13.15 usec  
 PL1 0.00 dB  
 SFO1 300.1318534 MHz

F2 - Processing parameters  
 SI 32768  
 SF 300.1300327 MHz  
 WDW EM  
 SSB 0  
 LB 0.30 Hz  
 GB 0  
 PC 1.00

<sup>1</sup>H-NMR Spectra of Compound **9j**

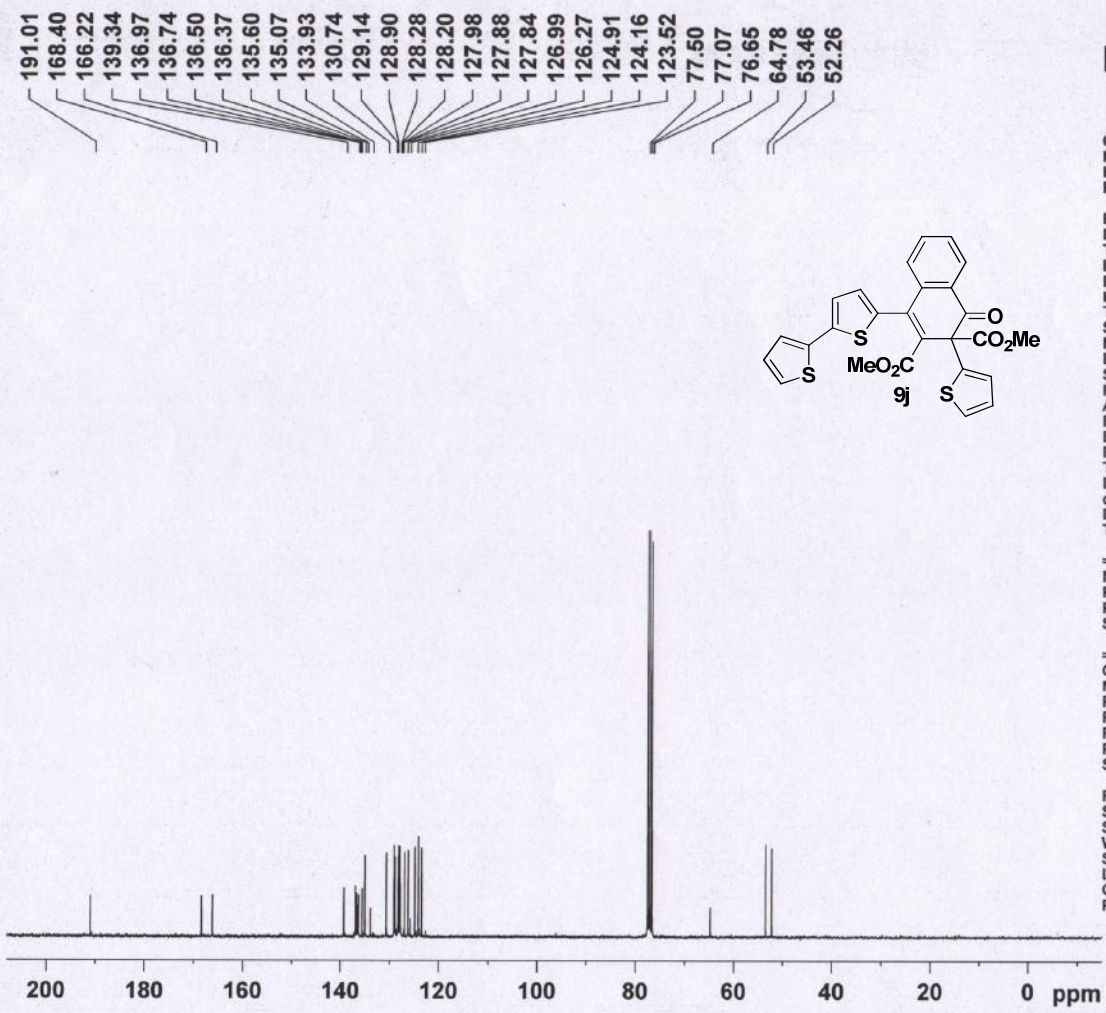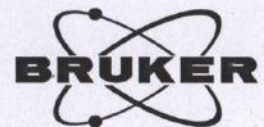

Current Data Parameters  
 NAME JK-B-41A  
 EXPNO 3  
 PROCNO 1

F2 - Acquisition Parameters  
 Date\_ 20150325  
 Time 1.35  
 INSTRUM spect  
 PROBHD 5 mm DUL 13C-1  
 PULPROG zgpg30  
 TD 65536  
 SOLVENT CDCl3  
 NS 1808  
 DS 4  
 SWH 17985.611 Hz  
 FIDRES 0.274439 Hz  
 AQ 1.8219508 sec  
 RG 3251  
 DW 27.800 usec  
 DE 6.00 usec  
 TE 300.0 K  
 D1 2.0000000 sec  
 d11 0.0300000 sec  
 DELTA 1.89999998 sec  
 TD0 1

===== CHANNEL f1 =====  
 NUC1 13C  
 P1 9.30 usec  
 PL1 0.00 dB  
 SFO1 75.4752953 MHz

===== CHANNEL f2 =====  
 CPDPRG2 waltz16  
 NUC2 1H  
 PCPD2 80.00 usec  
 PL2 0.00 dB  
 PL12 15.68 dB  
 PL13 16.00 dB  
 SFO2 300.1312005 MHz

F2 - Processing parameters  
 SI 32768  
 SF 75.4677490 MHz  
 WDW EM  
 SSB 0  
 LB 1.00 Hz  
 GB 0  
 PC 1.40

<sup>13</sup>C-NMR Spectra of Compound 9j



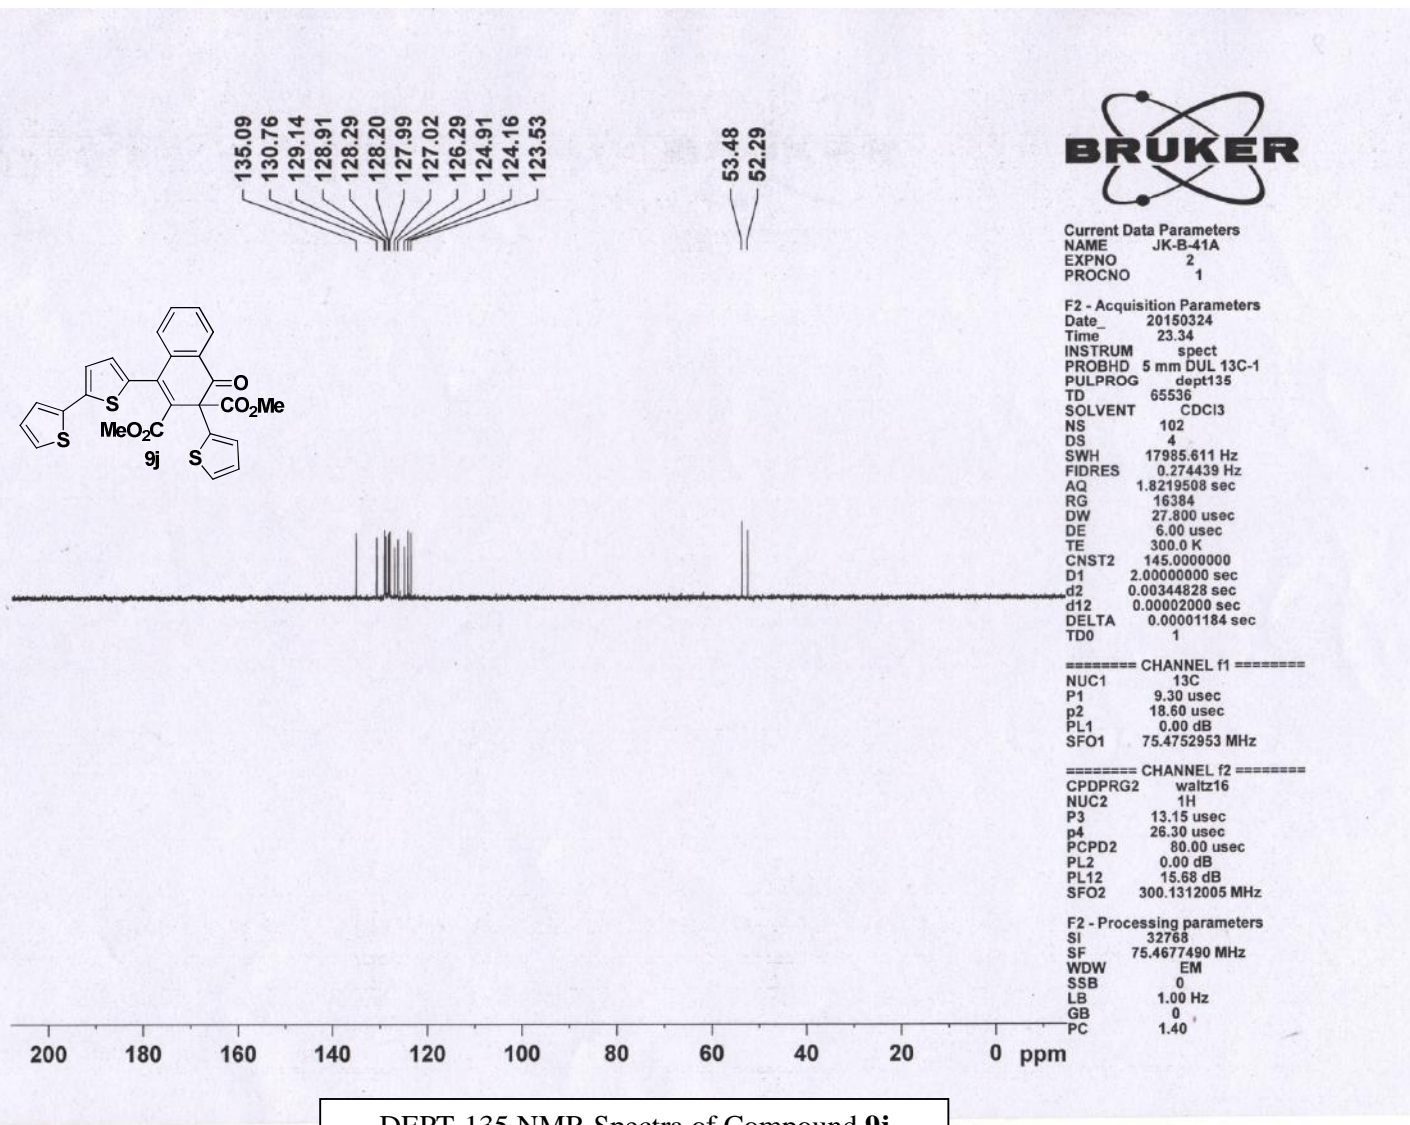

DEPT-135 NMR Spectra of Compound 9j



UNIV. OF MADRAS

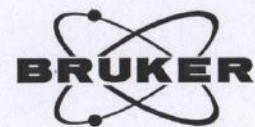

Current Data Parameters  
NAME JK-B-43B  
EXPNO 1  
PROCNO 1

F2 - Acquisition Parameters  
Date\_ 20150325  
Time\_ 13.12  
INSTRUM spect  
PROBHD 5 mm DUL 13C-1  
PULPROG zg30  
TD 65536  
SOLVENT CDC13  
NS 16  
DS 2  
SWH 6172.839 Hz  
FIDRES 0.094190 Hz  
AQ 5.3084660 sec  
RG 80.6  
DW 81.000 usec  
DE 6.00 usec  
TE 300.0 K  
D1 1.00000000 sec  
TDO 1

==== CHANNEL f1 =====  
NUC1 1H  
P1 13.15 usec  
PL1 0.00 dB  
SFO1 300.1318534 MHz

F2 - Processing parameters  
SI 32768  
SF 300.1300000 MHz  
WDW EM  
SSB 0  
LB 0.30 Hz  
GB 0  
PC 1.00

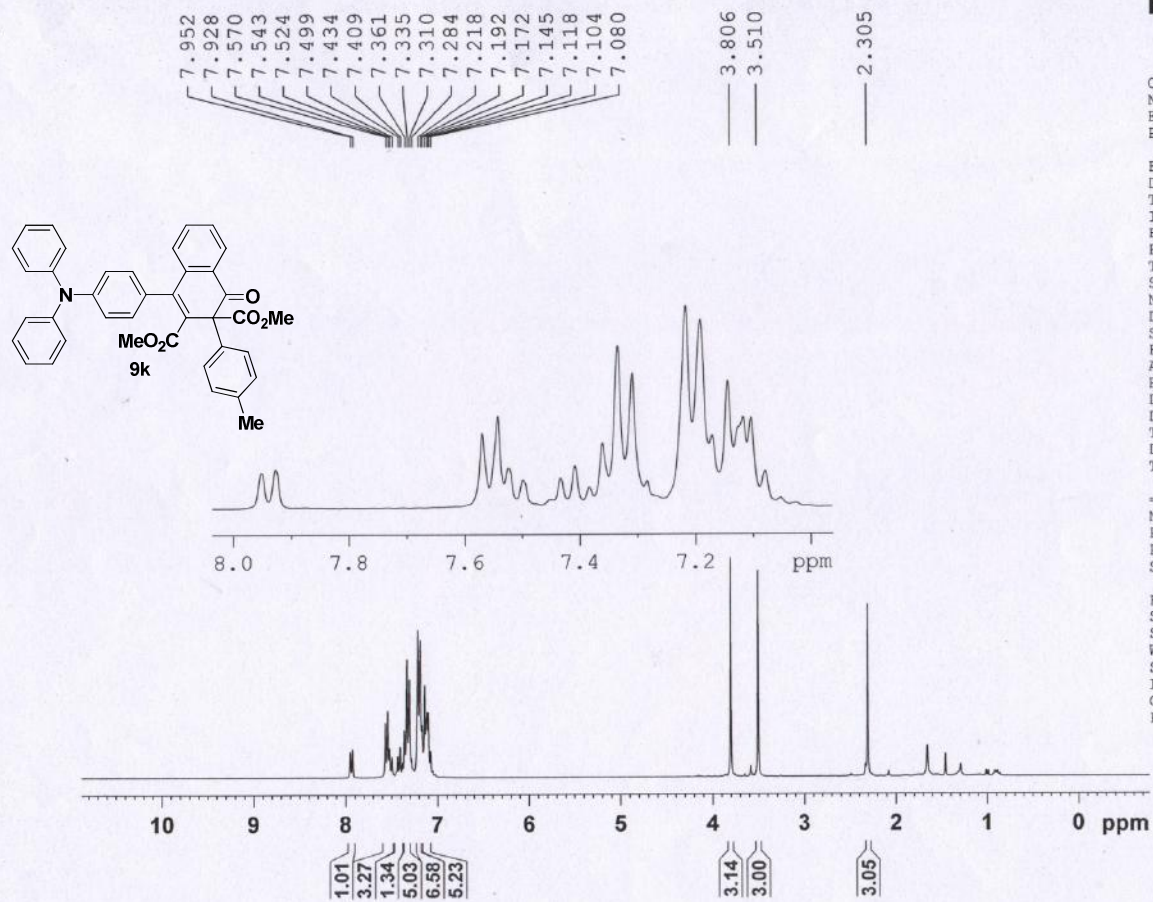

<sup>1</sup>H-NMR Spectra of Compound 9k

UNIV. OF MADRAS

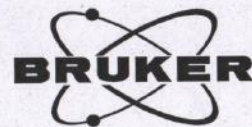

194.18  
169.77  
167.57  
147.98  
147.51  
143.75  
138.26  
137.49  
134.40  
131.15  
130.99  
130.67  
130.13  
129.88  
129.46  
129.24  
129.00  
128.87  
127.68  
125.15  
124.74  
123.42  
122.84  
77.55  
77.13  
76.70  
68.10  
53.07  
51.79

21.07

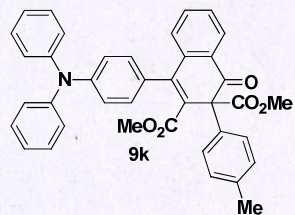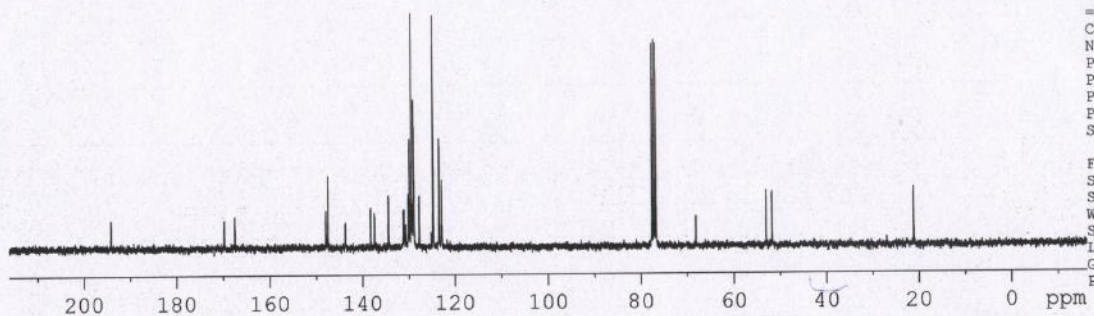

Current Data Parameters  
NAME JK-B-43B  
EXPNO 3  
PROCNO 1

F2 - Acquisition Parameters  
Date 20150325  
Time 15.53  
INSTRUM spect  
PROBHD 5 mm DUL 13C-1  
PULPROG zgpg30  
TD 65536  
SOLVENT CDC13  
NS 236  
DS 4  
SWH 17985.611 Hz  
FIDRES 0.274439 Hz  
AQ 1.8219508 sec  
RG 2048  
DW 27.800 usec  
DE 6.00 usec  
TE 300.0 K  
D1 2.0000000 sec  
d11 0.0300000 sec  
DELTA 1.89999998 sec  
TD0 1

===== CHANNEL f1 =====  
NUC1 13C  
P1 9.30 usec  
PL1 0.00 dB  
SFO1 75.4752953 MHz

===== CHANNEL f2 =====  
CPDPRG2 waltz16  
NUC2 1H  
PCPD2 80.00 usec  
PL2 0.00 dB  
PL12 15.68 dB  
PL13 16.00 dB  
SFO2 300.1312005 MHz

F2 - Processing parameters  
SI 32768  
SF 75.4677490 MHz  
WDW EM  
SSB 0  
LB 1.00 Hz  
GB 0  
PC 1.40

<sup>13</sup>C-NMR Spectra of Compound 9k

UNIV. OF MADRAS

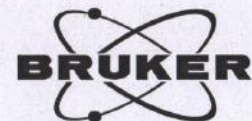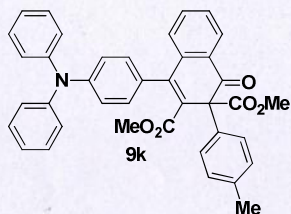

134.41  
130.15  
129.88  
129.46  
129.00  
128.87  
127.69  
125.15  
124.74  
123.42  
122.84

53.09  
51.82

21.09

Current Data Parameters  
NAME JK-B-43B  
EXPNO 2  
PROCNO 1

F2 - Acquisition Parameters  
Date 20150325  
Time 15.39  
INSTRUM spect  
PROBHD 5 mm DUL 13C-1  
PULPROG dept135  
TD 65536  
SOLVENT CDCl3  
NS 256  
DS 4  
SWH 17985.611 Hz  
FIDRES 0.274439 Hz  
AQ 1.8219508 sec  
RG 16384  
DW 27.800 usec  
DE 6.00 usec  
TE 300.0 K  
CNST2 145.0000000  
D1 2.00000000 sec  
d2 0.00344828 sec  
d12 0.00002000 sec  
DELTA 0.00001184 sec  
TD0 1

==== CHANNEL f1 =====  
NUC1 13C  
P1 9.30 usec  
p2 18.60 usec  
PL1 0.00 dB  
SFO1 75.4752953 MHz

==== CHANNEL f2 =====  
CFDPRG2 waltz16  
NUC2 1H  
P3 13.15 usec  
p4 26.30 usec  
PCPD2 80.00 usec  
PL2 0.00 dB  
PL12 15.68 dB  
SFO2 300.1312005 MHz

F2 - Processing parameters  
SI 32768  
SF 75.4677490 MHz  
WDW EM  
SSB 0  
LB 1.00 Hz  
GB 0  
PC 1.40

200 180 160 140 120 100 80 60 40 20 0 ppm

DEPT-135 NMR Spectra of Compound 9k



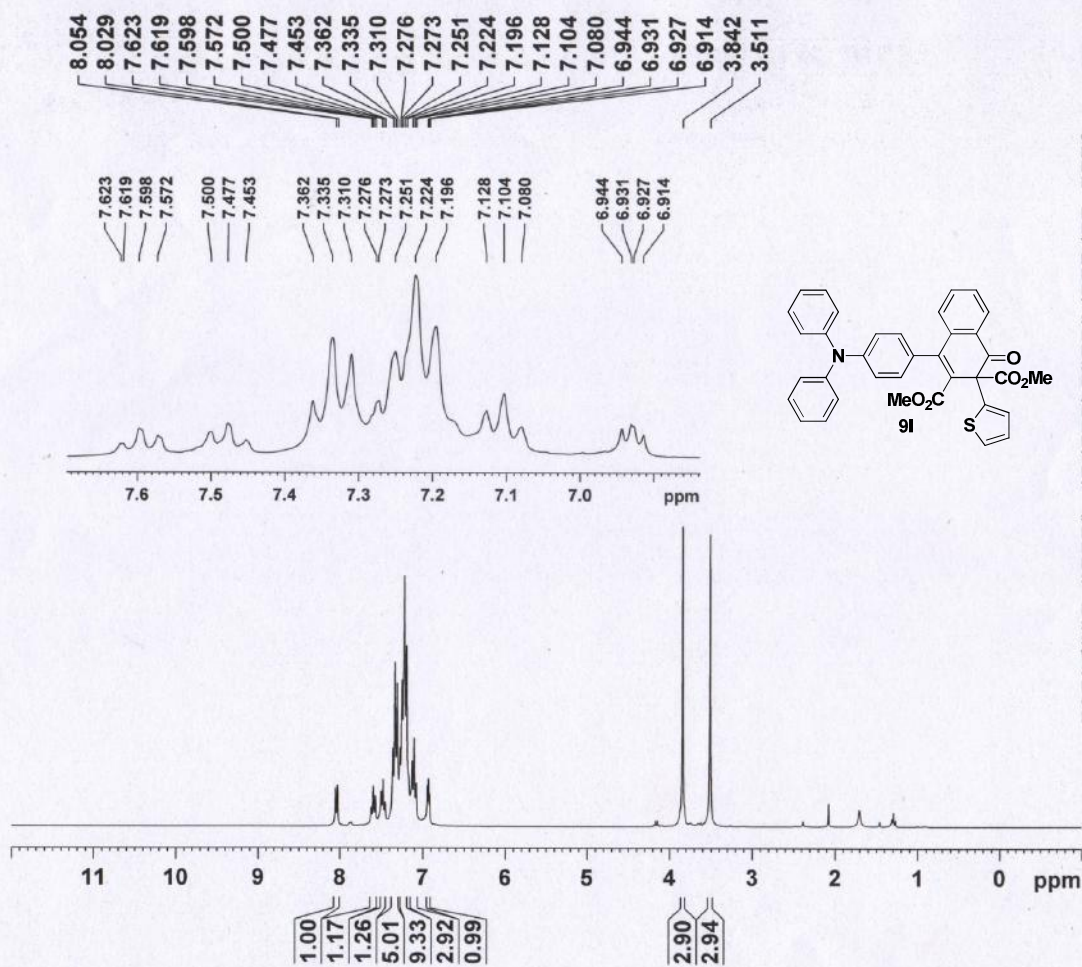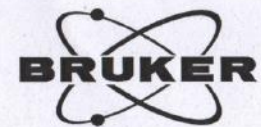

Current Data Parameters  
 NAME JK-B-37B  
 EXPNO 1  
 PROCNO 1

F2 - Acquisition Parameters  
 Date\_ 20150324  
 Time 19.42  
 INSTRUM spect  
 PROBHD 5 mm DUL 13C-1  
 PULPROG zg30  
 TD 65536  
 SOLVENT CDCl3  
 NS 16  
 DS 2  
 SWH 6172.839 Hz  
 FIDRES 0.094190 Hz  
 AQ 5.3084660 sec  
 RG 57  
 DW 81.000 usec  
 DE 6.00 usec  
 TE 300.0 K  
 D1 1.00000000 sec  
 TD0 1

===== CHANNEL f1 =====  
 NUC1 1H  
 P1 13.15 usec  
 PL1 0.00 dB  
 SFO1 300.1318534 MHz

F2 - Processing parameters  
 SI 32768  
 SF 300.1300000 MHz  
 WDW EM  
 SSB 0  
 LB 0.30 Hz  
 GB 0  
 PC 1.00

<sup>1</sup>H-NMR Spectra of Compound 91



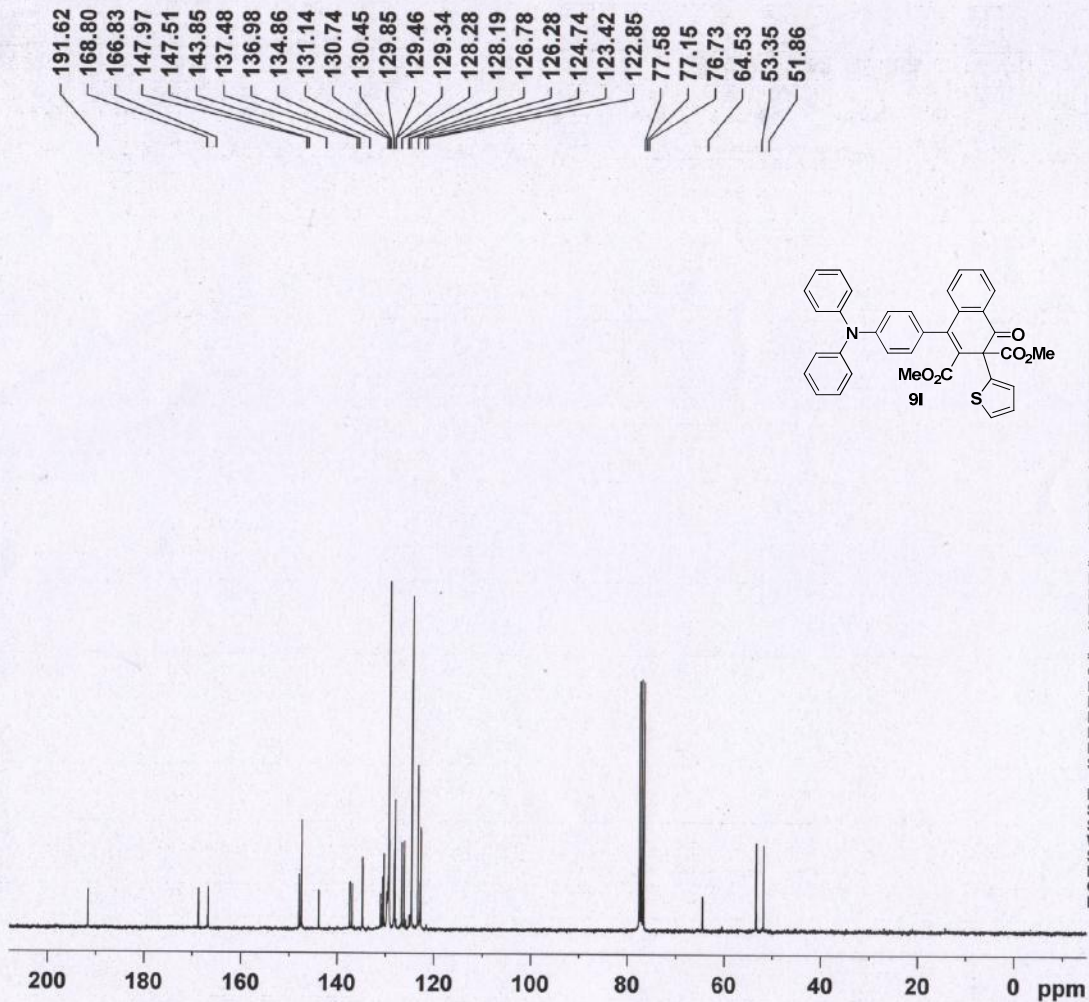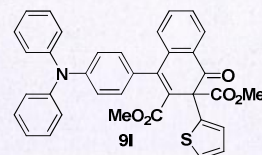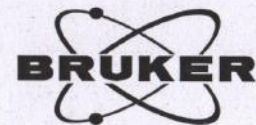

Current Data Parameters  
 NAME JK-B-37B  
 EXPNO 3  
 PROCNO 1

F2 - Acquisition Parameters  
 Date\_ 20150324  
 Time 21.54  
 INSTRUM spect  
 PROBHD 5 mm DUL 13C-1  
 PULPROG zgpg30  
 TD 65536  
 SOLVENT CDCl3  
 NS 1100  
 DS 4  
 SWH 17985.611 Hz  
 FIDRES 0.274439 Hz  
 AQ 1.8219508 sec  
 RG 5160.6  
 DW 27.800 usec  
 DE 6.00 usec  
 TE 300.0 K  
 D1 2.00000000 sec  
 d11 0.03000000 sec  
 DELTA 1.89999998 sec  
 TDO 1

===== CHANNEL f1 =====  
 NUC1 13C  
 P1 9.30 usec  
 PL1 0.00 dB  
 SFO1 75.4752953 MHz

===== CHANNEL f2 =====  
 CPDPRG2 waitz16  
 NUC2 1H  
 PCPD2 80.00 usec  
 PL2 0.00 dB  
 PL12 15.68 dB  
 PL13 16.00 dB  
 SFO2 300.1312005 MHz

F2 - Processing parameters  
 SI 32768  
 SF 75.4677490 MHz  
 WDW EM  
 SSB 0  
 LB 1.00 Hz  
 GB 0  
 PC 1.40

<sup>13</sup>C-NMR Spectra of Compound 9I

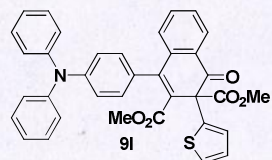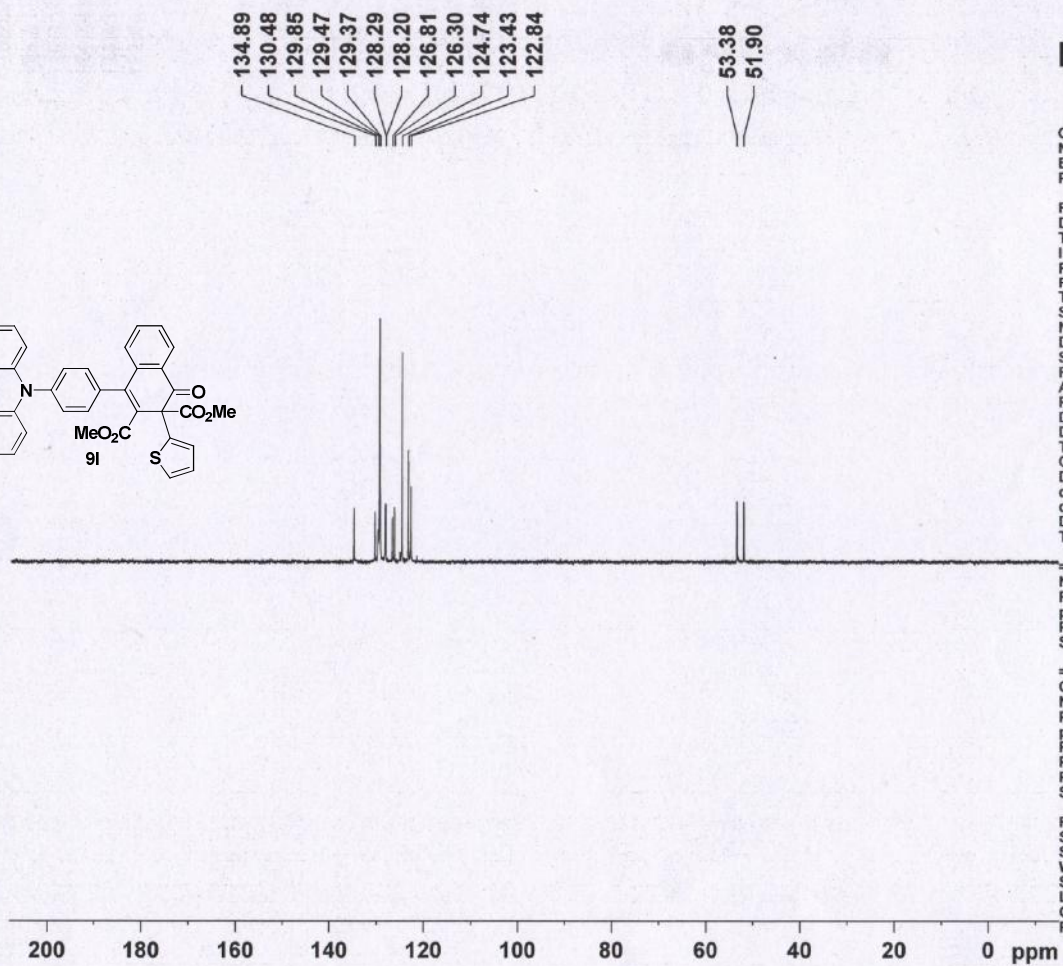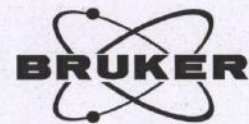

Current Data Parameters  
NAME JK-B-37B  
EXPNO 2  
PROCNO 1

F2 - Acquisition Parameters  
Date\_ 20150324  
Time 20.42  
INSTRUM spect  
PROBHD 5 mm DUL 13C-1  
PULPROG dept135  
TD 65536  
SOLVENT CDCl3  
NS 150  
DS 4  
SWH 17985.611 Hz  
FIDRES 0.274439 Hz  
AQ 1.8219508 sec  
RG 16384  
DW 27.800 usec  
DE 6.00 usec  
TE 300.0 K  
CNST2 145.000000  
D1 2.00000000 sec  
d2 0.00344828 sec  
d12 0.00002000 sec  
DELTA 0.00001184 sec  
TD0 1

===== CHANNEL f1 =====  
NUC1 13C  
P1 9.30 usec  
p2 18.60 usec  
PL1 0.00 dB  
SFO1 75.4752953 MHz

===== CHANNEL f2 =====  
CPDPRG2 waltz16  
NUC2 1H  
P3 13.15 usec  
p4 26.30 usec  
PCPD2 80.00 usec  
PL2 0.00 dB  
PL12 15.68 dB  
SFO2 300.1312005 MHz

F2 - Processing parameters  
SI 32768  
SF 75.4677490 MHz  
WDW EM  
SSB 0  
LB 1.00 Hz  
GB 0  
PC 1.40

DEPT-135 NMR Spectra of Compound 91

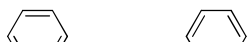

8.112  
8.005  
7.928  
7.906  
7.656  
7.632  
7.603  
7.521  
7.483  
7.466  
7.367  
7.343  
7.322  
7.296  
7.269  
7.242  
7.215  
7.185  
7.157  
7.117  
7.001  
4.370  
4.350  
4.328  
3.797  
3.791  
3.289  
3.271  
2.297  
1.952  
1.934  
1.488  
1.444  
1.420  
1.382  
1.344  
1.328  
1.302  
0.933  
0.901  
0.883

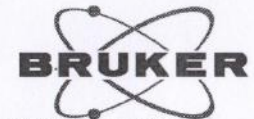

Current Data Parameters  
NAME MN-E-N-HXYL-TOL-REARRANGE  
EXPNO 6  
PROCNO 1

F2 - Acquisition Parameters  
Date\_ 20140524  
Time 14.55  
INSTRUM spect  
PROBHD 5 mm DUL 13C-1  
PULPROG zg30  
TD 65536  
SOLVENT CDCl3  
NS 16  
DS 2  
SWH 6172.839 Hz  
FIDRES 0.084190 Hz  
AQ 5.3084650 sec  
RG 40.3  
DW 81.000 usec  
DE 6.00 usec  
TE 300.0 K  
D1 1.00000000 sec  
TD0 1

===== CHANNEL f1 =====  
NUC1 1H  
P1 13.15 usec  
PL1 0.00 dB  
SFO1 300.1318534 MHz

F2 - Processing parameters  
SI 32758  
SF 300.1300207 MHz  
WDW EM  
SSB 0  
LB 0.30 Hz  
GB 0  
PC 1.00

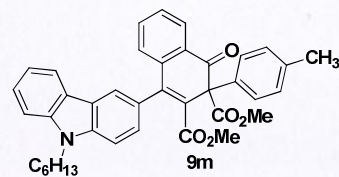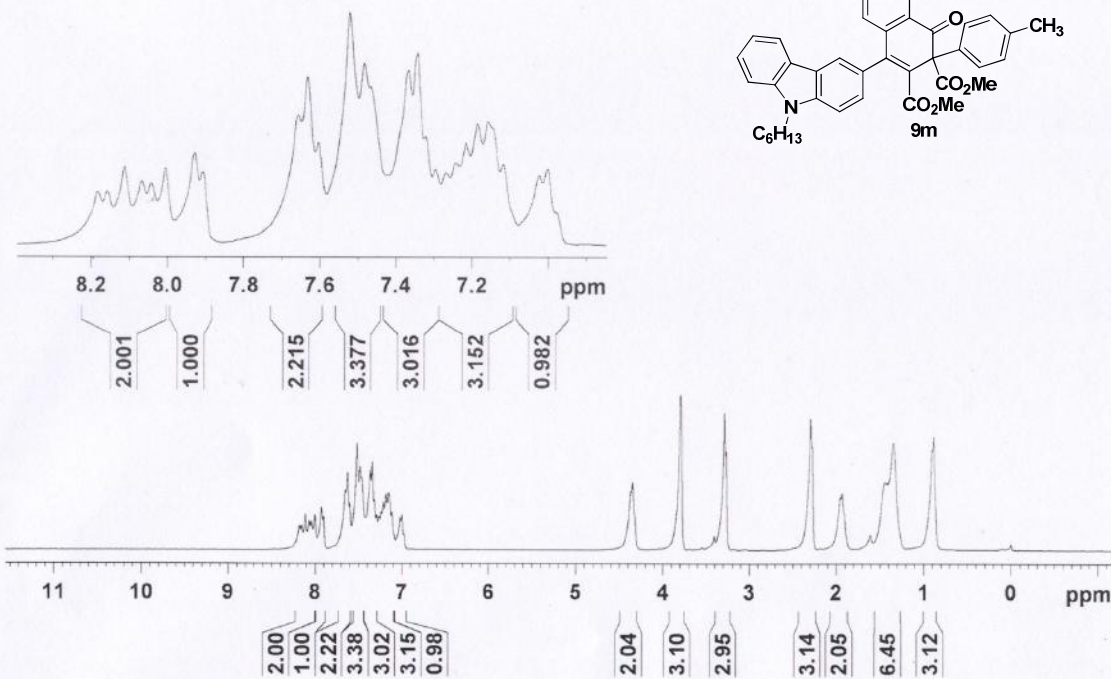

<sup>1</sup>H-NMR Spectra of Compound 9m



194.39  
169.88  
167.70  
144.63  
140.94  
140.87  
140.33  
140.23  
138.32  
138.22  
134.31  
131.37  
129.92  
129.37  
128.98  
127.52  
126.69  
126.13  
123.00  
122.80  
122.69  
120.95  
120.70  
120.61  
119.15  
108.96  
108.79  
108.58  
77.54  
77.11  
76.69  
68.25  
53.05  
51.72  
43.36  
31.63  
29.05  
27.07  
22.60  
21.08  
14.04

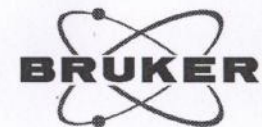

Current Data Parameters  
NAME MN-E-N-HXYL-TOL-REARRANGE  
EXPNO 2  
PROCNO 1

F2 - Acquisition Parameters  
Date\_ 20140524  
Time 14.39  
INSTRUM spect  
PROBHD 5 mm DUL 13C-1  
PULPROG zgpg30  
TD 65536  
SOLVENT CDCl3  
NS 414  
DS 4  
SWH 17985.611 Hz  
FIDRES 0.274439 Hz  
AQ 1.8219508 sec  
RG 4096  
DW 27.800 usec  
DE 6.00 usec  
TE 300.0 K  
D1 2.00000000 sec  
d11 0.03000000 sec  
DELTA 1.89999998 sec  
TD0 1

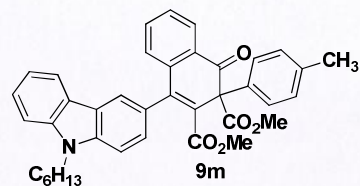

===== CHANNEL f1 =====  
NUC1 13C  
P1 9.30 usec  
PL1 0.00 dB  
SFO1 75.4752953 MHz

===== CHANNEL f2 =====  
CPDPRG2 waltz16  
NUC2 1H  
PCPD2 90.00 usec  
PL2 0.00 dB  
PL12 15.68 dB  
PL13 16.00 dB  
SFO2 300.1312005 MHz

F2 - Processing parameters  
SI 32768  
SF 75.4677490 MHz  
WDW EM  
SSB 0  
LB 1.00 Hz  
GB 0  
PC 1.40

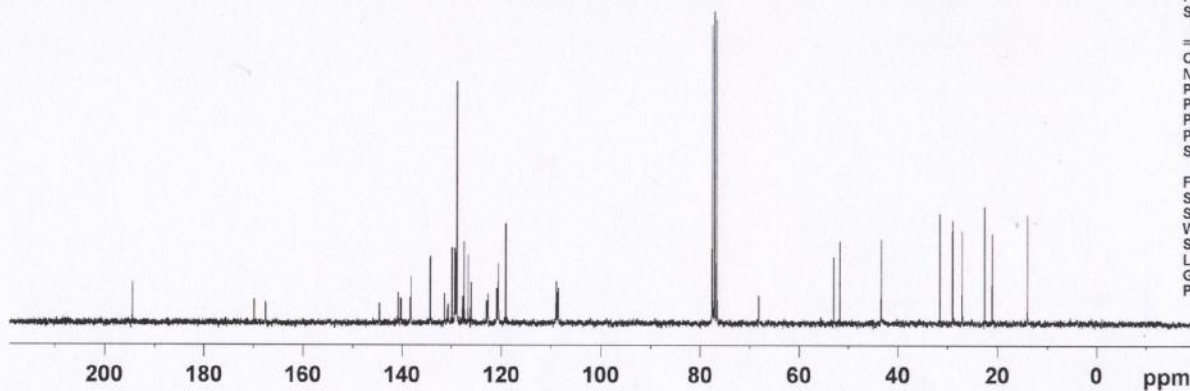

<sup>13</sup>C-NMR Spectra of Compound 9m



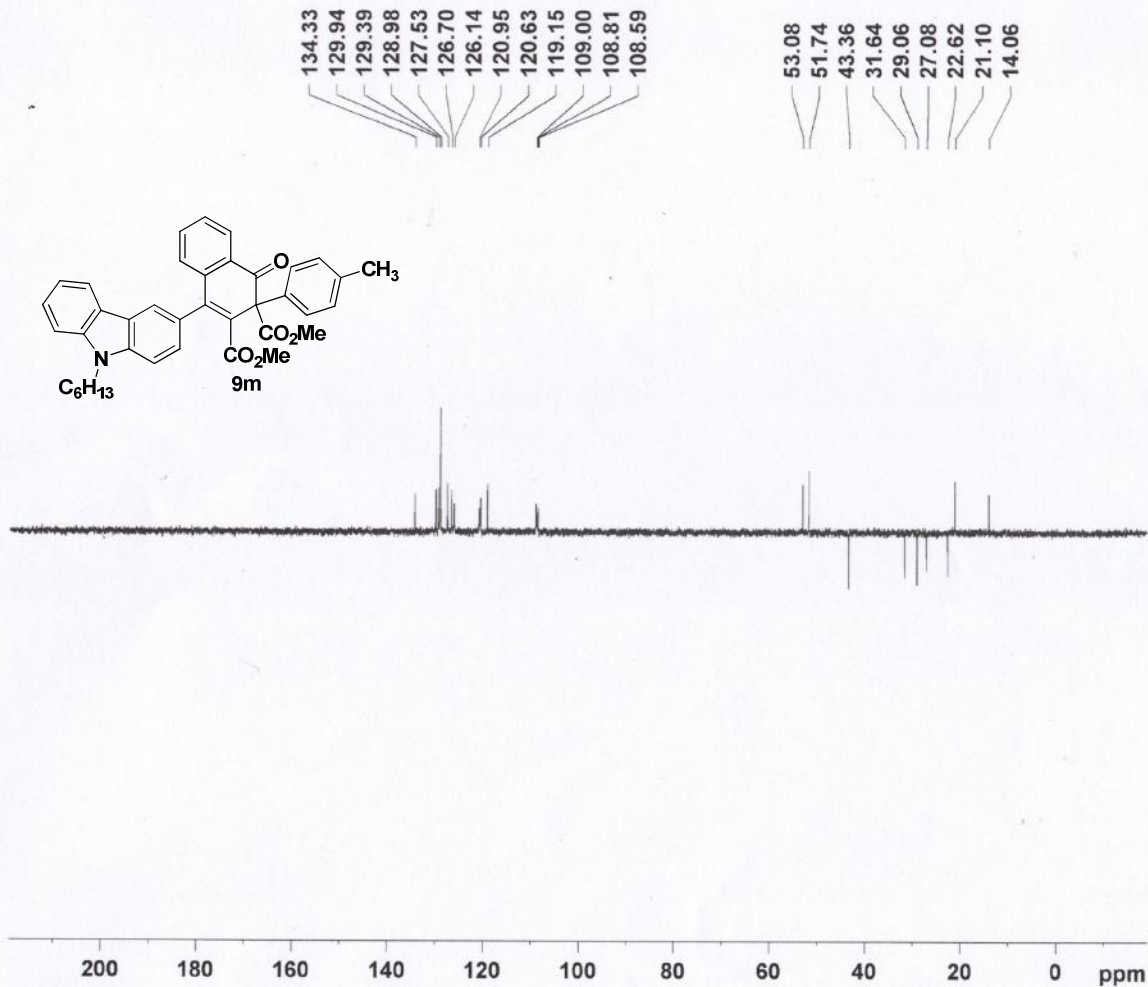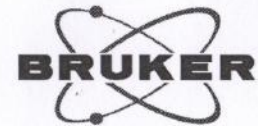

Current Data Parameters  
 NAME MN-E-N-HXYL-TOL-REARRANGE  
 EXPNO 4  
 PROCNO 1

F2 - Acquisition Parameters  
 Date\_ 20140524  
 Time 14.46  
 INSTRUM spect  
 PROBHD 5 mm DUL 13C-1  
 PULPROG dept135  
 TD 65536  
 SOLVENT CDCl3  
 NS 103  
 DS 4  
 SWH 17985.611 Hz  
 FIDRES 0.274439 Hz  
 AQ 1.8219508 sec  
 RG 16384  
 DW 27.800 usec  
 DE 6.00 usec  
 TE 300.0 K  
 CNST2 145.000000  
 D1 2.00000000 sec  
 d2 0.00344828 sec  
 d12 0.00002000 sec  
 DELTA 0.00001184 sec  
 TD0 1

===== CHANNEL f1 =====  
 NUC1 13C  
 P1 9.30 usec  
 p2 18.60 usec  
 PL1 0.00 dB  
 SFO1 75.4752953 MHz

===== CHANNEL f2 =====  
 CPDPRG2 waltz16  
 NUC2 1H  
 P3 13.15 usec  
 p4 26.30 usec  
 PCPD2 80.00 usec  
 PL2 0.00 dB  
 PL12 15.68 dB  
 SFO2 300.1312005 MHz

F2 - Processing parameters  
 SI 32768  
 SF 75.4677490 MHz  
 WDW EM  
 SSB 0  
 LB 1.00 Hz  
 GB 0  
 PC 1.40

DEPT-135 NMR Spectra of Compound 9m

8.021  
7.957  
7.932  
7.906  
7.425  
7.397  
7.373  
7.348  
7.323  
7.299  
7.273  
7.241  
7.216  
7.193  
7.184  
7.165  
7.147  
6.988  
6.967  
6.856  
6.841  
4.284  
4.263  
4.242  
3.753  
3.735  
3.193  
3.184  
1.865  
1.844  
1.822  
1.370  
1.355  
1.327  
1.286  
1.267  
1.246  
1.222  
0.811  
0.791  
0.770

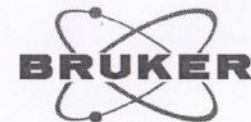

Current Data Parameters  
NAME JK-B-NHC-THI-RA  
EXPNO 4  
PROCNO 1

F2 - Acquisition Parameters  
Date\_ 20151116  
Time 16.33  
INSTRUM spect  
PROBHD 5 mm DUL 13C-1  
PULPROG zg30  
TD 65536  
SOLVENT CDCl3  
NS 16  
DS 2  
SWH 6172.839 Hz  
FIDRES 0.094190 Hz  
AQ 5.3084660 sec  
RG 35.9  
DW 81.000 usec  
DE 6.00 usec  
TE 300.0 K  
D1 1.00000000 sec  
TD0 1

===== CHANNEL f1 =====  
NUC1 1H  
P1 13.88 usec  
PL1 0.00 dB  
SFO1 300.1318534 MHz

F2 - Processing parameters  
SI 32768  
SF 300.1300444 MHz  
WDW EM  
SSB 0  
LB 0.30 Hz  
GB 0  
PC 1.00

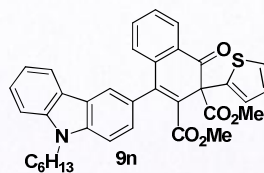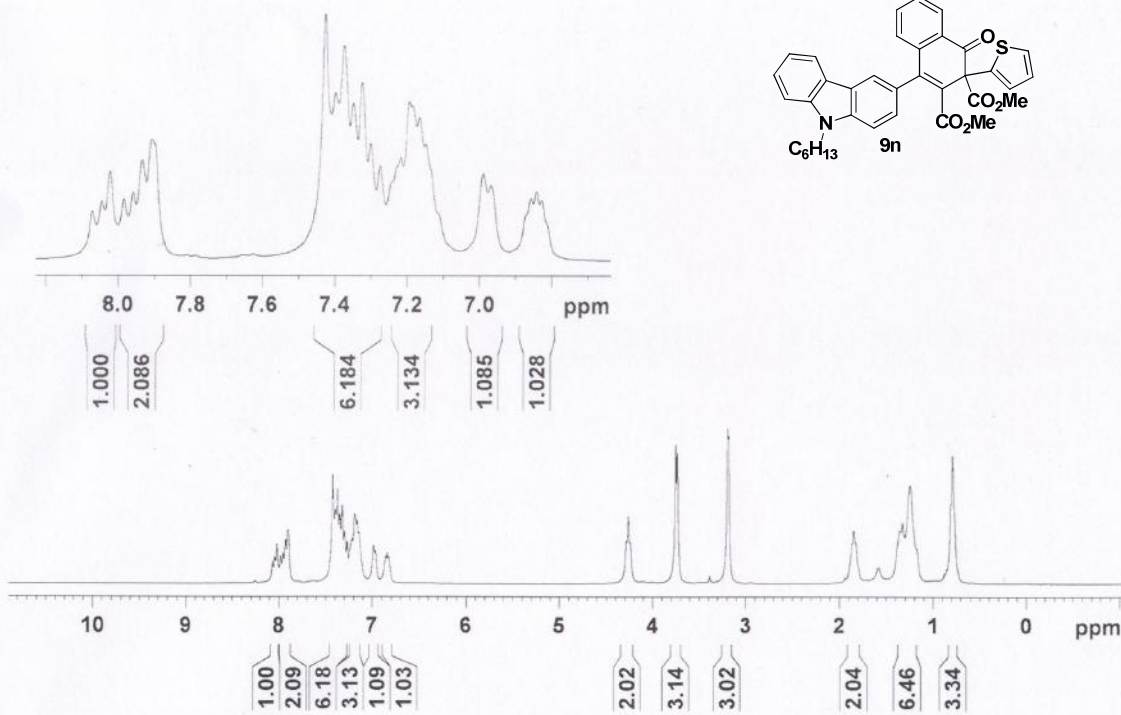

<sup>1</sup>H-NMR Spectra of Compound 9n

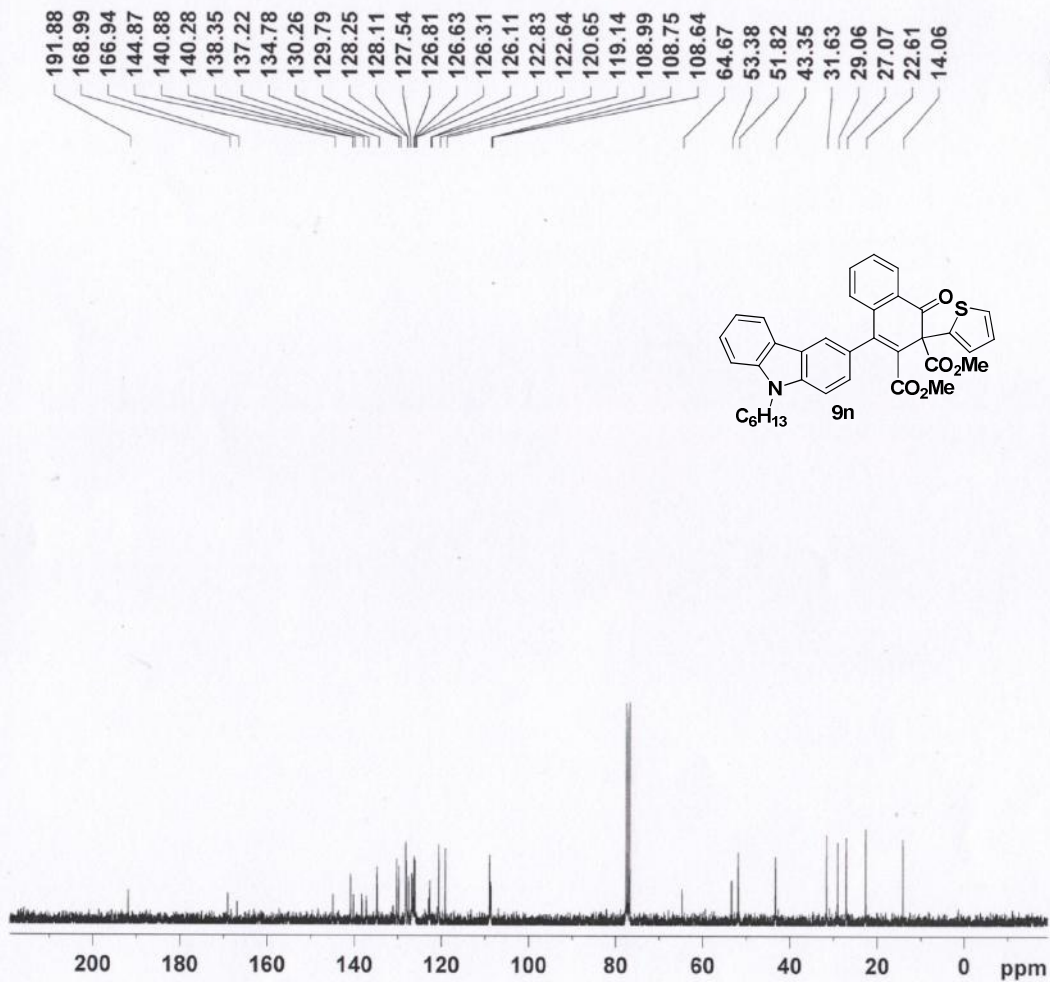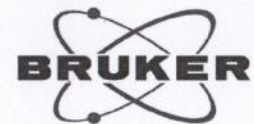

Current Data Parameters  
 NAME SKMN-43  
 EXPNO 2  
 PROCNO 1

F2 - Acquisition Parameters  
 Date\_ 20100803  
 Time\_ 17.17  
 INSTRUM spect  
 PROBHD 5 mm DUL 13C-1  
 PULPROG zgpg30  
 TD 65536  
 SOLVENT CDCl3  
 NS 61  
 DS 4  
 SWH 17985.611 Hz  
 FIDRES 0.274439 Hz  
 AQ 1.6219508 sec  
 RG 574.7  
 DW 27.800 usec  
 DE 6.00 usec  
 TE 300.0 K  
 D1 2.0000000 sec  
 d11 0.0300000 sec  
 DELTA 1.89999998 sec  
 TD0 1

===== CHANNEL f1 =====  
 NUC1 13C  
 P1 7.40 usec  
 PL1 -2.00 dB  
 SFO1 75.4752953 MHz

===== CHANNEL f2 =====  
 CPDPRG2 waltz16  
 NUC2 1H  
 PCPD2 80.00 usec  
 PL2 0.00 dB  
 PL12 15.66 dB  
 PL13 16.00 dB  
 SFO2 300.1312005 MHz

F2 - Processing parameters  
 SI 32768  
 SF 75.4677490 MHz  
 WDW EM  
 SSB 0  
 LB 1.00 Hz

$^{13}C$ -NMR Spectra of Compound **9n**

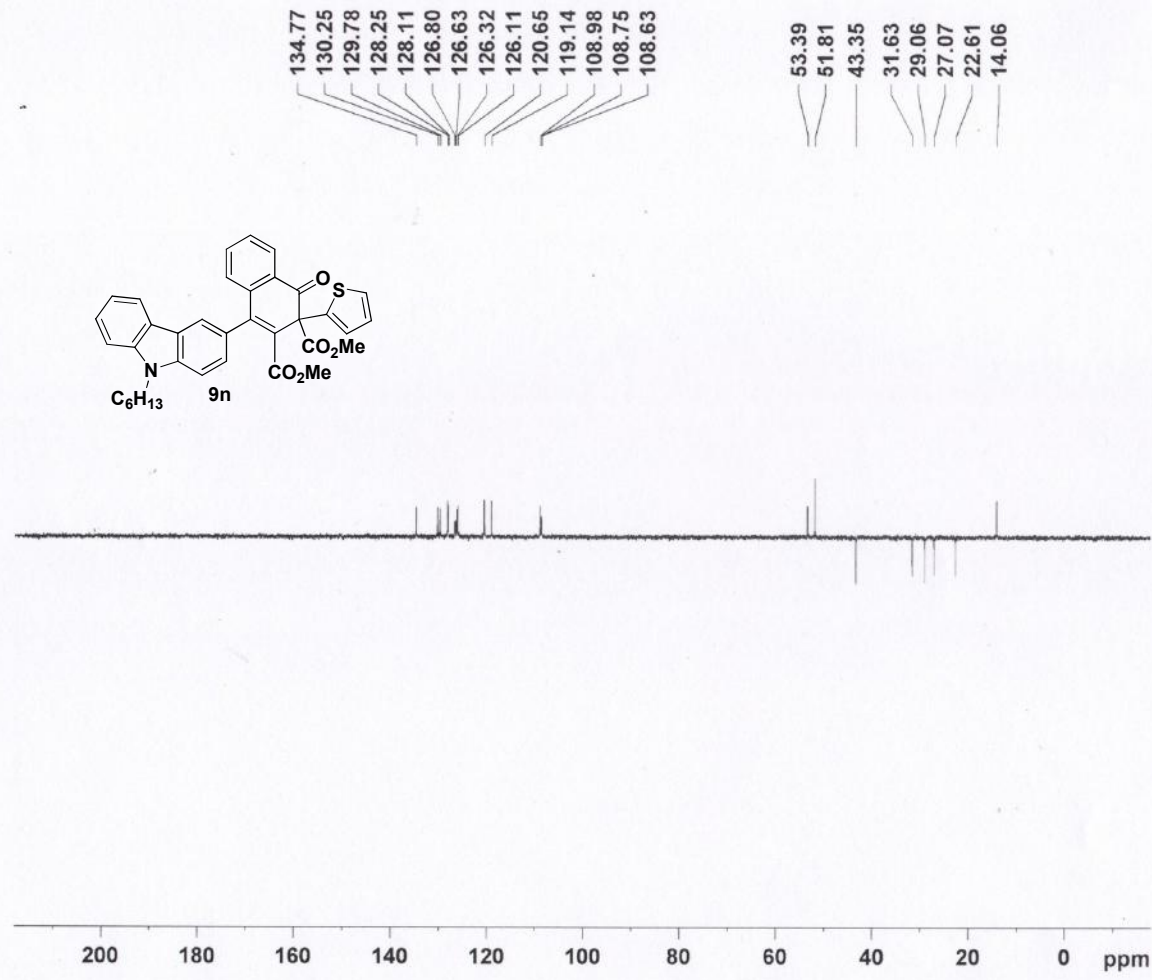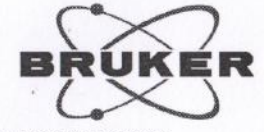

Current Data Parameters  
 NAME SKMN-43  
 EXPNO 3  
 PROCNO 1

F2 - Acquisition Parameters  
 Date\_ 20100803  
 Time 17.24  
 INSTRUM spect  
 PROBHD 5 mm DUL 13C-1  
 PULPROG dept135  
 TD 65536  
 SOLVENT CDCl3  
 NS 40  
 DS 4  
 SWH 17985.611 Hz  
 FIDRES 0.274439 Hz  
 AQ 1.8219508 sec  
 RG 16384  
 DW 27.800 usec  
 DE 6.00 usec  
 TE 300.0 K  
 CNST2 145.0000000  
 D1 2.00000000 sec  
 d2 0.00344828 sec  
 d12 0.00002000 sec  
 DELTA 0.00000942 sec  
 TDO 1

===== CHANNEL f1 =====  
 NUC1 13C  
 P1 7.40 usec  
 p2 14.80 usec  
 PL1 -2.00 dB  
 SFO1 75.4752953 MHz

===== CHANNEL f2 =====  
 CPDPRG2 waltz16  
 NUC2 1H  
 P3 13.15 usec  
 p4 26.30 usec  
 PCPD2 80.00 usec  
 PL2 0.00 dB  
 PL12 15.68 dB  
 SFO2 300.1312005 MHz

F2 - Processing parameters  
 SI 32768  
 SF 75.4677480 MHz  
 WDW EM  
 SSB 0  
 LB 1.00 Hz  
 GB 0  
 PC 1.40

DEPT-135 NMR Spectra of Compound **9n**



8.267  
8.255  
8.167  
8.141  
8.106  
8.080  
7.647  
7.608  
7.588  
7.564  
7.553  
7.516  
7.486  
7.465  
7.452  
7.427  
7.404  
7.342  
7.326  
7.306  
7.289  
7.210  
7.184  
7.013  
6.996  
6.979  
4.340  
4.319  
3.925  
3.906  
3.367  
3.352  
1.541  
1.514  
1.500  
1.426  
1.403  
1.071  
1.063  
1.047  
0.975

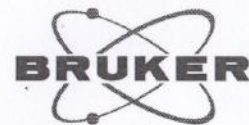

Current Data Parameters  
NAME JK-B-2-ET-NHC-THI-RA  
EXPNO 3  
PROCNO 1

F2 - Acquisition Parameters

Date 20151116  
Time 16.40  
INSTRUM spect  
PROBHD 5 mm DUL 13C-1  
PULPROG zg30  
TD 65536  
SOLVENT CDCl3  
NS 16  
DS 2  
SWH 6172.839 Hz  
FIDRES 0.094190 Hz  
AQ 5.3084660 sec  
RG 14.3  
DW 81.000 usec  
DE 6.00 usec  
TE 300.0 K  
D1 1.00000000 sec  
TD0 1

===== CHANNEL f1 =====  
NUC1 1H  
P1 13.88 usec  
PL1 0.00 dB  
SFO1 300.1318534 MHz

F2 - Processing parameters  
SI 32768  
SF 300.1300000 MHz  
WDW EM  
SSB 0  
LB 0.30 Hz  
GB 0  
PC 1.00

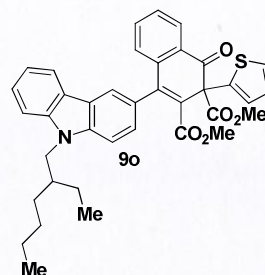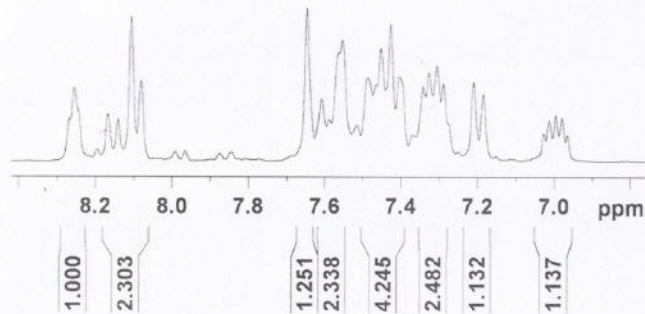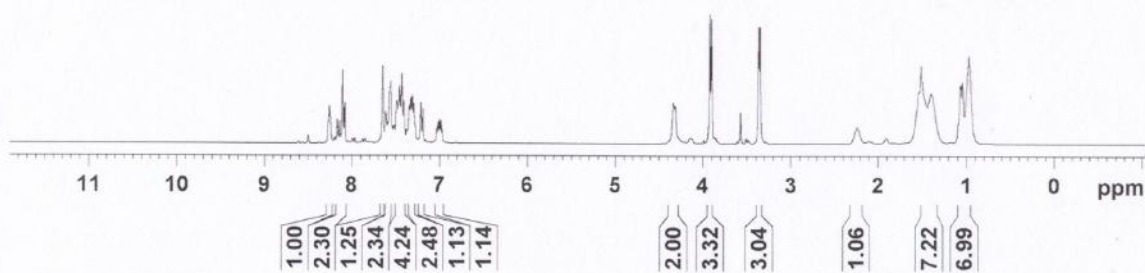

<sup>1</sup>H-NMR Spectra of Compound 9o

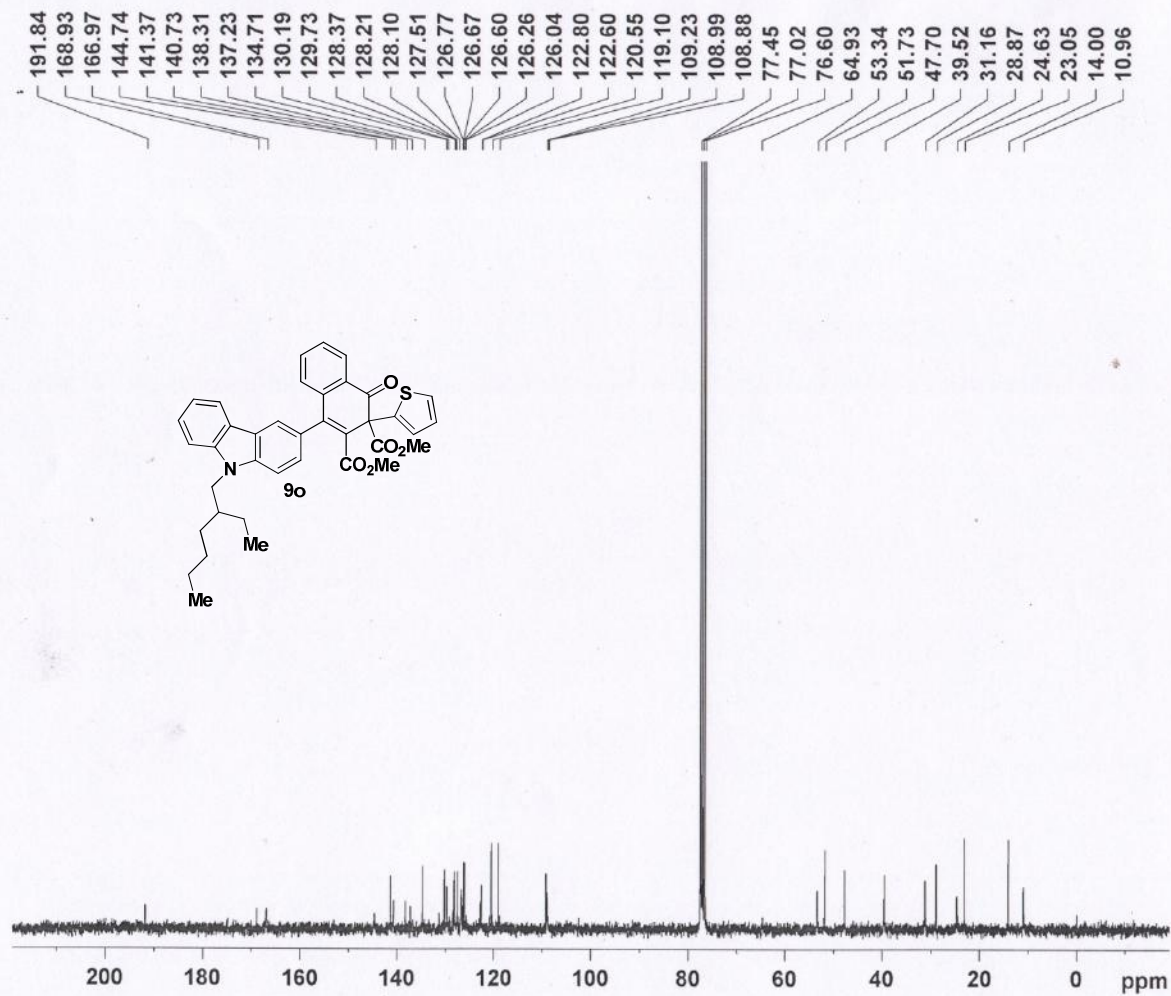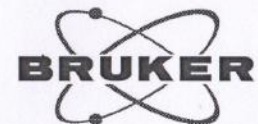

Current Data Parameters  
 NAME MN-E-N-2EH-THI-REARRANGE  
 EXPNO 2  
 PROCNO 1

F2 - Acquisition Parameters  
 Date\_ 20140524  
 Time 15.31  
 INSTRUM spect  
 PROBHD 5 mm DUL 13C-1  
 PULPROG zgpg30  
 TD 66636  
 SOLVENT CDCl3  
 NS 938  
 DS 4  
 SWH 17985.611 Hz  
 FIDRES 0.274439 Hz  
 AQ 1.6219508 sec  
 RG 2896.3  
 DW 27.800 usec  
 DE 6.00 usec  
 TE 300.0 K  
 D1 2.00000000 sec  
 d11 0.03000000 sec  
 DELTA 1.89999998 sec  
 TDO 1

===== CHANNEL f1 =====  
 NUC1 13C  
 P1 9.30 usec  
 PL1 0.00 dB  
 SFO1 75.4752953 MHz

===== CHANNEL f2 =====  
 CPDPRG2 waltz16  
 NUC2 1H  
 PCPD2 80.00 usec  
 PL2 0.00 dB  
 PL12 15.85 dB  
 PL13 15.00 dB  
 SFC2 300.1312005 MHz

F2 - Processing parameters  
 SI 32768  
 SF 75.4677490 MHz  
 WDW EM  
 SSB 0  
 LB 1.00 Hz  
 GB 0  
 PC 1.40

<sup>13</sup>C-NMR Spectra of Compound 9o

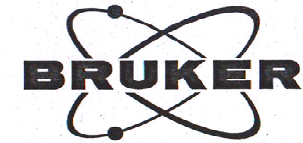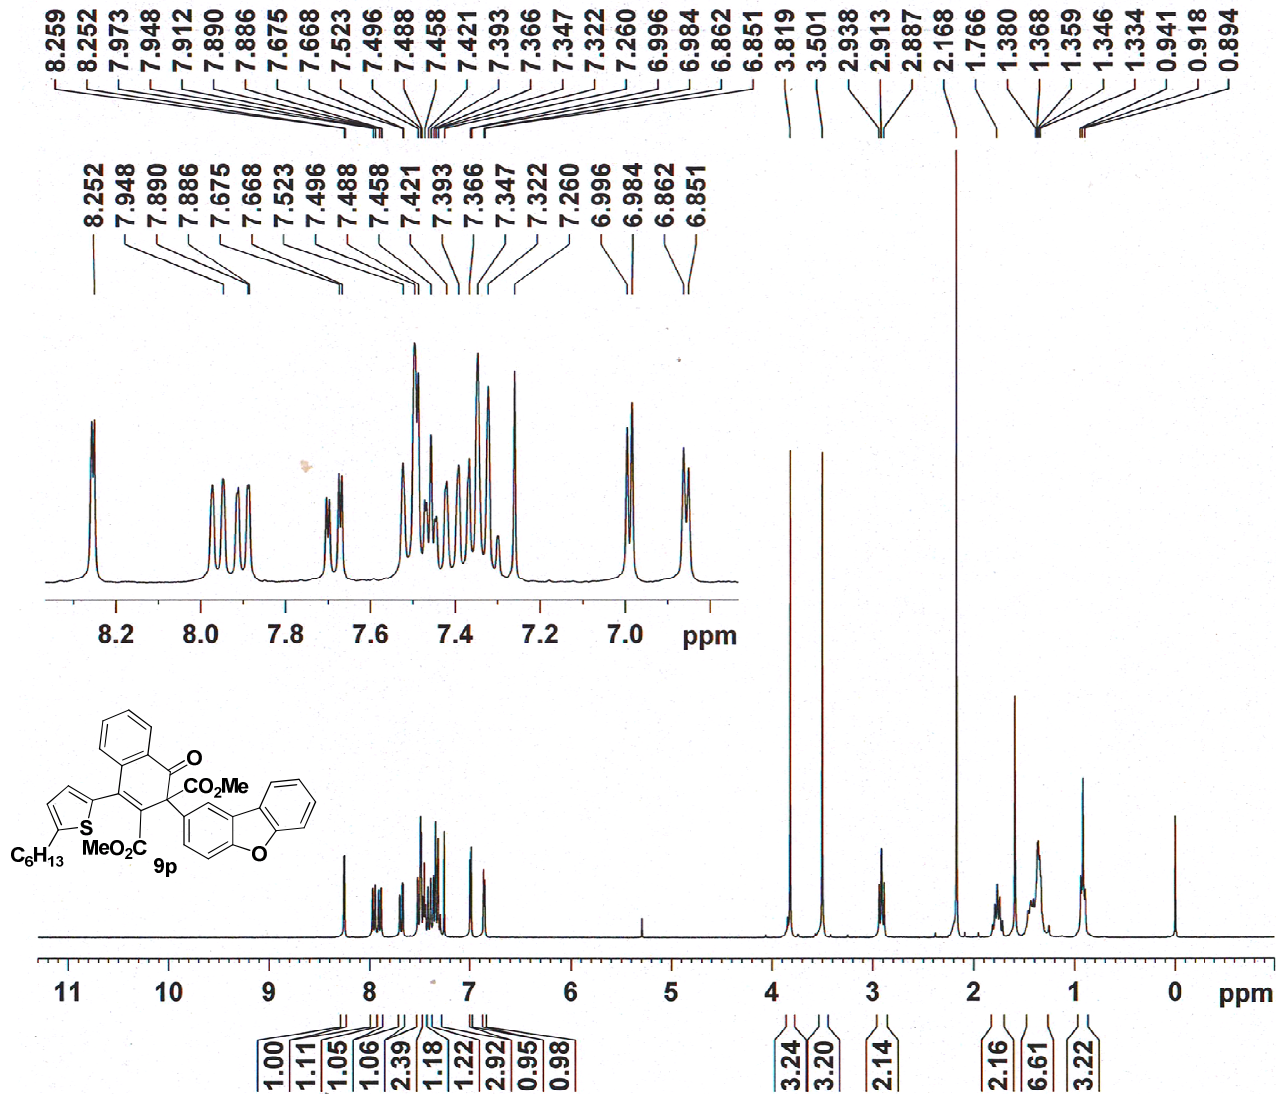

Current Data Parameters  
NAME SKMN-DFAE  
EXPNO 1  
PROCNO 1

F2 - Acquisition Parameters  
Date\_ 20100604  
Time 12.14  
INSTRUM spect  
PROBHD 5 mm DUL 13C-1  
PULPROG zg30  
TD 65536  
SOLVENT CDCl3  
NS 22  
DS 2  
SWH 6172.839 Hz  
FIDRES 0.094190 Hz  
AQ 5.3084660 sec  
RG 161.3  
DW 81.000 usec  
DE 6.00 usec  
TE 300.0 K  
D1 1.00000000 sec  
TD0 1

===== CHANNEL f1 =====  
NUC1 1H  
P1 12.40 usec  
PL1 0.00 dB  
SFO1 300.1318534 MHz

F2 - Processing parameters  
SI 32768  
SF 300.1300063 MHz  
WDW EM  
SSB 0  
LB 0.30 Hz  
GB 0  
PC 1.00

<sup>1</sup>H-NMR Spectra of Compound 9p

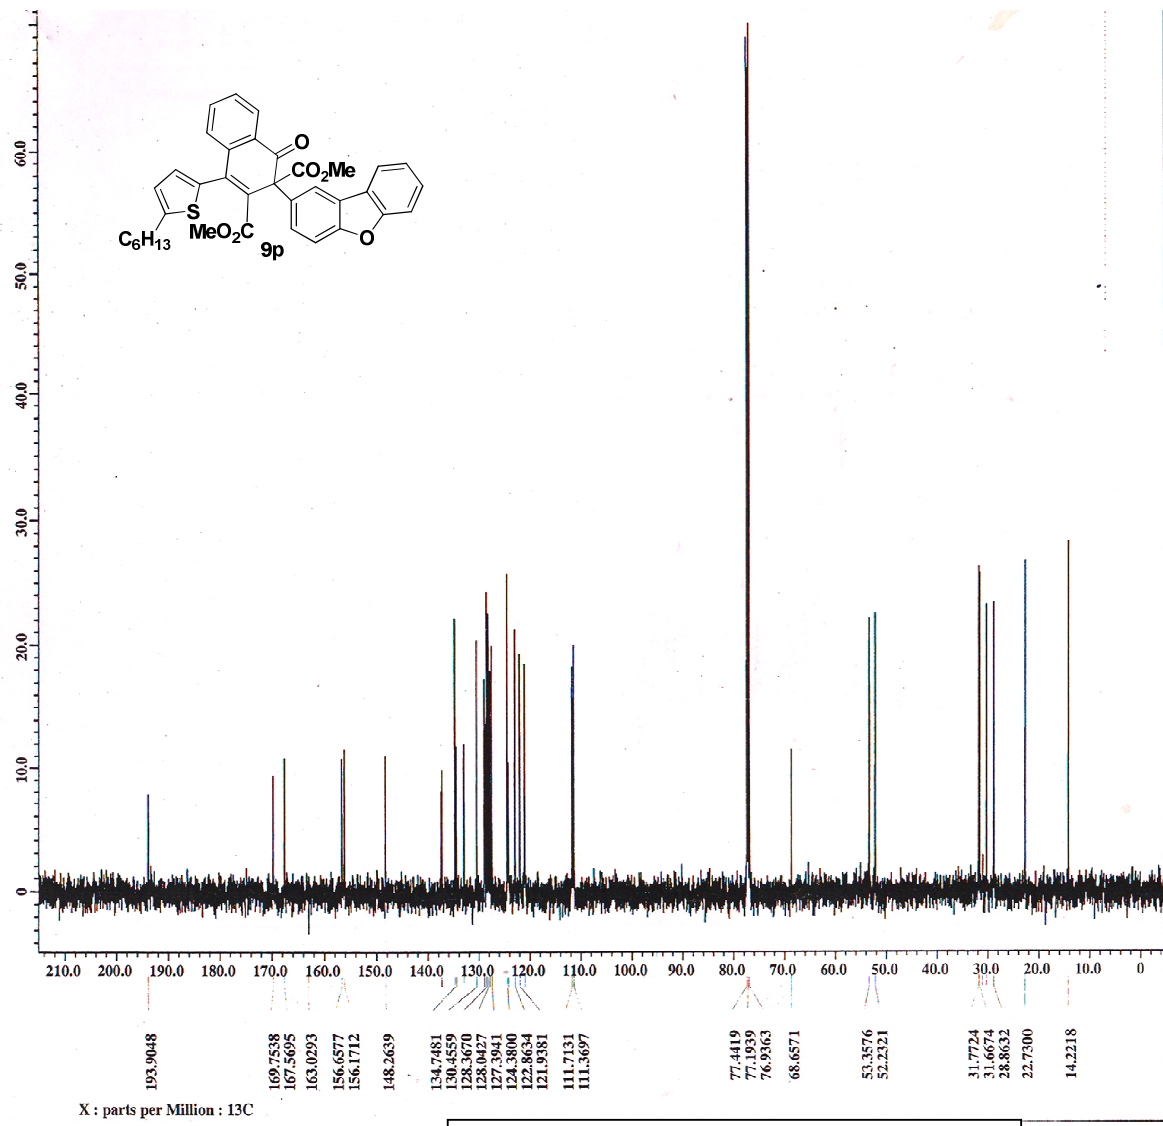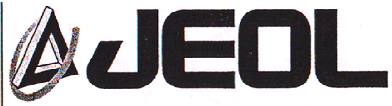

```

Filename      = org_SKMN_13C-3.jdf
Author       = DELTA User
Experiment   = single_pulse_dec
Sample_id    = A_Nandakumar
Solvent      = CHLOROFORM-D
Creation_time = 11-JUN-2010 15:22:40
Revision_time = 11-JUN-2010 16:21:53
Current_time  = 11-JUN-2010 16:22:00

Comment      = single pulse decouple
Data_format  = 1D_COMPLEX
Dim_size     = 26214
Dim_title    = 13C
Dim_units    = [ppm]
Dimensions   = X
Site         = ECA500
Spectrometer = DELTA2_NMR

Field_strength = 11.7473579 [T] (500 [MH
X_acq_duration = 0.83361792 [s]
X_domain       = 13C
X_freq        = 125.76529768 [MHz]
X_offset      = 100 [ppm]
X_points      = 32768
X_prescans    = 4
X_resolution  = 1.19959034 [Hz]
X_sweep       = 39.3081761 [kHz]
X_angle       = 1H
Irr_domain    = 500.15991521 [MHz]
Irr_freq      = 5.0 [ppm]
Irr_offset    = 1
Mod_return    = 112
Scans         = 112
Total_scans   = 112

X_90_width    = 10.2 [us]
X_acq_time    = 0.83361792 [s]
X_angle       = 30 [deg]
X_atn         = 5 [dB]
X_pulse       = 3.4 [us]
Irr_atn_dec   = 22.71303 [dB]
Irr_atn_noe   = 22.49596 [dB]
Irr_noise     = WALTZ
Decoupling    = TRUE
Initial_wait  = 1 [s]
Noe           = TRUE
Noe_time      = 2 [s]
Recvr_gain    = 50
Relaxation_delay = 2 [s]
Repetition_time = 2.83361792 [s]
Temp_get      = 20.9 [dC]
  
```

<sup>13</sup>C-NMR Spectra of Compound 9p



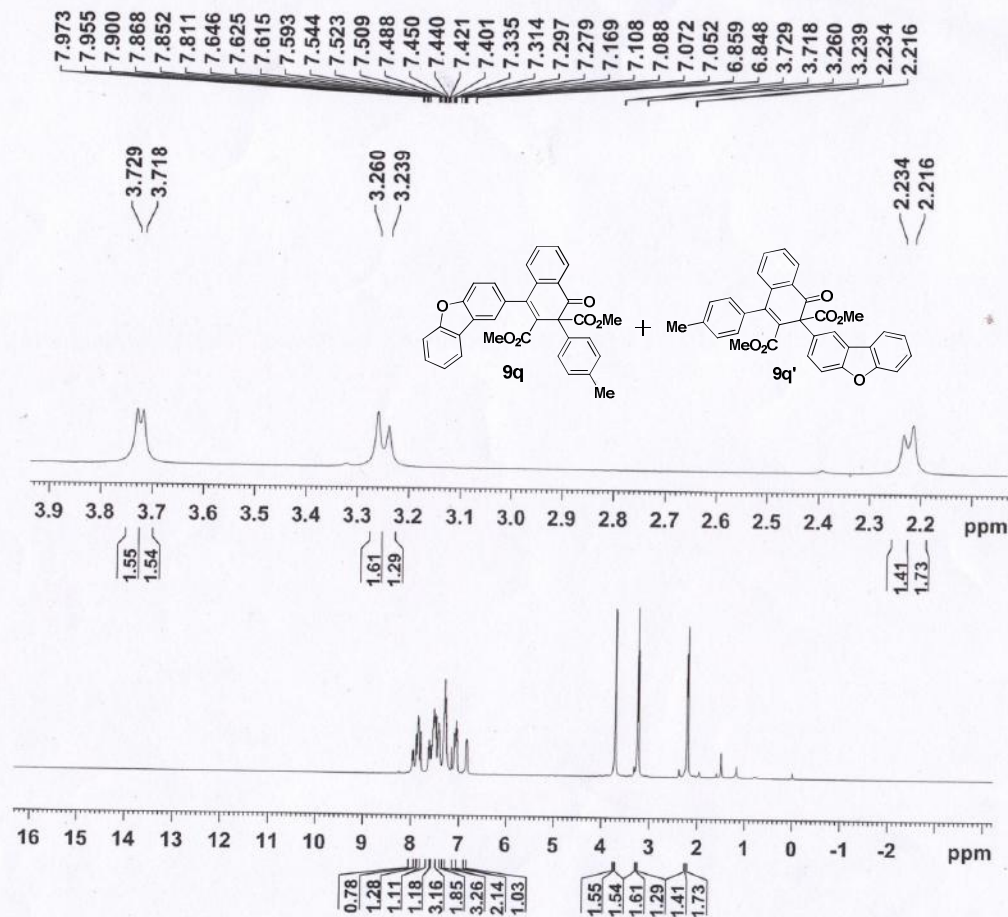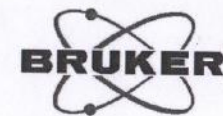

Current Data Parameters  
 NAME JK-B-2  
 EXPNO 17  
 PROCNO 1

F2 - Acquisition Parameters  
 Date 20160118  
 Time 15.25  
 INSTRUM spect  
 PROBHD 5 mm PABBO BB/  
 PULPROG zg30  
 TD 65536  
 SOLVENT CDC13  
 NS 16  
 DS 2  
 SWH 8223.685 Hz  
 FIDRES 0.125483 Hz  
 AQ 3.9845889 sec  
 RG 88.69  
 DW 60.800 usec  
 DE 6.50 usec  
 TE 298.4 K  
 D1 1.00000000 sec  
 TD0 1

----- CHANNEL f1 -----  
 NUC1 1H  
 P1 14.25 usec  
 PLW1 14.00000000 W  
 SFO1 400.2604718 MHz

F2 - Processing parameters  
 SI 65536  
 SF 400.2580482 MHz  
 WDW EM  
 SSB 0  
 LB 0.30 Hz  
 GB 0  
 PC 1.00

<sup>1</sup>H-NMR Spectra of Compound 9q & 9q'

194.12  
194.05  
169.74  
169.65  
167.14  
167.10  
156.71  
156.67  
155.92  
144.07  
143.88  
138.37  
137.87  
137.79  
134.43  
132.16  
131.30  
131.11  
131.02  
130.22  
129.10  
129.06  
128.84  
128.17  
127.92  
127.71  
127.67  
124.71  
124.46  
123.89  
123.85  
123.01  
121.21  
121.06  
121.00  
120.82  
111.96  
111.92  
111.85  
111.74  
68.04  
67.92  
53.14  
51.89  
21.08

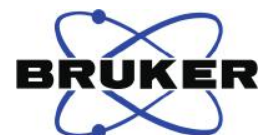

Current Data Parameters  
NAME GSK40116  
EXPNO 21  
PROCNO 1

F2 - Acquisition Parameters  
Date\_ 20160119  
Time 17.00  
INSTRUM spect  
PROBHD 5 mm PABBO BB/  
PULPROG zgpg30  
TD 65536  
SOLVENT CDCl3  
NS 512  
DS 4  
SWH 24038.461 Hz  
FIDRES 0.366798 Hz  
AQ 1.3631488 sec  
RG 63.11  
DW 20.800 usec  
DE 6.50 usec  
TE 299.6 K  
D1 2.0000000 sec  
D11 0.0300000 sec  
TD0 1

===== CHANNEL f1 =====  
NUC1 13C  
P1 9.80 usec  
PLW1 58.0000000 W  
SFO1 100.6550182 MHz

===== CHANNEL f2 =====  
CPDPRG[2] waltz16  
NUC2 1H  
PCPD2 90.00 usec  
PLW2 14.0000000 W  
PLW12 0.35097000 W  
PLW13 0.28428999 W  
SFO2 400.2596010 MHz

F2 - Processing parameters  
SI 32768  
SF 100.6449540 MHz  
WDW EM  
SSB 0  
LB 1.00 Hz  
GB 0  
PC 1.40

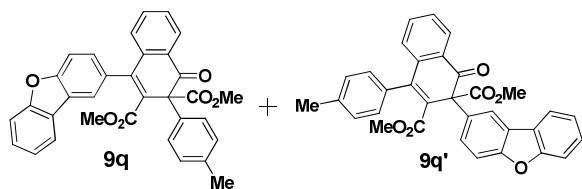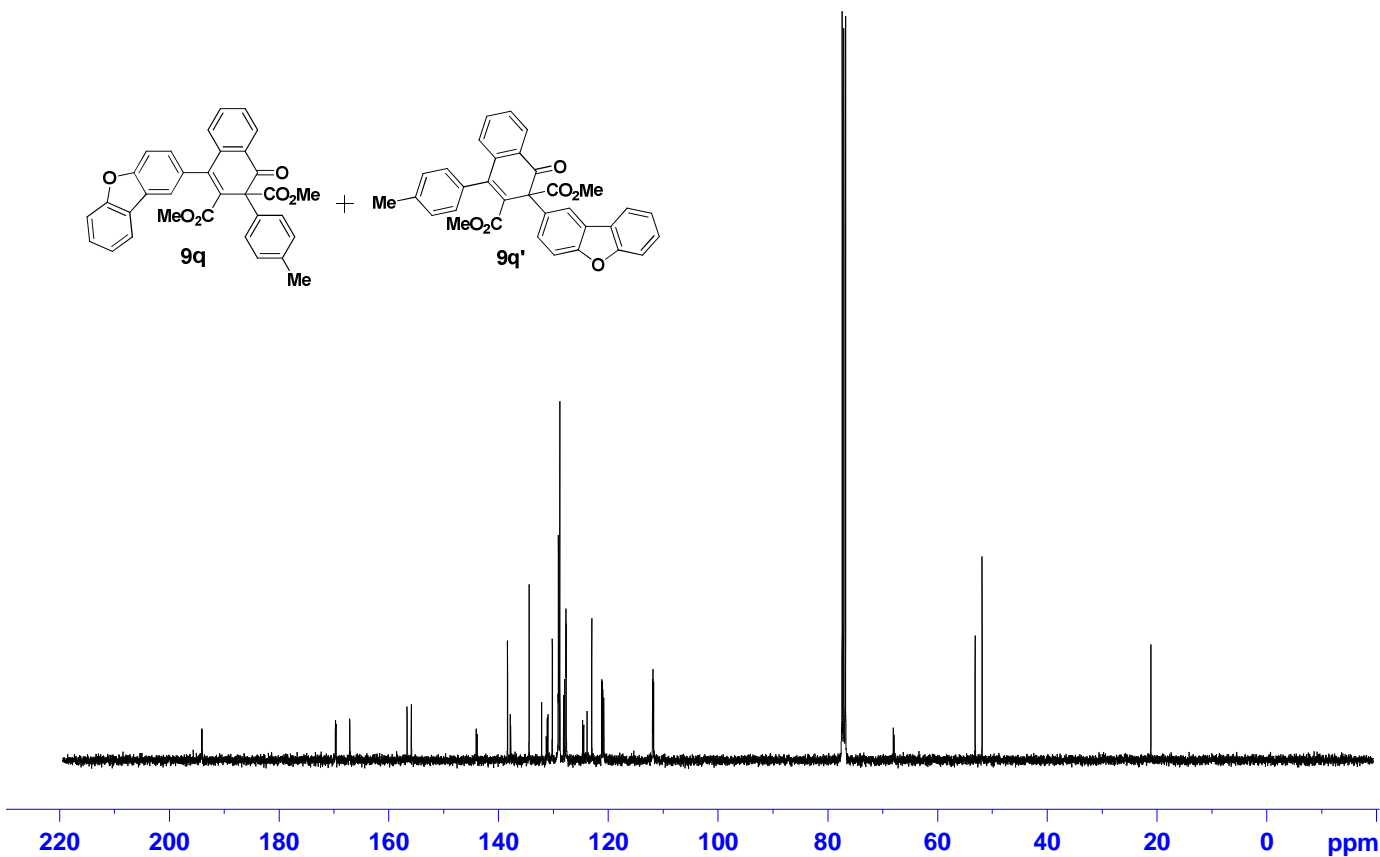

<sup>13</sup>C-NMR Spectra of Compound 9q & 9q'

134.44  
130.23  
129.15  
129.11  
129.07  
128.84  
128.17  
127.92  
127.72  
127.68  
123.01  
121.21  
121.06  
121.00  
120.82  
111.96  
111.92  
111.86  
111.75

53.15  
51.90

21.11  
21.09

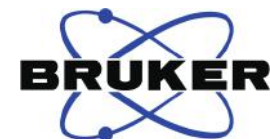

Current Data Parameters  
NAME JK-B-DBF-TOL-RA  
EXPNO 22  
PROCNO 1

F2 - Acquisition Parameters  
Date\_ 20160119  
Time 17.18  
INSTRUM spect  
PROBHD 5 mm PABBO BB/  
PULPROG deptsp135  
TD 65536  
SOLVENT CDCl3  
NS 256  
DS 4  
SWH 16129.032 Hz  
FIDRES 0.246110 Hz  
AQ 2.0316160 sec  
RG 199.6  
DW 31.000 usec  
DE 6.50 usec  
TE 299.2 K  
CNST2 145.0000000  
D1 2.00000000 sec  
D2 0.00344828 sec  
D12 0.00002000 sec  
TD0 1

===== CHANNEL f1 =====  
NUC1 13C  
P1 9.80 usec  
P13 2000.00 usec  
PLW0 0 W  
PLW1 58.00000000 W  
SFO1 100.6530053 MHz  
SPNAM[5] Crp60comp.4  
SPOAL5 0.500  
SPOFFS5 0 Hz  
SPW5 8.51080036 W

===== CHANNEL f2 =====  
CPDPRG[2] waltz16  
NUC2 1H  
P3 14.25 usec  
P4 28.50 usec  
PCPD2 90.00 usec  
PLW2 14.00000000 W  
PLW12 0.35097000 W  
SFO2 400.2592801 MHz

F2 - Processing parameters  
SI 32768  
SF 100.6449540 MHz  
WDW EM  
SSB 0  
LB 1.00 Hz  
GB 0  
PC 1.40

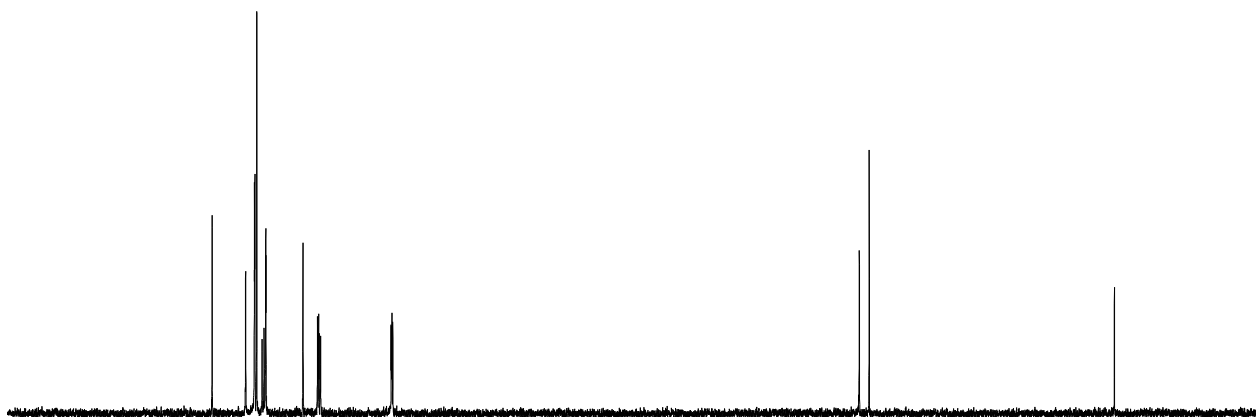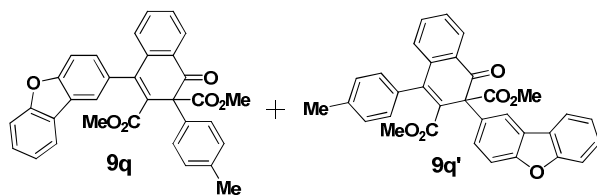

150 140 130 120 110 100 90 80 70 60 50 40 30 20 ppm

DEPT-135 NMR Spectra of Compound **9q** & **9q'**

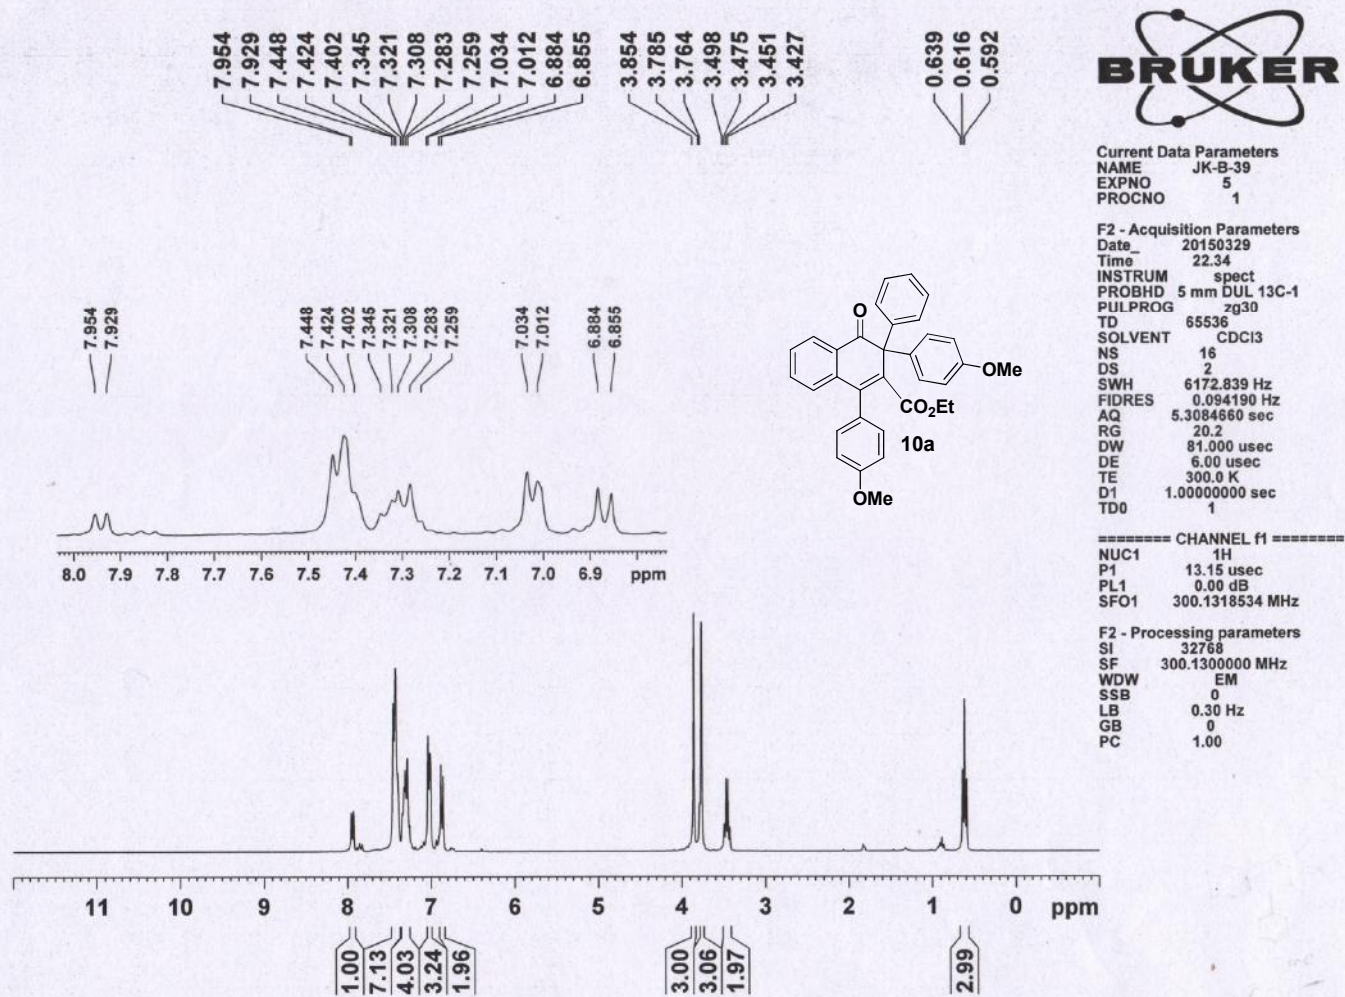

<sup>1</sup>H-NMR Spectra of Compound 10a



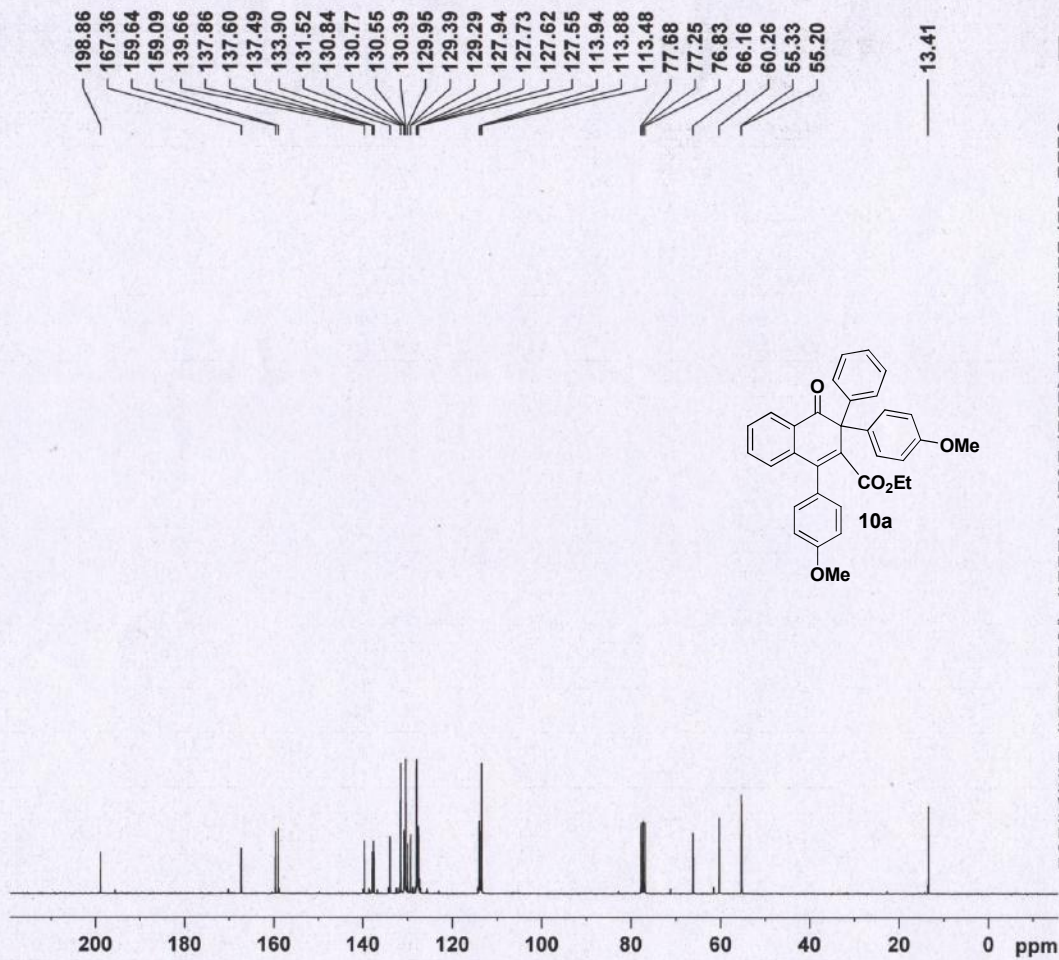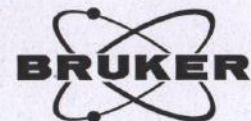

Current Data Parameters  
 NAME JK-B-39  
 EXPNO 4  
 PROCNO 1

F2 - Acquisition Parameters  
 Date\_ 20150329  
 Time 22.32  
 INSTRUM spect  
 PROBHD 5 mm DUL i3C-1  
 PULPROG zgpg30  
 TD 65536  
 SOLVENT CDCl3  
 NS 599  
 DS 4  
 SWH 17985.611 Hz  
 FIDRES 0.274439 Hz  
 AQ 1.8219508 sec  
 RG 1448.2  
 DW 27.800 usec  
 DE 6.00 usec  
 TE 300.0 K  
 D1 2.0000000 sec  
 d11 0.0300000 sec  
 DELTA 1.89999998 sec  
 TD0 1

===== CHANNEL f1 =====  
 NUC1 13C  
 P1 9.30 usec  
 PL1 0.00 dB  
 SFO1 75.4752953 MHz

===== CHANNEL f2 =====  
 CPDPRG2 waltz16  
 NUC2 1H  
 PCPD2 80.00 usec  
 PL2 0.00 dB  
 PL12 15.68 dB  
 PL13 16.00 dB  
 SFO2 300.1312005 MHz

F2 - Processing parameters  
 SI 32768  
 SF 75.4677490 MHz  
 WDW EM  
 SSB 0  
 LB 1.00 Hz  
 GB 0  
 PC 1.40

<sup>13</sup>C-NMR Spectra of Compound 10a

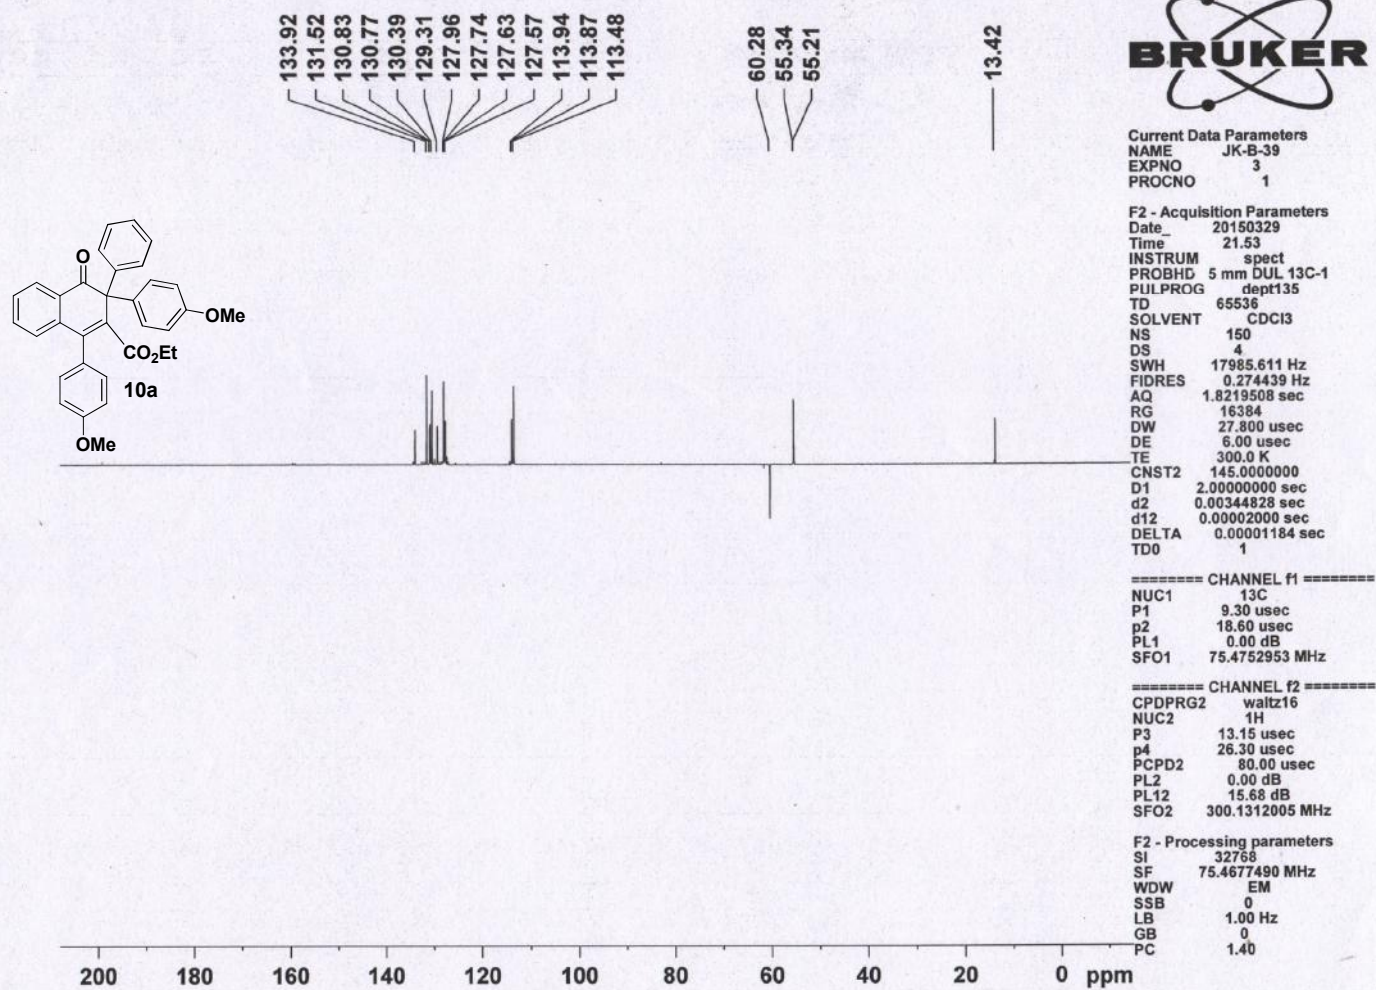

DEPT-135 NMR Spectra of Compound **10a**

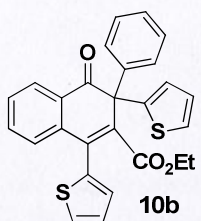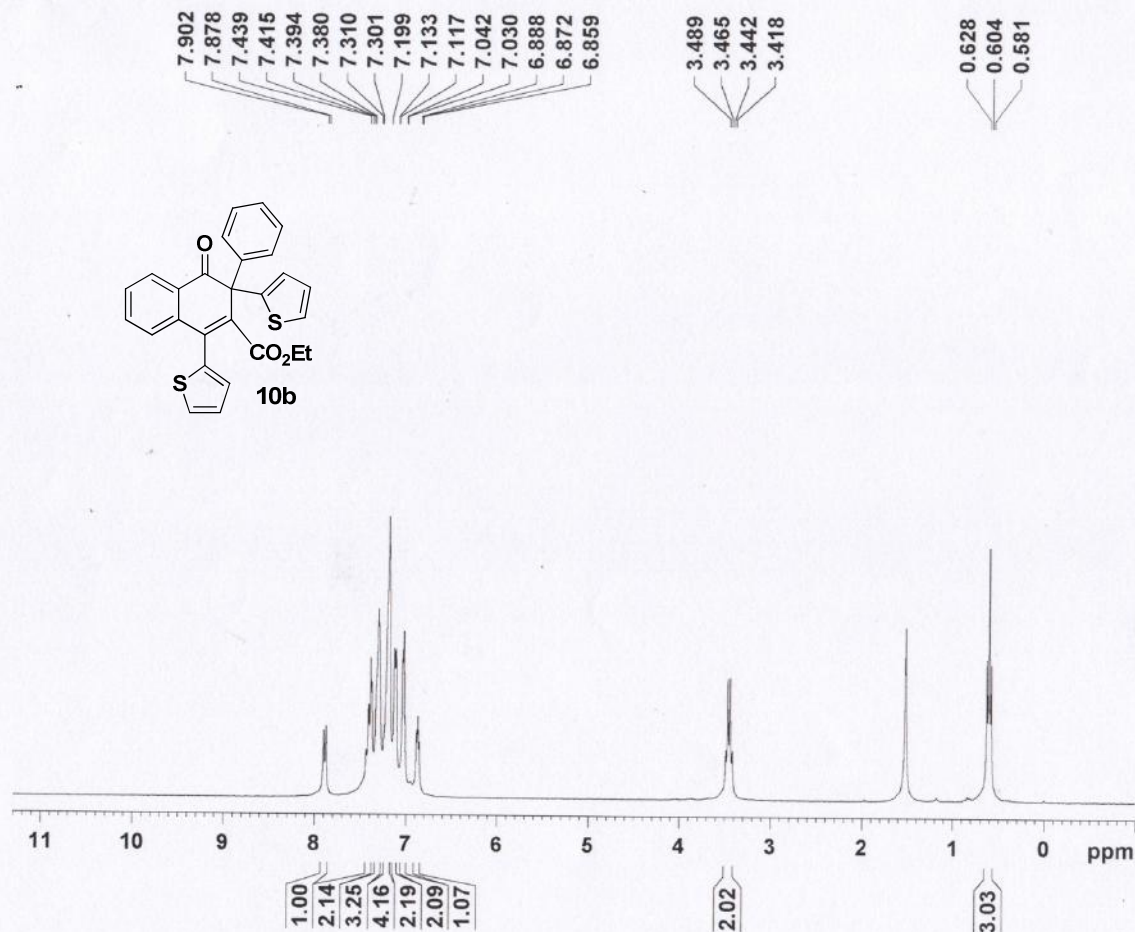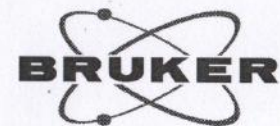

Current Data Parameters  
NAME JK-B-09B  
EXPNO 1  
PROCNO 1

F2 - Acquisition Parameters  
Date\_ 20150922  
Time 20.27  
INSTRUM spect  
PROBHD 5 mm DUL 13C-1  
PULPROG zg30  
TD 65536  
SOLVENT CDCl3  
NS 16  
DS 2  
SWH 6172.839 Hz  
FIDRES 0.094190 Hz  
AQ 5.3084660 sec  
RG 181  
DW 81.000 usec  
DE 6.00 usec  
TE 300.0 K  
D1 1.00000000 sec  
TD0 1

===== CHANNEL f1 =====  
NUC1 1H  
P1 13.88 usec  
PL1 0.00 dB  
SFO1 300.1318534 MHz

F2 - Processing parameters  
SI 32768  
SF 300.1300286 MHz  
WDW EM  
SSB 0  
LB 0.30 Hz  
GB 0  
PC 1.00

<sup>1</sup>H-NMR Spectra of Compound 10b



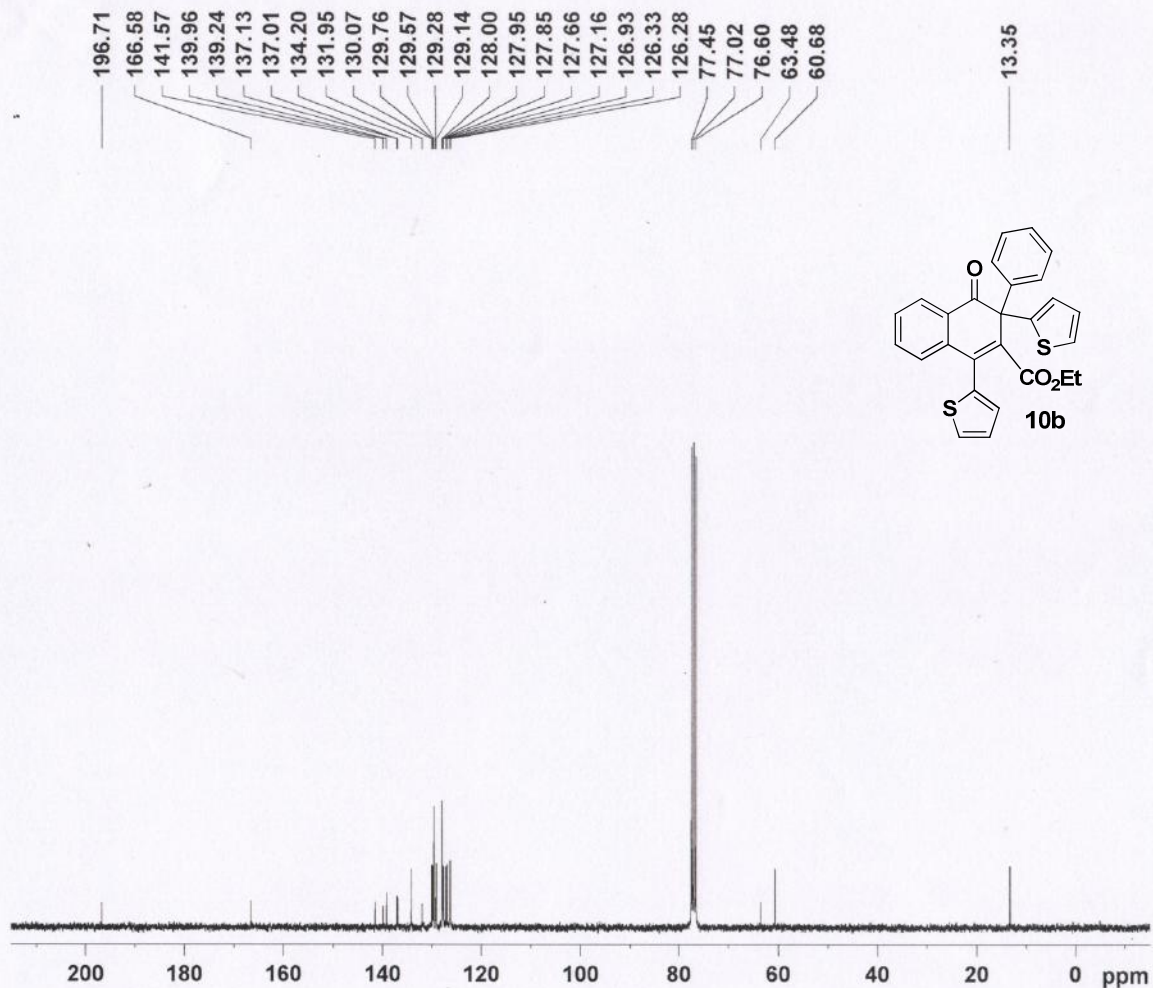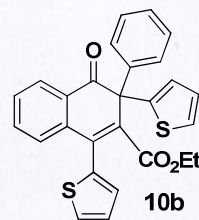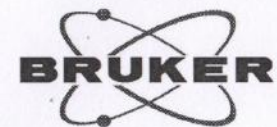

Current Data Parameters  
NAME JK-B-09B  
EXPNO 3  
PROCNO 1

F2 - Acquisition Parameters  
Date\_ 20150922  
Time 20.44  
INSTRUM spect  
PROBHD 5 mm DUL 13C-1  
PULPROG zgpg30  
TD 65536  
SOLVENT CDCl3  
NS 1024  
DS 4  
SWH 17985.611 Hz  
FIDRES 0.274439 Hz  
AQ 1.8219508 sec  
RG 9195.2  
DW 27.900 usec  
DE 6.00 usec  
TE 300.0 K  
D1 2.0000000 sec  
d11 0.0300000 sec  
DELTA 1.89999998 sec  
TD0 1

===== CHANNEL f1 =====  
NUC1 13C  
P1 10.38 usec  
PL1 0.00 dB  
SFO1 75.4752953 MHz

===== CHANNEL f2 =====  
CPDPRG2 waltz16  
NUC2 1H  
PCPD2 80.00 usec  
PL2 0.00 dB  
PL12 15.21 dB  
PL13 16.00 dB  
SFO2 300.1312005 MHz

F2 - Processing parameters  
SI 32768  
SF 75.4677490 MHz  
WDW EM  
SSB 0  
LB 1.00 Hz  
GB 0  
PC 1.40

<sup>13</sup>C-NMR Spectra of Compound **10b**



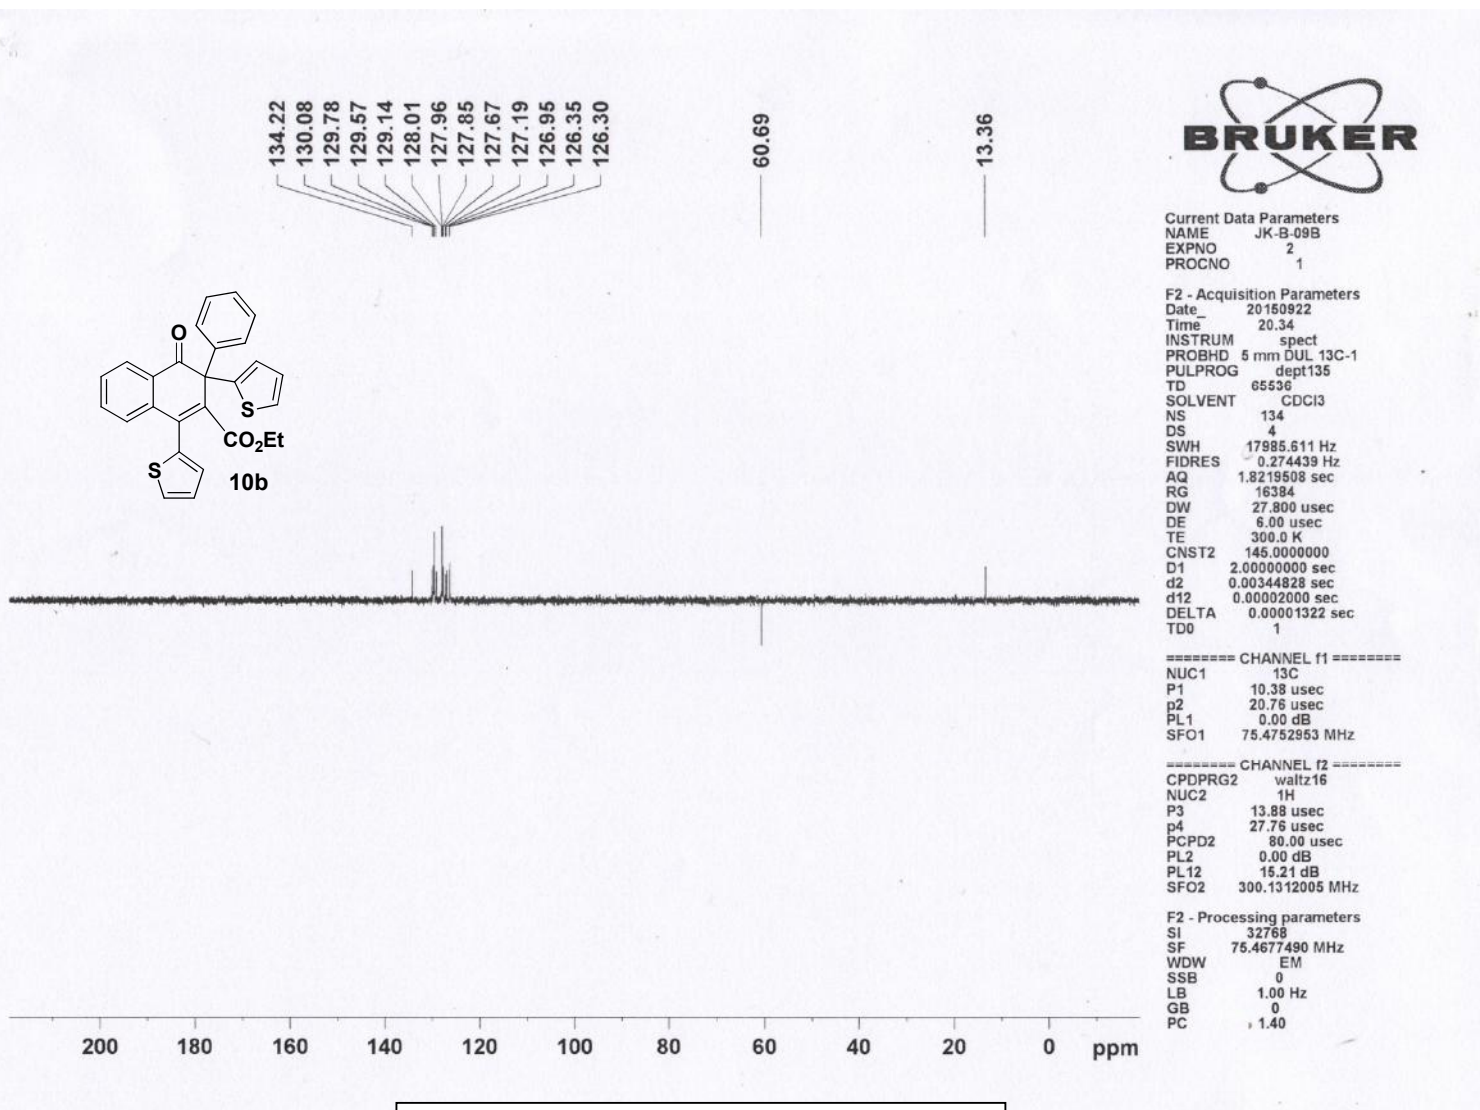

DEPT-135 NMR Spectra of Compound **10b**

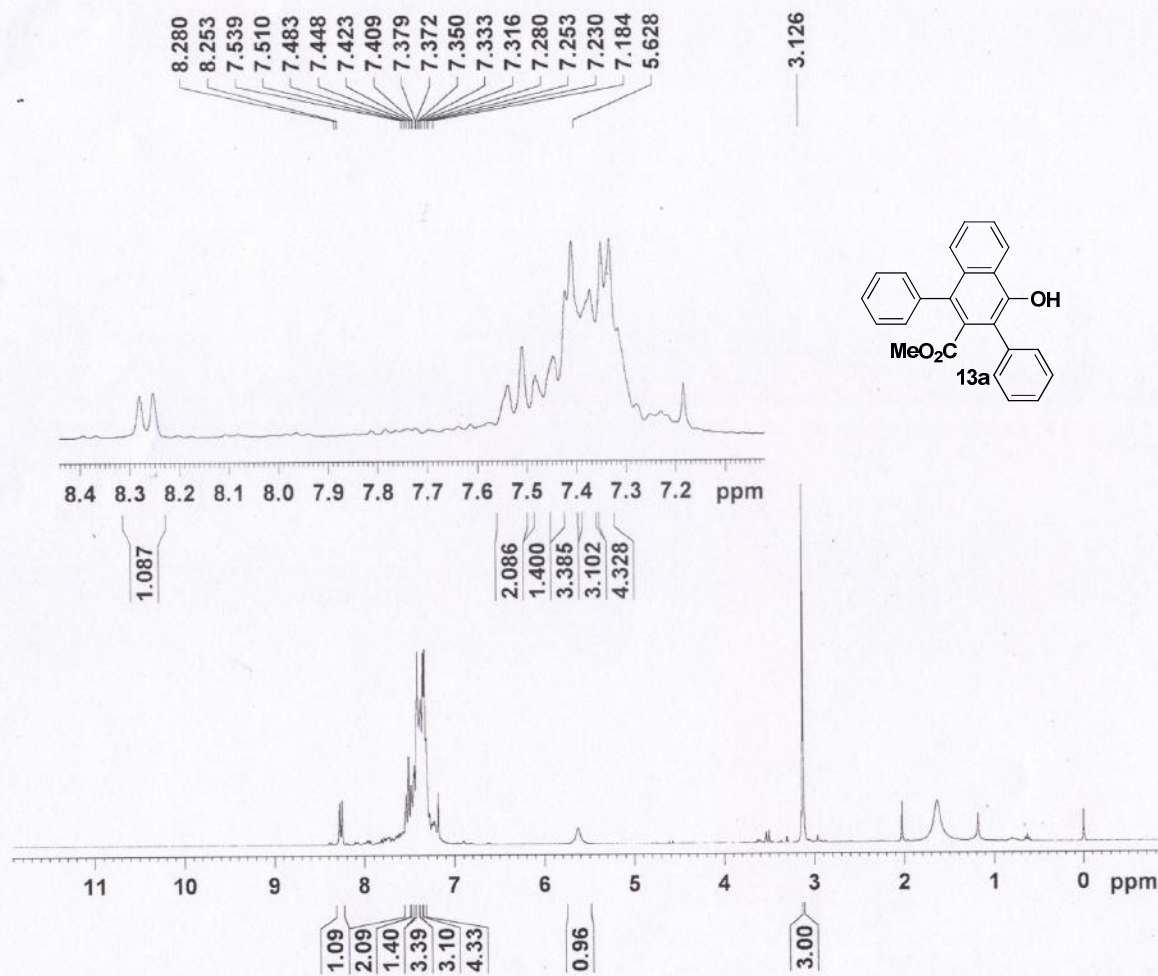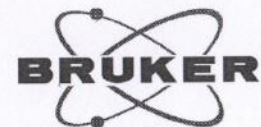

Current Data Parameters  
 NAME JK-B-PHE-NAPH  
 EXPNO 1  
 PROCNO 1

F2 - Acquisition Parameters  
 Date 20151105  
 Time 21.06  
 INSTRUM spect  
 PROBHD 5 mm DUL 13C-1  
 PULPROG zg30  
 TD 65536  
 SOLVENT CDCl3  
 NS 16  
 DS 2  
 SWH 6172.839 Hz  
 FIDRES 0.094190 Hz  
 AQ 5.3084660 sec  
 RG 203.2  
 DW 81.000 usec  
 DE 8.00 usec  
 TE 300.0 K  
 D1 1.00000000 sec  
 TD0 1

===== CHANNEL f1 =====  
 NUC1 1H  
 P1 13.88 usec  
 PL1 0.00 dB  
 SFO1 300.1318534 MHz

F2 - Processing parameters  
 SI 32768  
 SF 300.1300289 MHz  
 WDW EM  
 SSB 0  
 LB 0.30 Hz  
 GB 0  
 PC 1.00

<sup>1</sup>H-NMR Spectra of Compound 13a

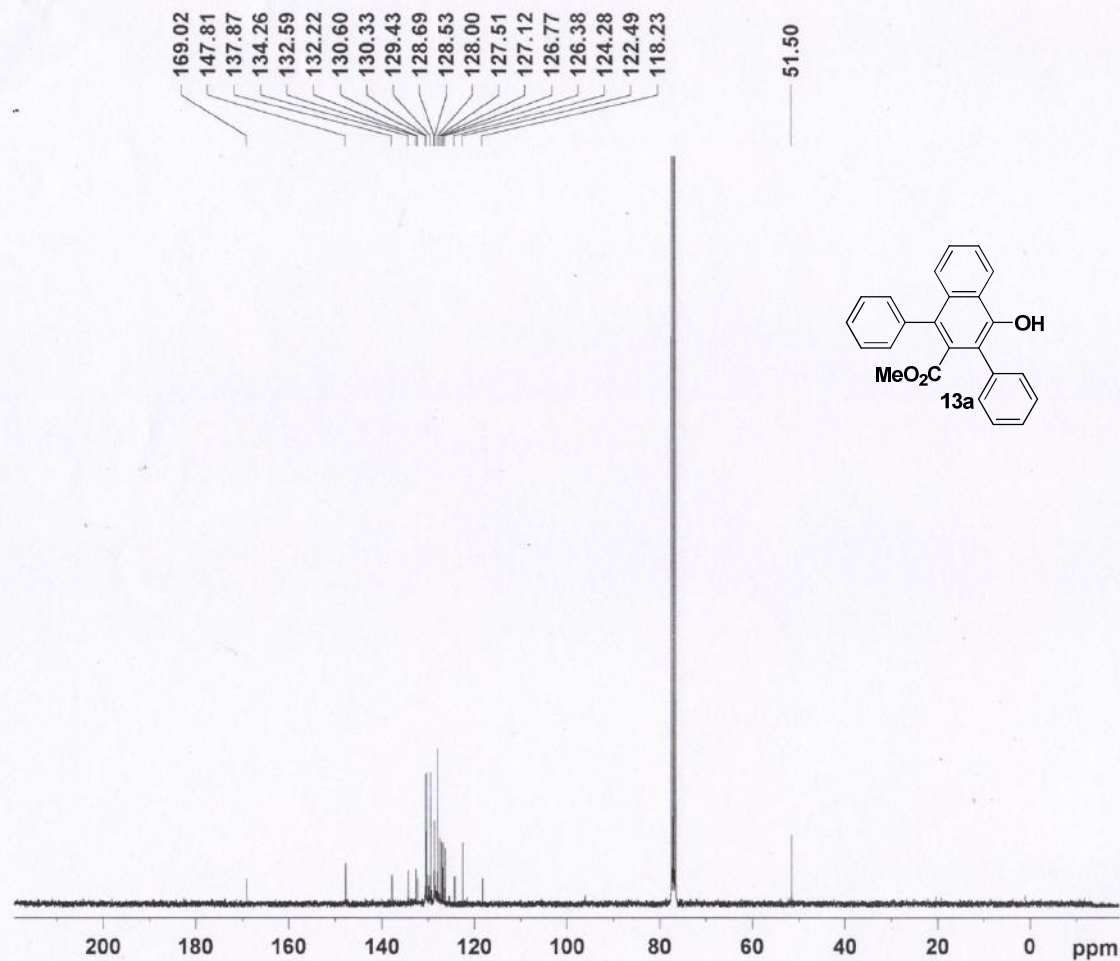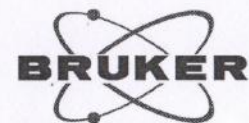

Current Data Parameters  
 NAME JK-B-PHE-NAPH  
 EXPNO 3  
 PROCNO 1

F2 - Acquisition Parameters  
 Date\_ 20151105  
 Time 23.51  
 INSTRUM spect  
 PROBHD 5 mm DUL 13C-1  
 PULPROG zgpg30  
 TD 65536  
 SOLVENT CDCl3  
 NS 2000  
 DS 4  
 SWH 17985.611 Hz  
 FIDRES 0.274439 Hz  
 AQ 1.8219508 sec  
 RG 574.7  
 DW 27.800 usec  
 DE 5.00 usec  
 TE 300.0 K  
 D1 2.0000000 sec  
 d11 0.0300000 sec  
 DELTA 1.89999998 sec  
 TD0 1

===== CHANNEL f1 =====  
 NUC1 13C  
 P1 10.38 usec  
 PL1 0.00 dB  
 SFO1 75.4752953 MHz

===== CHANNEL f2 =====  
 CPDPRG2 waltz16  
 NUC2 1H  
 PCPD2 80.00 usec  
 PL2 0.00 dB  
 PL12 15.21 dB  
 PL13 16.00 dB  
 SFO2 300.1312005 MHz

F2 - Processing parameters  
 SI 32768  
 SF 75.4677490 MHz  
 WDW EM  
 SSB 0  
 LB 1.00 Hz  
 GB 0  
 PC 1.40

<sup>13</sup>C-NMR Spectra of Compound 13a

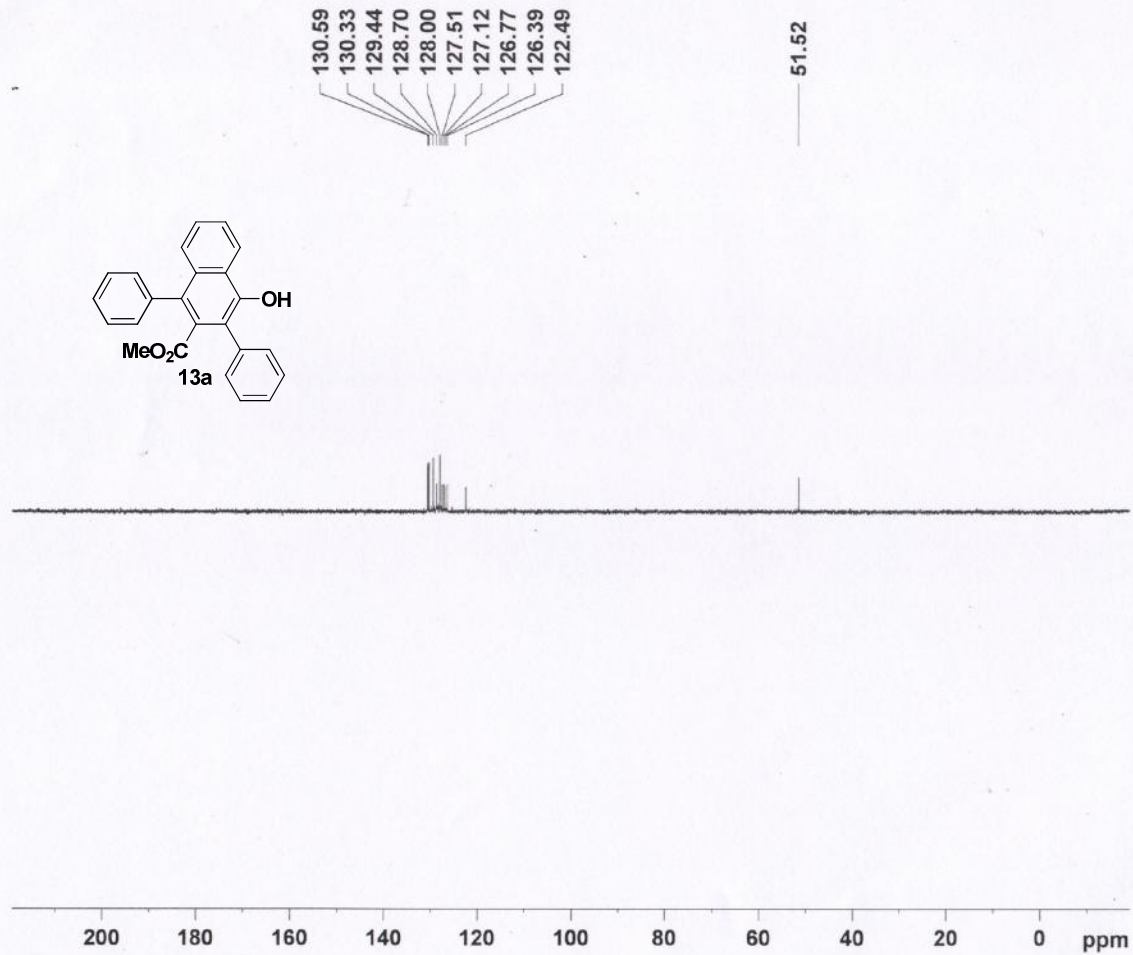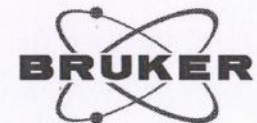

Current Data Parameters  
NAME JK-B-PHE-NAPH  
EXPNO 2  
PROCNO 1

F2 - Acquisition Parameters  
Date\_ 20151105  
Time 21.18  
INSTRUM spect  
PROBHD 5 mm DUL 13C-1  
PULPROG dept135  
TD 65536  
SOLVENT CDCl<sub>3</sub>  
NS 500  
DS 4  
SWH 17985.611 Hz  
FIDRES 0.274439 Hz  
AQ 1.8219508 sec  
RG 16384  
DW 27.800 usec  
DE 6.00 usec  
TE 300.0 K  
CNST2 145.000000  
D1 2.00000000 sec  
d2 0.00344828 sec  
d12 0.00002000 sec  
DELTA 0.00001322 sec  
TD0 1

===== CHANNEL f1 =====  
NUC1 13C  
P1 10.38 usec  
p2 20.76 usec  
PL1 0.00 dB  
SFO1 75.4752953 MHz

===== CHANNEL f2 =====  
CPDPRG2 waltz16  
NUC2 1H  
P3 13.88 usec  
p4 27.76 usec  
PCPD2 80.00 usec  
PL2 0.00 dB  
PL12 15.21 dB  
SFO2 300.1312005 MHz

F2 - Processing parameters  
SI 32768  
SF 75.4677490 MHz  
WDW EM  
SSB 0  
LB 1.00 Hz  
GB 0  
PC 1.40

DEPT-135 NMR Spectra of Compound 13a



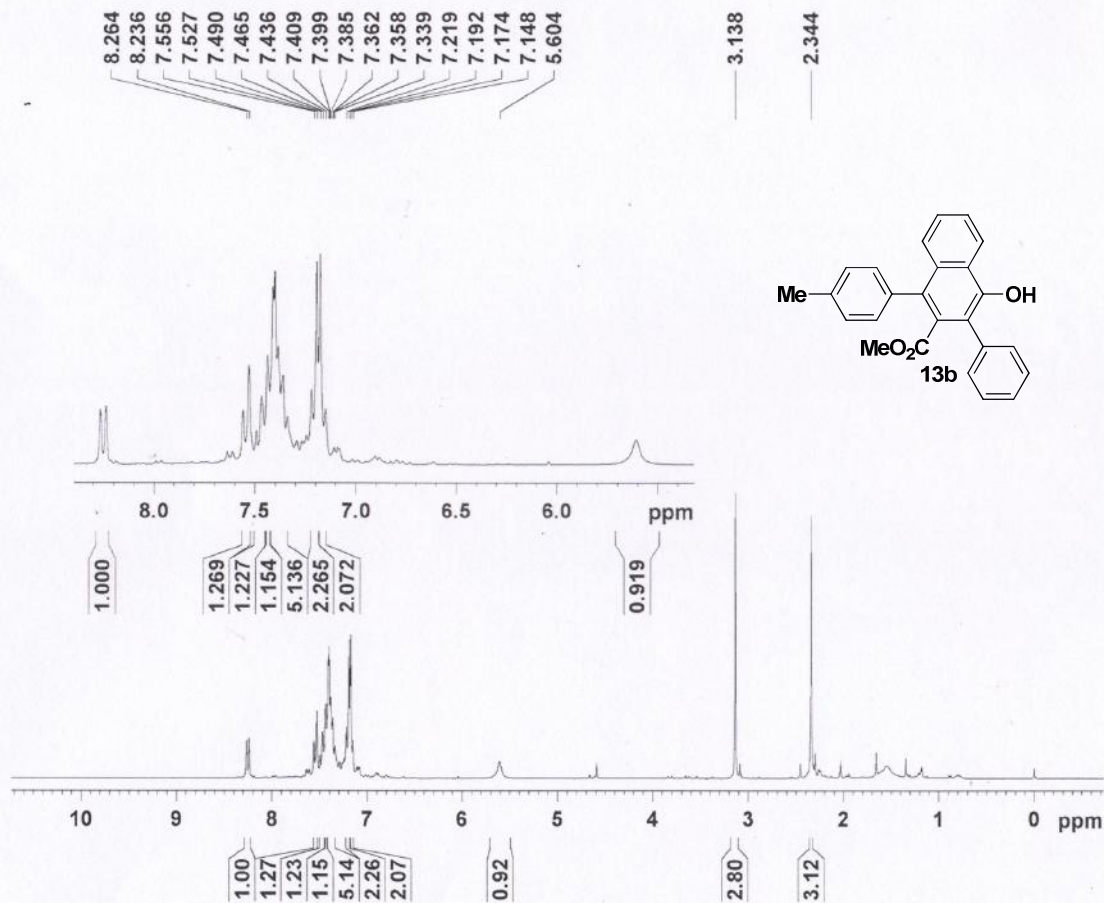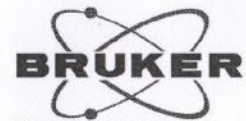

Current Data Parameters  
 NAME JK-B-183  
 EXPNO 1  
 PROCNO 1

F2 - Acquisition Parameters  
 Date\_ 20151108  
 Time 0.17  
 INSTRUM spect  
 PROBHD 5 mm DUL 13C-1  
 PULPROG zg30  
 TD 65536  
 SOLVENT CDCl<sub>3</sub>  
 NS 16  
 DS 2  
 SWH 6172.839 Hz  
 FIDRES 0.094190 Hz  
 AQ 5.3084660 sec  
 RG 114  
 DW 81.000 usec  
 DE 6.00 usec  
 TE 300.0 K  
 D1 1.00000000 sec  
 TD0 1

===== CHANNEL f1 =====  
 NUC1 1H  
 P1 13.88 usec  
 PL1 0.00 dB  
 SFO1 300.1318534 MHz

F2 - Processing parameters  
 SI 32768  
 SF 300.1300323 MHz  
 WDW EM  
 SSB 0  
 LB 0.30 Hz  
 GB 0  
 PC 1.00

<sup>1</sup>H-NMR Spectra of Compound 13b

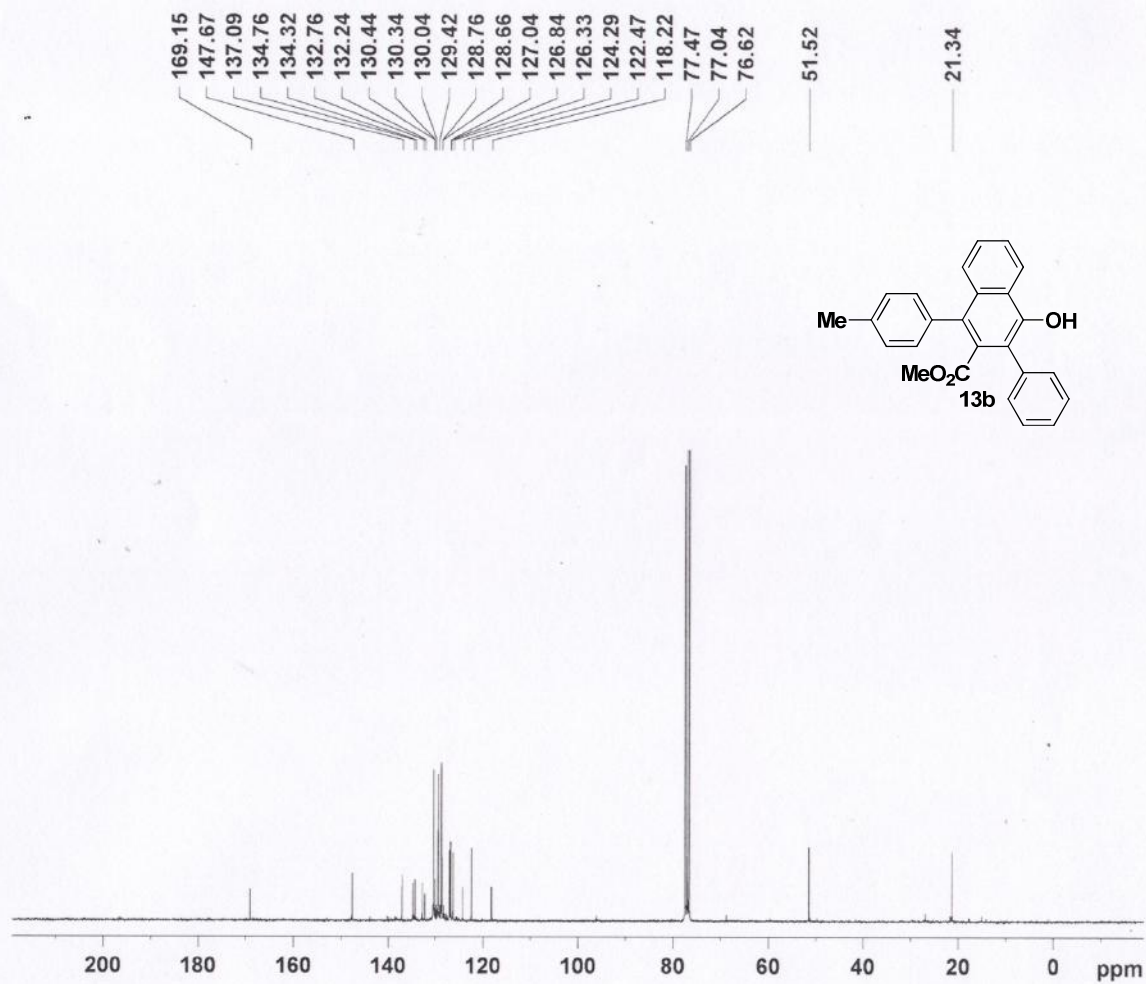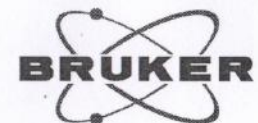

Current Data Parameters  
NAME JK-B-183  
EXPNO 3  
PROCNO 1

F2 - Acquisition Parameters  
Date 20151108  
Time 7.53  
INSTRUM spect  
PROBHD 5 mm DUL 13C-1  
PULPROG zgpg30  
TD 65536  
SOLVENT CDC13  
NS 6000  
DS 4  
SWH 17985.611 Hz  
FIDRES 0.274439 Hz  
AQ 1.8219508 sec  
RG 812.7  
DW 27.800 usec  
DE 6.00 usec  
TE 300.0 K  
D1 2.00000000 sec  
d11 0.03000000 sec  
DELTA 1.89999998 sec  
TD0 1

===== CHANNEL f1 =====  
NUC1 13C  
P1 10.38 usec  
PL1 0.00 dB  
SFO1 75.4752953 MHz

===== CHANNEL f2 =====  
CPDPRG2 waltz16  
NUC2 1H  
PCPD2 80.00 usec  
PL2 0.00 dB  
PL12 15.21 dB  
PL13 16.00 dB  
SFO2 300.1312005 MHz

F2 - Processing parameters  
SI 32768  
SF 75.4677490 MHz  
WDW EM  
SSB 0  
LB 1.00 Hz  
GB 0  
PC 1.40

<sup>13</sup>C-NMR Spectra of Compound 13b

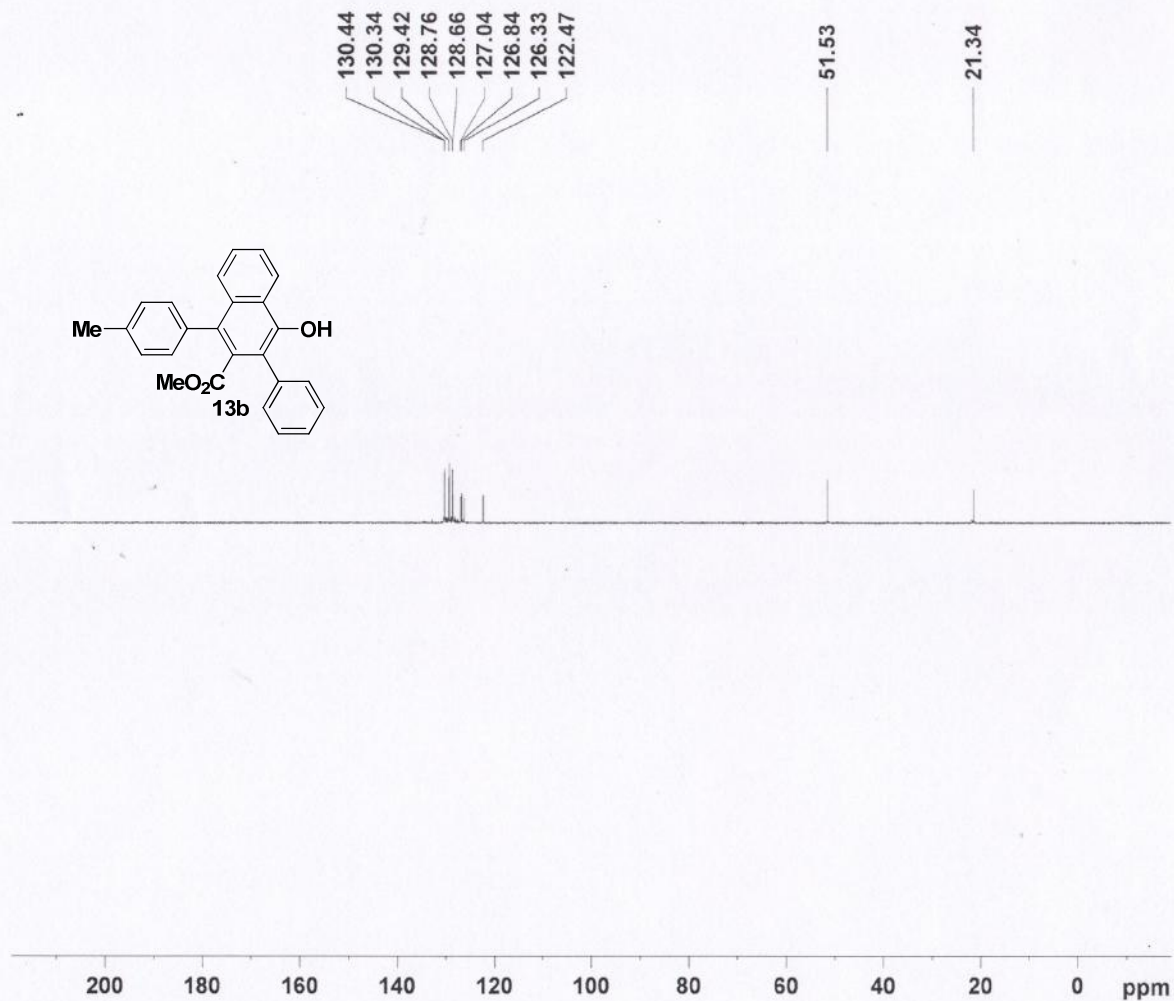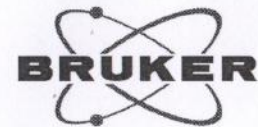

Current Data Parameters  
 NAME JK-B-183  
 EXPNO 2  
 PROCNO 1

F2 - Acquisition Parameters  
 Date 20151108  
 Time 0.33  
 INSTRUM spect  
 PROBHD 5 mm DUL 13C-1  
 PULPROG dept135  
 TD 65536  
 SOLVENT CDCl3  
 NS 1000  
 DS 4  
 SWH 17985.611 Hz  
 FIDRES 0.274439 Hz  
 AQ 1.8219508 sec  
 RG 16384  
 DW 27.800 usec  
 DE 6.00 usec  
 TE 300.0 K  
 CNST2 145.0000000  
 D1 2.0000000 sec  
 d2 0.00344828 sec  
 d12 0.00002000 sec  
 DELTA 0.00001322 sec  
 TD0 1

===== CHANNEL f1 =====  
 NUC1 13C  
 P1 10.38 usec  
 p2 20.76 usec  
 PL1 0.00 dB  
 SFO1 75.4752953 MHz

===== CHANNEL f2 =====  
 CPDPRG2 waltz16  
 NUC2 1H  
 P3 13.88 usec  
 p4 27.76 usec  
 PCPD2 80.00 usec  
 PL2 0.00 dB  
 PL12 15.21 dB  
 SFO2 300.1312005 MHz

F2 - Processing parameters  
 SI 32768  
 SF 75.4677490 MHz  
 WDW EM  
 SSB 0  
 LB 1.00 Hz  
 GB 0  
 PC 1.40

DEPT-135 NMR Spectra of Compound 13b

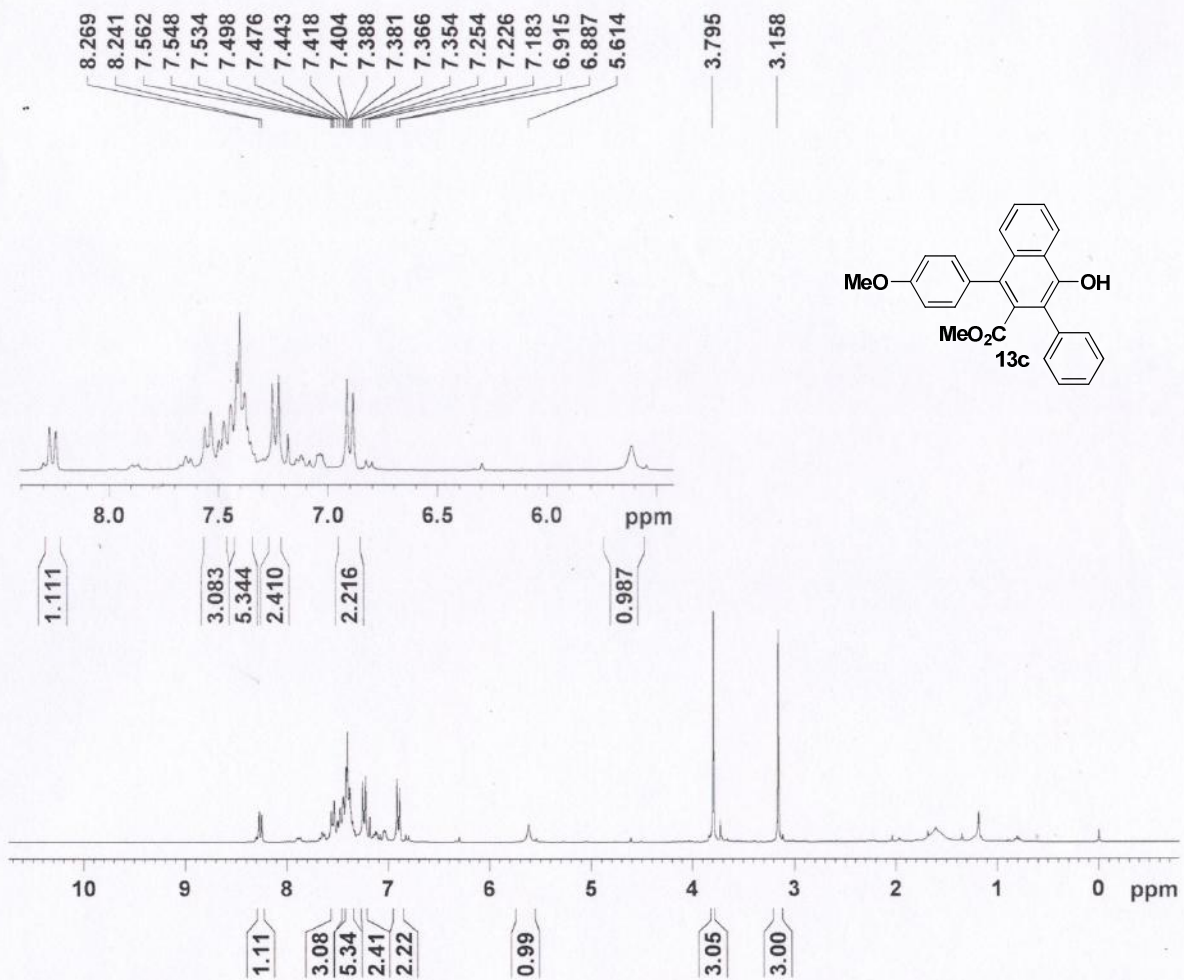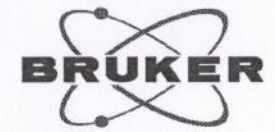

Current Data Parameters  
 NAME JK-B-188  
 EXPNO 1  
 PROCNO 1

F2 - Acquisition Parameters  
 Date\_ 20151114  
 Time 2.33  
 INSTRUM spect  
 PROBHD 5 mm DUL 13C-1  
 PULPROG zg30  
 TD 65536  
 SOLVENT CDCl3  
 NS 16  
 DS 2  
 SWH 6172.839 Hz  
 FIDRES 0.094190 Hz  
 AQ 5.3084660 sec  
 RG 161.3  
 DW 81.000 usec  
 DE 6.00 usec  
 TE 300.0 K  
 D1 1.00000000 sec  
 TD0 1

===== CHANNEL f1 =====  
 NUC1 1H  
 P1 13.88 usec  
 PL1 0.00 dB  
 SFO1 300.1318534 MHz

F2 - Processing parameters  
 SI 32768  
 SF 300.1300293 MHz  
 WDW EM  
 SSB 0  
 LB 0.30 Hz  
 GB 0  
 PC 1.00

<sup>1</sup>H-NMR Spectra of Compound 13c



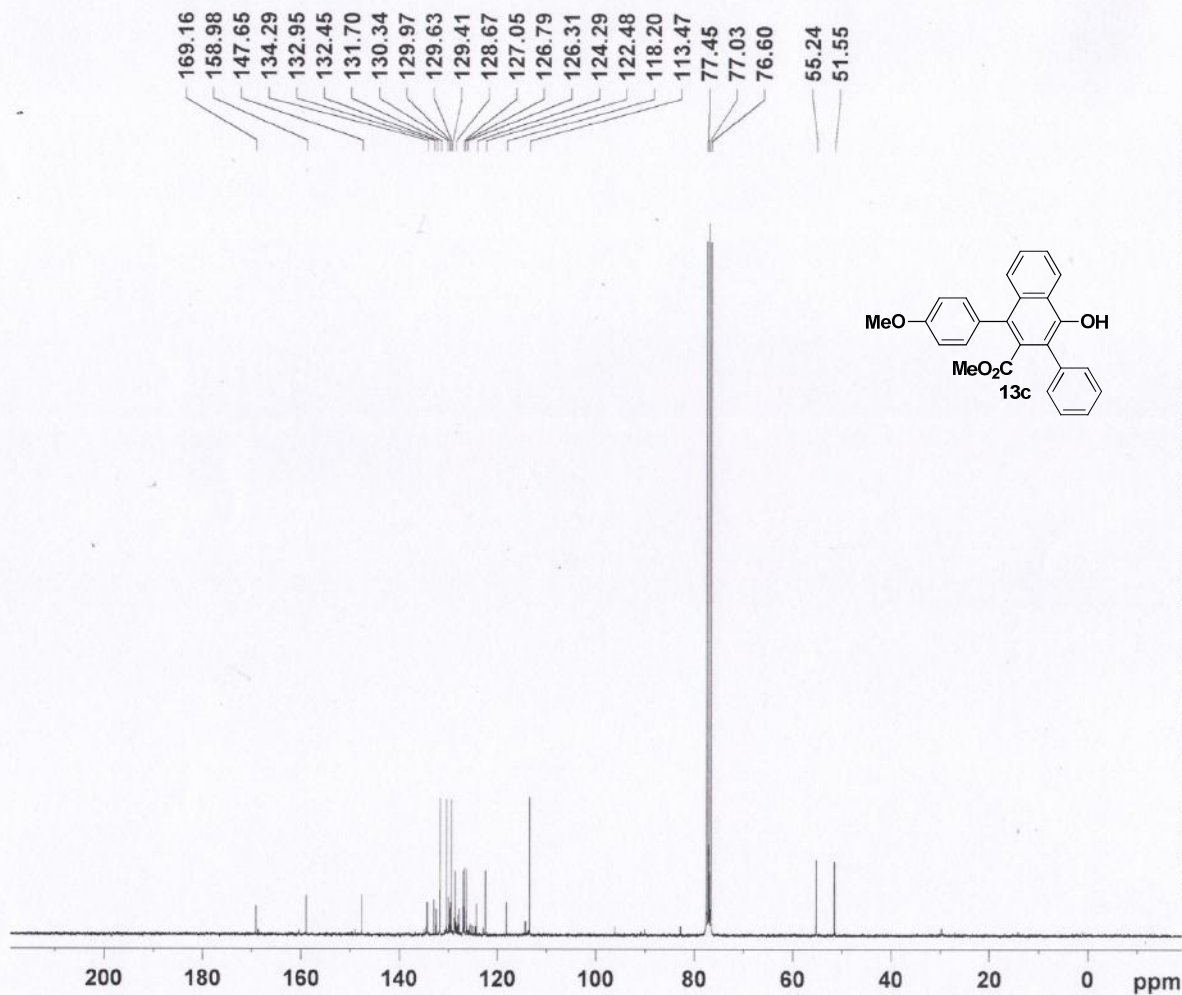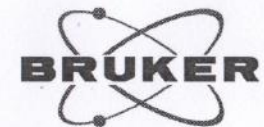

Current Data Parameters  
NAME JK-B-188  
EXPNO 3  
PROCNO 1

F2 - Acquisition Parameters  
Date 20151114  
Time 8.32  
INSTRUM spect  
PROBHD 5 mm DUL 13C-1  
PULPROG zgpg30  
TD 65536  
SOLVENT CDCl3  
NS 5000  
DS 4  
SWH 17985.811 Hz  
FIDRES 0.274439 Hz  
AQ 1.8219508 sec  
RG 574.7  
DW 27.800 usec  
DE 6.00 usec  
TE 300.0 K  
D1 2.00000000 sec  
d11 0.03000000 sec  
DELTA 1.89999998 sec  
TD0 1

===== CHANNEL f1 =====  
NUC1 13C  
P1 10.38 usec  
PL1 0.00 dB  
SFO1 75.4752953 MHz

===== CHANNEL f2 =====  
CPDPRG2 waltz16  
NUC2 1H  
PCPD2 80.00 usec  
PL2 0.00 dB  
PL12 15.21 dB  
PL13 16.00 dB  
SFO2 300.1312005 MHz

F2 - Processing parameters  
SI 32768  
SF 75.4677490 MHz  
WDW EM  
SSB 0  
LB 1.00 Hz  
GB 0  
PC 1.40

<sup>13</sup>C-NMR Spectra of Compound 13c

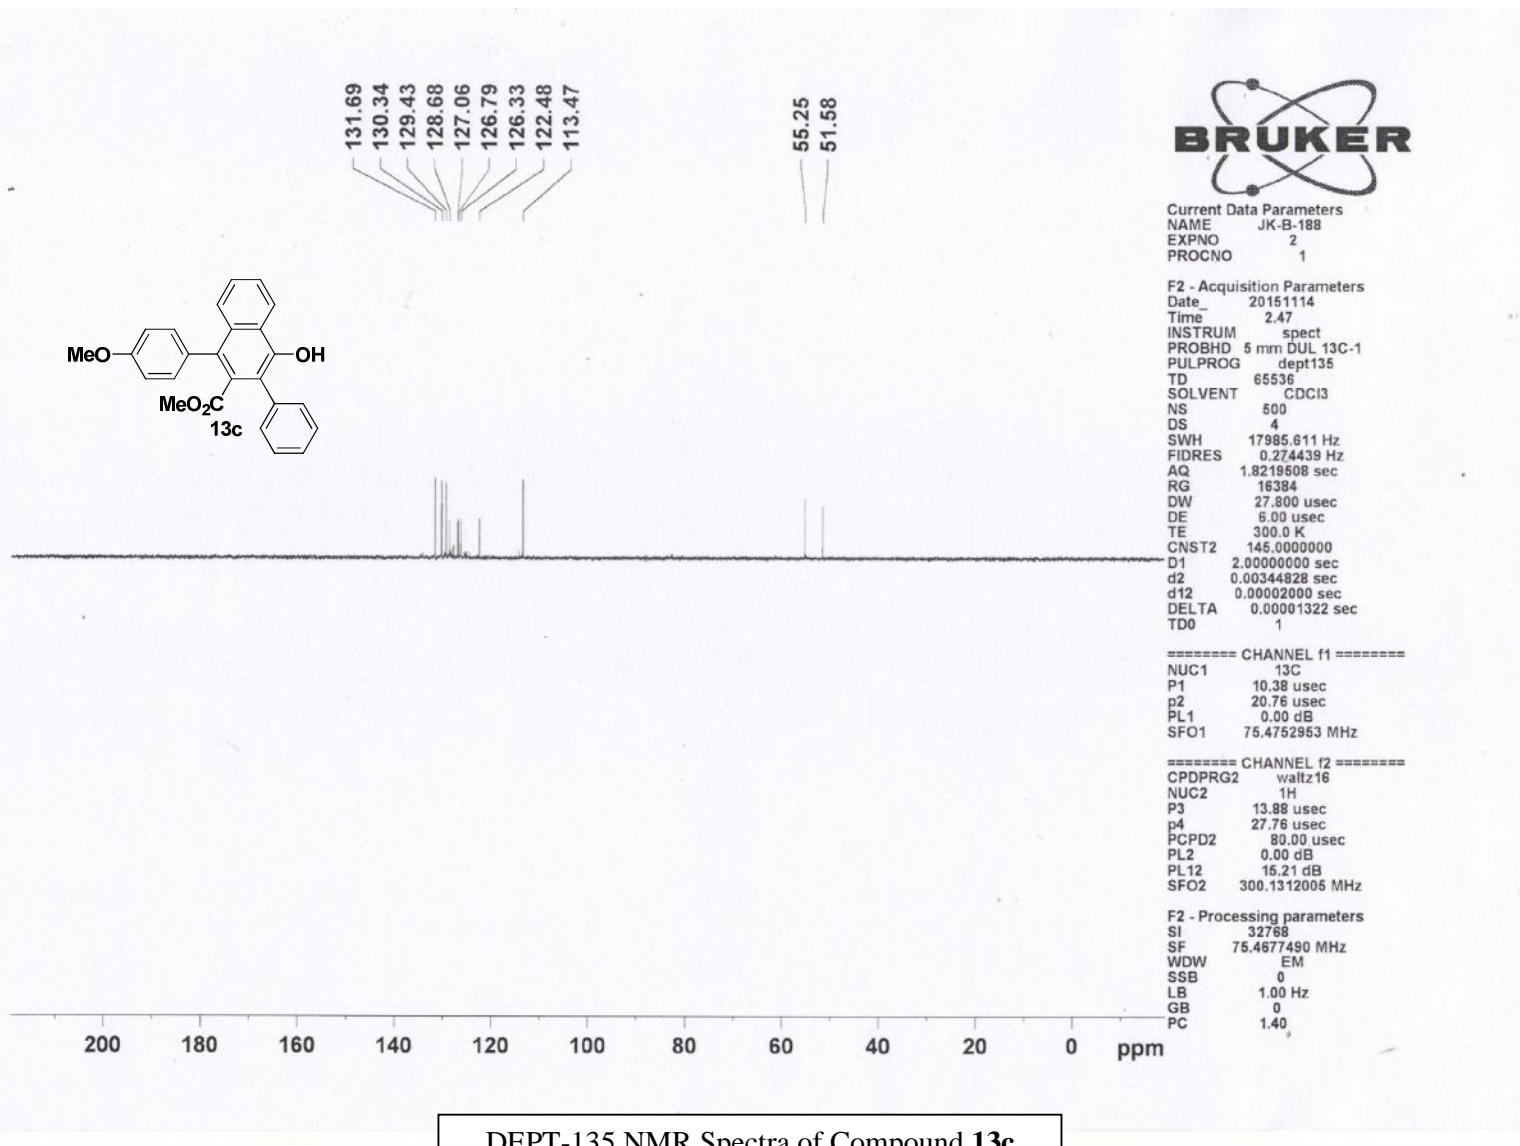

DEPT-135 NMR Spectra of Compound **13c**

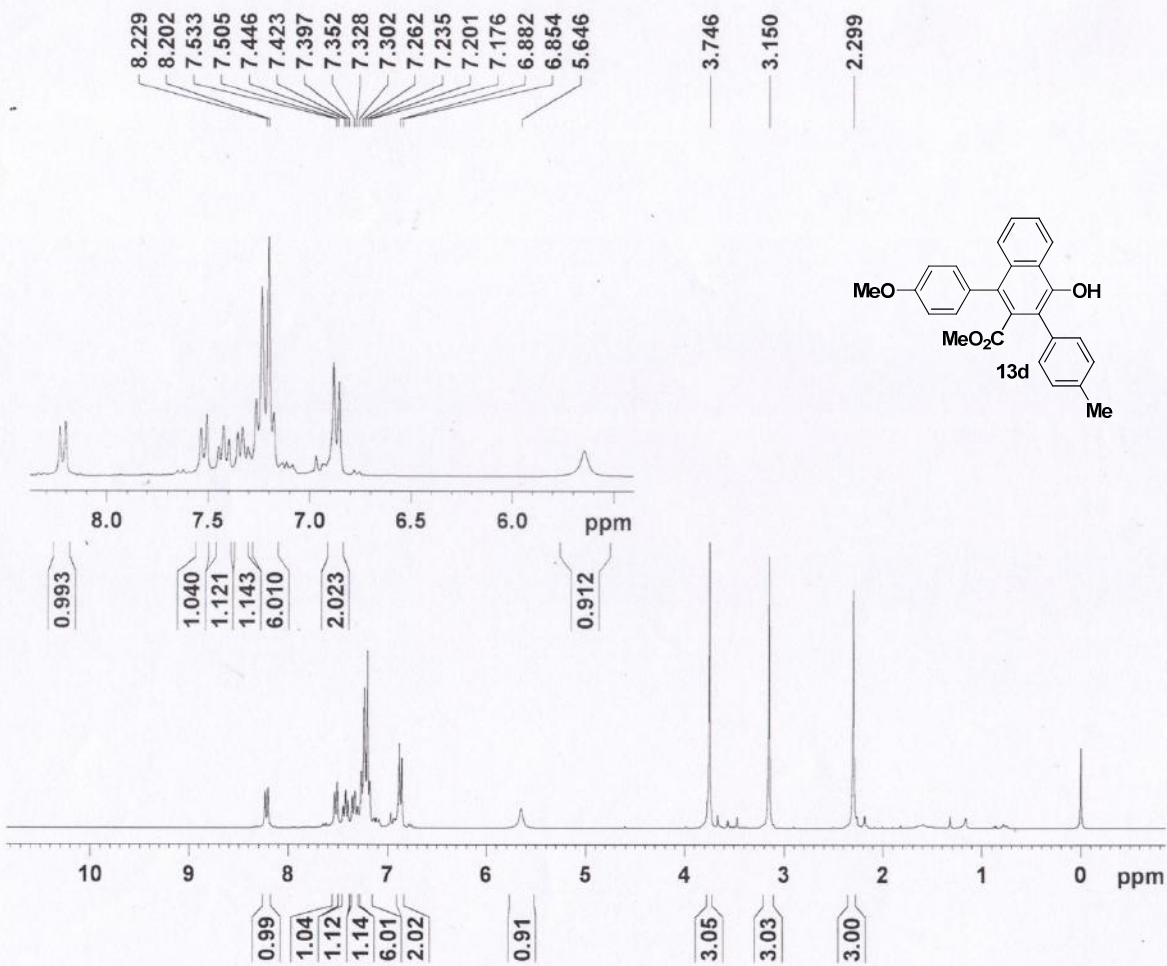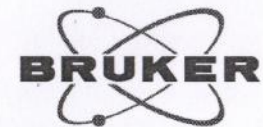

Current Data Parameters  
 NAME JK-B-189  
 EXPNO 1  
 PROCNO 1

F2 - Acquisition Parameters  
 Date\_ 20151114  
 Time 1.12  
 INSTRUM spect  
 PROBHD 5 mm DUL 13C-1  
 PULPROG zg30  
 TD 65536  
 SOLVENT CDCl3  
 NS 16  
 DS 2  
 SWH 6172.839 Hz  
 FIDRES 0.094190 Hz  
 AQ 5.3084660 sec  
 RG 40.3  
 DW 81.000 usec  
 DE 6.00 usec  
 TE 300.0 K  
 D1 1.00000000 sec  
 TD0 1

===== CHANNEL f1 =====  
 NUC1 1H  
 P1 13.88 usec  
 PL1 0.00 dB  
 SFO1 300.1318534 MHz

F2 - Processing parameters  
 SI 32768  
 SF 300.1300445 MHz  
 WDW EM  
 SSB 0  
 LB 0.30 Hz  
 GB 0  
 PC 1.00

<sup>1</sup>H-NMR Spectra of Compound 13d

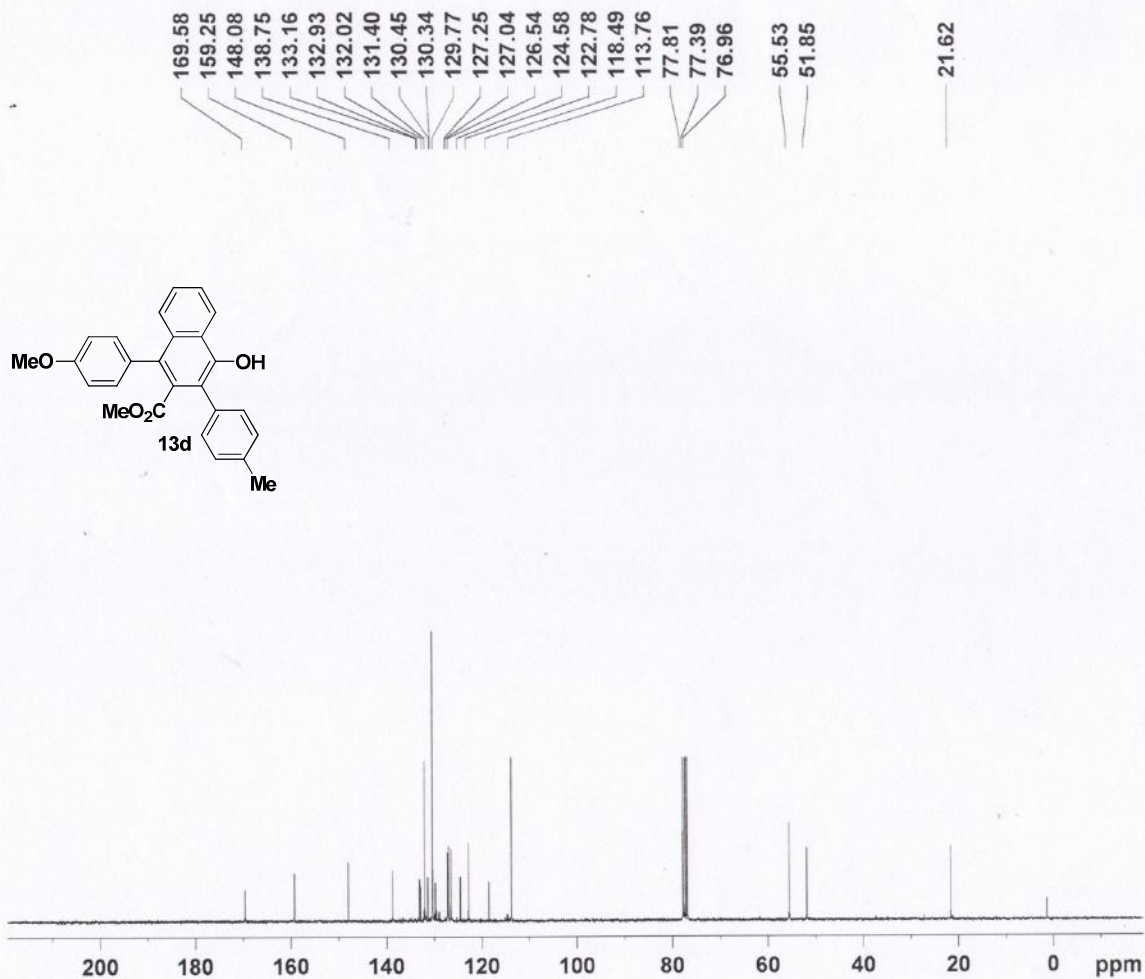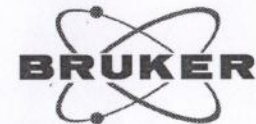

Current Data Parameters  
NAME JK-B-189  
EXPNO 3  
PROCNO 1

F2 - Acquisition Parameters  
Date\_ 20161114  
Time 1.41  
INSTRUM spect  
PROBHD 5 mm DUL 13C-1  
PULPROG zgpg30  
TD 65536  
SOLVENT CDCl3  
NS 300  
DS 4  
SWH 17986.611 Hz  
FIDRES 0.274439 Hz  
AQ 1.8219508 sec  
RG 645.1  
DW 27.800 usec  
DE 6.00 usec  
TE 300.0 K  
D1 2.0000000 sec  
d11 0.0300000 sec  
DELTA 1.89999998 sec  
TD0 1

===== CHANNEL f1 =====  
NUC1 13C  
P1 10.38 usec  
PL1 0.00 dB  
SFO1 75.4762953 MHz

===== CHANNEL f2 =====  
CPDPRG2 waltz16  
NUC2 1H  
PCPD2 80.00 usec  
PL2 0.00 dB  
PL12 15.21 dB  
PL13 16.00 dB  
SFO2 300.1312005 MHz

F2 - Processing parameters  
SI 32768  
SF 75.4677281 MHz  
WDW EM  
SSB 0  
LB 1.00 Hz  
GB 0  
PC 1.40

<sup>13</sup>C-NMR Spectra of Compound 13d



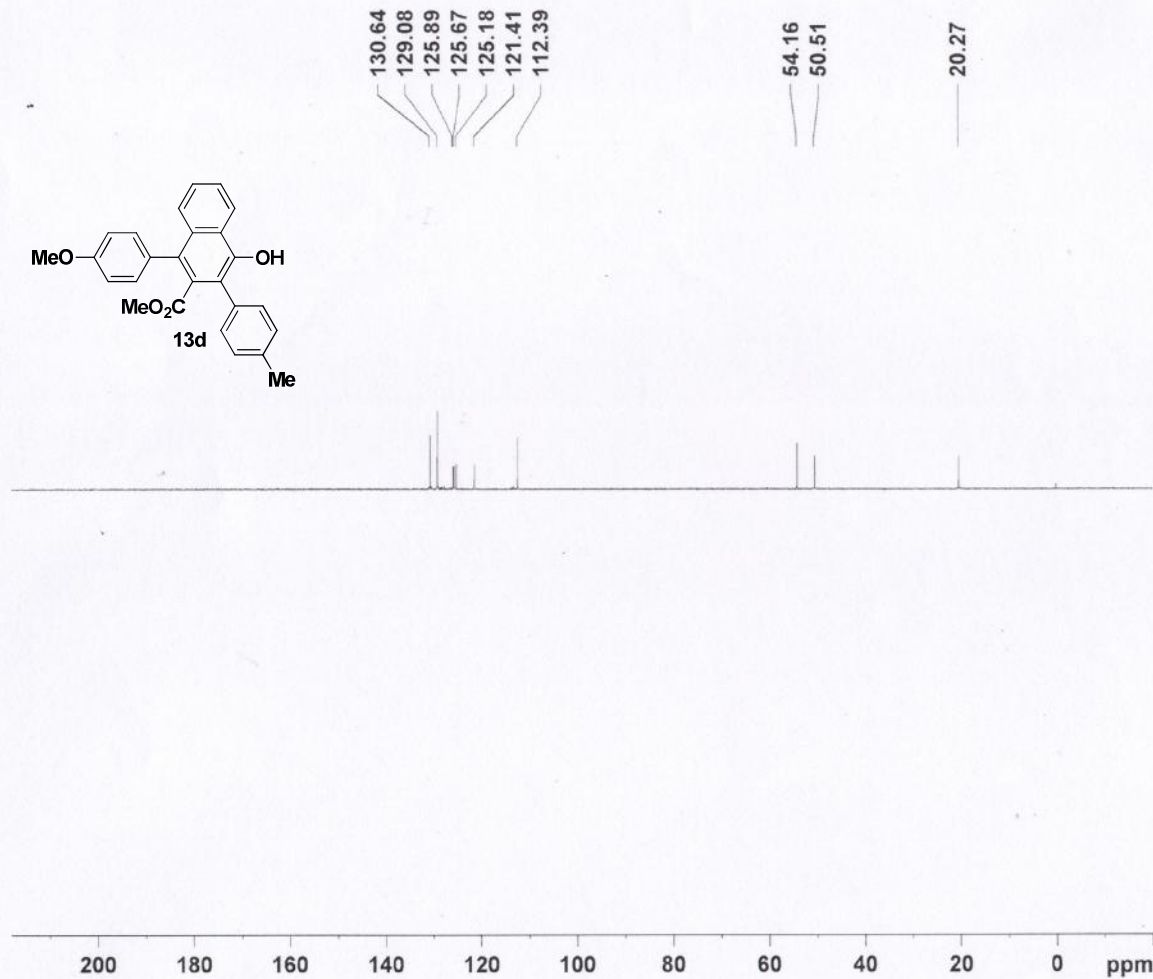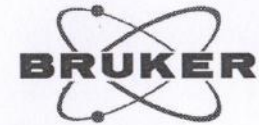

Current Data Parameters  
 NAME JK-B-189  
 EXPNO 2  
 PROCNO 1

F2 - Acquisition Parameters  
 Date\_ 20151114  
 Time\_ 1.21  
 INSTRUM spect  
 PROBHD 5 mm DUL 13C-1  
 PULPROG dept135  
 TD 65536  
 SOLVENT CDCl3  
 NS 100  
 DS 4  
 SWH 17985.611 Hz  
 FIDRES 0.274439 Hz  
 AQ 1.8219508 sec  
 RG 16384  
 DW 27.800 usec  
 DE 6.00 usec  
 TE 300.0 K  
 CNST2 145.0000000  
 D1 2.00000000 sec  
 d2 0.00344828 sec  
 d12 0.00002000 sec  
 DELTA 0.00001322 sec  
 TD0 1

===== CHANNEL f1 =====  
 NUC1 13C  
 P1 10.38 usec  
 p2 20.76 usec  
 PL1 0.00 dB  
 SFO1 75.4752953 MHz

===== CHANNEL f2 =====  
 CPDPRG2 waltz16  
 NUC2 1H  
 P3 13.88 usec  
 p4 27.76 usec  
 PCPD2 80.00 usec  
 PL2 0.00 dB  
 PL12 15.21 dB  
 SFO2 300.1312005 MHz

F2 - Processing parameters  
 SI 32768  
 SF 75.4678318 MHz  
 WDW EM  
 SSB 0  
 LB 1.00 Hz  
 GB 0  
 PC 1.40

DEPT-135 NMR Spectra of Compound **13d**

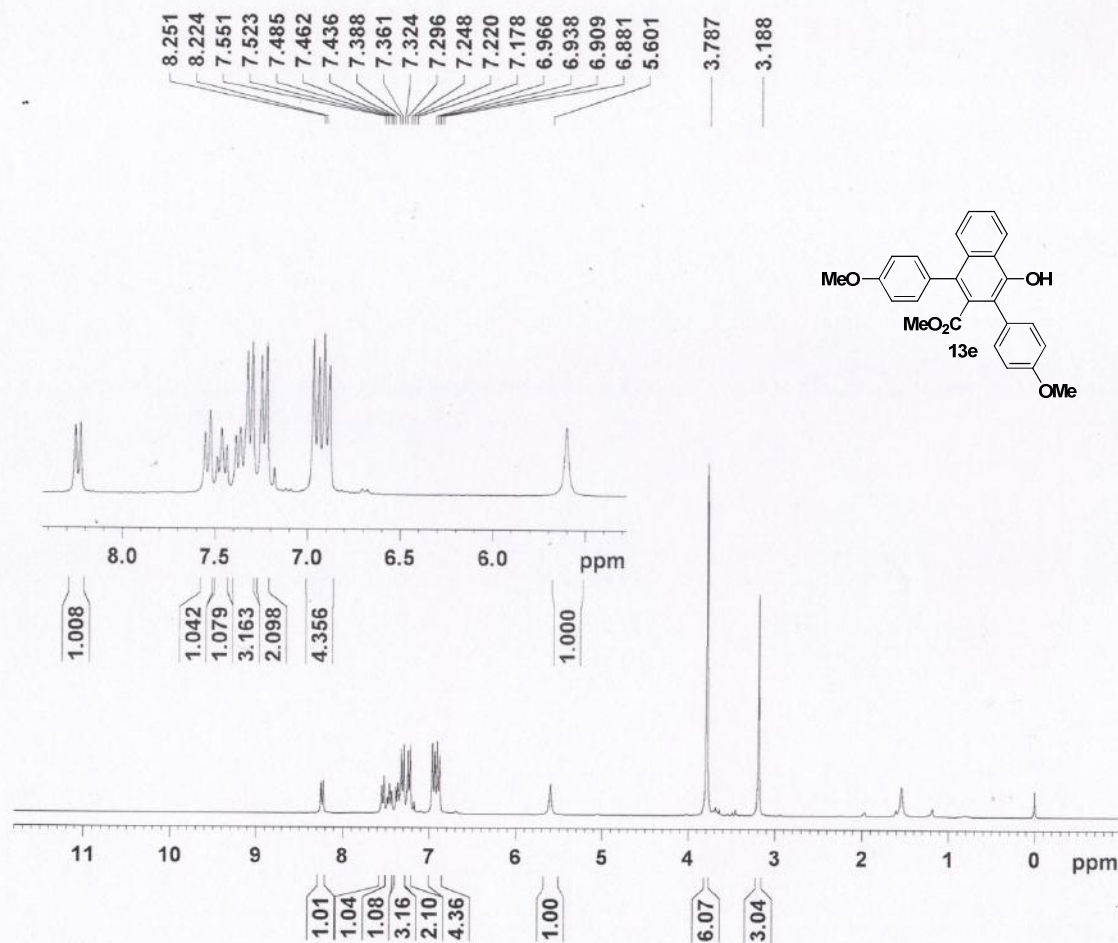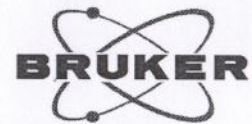

Current Data Parameters

NAME JK-B-187  
EXPNO 1  
PROCNO 1

F2 - Acquisition Parameters

Date 20151113  
Time 20.38  
INSTRUM spect  
PROBHD 5 mm DUL 13C-1  
PULPROG zg30  
TD 65536  
SOLVENT CDCl3  
NS 16  
DS 2  
SWH 6172.839 Hz  
FIDRES 0.084190 Hz  
AQ 5.3084680 sec  
RG 128  
DW 81.000 usec  
DE 6.00 usec  
TE 300.0 K  
D1 1.0000000 sec  
TD0 1

==== CHANNEL f1 =====

NUC1 1H  
P1 13.88 usec  
PL1 0.00 dB  
SFO1 300.1318534 MHz

F2 - Processing parameters

SI 32768  
SF 300.1300307 MHz  
WDW EM  
SSB 0  
LB 0.30 Hz  
GB 0  
PC 1.00

<sup>1</sup>H-NMR Spectra of Compound 13e

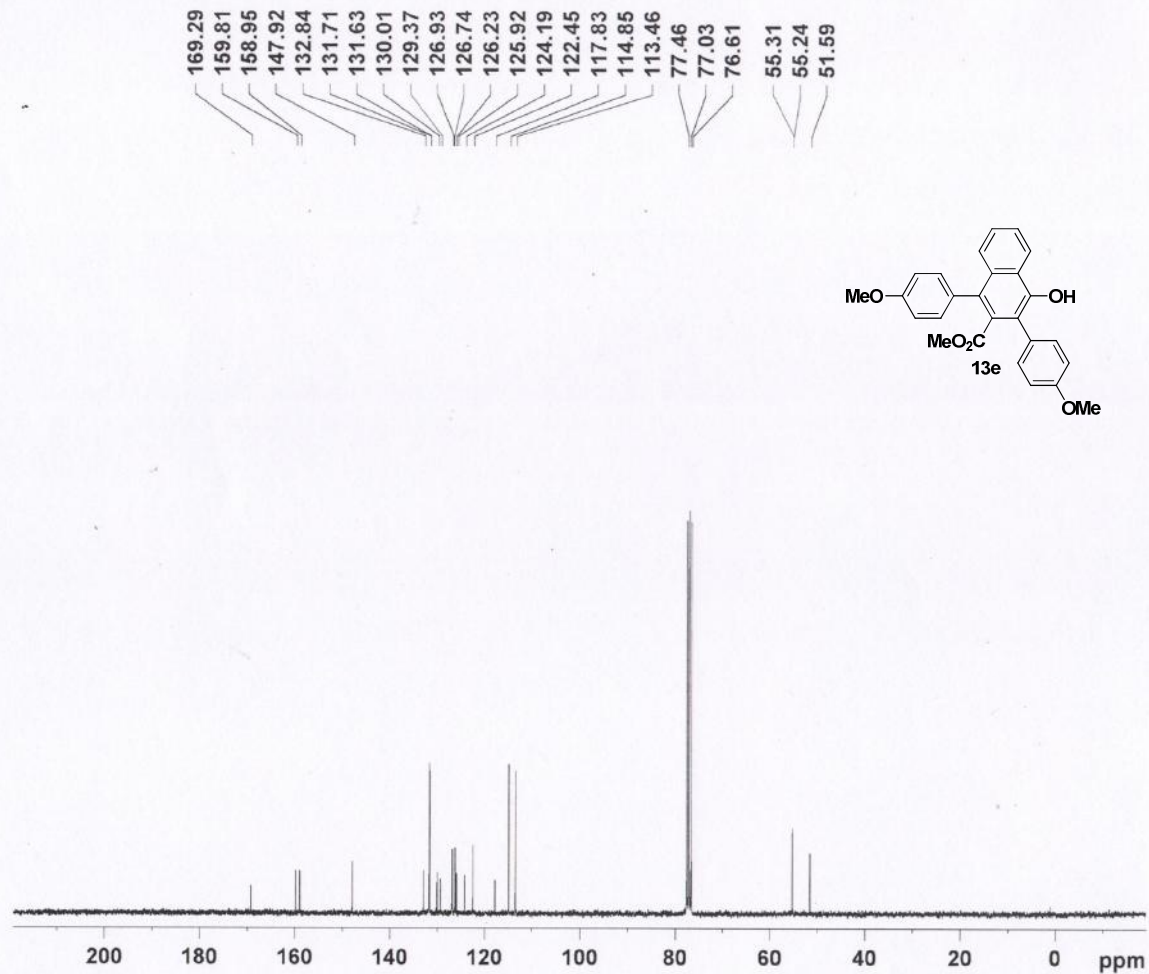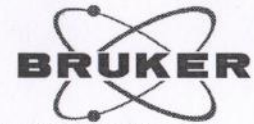

Current Data Parameters  
 NAME JK-B-187  
 EXPNO 3  
 PROCNO 1

F2 - Acquisition Parameters  
 Date 20151113  
 Time 21.28  
 INSTRUM spect  
 PROBHD 5 mm DUL 13C-1  
 PULPROG zgpg30  
 TD 65536  
 SOLVENT CDCl3  
 NS 600  
 DS 4  
 SWH 17985.611 Hz  
 FIDRES 0.274439 Hz  
 AQ 1.8219508 sec  
 RG 456.1  
 DW 27.800 usec  
 DE 6.00 usec  
 TE 300.0 K  
 D1 2.0000000 sec  
 d11 0.0300000 sec  
 DELTA 1.8599999 sec  
 TD0 1

===== CHANNEL f1 =====  
 NUC1 13C  
 P1 10.38 usec  
 PL1 0.00 dB  
 SFO1 75.4752953 MHz

===== CHANNEL f2 =====  
 CPDPRG2 waltz16  
 NUC2 1H  
 PCPD2 80.00 usec  
 PL2 0.00 dB  
 PL12 15.21 dB  
 PL13 16.00 dB  
 SFO2 300.1312005 MHz

F2 - Processing parameters  
 SI 32768  
 SF 75.4677490 MHz  
 WDW EM  
 SSB 0  
 LB 1.00 Hz  
 GB 0  
 PC 1.40

<sup>13</sup>C-NMR Spectra of Compound **13e**

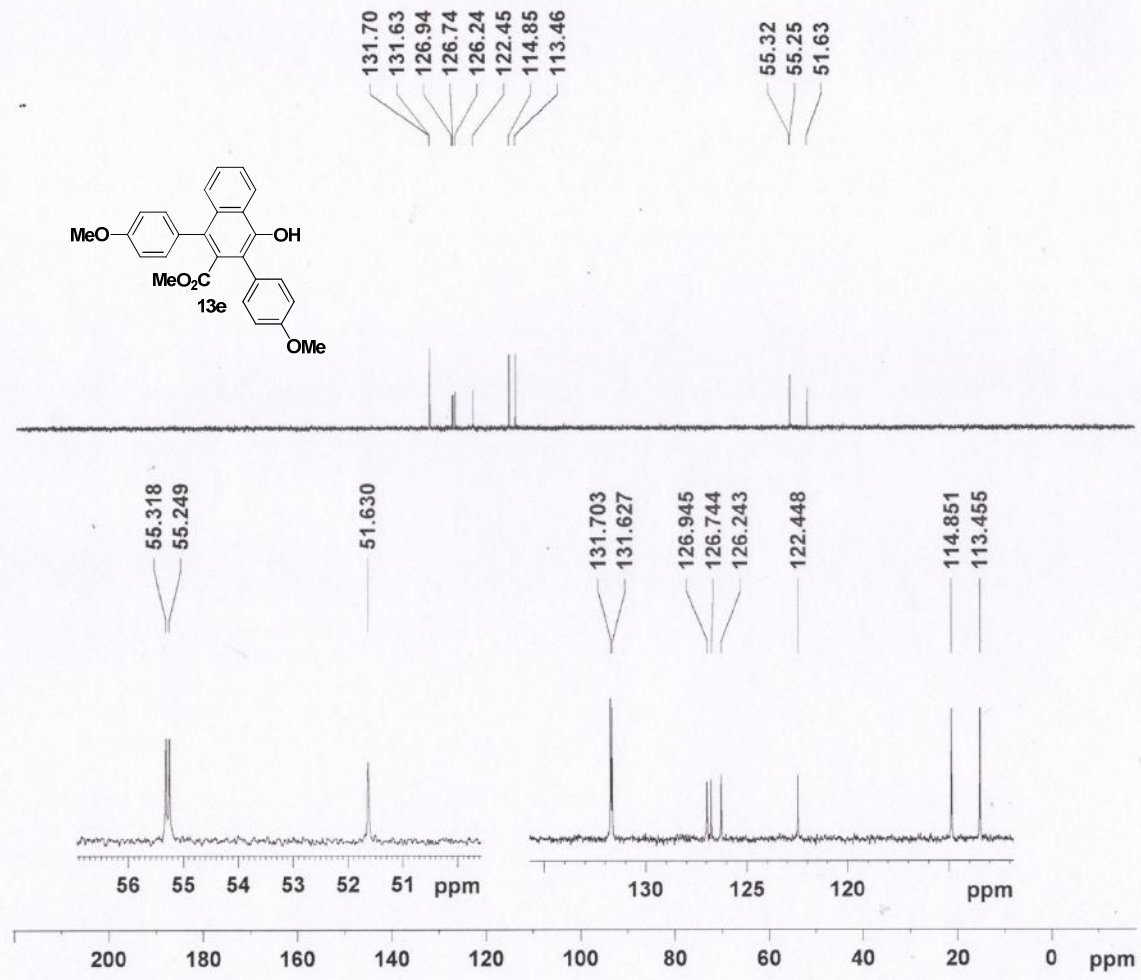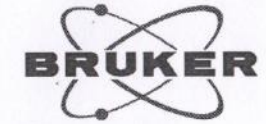

Current Data Parameters  
 NAME JK-B-187  
 EXPNO 2  
 PROCNO 1

F2 - Acquisition Parameters  
 Date\_ 20151113  
 Time 20.47  
 INSTRUM spect  
 PROBHD 5 mm DUL 13C-1  
 PULPROG dept135  
 TD 65536  
 SOLVENT CDCl3  
 NS 100  
 DS 4  
 SWH 17985.611 Hz  
 FIDRES 0.274439 Hz  
 AQ 1.8219508 sec  
 RG 16384  
 DW 27.800 usec  
 DE 6.00 usec  
 TE 300.0 K  
 CNST2 145.0000000  
 D1 2.00000000 sec  
 d2 0.00344828 sec  
 d12 0.00002000 sec  
 DELTA 0.00001322 sec  
 TD0 1

===== CHANNEL f1 =====  
 NUC1 13C  
 P1 10.38 usec  
 p2 20.76 usec  
 PL1 0.00 dB  
 SFO1 75.4752953 MHz

===== CHANNEL f2 =====  
 CPDPRG2 waltz16  
 NUC2 1H  
 P3 13.88 usec  
 p4 27.76 usec  
 PCPD2 80.00 usec  
 PL2 0.00 dB  
 PL12 15.21 dB  
 SFO2 300.1312005 MHz

F2 - Processing parameters  
 SI 32768  
 SF 75.4677490 MHz  
 WDW EM  
 SSB 0  
 LB 1.00 Hz  
 GB 0  
 PC 1.40

DEPT-135 NMR Spectra of Compound 13e



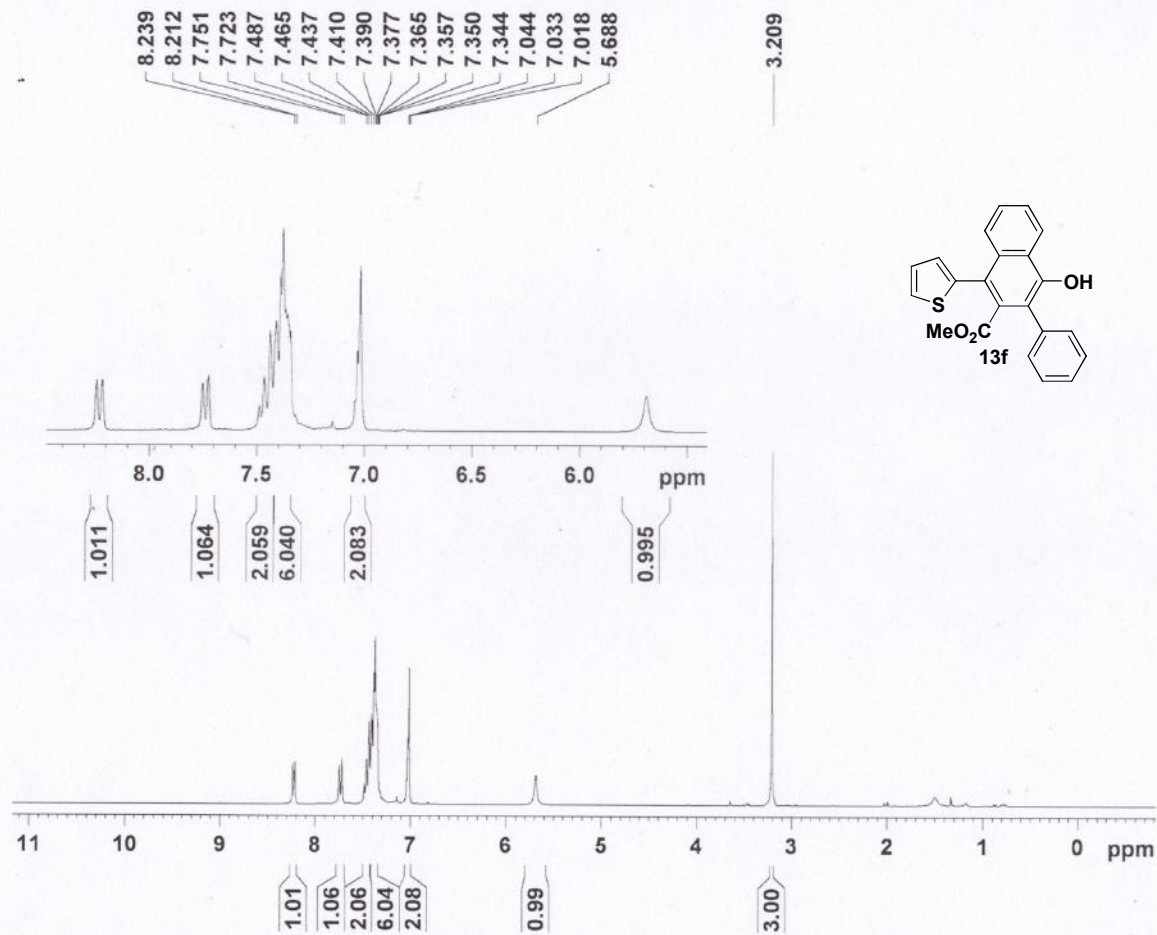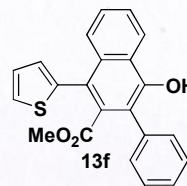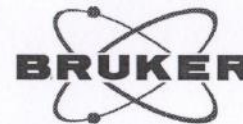

Current Data Parameters  
 NAME JK-B-185  
 EXPNO 1  
 PROCNO 1

F2 - Acquisition Parameters  
 Date 20151108  
 Time 18.56  
 INSTRUM spect  
 PROBHD 5 mm DUL 13C-1  
 PULPROG zg30  
 TD 65536  
 SOLVENT CDCl3  
 NS 16  
 DS 2  
 SWH 6172.839 Hz  
 FIDRES 0.094190 Hz  
 AQ 5.3084660 sec  
 RG 64  
 DW 81.000 usec  
 DE 6.00 usec  
 TE 300.0 K  
 D1 1.00000000 sec  
 TD0 1

===== CHANNEL f1 =====  
 NUC1 1H  
 P1 13.88 usec  
 PL1 0.00 dB  
 SFO1 300.1318534 MHz

F2 - Processing parameters  
 SI 32768  
 SF 300.1300397 MHz  
 WDW EM  
 SSB 0  
 LB 0.30 Hz  
 GB 0  
 PC 1.00

<sup>1</sup>H-NMR Spectra of Compound 13f

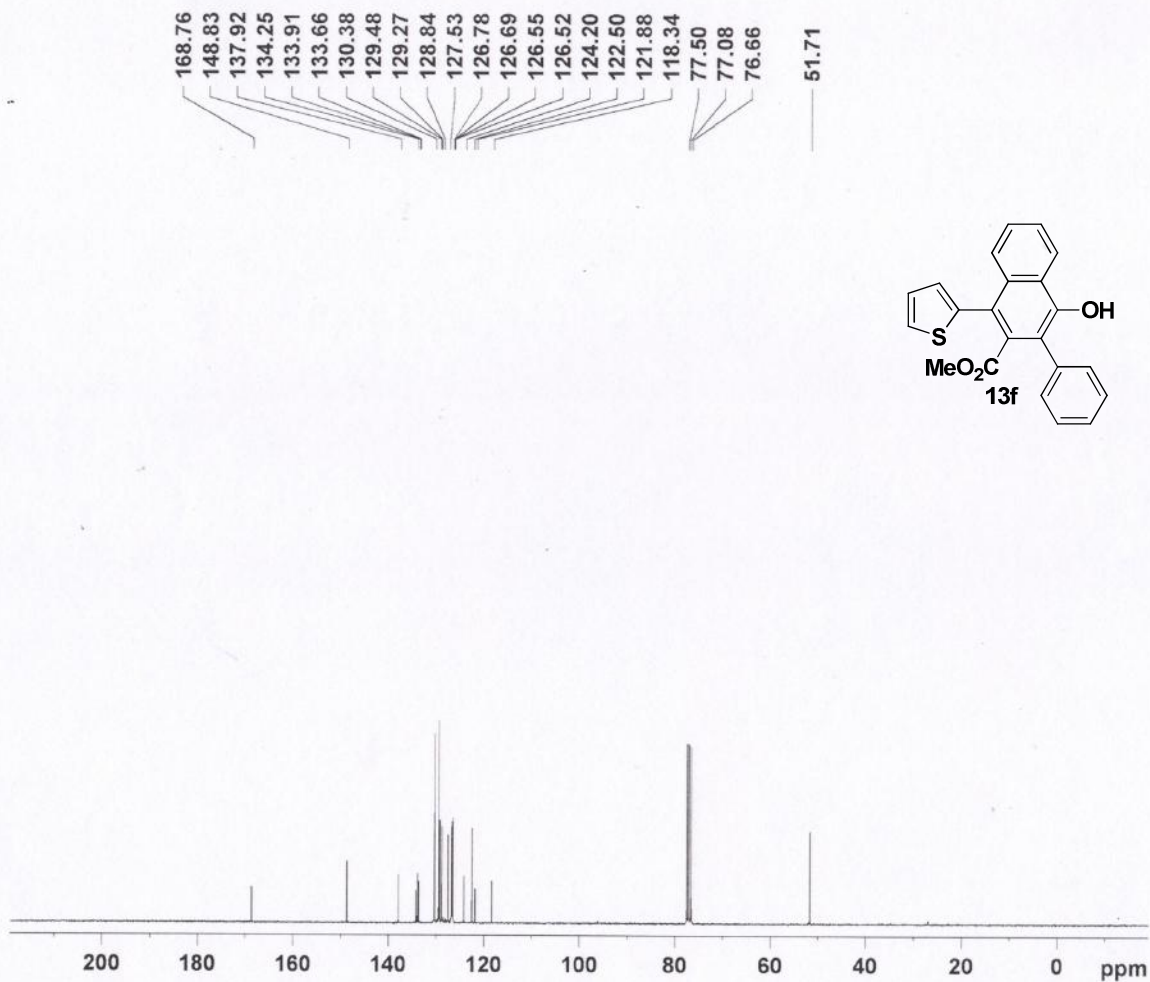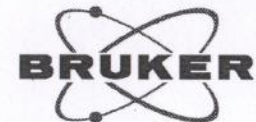

Current Data Parameters  
NAME JK-B-185  
EXPNO 3  
PROCNO 1

F2 - Acquisition Parameters  
Date\_ 20151108  
Time 20.54  
INSTRUM spect  
PROBHD 5 mm DUL 13C-1  
PULPROG zgpg30  
TD 65536  
SOLVENT CDCl3  
NS 1500  
DS 4  
SWH 17985.611 Hz  
FIDRES 0.274439 Hz  
AQ 1.8219608 sec  
RG 724.1  
DW 27.800 usec  
DE 6.00 usec  
TE 300.0 K  
D1 2.0000000 sec  
d11 0.03000000 sec  
DELTA 1.89999998 sec  
TD0 1

===== CHANNEL f1 =====  
NUC1 13C  
P1 10.38 usec  
PL1 0.00 dB  
SFO1 75.4752963 MHz

===== CHANNEL f2 =====  
CPDPRG2 waltz16  
NUC2 1H  
PCPD2 80.00 usec  
PL2 0.00 dB  
PL12 15.21 dB  
PL13 16.00 dB  
SFO2 300.1312005 MHz

F2 - Processing parameters  
SI 32768  
SF 75.4677490 MHz  
WDW EM  
SSB 0  
LB 1.00 Hz  
GB 0  
PC 1.40

<sup>13</sup>C-NMR Spectra of Compound **13f**

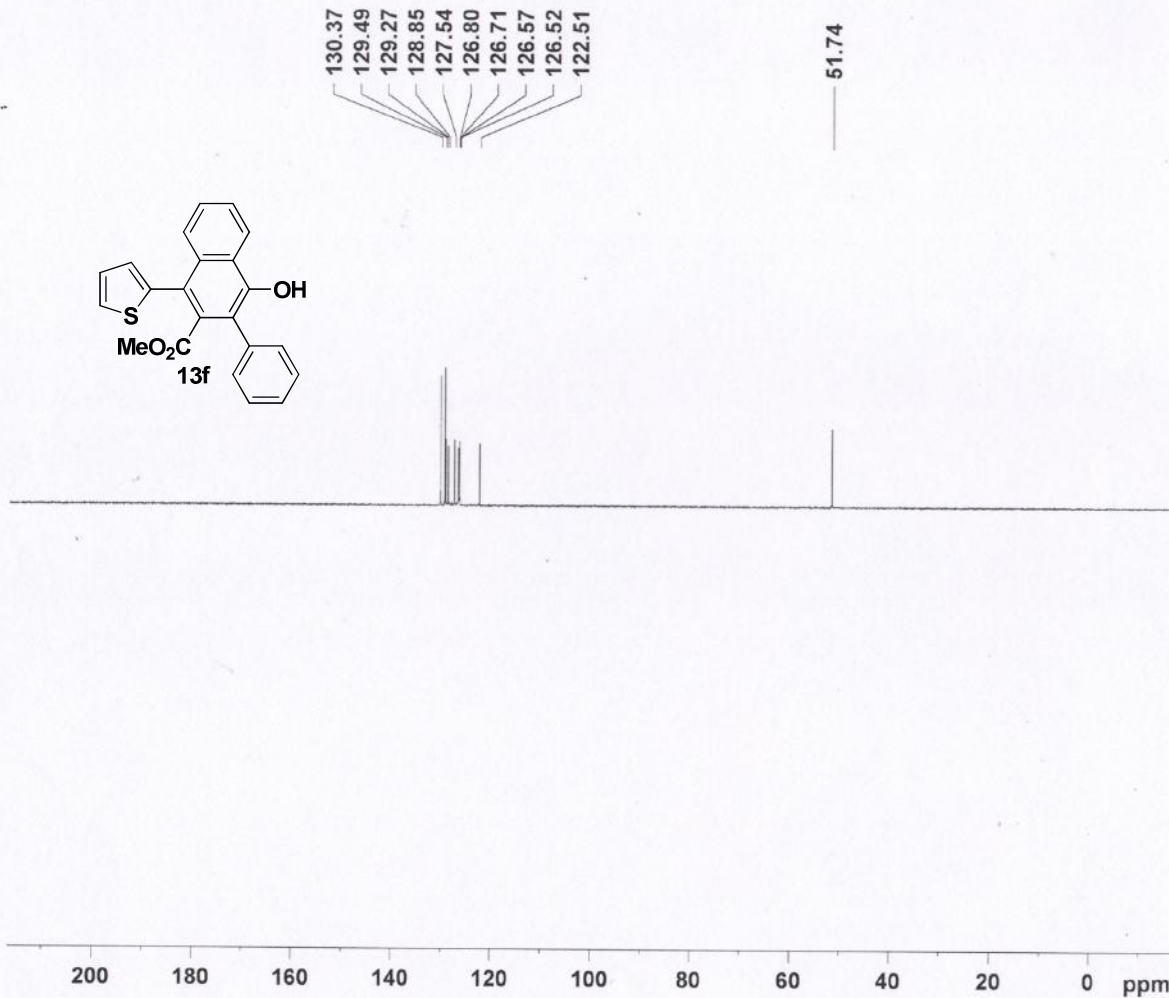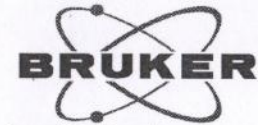

Current Data Parameters  
 NAME JK-B-185  
 EXPNO 2  
 PROCNO 1

F2 - Acquisition Parameters  
 Date\_ 20151108  
 Time 19.11  
 INSTRUM spect  
 PROBHD 5 mm DUL 13C-1  
 PULPROG dept135  
 TD 65536  
 SOLVENT CDCl3  
 NS 256  
 DS 4  
 SWH 17985.611 Hz  
 FIDRES 0.274439 Hz  
 AQ 1.8219508 sec  
 RG 16384  
 DW 27.800 usec  
 DE 6.00 usec  
 TE 300.0 K  
 CNST2 145.0000000  
 D1 2.00000000 sec  
 d2 0.00344828 sec  
 d12 0.00002000 sec  
 DELTA 0.00001322 sec  
 TDO 1

===== CHANNEL f1 =====  
 NUC1 13C  
 P1 10.38 usec  
 p2 20.76 usec  
 PL1 0.00 dB  
 SFO1 75.4752953 MHz

===== CHANNEL f2 =====  
 CPDPRG2 waltz16  
 NUC2 1H  
 P3 13.88 usec  
 p4 27.76 usec  
 PCPD2 80.00 usec  
 PL2 0.00 dB  
 PL12 15.21 dB  
 SFO2 300.1312005 MHz

F2 - Processing parameters  
 SI 32768  
 SF 75.4677490 MHz  
 WDW EM  
 SSB 0  
 LB 1.00 Hz  
 GB 0  
 PC 1.40

DEPT-135 NMR Spectra of Compound **13f**

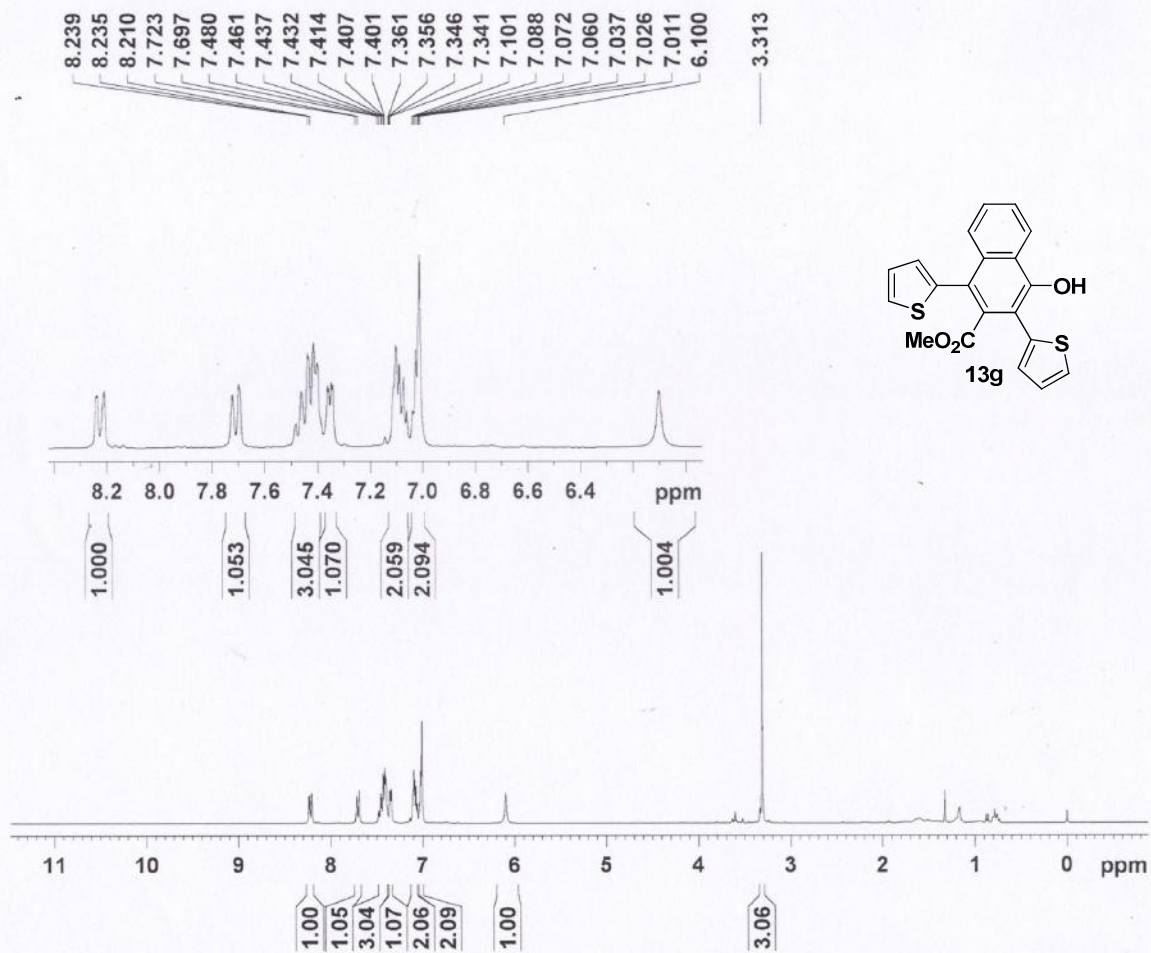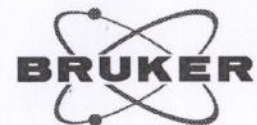

Current Data Parameters  
 NAME JK-B-186  
 EXPNO 1  
 PROCNO 1

F2 - Acquisition Parameters  
 Date\_ 20151113  
 Time 2.48  
 INSTRUM spect  
 PROBHD 5 mm DUL 13C-1  
 PULPROG zg30  
 TD 65536  
 SOLVENT CDCl3  
 NS 16  
 DS 2  
 SWH 6172.839 Hz  
 FIDRES 0.094190 Hz  
 AQ 5.3084660 sec  
 RG 50.8  
 DW 81.000 usec  
 DE 6.00 usec  
 TE 300.0 K  
 D1 1.0000000 sec  
 TD0 1

===== CHANNEL f1 =====  
 NUC1 1H  
 P1 13.88 usec  
 PL1 0.00 dB  
 SFO1 300.1318534 MHz

F2 - Processing parameters  
 SI 32768  
 SF 300.1300415 MHz  
 WDW EM  
 SSB 0  
 LB 0.30 Hz  
 GB 0  
 PC 1.00

<sup>1</sup>H-NMR Spectra of Compound 13g



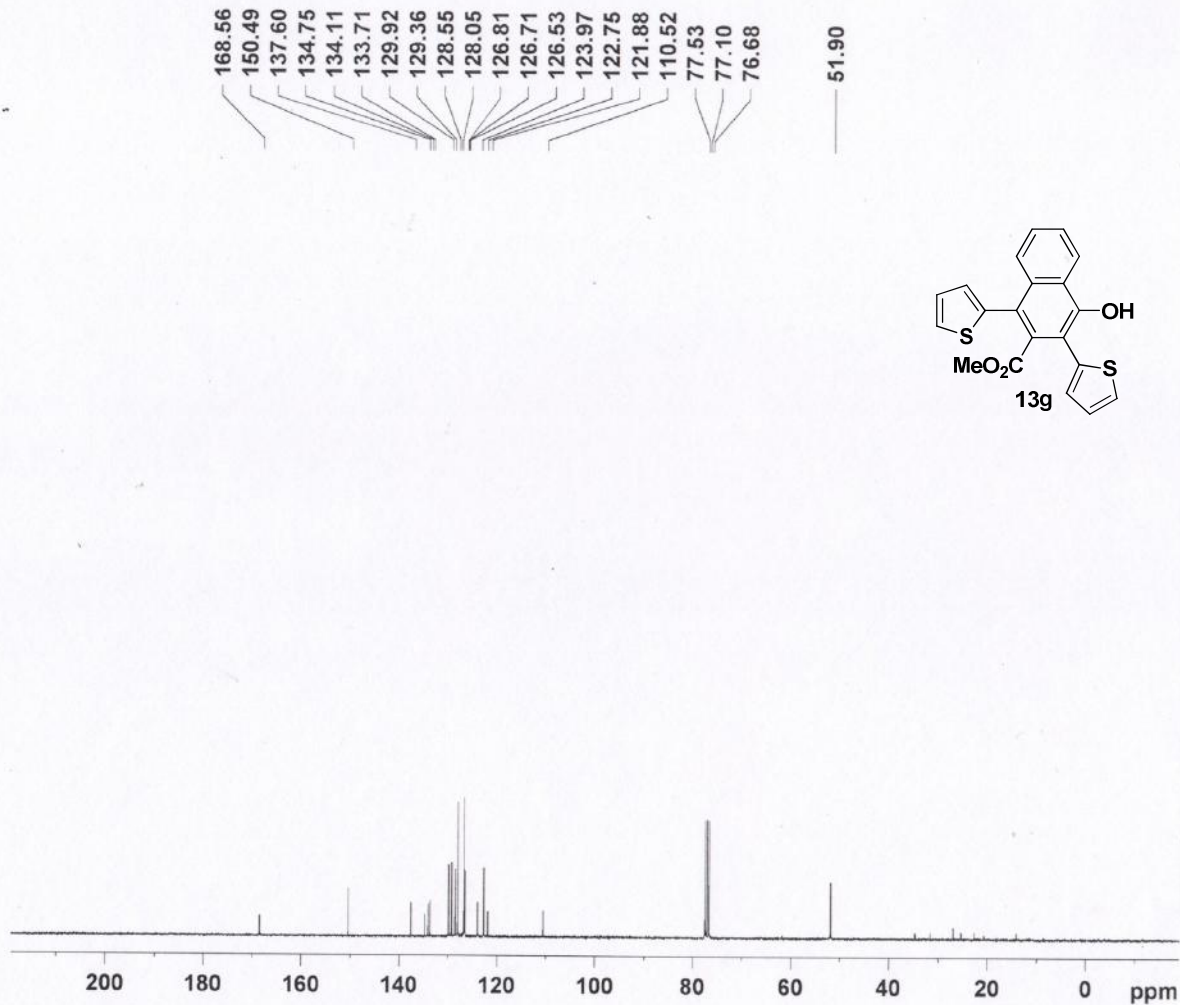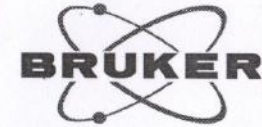

Current Data Parameters  
NAME JK-B-186  
EXPNO 3  
PROCNO 1

F2 - Acquisition Parameters  
Date\_ 20151113  
Time 3.10  
INSTRUM spect  
PROBHD 5 mm DUL 13C-1  
PULPROG zgpg30  
TD 65536  
SOLVENT CDCl3  
NS 200  
DS 4  
SWH 17985.611 Hz  
FIDRES 0.274439 Hz  
AQ 1.8219508 sec  
RG 512  
DW 27.800 usec  
DE 6.00 usec  
TE 300.0 K  
D1 2.00000000 sec  
d11 0.03000000 sec  
DELTA 1.89999998 sec  
TD0 1

===== CHANNEL f1 =====  
NUC1 13C  
P1 10.38 usec  
PL1 0.00 dB  
SFO1 75.4752953 MHz

===== CHANNEL f2 =====  
CPDPRG2 waltz16  
NUC2 1H  
PCPD2 4H  
PL2 0.00 usec  
PL2 0.00 dB  
PL12 15.21 dB  
PL13 16.00 dB  
SFO2 300.1312005 MHz

F2 - Processing parameters  
SI 32768  
SF 75.4677490 MHz  
WDW EM  
SSB 0  
LB 1.00 Hz  
GB 0  
PC 1.40

<sup>13</sup>C-NMR Spectra of Compound 13g

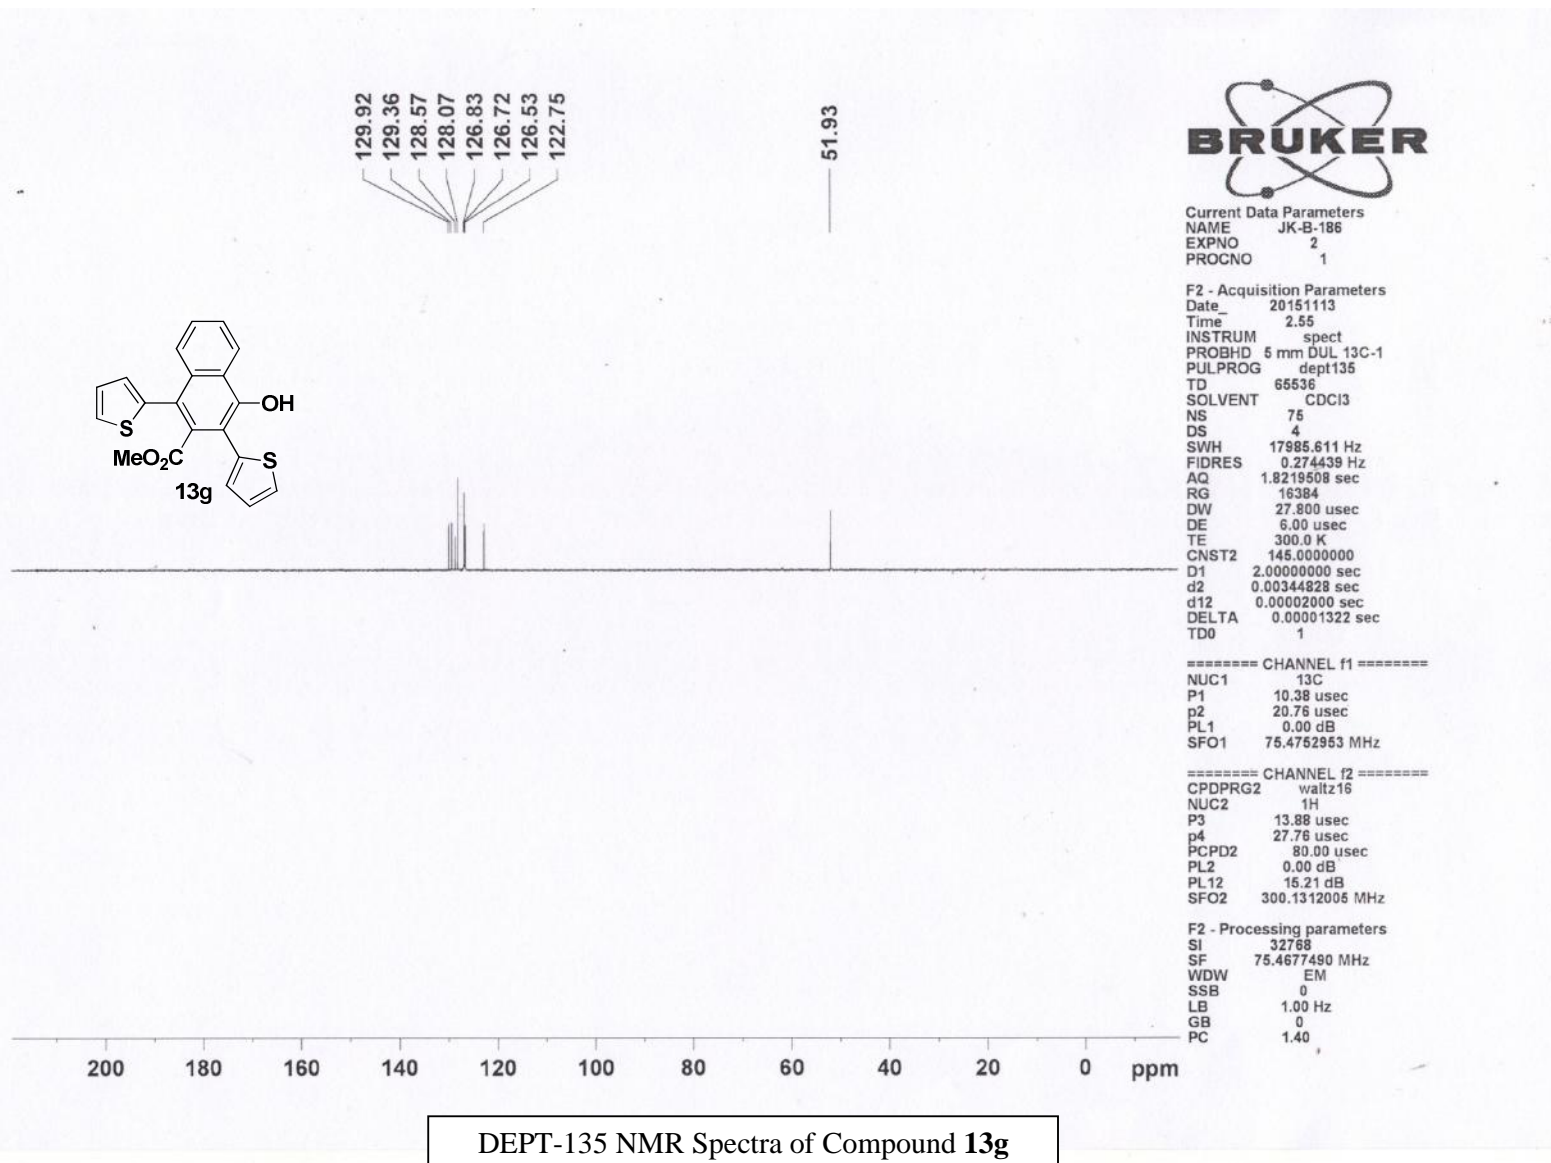

DEPT-135 NMR Spectra of Compound **13g**

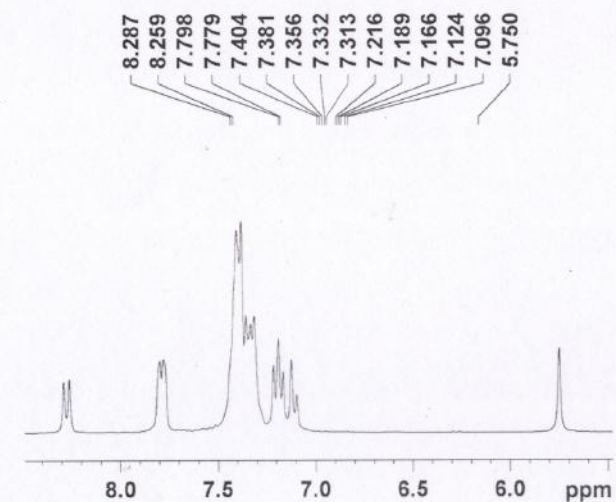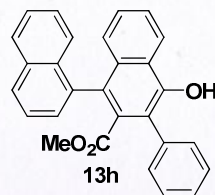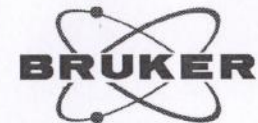

Current Data Parameters  
 NAME JK-B-182  
 EXPNO 1  
 PROCNO 1

F2 - Acquisition Parameters  
 Date\_ 20151107  
 Time 17.09  
 INSTRUM spect  
 PROBHD 5 mm DUL 13C-1  
 PULPROG zg30  
 TD 65536  
 SOLVENT CDCl<sub>3</sub>  
 NS 16  
 DS 2  
 SWH 6172.839 Hz  
 FIDRES 0.094190 Hz  
 AQ 5.3084660 sec  
 RG 40.3  
 DW 81.000 usec  
 DE 6.00 usec  
 TE 300.0 K  
 D1 1.00000000 sec  
 TDO 1

===== CHANNEL f1 =====  
 NUC1 <sup>1</sup>H  
 P1 13.88 usec  
 PL1 0.00 dB  
 SFO1 300.1318534 MHz

F2 - Processing parameters  
 SI 32768  
 SF 300.1300524 MHz  
 WDW EM  
 SSB 0  
 LB 0.30 Hz  
 GB 0  
 PC 1.00

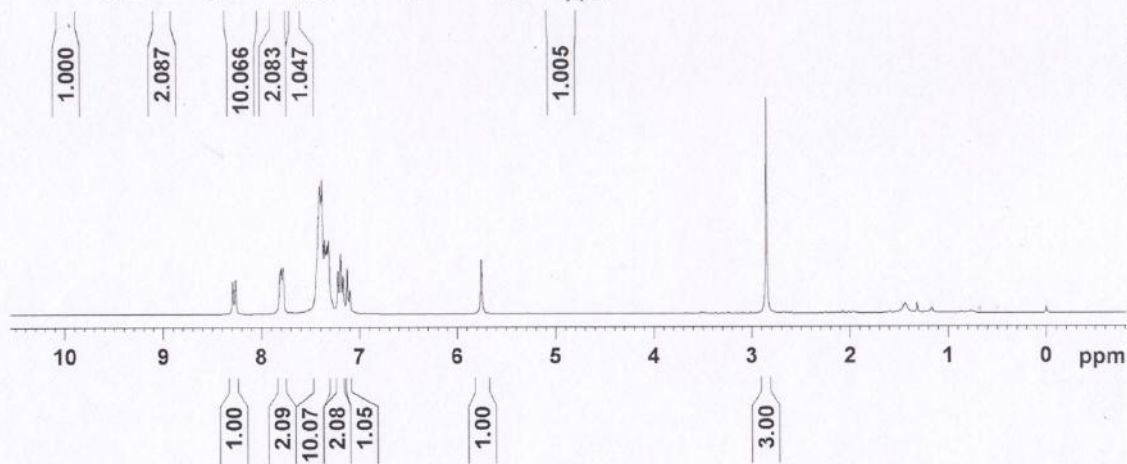

<sup>1</sup>H-NMR Spectra of Compound 13h

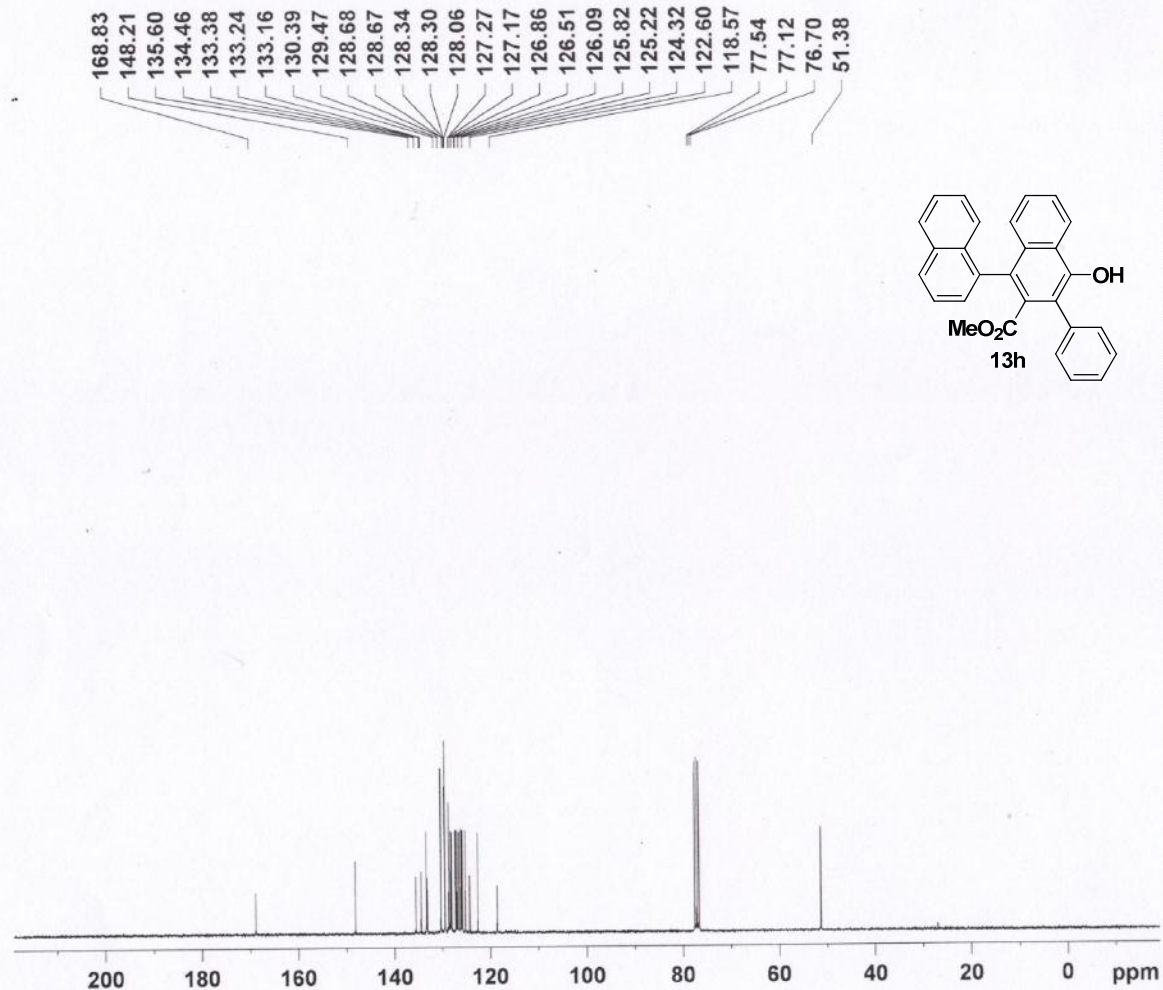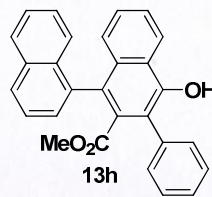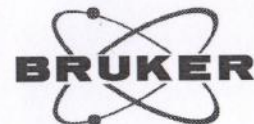

Current Data Parameters  
 NAME JK-B-182  
 EXPNO 3  
 PROCNO 1

F2 - Acquisition Parameters  
 Date\_ 20151107  
 Time\_ 17.55  
 INSTRUM spect  
 PROBHD 5 mm DUL 13C-1  
 PULPROG zgpg30  
 TD 65536  
 SOLVENT CDCl3  
 NS 515  
 DS 4  
 SWH 17985.611 Hz  
 FIDRES 0.274439 Hz  
 AQ 1.8219508 sec  
 RG 512  
 DW 27.800 usec  
 DE 6.00 usec  
 TE 300.0 K  
 D1 2.00000000 sec  
 d11 0.03000000 sec  
 DELTA 1.89999998 sec  
 TD0 1

===== CHANNEL f1 =====  
 NUC1 13C  
 P1 10.38 usec  
 PL1 0.00 dB  
 SFO1 75.4752953 MHz

===== CHANNEL f2 =====  
 CPDPRG2 waltz16  
 NUC2 1H  
 PCPD2 80.00 usec  
 PL2 0.00 dB  
 PL12 15.21 dB  
 PL13 16.00 dB  
 SFO2 300.1312005 MHz

F2 - Processing parameters  
 SI 32768  
 SF 75.4677490 MHz  
 WDW EM  
 SSB 0  
 LB 1.00 Hz  
 GB 0  
 PC 1.40

<sup>13</sup>C-NMR Spectra of Compound 13h



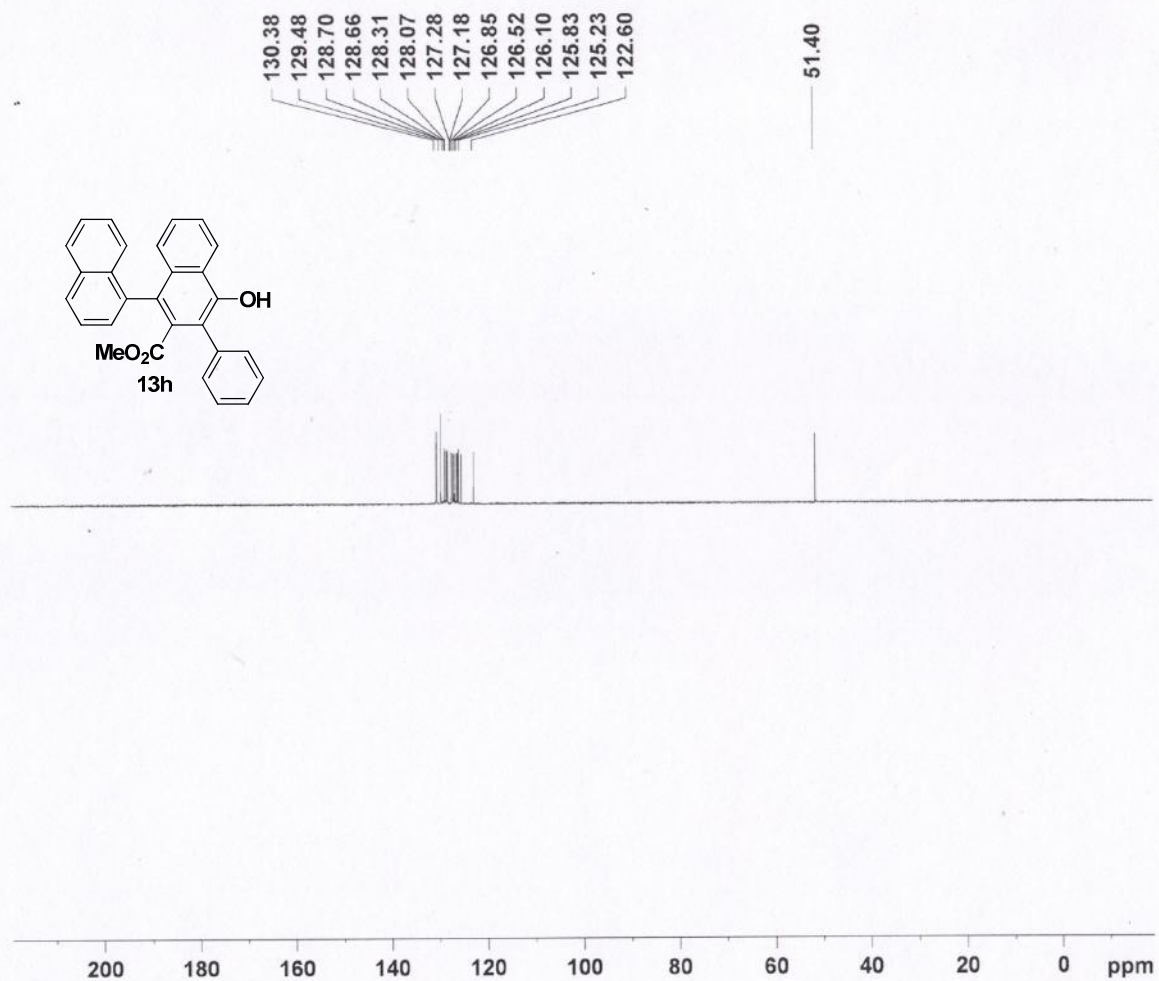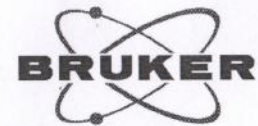

Current Data Parameters  
NAME JK-B-182  
EXPNO 2  
PROCNO 1

F2 - Acquisition Parameters  
Date\_ 20151107  
Time 17.17  
INSTRUM spect  
PROBHD 5 mm DUL 13C-1  
PULPROG dept135  
TD 65536  
SOLVENT CDCl3  
NS 172  
DS 4  
SWH 17985.611 Hz  
FIDRES 0.274439 Hz  
AQ 1.8219508 sec  
RG 16384  
DW 27.800 usec  
DE 6.00 usec  
TE 300.0 K  
CNST2 145.0000000  
D1 2.00000000 sec  
d2 0.00344828 sec  
d12 0.00002000 sec  
DELTA 0.00001322 sec  
TD0 1

===== CHANNEL f1 =====  
NUC1 13C  
P1 10.38 usec  
p2 20.76 usec  
PL1 0.00 dB  
SFO1 75.4752953 MHz

===== CHANNEL f2 =====  
CPDPRG2 waltz16  
NUC2 1H  
P3 13.88 usec  
p4 27.76 usec  
PCPD2 80.00 usec  
PL2 0.00 dB  
PL12 15.21 dB  
SFO2 300.1312005 MHz

F2 - Processing parameters  
SI 32768  
SF 75.4677490 MHz  
WDW EM  
SSB 0  
LB 1.00 Hz  
GB 0  
PC 1.40

DEPT-135 NMR Spectra of Compound **13h**

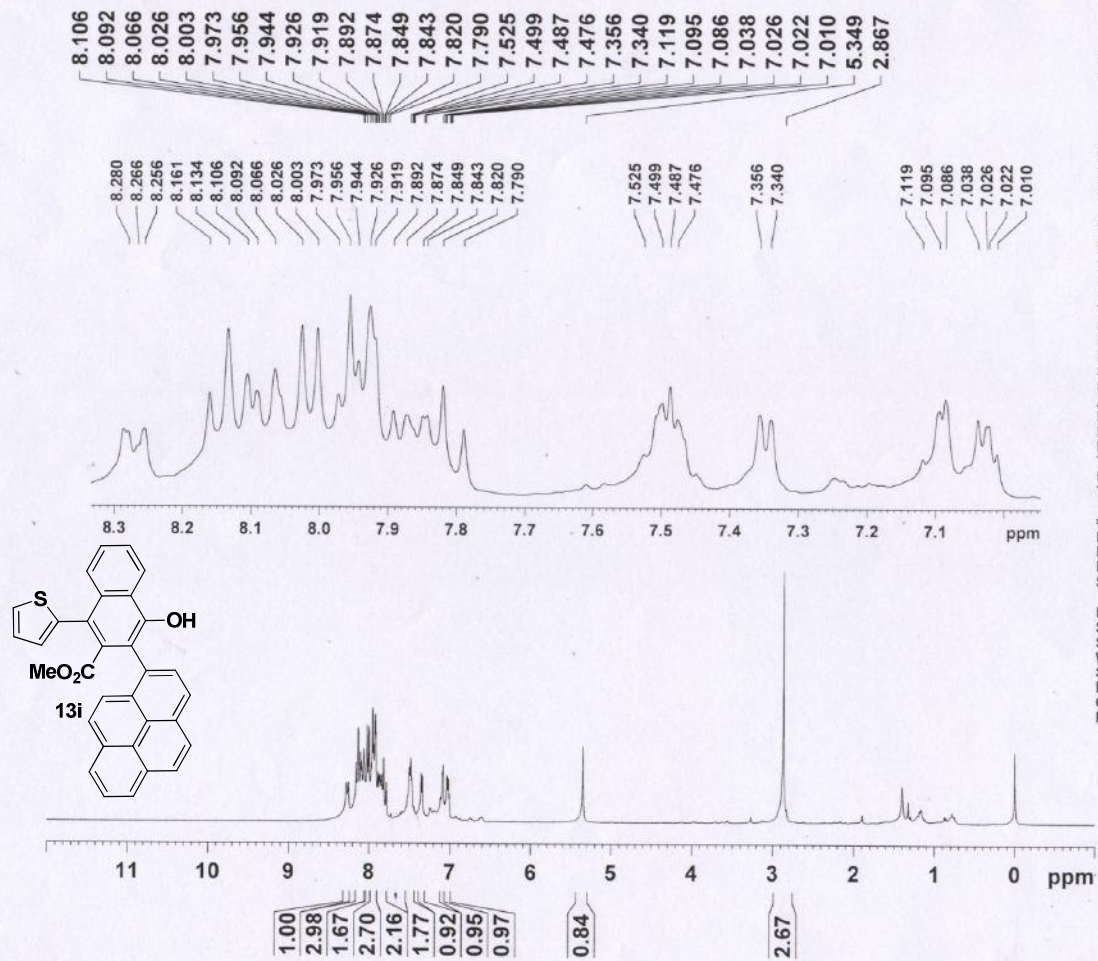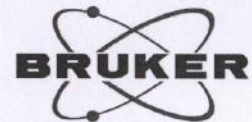

Current Data Parameters  
 NAME JK-B-60  
 EXPNO 4  
 PROCNO 1

F2 - Acquisition Parameters  
 Date\_ 20150411  
 Time 15.59  
 INSTRUM spect  
 PROBHD 5 mm DUL 13C-1  
 PULPROG zg30  
 TD 65536  
 SOLVENT CDCl3  
 NS 13  
 DS 2  
 SWH 6172.839 Hz  
 FIDRES 0.094190 Hz  
 AQ 5.3084660 sec  
 RG 80.6  
 DW 81.000 usec  
 DE 6.00 usec  
 TE 300.0 K  
 D1 1.00000000 sec  
 TD0 1

===== CHANNEL f1 =====  
 NUC1 1H  
 P1 13.15 usec  
 PL1 0.00 dB  
 SFO1 300.1318534 MHz

F2 - Processing parameters  
 SI 32768  
 SF 300.1300492 MHz  
 WDW EM  
 SSB 0  
 LB 0.30 Hz  
 GB 0  
 PC 1.00

<sup>1</sup>H-NMR Spectra of Compound 13i

168.57  
149.57  
137.94  
135.06  
133.94  
131.84  
131.19  
130.95  
130.21  
129.28  
129.08  
128.63  
128.32  
127.64  
127.57  
127.23  
126.75  
126.63  
126.32  
125.60  
125.10  
124.93  
124.70  
124.49  
124.14  
122.57  
122.12  
116.83  
77.42  
76.99  
76.57  
51.47

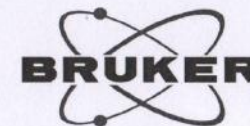

Current Data Parameters  
NAME JK-B-60  
EXPNO 1  
PROCNO 1

F2 - Acquisition Parameters  
Date\_ 20150409  
Time 21.05  
INSTRUM spect  
PROBHD 5 mm DUL 13C-1  
PULPROG zgpg30  
TD 65536  
SOLVENT CDCl3  
NS 719  
DS 4  
SWH 17985.611 Hz  
FIDRES 0.274439 Hz  
AQ 1.8219508 sec  
RG 2298.8  
DW 27.800 usec  
DE 6.00 usec  
TE 300.0 K  
D1 2.00000000 sec  
d11 0.03000000 sec  
DELTA 1.89999998 sec  
TDO 1

===== CHANNEL f1 =====  
NUC1 13C  
P1 9.30 usec  
PL1 0.00 dB  
SFO1 75.4752953 MHz

===== CHANNEL f2 =====  
CPDPRG2 waitz16  
NUC2 1H  
PCPD2 80.00 usec  
PL2 0.00 dB  
PL12 15.68 dB  
PL13 16.00 dB  
SFO2 300.1312005 MHz

F2 - Processing parameters  
SI 32768  
SF 75.4677562 MHz  
WDW EM  
SSB 0  
LB 1.00 Hz  
GB 0  
PC 1.40

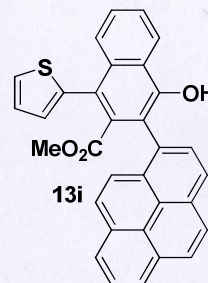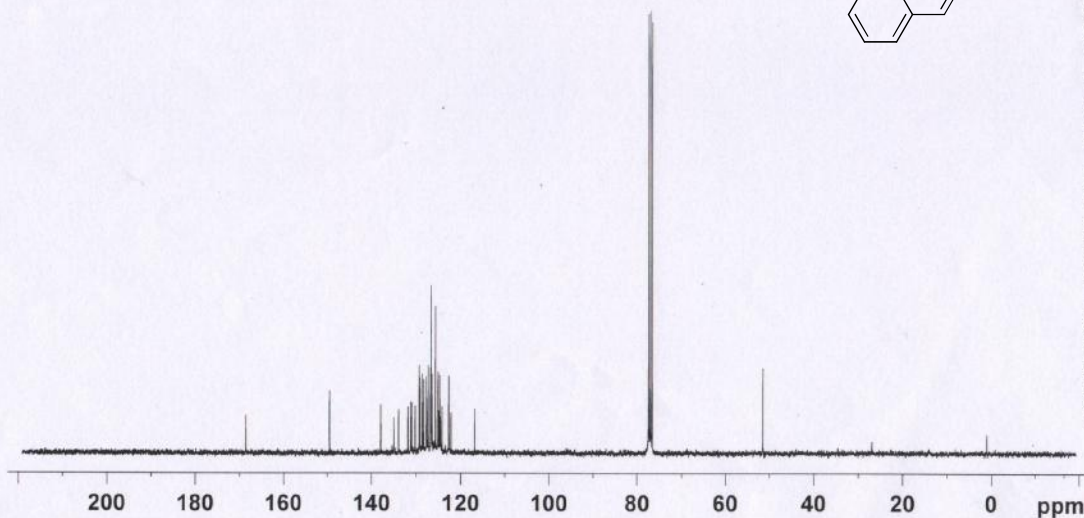

<sup>13</sup>C-NMR Spectra of Compound **13i**



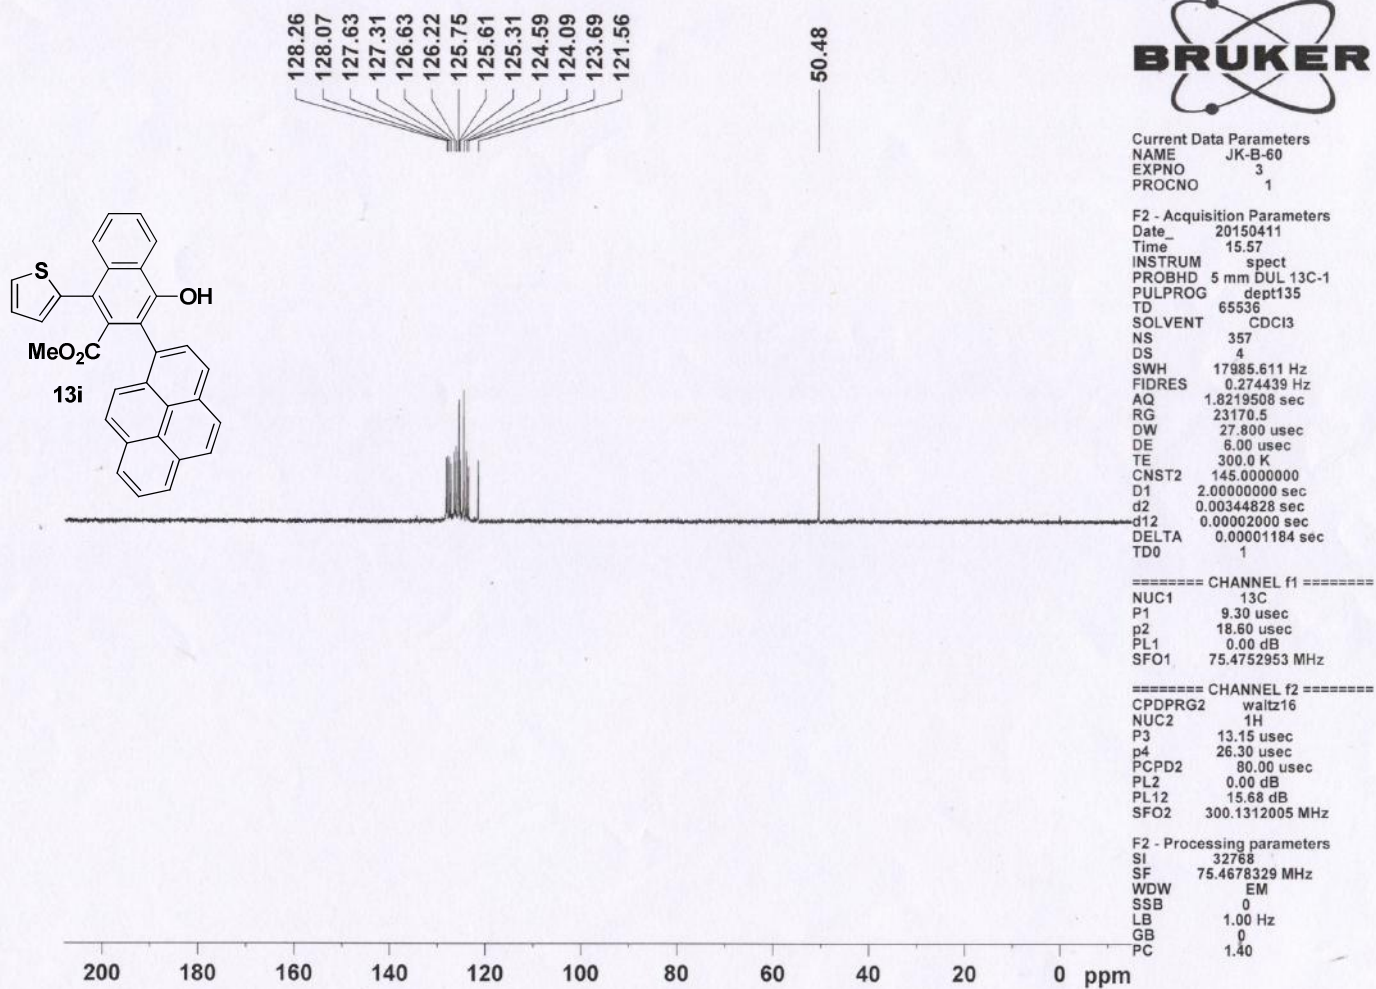

DEPT-135 NMR Spectra of Compound **13i**



8.250  
8.244  
8.219  
7.831  
7.806  
7.800  
7.486  
7.482  
7.472  
7.463  
7.455  
7.450  
7.439  
7.124  
7.108  
7.096  
6.815  
6.803  
6.701  
6.690  
6.065  
3.357  
2.802  
2.777  
2.751  
1.668  
1.645  
1.620  
1.604  
1.557  
1.348  
1.323  
1.308  
1.298  
1.264  
1.256  
1.243  
1.179  
0.845  
0.823  
0.801

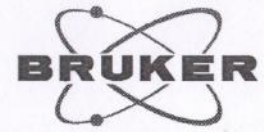

Current Data Parameters  
NAME JK-B-190  
EXPNO 1  
PROCNO 1

F2 - Acquisition Parameters  
Date\_ 20151120  
Time 19.29  
INSTRUM spect  
PROBHD 5 mm DUL 13C-1  
PULPROG zg30  
TD 65536  
SOLVENT CDCl3  
NS 16  
DS 2  
SWH 6172.839 Hz  
FIDRES 0.094190 Hz  
AQ 5.3084660 sec  
RG 90.5  
DW 84.000 usec  
DE 6.00 usec  
TE 300.0 K  
D1 1.00000000 sec  
TD0 1

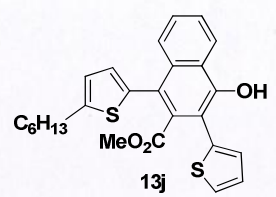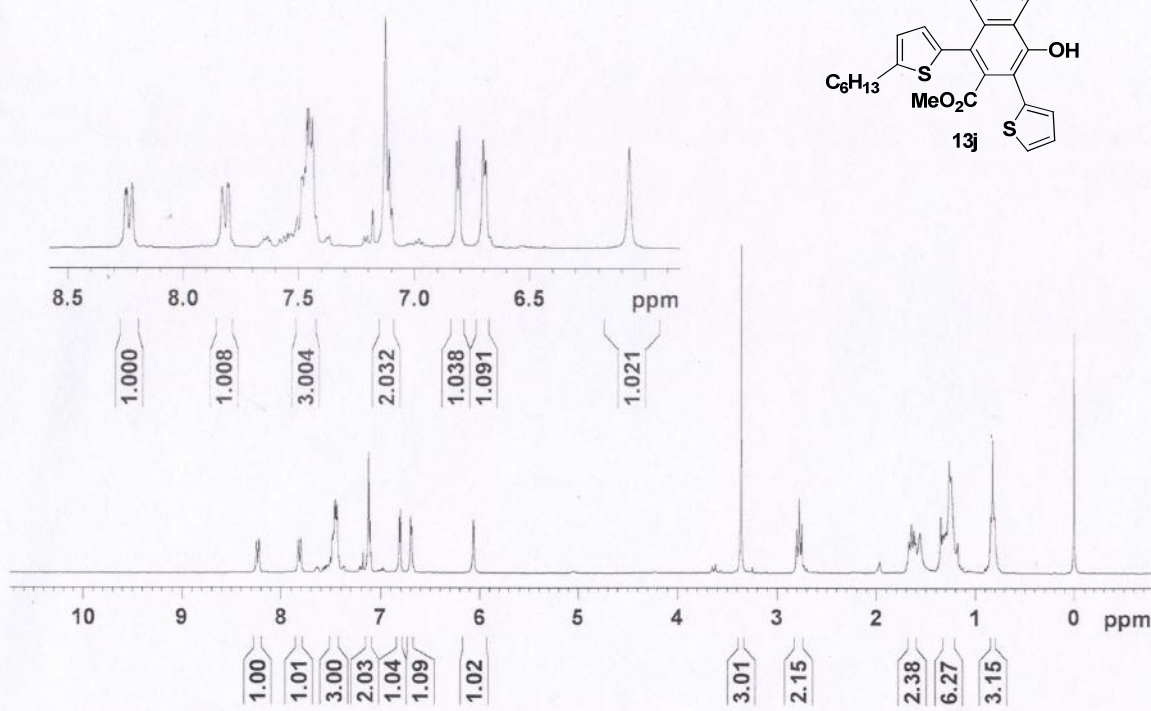

==== CHANNEL f1 =====  
NUC1 1H  
P1 13.88 usec  
PL1 0.00 dB  
SFO1 300.1318534 MHz

F2 - Processing parameters  
SI 32768  
SF 300.1300305 MHz  
WDW EM  
SSB 0  
LB 0.30 Hz  
GB 0  
PC 1.00

<sup>1</sup>H-NMR Spectra of Compound 13j

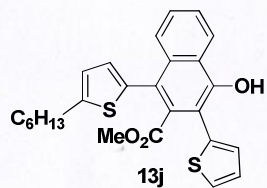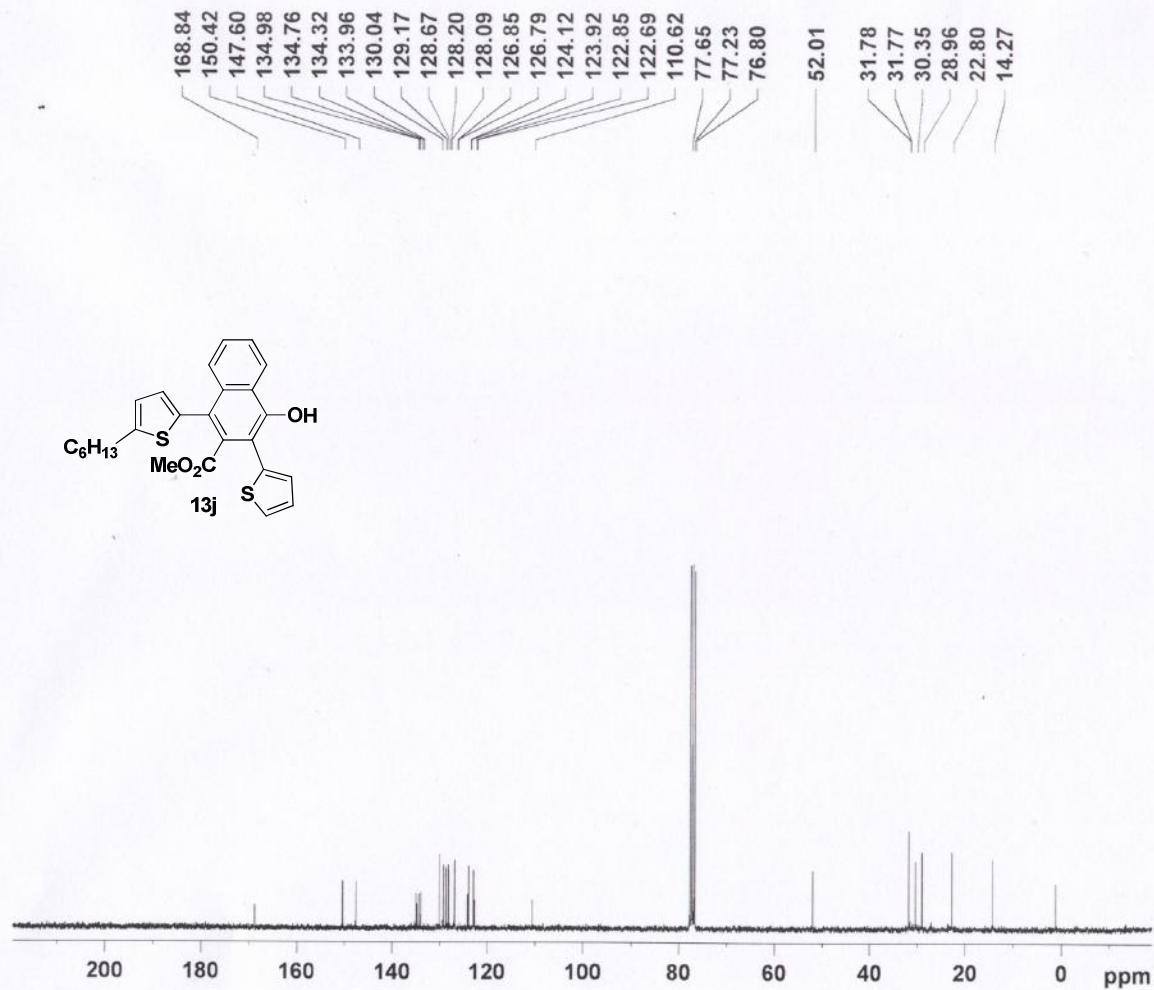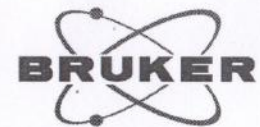

Current Data Parameters  
 NAME JK-B-190  
 EXPNO 3  
 PROCNO 1

F2 - Acquisition Parameters  
 Date\_ 20161120  
 Time\_ 20.06  
 INSTRUM spect  
 PROBHD 5 mm DUL 13C-1  
 PULPROG zgpg30  
 TD 65536  
 SOLVENT CDCl3  
 NS 400  
 DS 4  
 SWH 17986.611 Hz  
 FIDRES 0.274439 Hz  
 AQ 1.8219608 sec  
 RG 612  
 DW 27.800 usec  
 DE 6.00 usec  
 TE 300.0 K  
 D1 2.00000000 sec  
 d11 0.03000000 sec  
 DELTA 1.89999998 sec  
 TD0 1

===== CHANNEL f1 =====  
 NUC1 13C  
 P1 10.38 usec  
 PL1 0.00 dB  
 SFO1 75.4752953 MHz

===== CHANNEL f2 =====  
 CPDPRG2 waltz16  
 NUC2 1H  
 PCPD2 80.00 usec  
 PL2 0.00 dB  
 PL12 15.21 dB  
 PL13 16.00 dB  
 SFO2 300.1312005 MHz

F2 - Processing parameters  
 SI 32768  
 SF 75.4677348 MHz  
 WDW EM  
 SSB 0  
 LB 1.00 Hz  
 GB 0  
 PC 1.40

<sup>13</sup>C-NMR Spectra of Compound 13j

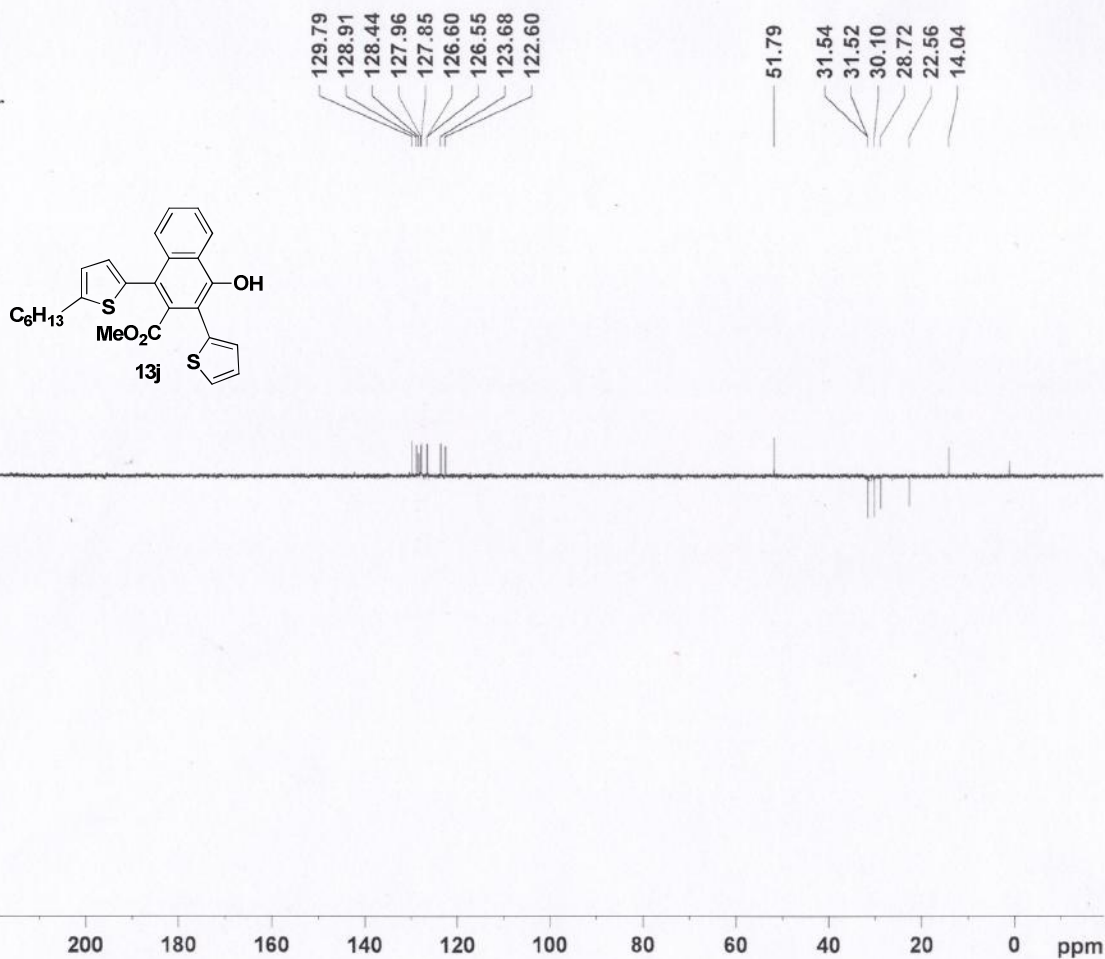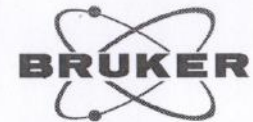

Current Data Parameters  
 NAME JK-B-190  
 EXPNO 2  
 PROCNO 1

F2 - Acquisition Parameters  
 Date\_ 20151120  
 Time\_ 19.35  
 INSTRUM spect  
 PROBHD 5 mm DUL 13C-1  
 PULPROG dept135  
 TD 65536  
 SOLVENT CDCl3  
 NS 100  
 DS 4  
 SWH 17985.611 Hz  
 FIDRES 0.274439 Hz  
 AQ 1.8219508 sec  
 RG 16384  
 DW 27.800 usec  
 DE 6.00 usec  
 TE 300.0 K  
 CNST2 145.000000  
 D1 2.0000000 sec  
 d2 0.00344828 sec  
 d12 0.00002000 sec  
 DELTA 0.00001322 sec  
 TD0 1

===== CHANNEL f1 =====  
 NUC1 13C  
 P1 10.38 usec  
 p2 20.76 usec  
 PL1 0.00 dB  
 SFO1 75.4752953 MHz

===== CHANNEL f2 =====  
 CPDPRG2 waltz16  
 NUC2 1H  
 P3 13.88 usec  
 p4 27.76 usec  
 PCPD2 80.00 usec  
 PL2 0.00 dB  
 PL12 15.21 dB  
 SFO2 300.1312005 MHz

F2 - Processing parameters  
 SI 32768  
 SF 75.4677541 MHz  
 WDW EM  
 SSB 0  
 LB 1.00 Hz  
 GB 0  
 PC 1.40

DEPT-135 NMR Spectra of Compound 13j

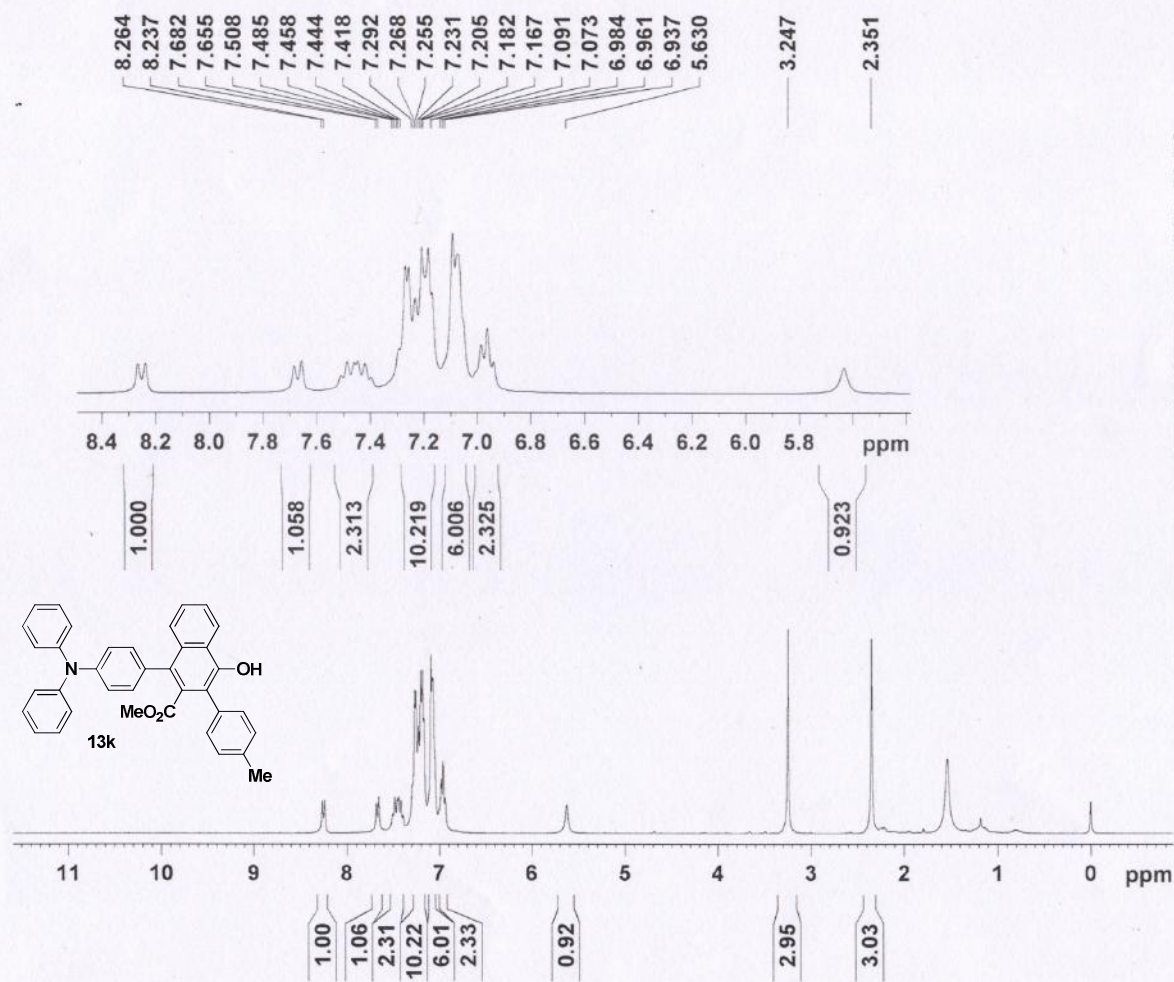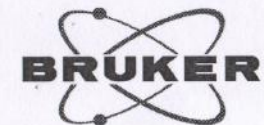

Current Data Parameters  
 NAME JK-B-TPA-THI-NAPH  
 EXPNO 1  
 PROCNO 1

F2 - Acquisition Parameters  
 Date\_ 20151106  
 Time 20.15  
 INSTRUM spect  
 PROBHD 5 mm DUL 13C-1  
 PULPROG zg30  
 TD 65536  
 SOLVENT CDCl3  
 NS 16  
 DS 2  
 SWH 6172.839 Hz  
 FIDRES 0.094190 Hz  
 AQ 5.3084660 sec  
 RG 181  
 DW 81.000 usec  
 DE 6.00 usec  
 TE 300.0 K  
 D1 1.0000000 sec  
 TD0 1

===== CHANNEL f1 =====  
 NUC1 1H  
 P1 13.88 usec  
 PL1 0.00 dB  
 SFO1 300.1318534 MHz

F2 - Processing parameters  
 SI 32768  
 SF 300.1300294 MHz  
 WDW EM  
 SSB 0  
 LB 0.30 Hz  
 GB 0  
 PC 1.00

<sup>1</sup>H-NMR Spectra of Compound 13k



univ. of madras

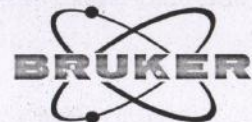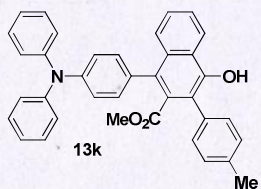

168.21  
146.78  
146.70  
137.44  
131.55  
131.47  
130.82  
130.36  
130.01  
129.13  
129.08  
128.25  
125.95  
125.71  
125.26  
123.39  
121.99  
121.90  
121.48  
117.22  
76.43  
76.01  
75.58  
50.48  
20.30

Current Data Parameters  
NAME JK-B-58  
EXPNO 2  
PROCNO 1

F2 - Acquisition Parameters  
Date\_ 20150409  
Time\_ 14.00  
INSTRUM spect  
PROBHD 5 mm DUL 13C-1  
PULPROG zgpg30  
TD 65536  
SOLVENT CDCl3  
NS 567  
DS 4  
SWH 17985.611 Hz  
FIDRES 0.274439 Hz  
AQ 1.8219508 sec  
RG 1824.6  
DW 27.800 usec  
DE 6.00 usec  
TE 300.0 K  
D1 2.0000000 sec  
d11 0.0300000 sec  
DELTA 1.8999999 sec  
TD0 1

===== CHANNEL f1 =====  
NUC1 13C  
P1 9.30 usec  
PL1 0.00 dB  
SFO1 75.4752953 MHz

===== CHANNEL f2 =====  
CPDPRG2 waltz16  
NUC2 1H  
PCPD2 80.00 usec  
PL2 0.00 dB  
PL12 15.68 dB  
PL13 16.00 dB  
SFO2 300.1312005 MHz

F2 - Processing parameters  
SI 32768  
SF 75.4678311 MHz  
WDW EM  
SSB 0  
LB 1.00 Hz  
GB 0  
PC 1.40

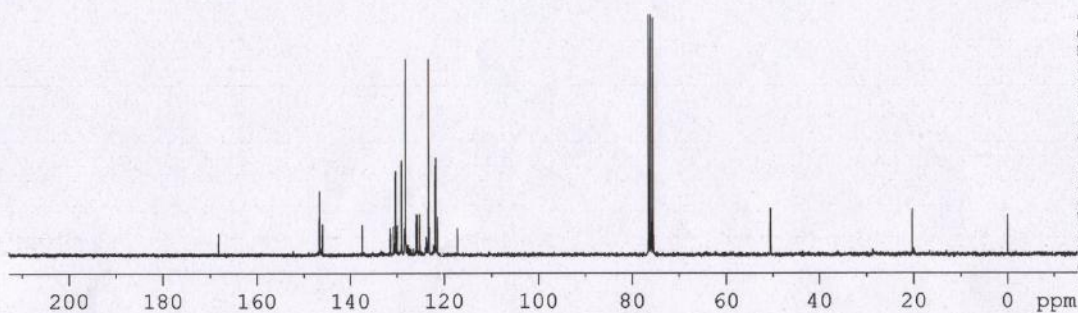

<sup>13</sup>C-NMR Spectra of Compound 13k

univ. of madras

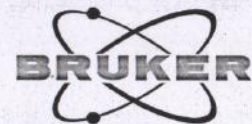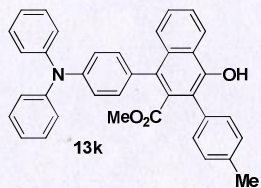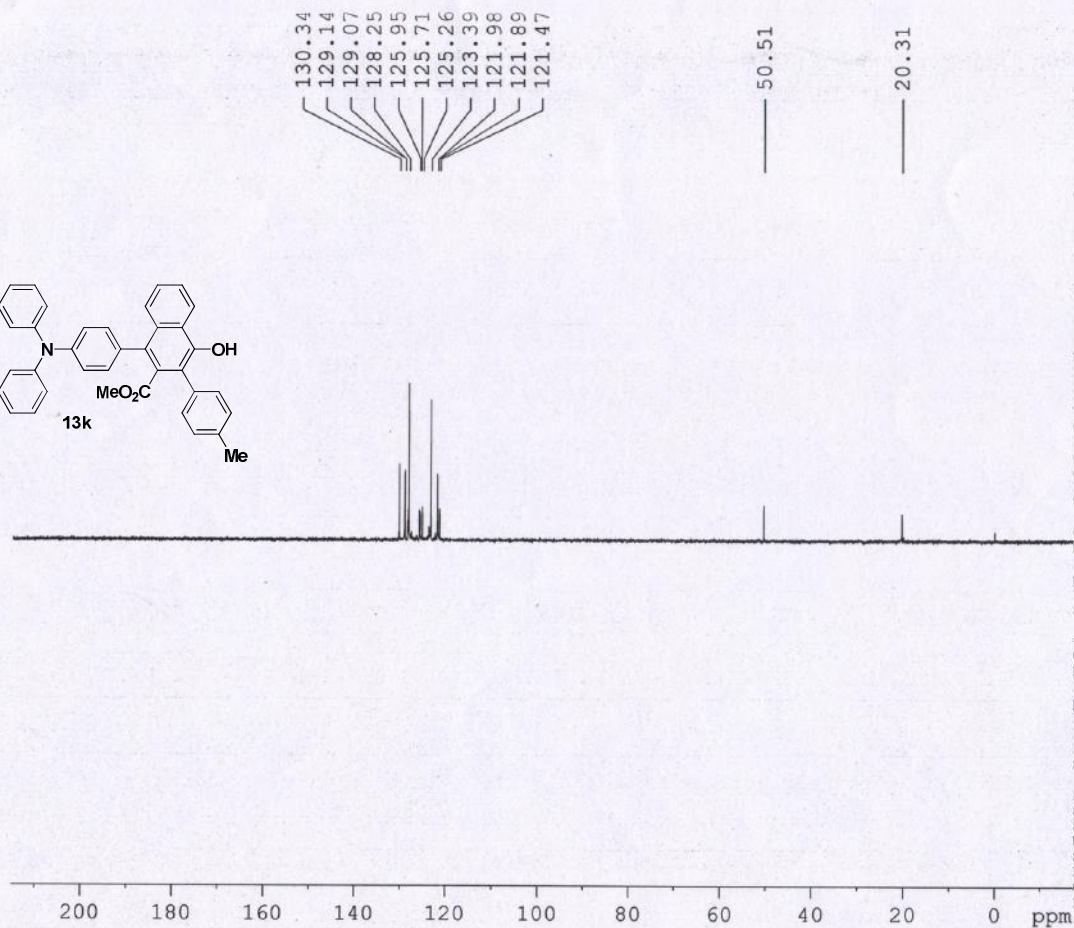

Current Data Parameters  
NAME JK-B-58  
EXPNO 1  
PROCNO 1

F2 - Acquisition Parameters  
Date 20150409  
Time 13.39  
INSTRUM spect  
PROBHD 5 mm DUL 13C-1  
PULPROG dept135  
TD 65536  
SOLVENT CDCl3  
NS 130  
DS 4  
SWH 17985.611 Hz  
FIDRES 0.274439 Hz  
AQ 1.8219508 sec  
RG 16384  
DW 27.800 usec  
DE 6.00 usec  
TE 300.0 K  
CNST2 145.0000000  
D1 2.00000000 sec  
d2 0.00344828 sec  
d12 0.00002000 sec  
DELTA 0.00001184 sec  
TDO 1

===== CHANNEL f1 =====  
NUC1 13C  
P1 9.30 usec  
p2 18.60 usec  
PL1 0.00 dB  
SF01 75.4752953 MHz

===== CHANNEL f2 =====  
CPDPRG2 waltz16  
NUC2 1H  
P3 13.15 usec  
p4 26.30 usec  
PCPD2 80.00 usec  
PL2 0.00 dB  
PL12 15.68 dB  
SFO2 300.1312005 MHz

F2 - Processing parameters  
SI 32768  
SF 75.4678317 MHz  
WDW EM  
SSB 0  
LB 1.00 Hz  
GB 0  
PC 1.40

DEPT-135 NMR Spectra of Compound 13k



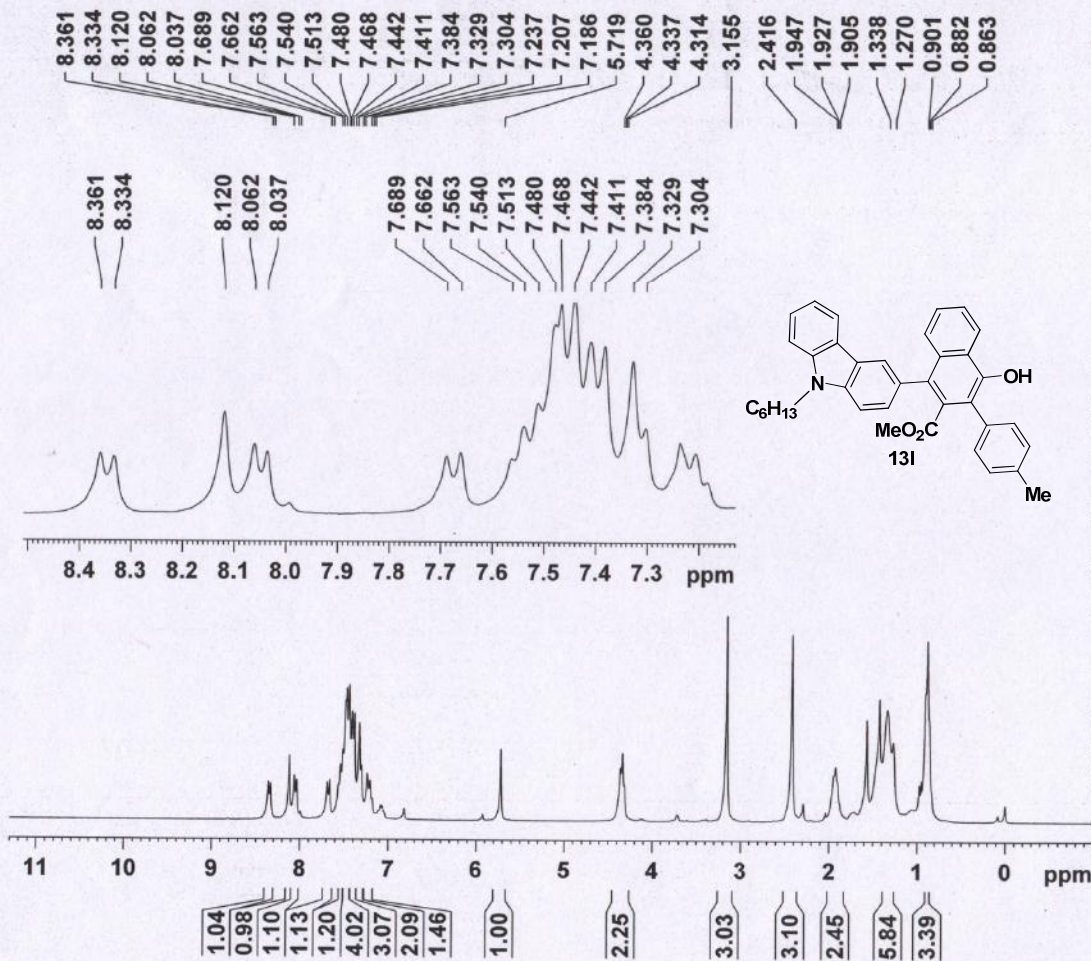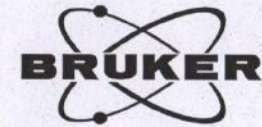

Current Data Parameters  
 NAME JK-B-10  
 EXPNO 1  
 PROCNO 1

F2 - Acquisition Parameters  
 Date\_ 20150306  
 Time 21.17  
 INSTRUM spect  
 PROBHD 5 mm DUL 13C-1  
 PULPROG zg30  
 TD 65536  
 SOLVENT CDCl3  
 NS 12  
 DS 2  
 SWH 6172.839 Hz  
 FIDRES 0.094190 Hz  
 AQ 5.3084660 sec  
 RG 80.6  
 DW 81.000 usec  
 DE 6.00 usec  
 TE 300.0 K  
 D1 1.00000000 sec  
 TDO 1

===== CHANNEL f1 =====  
 NUC1 1H  
 P1 13.15 usec  
 PL1 0.00 dB  
 SFO1 300.1318534 MHz

F2 - Processing parameters  
 SI 32768  
 SF 300.1300136 MHz  
 WDW EM  
 SSB 0  
 LB 0.30 Hz  
 GB 0  
 PC 1.00

<sup>1</sup>H-NMR Spectra of Compound 13I

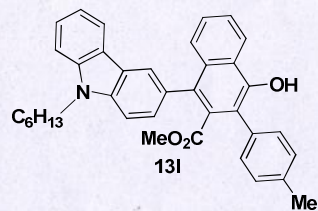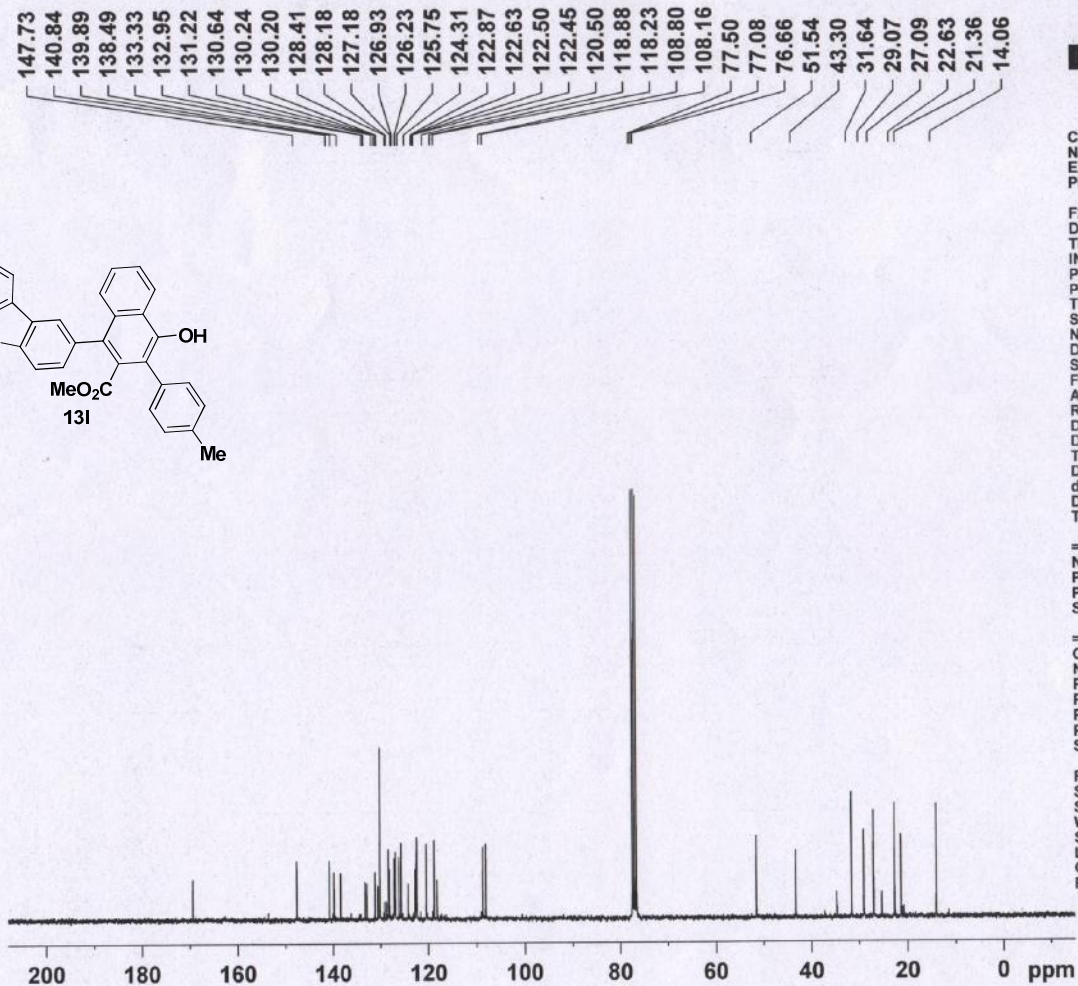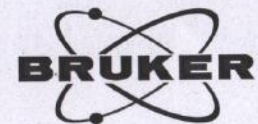

Current Data Parameters  
 NAME JK-B-10  
 EXPNO 2  
 PROCNO 1

F2 - Acquisition Parameters  
 Date\_ 20150307  
 Time 15.10  
 INSTRUM spect  
 PROBHD 5 mm DUL 13C-1  
 PULPROG zgpg30  
 TD 65536  
 SOLVENT CDCl3  
 NS 903  
 DS 4  
 SWH 17985.611 Hz  
 FIDRES 0.274439 Hz  
 AQ 1.8219508 sec  
 RG 1149.4  
 DW 27.800 usec  
 DE 6.00 usec  
 TE 300.0 K  
 D1 2.00000000 sec  
 d11 0.03000000 sec  
 DELTA 1.89999998 sec  
 TDO 1

===== CHANNEL f1 =====  
 NUC1 13C  
 P1 9.30 usec  
 PL1 0.00 dB  
 SFO1 75.4752953 MHz

===== CHANNEL f2 =====  
 CPDPRG2 waltz16  
 NUC2 1H  
 PCPD2 80.00 usec  
 PL2 0.00 dB  
 PL12 15.68 dB  
 PL13 16.00 dB  
 SFO2 300.1312005 MHz

F2 - Processing parameters  
 SI 32768  
 SF 75.4677490 MHz  
 WDW EM  
 SSB 0  
 LB 1.00 Hz  
 GB 0  
 PC 1.40

$^{13}C$ -NMR Spectra of Compound **13l**



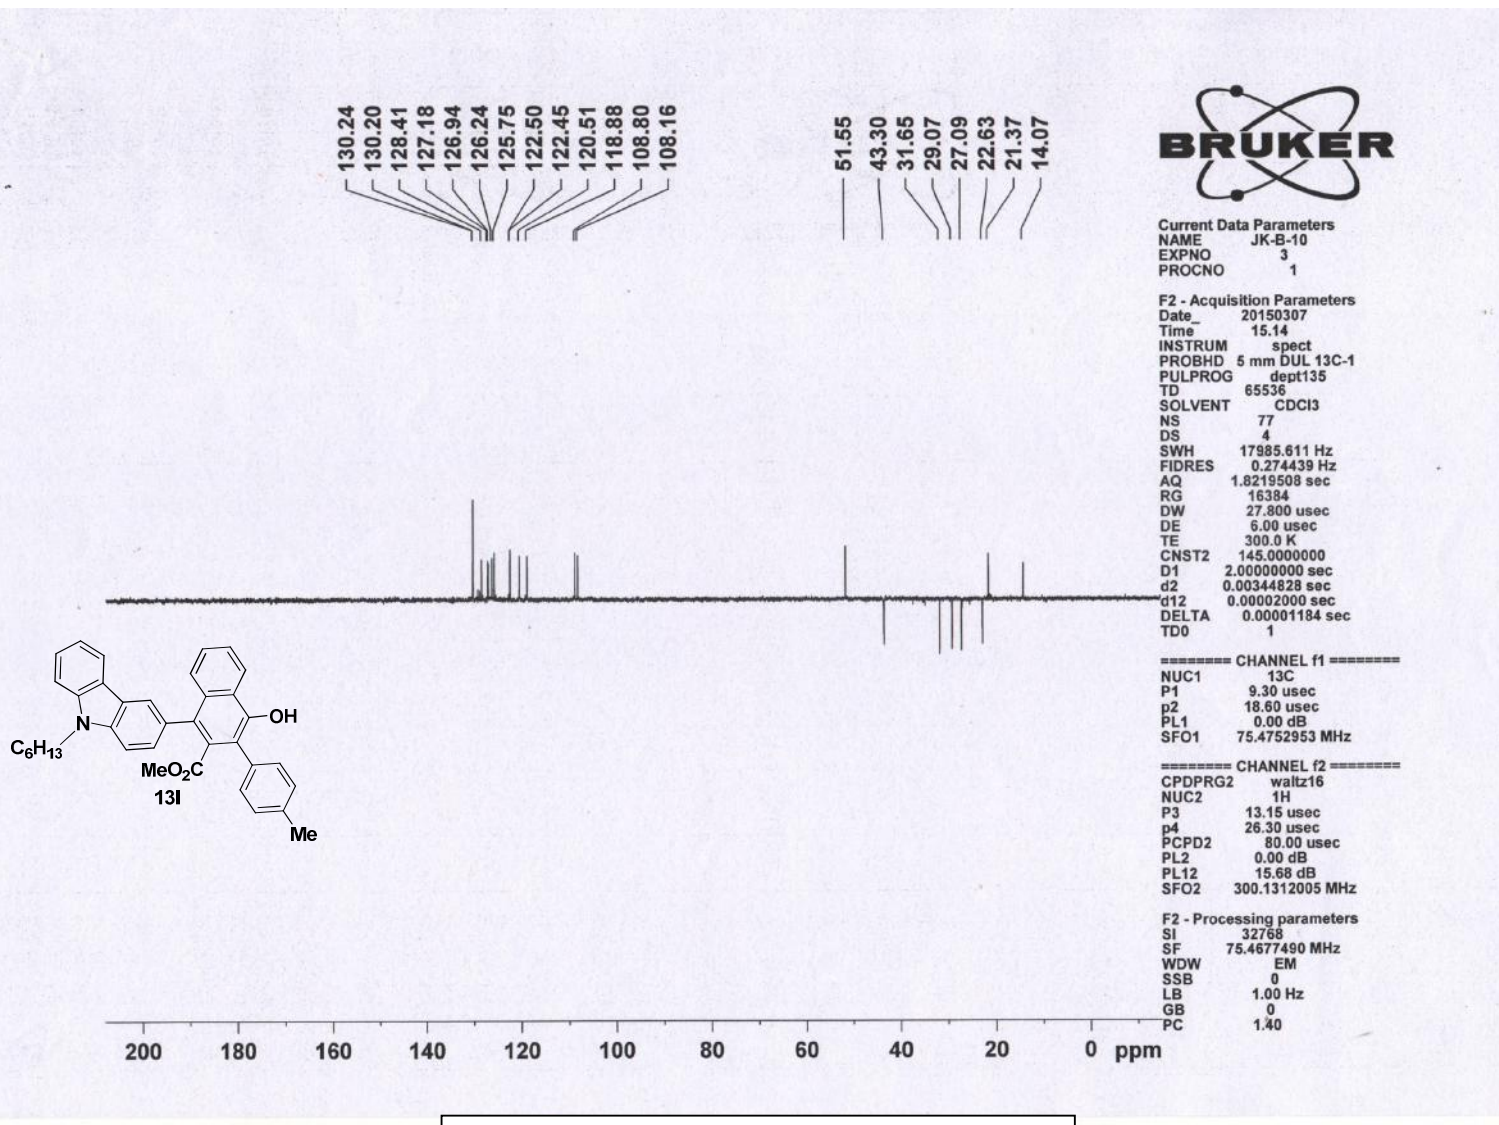

DEPT-135 NMR Spectra of Compound 131

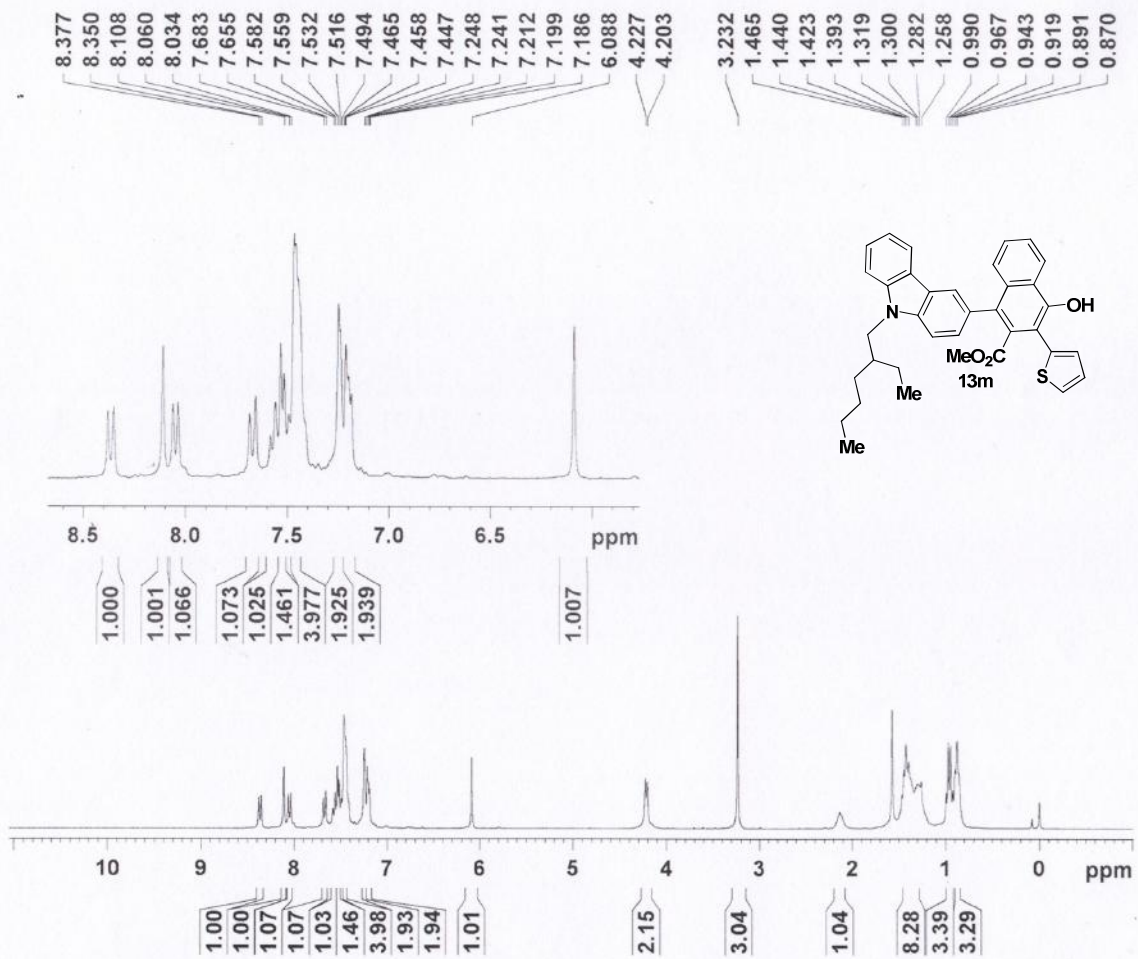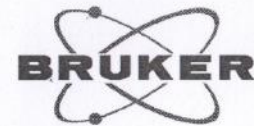

Current Data Parameters  
 NAME JK-B-26A  
 EXPNO 4  
 PROCNO 1

F2 - Acquisition Parameters  
 Date 20150319  
 Time 16.34  
 INSTRUM spect  
 PROBHD 5 mm DUL 13C-1  
 PULPROG zg30  
 TD 65536  
 SOLVENT CDCl3  
 NS 6  
 DS 2  
 SWH 6172.839 Hz  
 FIDRES 0.094190 Hz  
 AQ 5.3084660 sec  
 RG 128  
 DW 81.000 usec  
 DE 6.00 usec  
 TE 300.0 K  
 D1 1.00000000 sec  
 TD0 1

===== CHANNEL f1 =====  
 NUC1 1H  
 P1 13.15 usec  
 PL1 0.00 dB  
 SFO1 300.1318534 MHz

F2 - Processing parameters  
 SI 32768  
 SF 300.1300105 MHz  
 WDW EM  
 SSB 0  
 LB 0.30 Hz  
 GB 0  
 PC 1.00

<sup>1</sup>H-NMR Spectra of Compound 13m

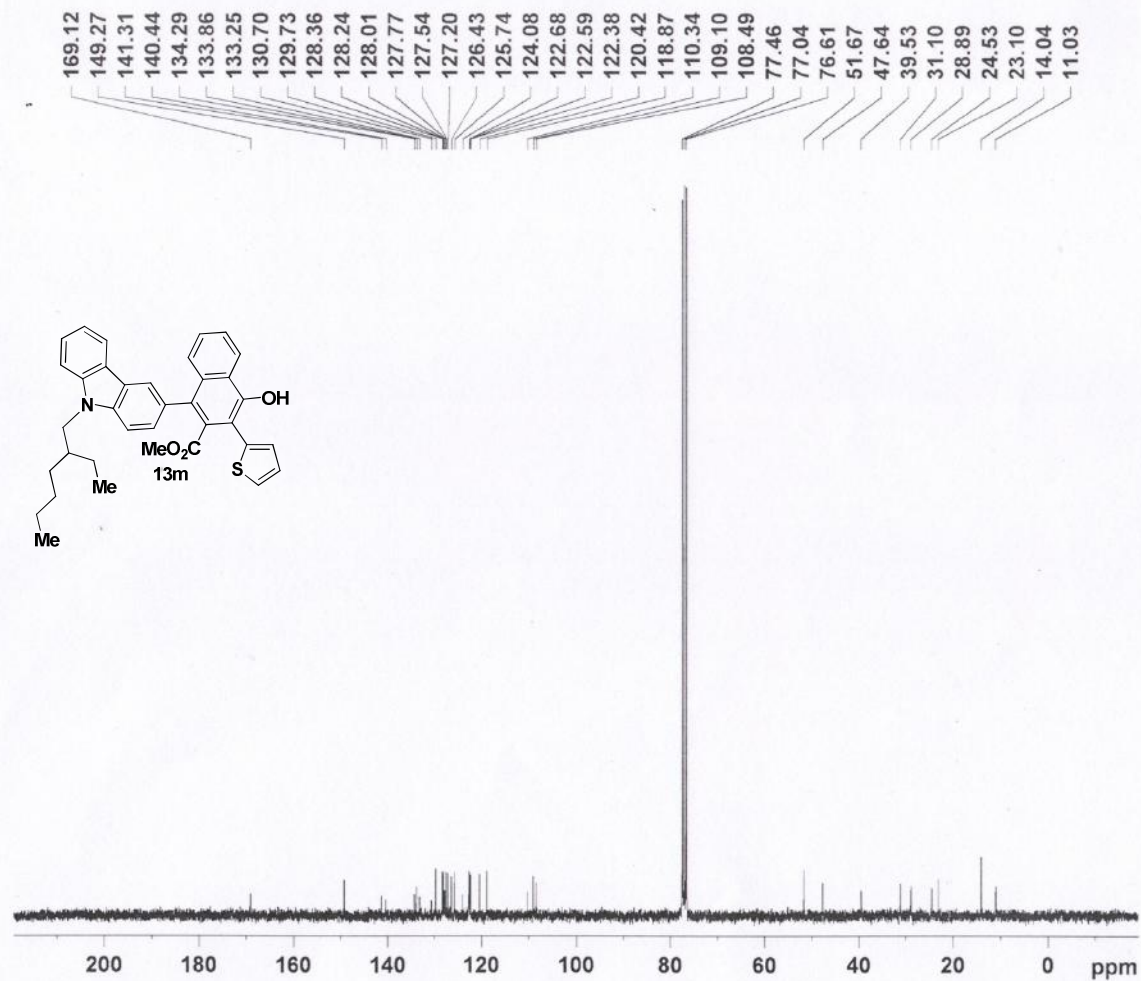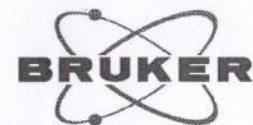

Current Data Parameters  
 NAME JK-B-26A  
 EXPNO 3  
 PROCNO 1

F2 - Acquisition Parameters  
 Date\_ 20150319  
 Time 16.33  
 INSTRUM spect  
 PROBHD 5 mm DUL 13C-1  
 PULPROG zgpg30  
 TD 65538  
 SOLVENT CDCl3  
 NS 408  
 DS 4  
 SWH 17985.611 Hz  
 FIDRES 0.274439 Hz  
 AQ 1.8219608 sec  
 RG 2580.3  
 DW 27.800 usec  
 DE 6.00 usec  
 TE 300.0 K  
 D1 2.00000000 sec  
 d11 0.03000000 sec  
 DELTA 1.89999998 sec  
 TDO 1

===== CHANNEL f1 =====  
 NUC1 13C  
 P1 9.30 usec  
 PL1 0.00 dB  
 SFO1 75.4752963 MHz

===== CHANNEL f2 =====  
 CPDPRG2 waltz16  
 NUC2 1H  
 PCPD2 80.00 usec  
 PL2 0.00 dB  
 PL12 15.68 dB  
 PL13 16.00 dB  
 SFO2 300.1312005 MHz

F2 - Processing parameters  
 SI 32768  
 SF 75.4677490 MHz  
 WDW EM  
 SSB 0  
 LB 1.00 Hz  
 GB 0  
 PC 1.40

<sup>13</sup>C-NMR Spectra of Compound 13m



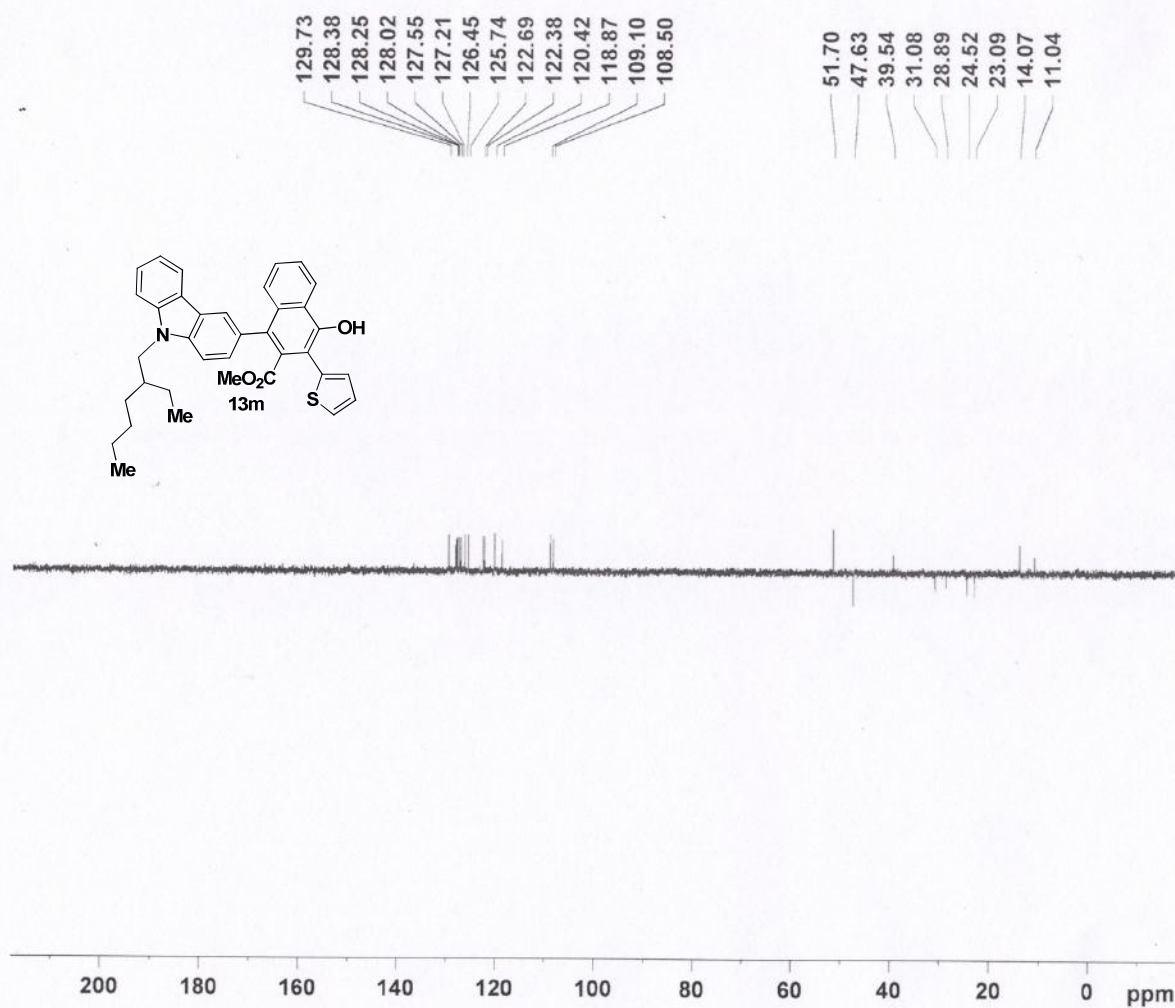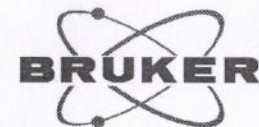

Current Data Parameters  
NAME JK-B-26A  
EXPNO 2  
PROCNO 1

F2 - Acquisition Parameters  
Date\_ 20150319  
Time 16.05  
INSTRUM spect  
PROBHD 5 mm DUL 13C-1  
PULPROG dept135  
TD 65536  
SOLVENT CDCl<sub>3</sub>  
NS 150  
DS 4  
SWH 17985.611 Hz  
FIDRES 0.274439 Hz  
AQ 1.8219508 sec  
RG 16384  
DW 27.800 usec  
DE 6.00 usec  
TE 300.0 K  
CNST2 145.000000  
D1 2.00000000 sec  
d2 0.00344828 sec  
d12 0.00002000 sec  
DELTA 0.00001184 sec  
TD0 1

===== CHANNEL f1 =====  
NUC1 13C  
P1 9.30 usec  
p2 18.60 usec  
PL1 0.00 dB  
SFO1 75.4752953 MHz

===== CHANNEL f2 =====  
CPDPRG2 waltz16  
NUC2 1H  
P3 13.15 usec  
p4 26.30 usec  
PCPD2 80.00 usec  
PL2 0.00 dB  
PL12 15.68 dB  
SFO2 300.1312005 MHz

F2 - Processing parameters  
SI 32768  
SF 75.4677490 MHz  
WDW EM  
SSB 0  
LB 1.00 Hz  
GB 0  
PC 1.40

DEPT-135 NMR Spectra of Compound **13m**



Crystallographic data of  $\beta$ -keto-ester **3e**:

CCDC Number is **997379**.

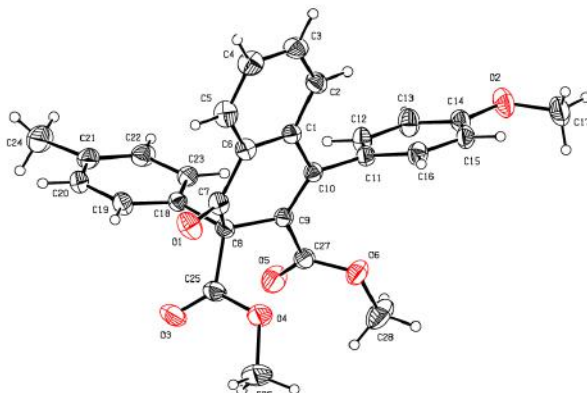

### Computing details

Program(s) used to solve structure: *SHELXS97* (Sheldrick, 1990); program(s) used to refine structure: *SHELXL97* (Sheldrick, 1997). Computer programs: *SHELXS97* (Sheldrick, 1990), *SHELXL97* (Sheldrick, 1997).

## Dimethyl-4-(4-methoxyphenyl)-1-oxo-2-*p*-tolyl-1,2-dihydronaphthalene-2,3-dicarboxylate (**3e**)

# Experimental

### Crystal data

$C_{28}H_{24}O_6$

$M_r = 456.47$

$a = 7.5256(2) \text{ \AA}$

$b = 10.2095(3) \text{ \AA}$

$c = 15.6299(4) \text{ \AA}$

$\alpha = 93.990(1)^\circ$

$\beta = 94.679(1)^\circ$

$\gamma = 101.089(2)^\circ$

$V = 1170.06(6) \text{ \AA}^3$

$Z = 2$

$F(000) = 480$

$D_x = 1.296 \text{ Mg m}^{-3}$

Mo  $K\alpha$  radiation,  $\lambda = 0.71073 \text{ \AA}$

$\mu = 0.09 \text{ mm}^{-1}$

$T = 293 \text{ K}$

### Data collection

Radiation source: fine-focus sealed tube

$R_{\text{int}} = 0.027$

Graphite monochromator

$\theta_{\text{max}} = 25.0^\circ$ ,  $\theta_{\text{min}} = 2.3^\circ$

22413 measured reflections

$h = -8 \rightarrow 8$

4119 independent reflections

$k = -12 \rightarrow 12$

3346 reflections with  $I > 2\sigma(I)$

$l = -18 \rightarrow 18$

## Refinement

|                                 |                                                                                     |
|---------------------------------|-------------------------------------------------------------------------------------|
| Refinement on $F^2$             | Primary atom site location:<br>structure-invariant direct methods                   |
| Least-squares matrix: full      | Secondary atom site location:<br>difference Fourier map                             |
| $R[F^2 > 2\sigma(F^2)] = 0.040$ | Hydrogen site location: inferred<br>from neighbouring sites                         |
| $wR(F^2) = 0.111$               | H atoms treated by a mixture of<br>independent and constrained<br>refinement        |
| $S = 1.03$                      | $w = 1/[\sigma^2(F_o^2) + (0.0547P)^2 + 0.2906P]$<br>where $P = (F_o^2 + 2F_c^2)/3$ |
| 4119 reflections                | $(\Delta/\sigma)_{\max} = 0.004$                                                    |
| 311 parameters                  | $\Delta\rho_{\max} = 0.19 \text{ e } \text{\AA}^{-3}$                               |
| 0 restraints                    | $\Delta\rho_{\min} = -0.21 \text{ e } \text{\AA}^{-3}$                              |

## Special details

### Refinement

Refinement of  $F^2$  against ALL reflections. The weighted  $R$ -factor  $wR$  and goodness of fit  $S$  are based on  $F^2$ , conventional  $R$ -factors  $R$  are based on  $F$ , with  $F$  set to zero for negative  $F^2$ . The threshold expression of  $F^2 > \sigma(F^2)$  is used only for calculating  $R$ -factors(gt) *etc.* and is not relevant to the choice of reflections for refinement.  $R$ -factors based on  $F^2$  are statistically about twice as large as those based on  $F$ , and  $R$ -factors based on ALL data will be even larger.

Fractional atomic coordinates and isotropic or equivalent isotropic displacement parameters ( $\text{\AA}^2$ )

|    | X            | Y            | Z            | $U_{\text{iso}}^*/U_{\text{eq}}$ |
|----|--------------|--------------|--------------|----------------------------------|
| C1 | 1.04016 (19) | 0.52685 (14) | 0.34053 (9)  | 0.0385 (3)                       |
| C2 | 1.0229 (2)   | 0.63513 (15) | 0.39596 (10) | 0.0478 (4)                       |
| H2 | 0.9373       | 0.6863       | 0.3807       | 0.057*                           |
| C3 | 1.1303 (2)   | 0.66814 (17) | 0.47312 (11) | 0.0550 (4)                       |
| H3 | 1.1160       | 0.7407       | 0.5095       | 0.066*                           |
| C4 | 1.2578 (2)   | 0.59471 (18) | 0.49645 (11) | 0.0587 (5)                       |
| H4 | 1.3297       | 0.6170       | 0.5486       | 0.070*                           |
| C5 | 1.2791 (2)   | 0.48799 (18) | 0.44251 (11) | 0.0550 (4)                       |
| H5 | 1.3667       | 0.4387       | 0.4581       | 0.066*                           |
| C6 | 1.17134 (19) | 0.45323 (14) | 0.36521 (10) | 0.0417 (3)                       |

|      |              |               |               |             |
|------|--------------|---------------|---------------|-------------|
| C7   | 1.1958 (2)   | 0.33854 (15)  | 0.30791 (10)  | 0.0446 (4)  |
| C8   | 1.0303 (2)   | 0.27105 (14)  | 0.24589 (9)   | 0.0397 (3)  |
| C9   | 0.92937 (19) | 0.37508 (14)  | 0.21154 (9)   | 0.0385 (3)  |
| C10  | 0.92853 (19) | 0.49101 (14)  | 0.25739 (9)   | 0.0371 (3)  |
| C11  | 0.8042 (2)   | 0.58099 (14)  | 0.23090 (9)   | 0.0401 (3)  |
| C12  | 0.8649 (2)   | 0.70937 (15)  | 0.20884 (10)  | 0.0479 (4)  |
| H12  | 0.9892       | 0.7416        | 0.2088        | 0.058*      |
| C13  | 0.7446 (3)   | 0.79111 (15)  | 0.18672 (10)  | 0.0521 (4)  |
| H13  | 0.7878       | 0.8768        | 0.1710        | 0.063*      |
| C14  | 0.5606 (2)   | 0.74492 (16)  | 0.18809 (10)  | 0.0509 (4)  |
| C15  | 0.4985 (2)   | 0.61764 (18)  | 0.21056 (12)  | 0.0594 (5)  |
| H15  | 0.3743       | 0.5861        | 0.2118        | 0.071*      |
| C16  | 0.6190 (2)   | 0.53671 (16)  | 0.23124 (11)  | 0.0522 (4)  |
| H16  | 0.5749       | 0.4504        | 0.2458        | 0.063*      |
| C17  | 0.8254 (2)   | 0.33536 (15)  | 0.12560 (10)  | 0.0457 (4)  |
| C18  | 0.7520 (3)   | 0.4012 (2)    | -0.01137 (12) | 0.0833 (7)  |
| H18A | 0.7824       | 0.3208        | -0.0363       | 0.125*      |
| H18B | 0.7902       | 0.4735        | -0.0461       | 0.125*      |
| H18C | 0.6228       | 0.3879        | -0.0088       | 0.125*      |
| C19  | 1.0997 (2)   | 0.19417 (17)  | 0.17186 (11)  | 0.0523 (4)  |
| C20  | 1.2394 (4)   | 0.2216 (3)    | 0.04350 (16)  | 0.1075 (10) |
| H20A | 1.3518       | 0.1943        | 0.0597        | 0.161*      |
| H20B | 1.2588       | 0.2863        | 0.0018        | 0.161*      |
| H20C | 1.1505       | 0.1449        | 0.0190        | 0.161*      |
| C21  | 0.4758 (4)   | 0.9350 (2)    | 0.12847 (14)  | 0.0822 (7)  |
| H21A | 0.5676       | 0.9976        | 0.1647        | 0.123*      |
| H21B | 0.3702       | 0.9736        | 0.1181        | 0.123*      |
| H21C | 0.5219       | 0.9148        | 0.0746        | 0.123*      |
| C22  | 0.9152 (2)   | 0.17131 (13)  | 0.29922 (9)   | 0.0383 (3)  |
| C23  | 0.7324 (2)   | 0.16747 (15)  | 0.30518 (9)   | 0.0435 (4)  |
| H23  | 0.6760       | 0.2297        | 0.2789        | 0.052*      |
| C24  | 0.6325 (2)   | 0.07153 (17)  | 0.35007 (11)  | 0.0536 (4)  |
| H24  | 0.5091       | 0.0698        | 0.3528        | 0.064*      |
| C25  | 0.7110 (3)   | -0.02137 (16) | 0.39079 (11)  | 0.0569 (5)  |
| C26  | 0.8952 (3)   | -0.01318 (16) | 0.38729 (11)  | 0.0575 (5)  |
| H26  | 0.9528       | -0.0724       | 0.4162        | 0.069*      |
| C27  | 0.9956 (2)   | 0.08046 (15)  | 0.34213 (10)  | 0.0494 (4)  |
| H27  | 1.1194       | 0.0828        | 0.3404        | 0.059*      |
| C28  | 0.6003 (4)   | -0.1312 (2)   | 0.43490 (16)  | 0.0927 (8)  |
| H28A | 0.4822       | -0.1116       | 0.4415        | 0.139*      |
| H28B | 0.6608       | -0.1372       | 0.4906        | 0.139*      |

|      |              |              |             |            |
|------|--------------|--------------|-------------|------------|
| H28C | 0.5874       | -0.2150      | 0.4007      | 0.139*     |
| O1   | 1.33429 (15) | 0.29405 (12) | 0.31246 (9) | 0.0629 (3) |
| O2   | 1.0894 (2)   | 0.07656 (13) | 0.16239 (9) | 0.0765 (4) |
| O3   | 1.17487 (19) | 0.28042 (13) | 0.11870 (8) | 0.0680 (4) |
| O4   | 0.7426 (2)   | 0.22389 (12) | 0.10391 (8) | 0.0720 (4) |
| O5   | 0.84266 (17) | 0.43348 (11) | 0.07425 (7) | 0.0588 (3) |
| O6   | 0.42858 (19) | 0.81619 (13) | 0.16963 (9) | 0.0736 (4) |

Atomic displacement parameters ( $\text{\AA}^2$ )

|     | $U^{11}$    | $U^{22}$    | $U^{33}$    | $U^{12}$     | $U^{13}$     | $U^{23}$    |
|-----|-------------|-------------|-------------|--------------|--------------|-------------|
| C1  | 0.0357 (8)  | 0.0370 (7)  | 0.0416 (8)  | 0.0024 (6)   | 0.0060 (6)   | 0.0053 (6)  |
| C2  | 0.0525 (9)  | 0.0418 (8)  | 0.0484 (9)  | 0.0102 (7)   | 0.0033 (7)   | 0.0000 (7)  |
| C3  | 0.0607 (11) | 0.0499 (9)  | 0.0493 (9)  | 0.0035 (8)   | 0.0019 (8)   | -0.0061 (7) |
| C4  | 0.0537 (10) | 0.0613 (11) | 0.0525 (10) | -0.0007 (8)  | -0.0102 (8)  | -0.0034 (8) |
| C5  | 0.0391 (9)  | 0.0574 (10) | 0.0646 (11) | 0.0051 (7)   | -0.0072 (8)  | 0.0061 (8)  |
| C6  | 0.0318 (8)  | 0.0415 (8)  | 0.0495 (8)  | 0.0014 (6)   | 0.0035 (6)   | 0.0044 (6)  |
| C7  | 0.0355 (8)  | 0.0419 (8)  | 0.0577 (9)  | 0.0070 (7)   | 0.0095 (7)   | 0.0103 (7)  |
| C8  | 0.0398 (8)  | 0.0357 (7)  | 0.0450 (8)  | 0.0086 (6)   | 0.0099 (6)   | 0.0031 (6)  |
| C9  | 0.0377 (8)  | 0.0368 (7)  | 0.0407 (7)  | 0.0038 (6)   | 0.0075 (6)   | 0.0057 (6)  |
| C10 | 0.0359 (8)  | 0.0346 (7)  | 0.0404 (7)  | 0.0035 (6)   | 0.0073 (6)   | 0.0064 (6)  |
| C11 | 0.0462 (9)  | 0.0358 (7)  | 0.0380 (7)  | 0.0076 (6)   | 0.0027 (6)   | 0.0035 (6)  |
| C12 | 0.0503 (9)  | 0.0400 (8)  | 0.0504 (9)  | 0.0023 (7)   | 0.0011 (7)   | 0.0060 (7)  |
| C13 | 0.0724 (12) | 0.0339 (8)  | 0.0481 (9)  | 0.0083 (8)   | -0.0030 (8)  | 0.0071 (7)  |
| C14 | 0.0622 (11) | 0.0471 (9)  | 0.0459 (8)  | 0.0219 (8)   | -0.0059 (7)  | 0.0024 (7)  |
| C15 | 0.0471 (10) | 0.0586 (11) | 0.0754 (12) | 0.0143 (8)   | 0.0035 (8)   | 0.0188 (9)  |
| C16 | 0.0472 (10) | 0.0434 (9)  | 0.0674 (10) | 0.0084 (7)   | 0.0058 (8)   | 0.0178 (8)  |
| C17 | 0.0515 (9)  | 0.0404 (8)  | 0.0432 (8)  | 0.0041 (7)   | 0.0068 (7)   | 0.0026 (7)  |
| C18 | 0.1029 (17) | 0.0871 (15) | 0.0472 (10) | -0.0074 (13) | -0.0152 (10) | 0.0165 (10) |
| C19 | 0.0560 (10) | 0.0487 (10) | 0.0569 (10) | 0.0157 (8)   | 0.0199 (8)   | 0.0045 (8)  |
| C20 | 0.153 (3)   | 0.1032 (18) | 0.0904 (17) | 0.0530 (18)  | 0.0810 (18)  | 0.0205 (14) |
| C21 | 0.1208 (19) | 0.0549 (11) | 0.0772 (14) | 0.0400 (12)  | -0.0099 (13) | 0.0101 (10) |
| C22 | 0.0435 (8)  | 0.0317 (7)  | 0.0391 (7)  | 0.0057 (6)   | 0.0063 (6)   | 0.0000 (6)  |
| C23 | 0.0445 (9)  | 0.0430 (8)  | 0.0434 (8)  | 0.0083 (7)   | 0.0073 (6)   | 0.0042 (6)  |
| C24 | 0.0519 (10) | 0.0529 (10) | 0.0541 (9)  | 0.0010 (8)   | 0.0181 (8)   | 0.0030 (8)  |
| C25 | 0.0831 (13) | 0.0392 (9)  | 0.0477 (9)  | 0.0033 (8)   | 0.0232 (9)   | 0.0035 (7)  |
| C26 | 0.0863 (14) | 0.0385 (8)  | 0.0514 (9)  | 0.0189 (9)   | 0.0104 (9)   | 0.0084 (7)  |
| C27 | 0.0538 (10) | 0.0401 (8)  | 0.0563 (9)  | 0.0140 (7)   | 0.0066 (7)   | 0.0046 (7)  |
| C28 | 0.129 (2)   | 0.0605 (12) | 0.0908 (16) | 0.0013 (13)  | 0.0515 (15)  | 0.0203 (11) |
| O1  | 0.0382 (6)  | 0.0576 (7)  | 0.0956 (9)  | 0.0162 (5)   | 0.0070 (6)   | 0.0054 (6)  |
| O2  | 0.1068 (11) | 0.0500 (8)  | 0.0825 (9)  | 0.0275 (7)   | 0.0436 (8)   | 0.0008 (6)  |



|    |             |            |            |             |             |            |
|----|-------------|------------|------------|-------------|-------------|------------|
| O3 | 0.0830 (9)  | 0.0626 (8) | 0.0690 (8) | 0.0226 (7)  | 0.0432 (7)  | 0.0144 (6) |
| O4 | 0.0977 (10) | 0.0488 (7) | 0.0551 (7) | -0.0138 (7) | -0.0069 (7) | 0.0012 (6) |
| O5 | 0.0773 (8)  | 0.0510 (7) | 0.0415 (6) | -0.0017 (6) | -0.0036 (5) | 0.0095 (5) |
| O6 | 0.0803 (10) | 0.0613 (8) | 0.0852 (9) | 0.0335 (7)  | -0.0090 (7) | 0.0141 (7) |

Geometric parameters (Å, °)

|           |             |           |             |
|-----------|-------------|-----------|-------------|
| C1—C2     | 1.389 (2)   | C17—O4    | 1.1990 (19) |
| C1—C6     | 1.397 (2)   | C17—O5    | 1.3204 (19) |
| C1—C10    | 1.472 (2)   | C18—O5    | 1.438 (2)   |
| C2—C3     | 1.379 (2)   | C18—H18A  | 0.9600      |
| C2—H2     | 0.9300      | C18—H18B  | 0.9600      |
| C3—C4     | 1.369 (2)   | C18—H18C  | 0.9600      |
| C3—H3     | 0.9300      | C19—O2    | 1.186 (2)   |
| C4—C5     | 1.373 (2)   | C19—O3    | 1.331 (2)   |
| C4—H4     | 0.9300      | C20—O3    | 1.444 (2)   |
| C5—C6     | 1.383 (2)   | C20—H20A  | 0.9600      |
| C5—H5     | 0.9300      | C20—H20B  | 0.9600      |
| C6—C7     | 1.473 (2)   | C20—H20C  | 0.9600      |
| C7—O1     | 1.2134 (18) | C21—O6    | 1.412 (3)   |
| C7—C8     | 1.531 (2)   | C21—H21A  | 0.9600      |
| C8—C9     | 1.522 (2)   | C21—H21B  | 0.9600      |
| C8—C19    | 1.535 (2)   | C21—H21C  | 0.9600      |
| C8—C22    | 1.542 (2)   | C22—C23   | 1.380 (2)   |
| C9—C10    | 1.342 (2)   | C22—C27   | 1.383 (2)   |
| C9—C17    | 1.487 (2)   | C23—C24   | 1.384 (2)   |
| C10—C11   | 1.487 (2)   | C23—H23   | 0.9300      |
| C11—C12   | 1.380 (2)   | C24—C25   | 1.375 (3)   |
| C11—C16   | 1.381 (2)   | C24—H24   | 0.9300      |
| C12—C13   | 1.384 (2)   | C25—C26   | 1.379 (3)   |
| C12—H12   | 0.9300      | C25—C28   | 1.506 (3)   |
| C13—C14   | 1.377 (3)   | C26—C27   | 1.373 (2)   |
| C13—H13   | 0.9300      | C26—H26   | 0.9300      |
| C14—O6    | 1.364 (2)   | C27—H27   | 0.9300      |
| C14—C15   | 1.374 (2)   | C28—H28A  | 0.9600      |
| C15—C16   | 1.374 (2)   | C28—H28B  | 0.9600      |
| C15—H15   | 0.9300      | C28—H28C  | 0.9600      |
| C16—H16   | 0.9300      |           |             |
| C2—C1—C6  | 117.75 (13) | O4—C17—O5 | 123.66 (15) |
| C2—C1—C10 | 122.02 (13) | O4—C17—C9 | 123.29 (14) |
| C6—C1—C10 | 120.21 (13) | O5—C17—C9 | 112.94 (13) |

|             |             |               |             |
|-------------|-------------|---------------|-------------|
| C3—C2—C1    | 121.18 (15) | O5—C18—H18A   | 109.5       |
| C3—C2—H2    | 119.4       | O5—C18—H18B   | 109.5       |
| C1—C2—H2    | 119.4       | H18A—C18—H18B | 109.5       |
| C4—C3—C2    | 120.32 (15) | O5—C18—H18C   | 109.5       |
| C4—C3—H3    | 119.8       | H18A—C18—H18C | 109.5       |
| C2—C3—H3    | 119.8       | H18B—C18—H18C | 109.5       |
| C3—C4—C5    | 119.76 (15) | O2—C19—O3     | 124.44 (15) |
| C3—C4—H4    | 120.1       | O2—C19—C8     | 126.23 (15) |
| C5—C4—H4    | 120.1       | O3—C19—C8     | 109.33 (13) |
| C4—C5—C6    | 120.48 (16) | O3—C20—H20A   | 109.5       |
| C4—C5—H5    | 119.8       | O3—C20—H20B   | 109.5       |
| C6—C5—H5    | 119.8       | H20A—C20—H20B | 109.5       |
| C5—C6—C1    | 120.50 (14) | O3—C20—H20C   | 109.5       |
| C5—C6—C7    | 119.92 (14) | H20A—C20—H20C | 109.5       |
| C1—C6—C7    | 119.58 (13) | H20B—C20—H20C | 109.5       |
| O1—C7—C6    | 122.60 (15) | O6—C21—H21A   | 109.5       |
| O1—C7—C8    | 121.18 (14) | O6—C21—H21B   | 109.5       |
| C6—C7—C8    | 116.07 (12) | H21A—C21—H21B | 109.5       |
| C9—C8—C7    | 110.59 (11) | O6—C21—H21C   | 109.5       |
| C9—C8—C19   | 110.62 (12) | H21A—C21—H21C | 109.5       |
| C7—C8—C19   | 107.56 (12) | H21B—C21—H21C | 109.5       |
| C9—C8—C22   | 113.30 (12) | C23—C22—C27   | 118.00 (14) |
| C7—C8—C22   | 104.74 (11) | C23—C22—C8    | 122.47 (13) |
| C19—C8—C22  | 109.74 (12) | C27—C22—C8    | 119.53 (13) |
| C10—C9—C17  | 122.91 (13) | C22—C23—C24   | 120.40 (15) |
| C10—C9—C8   | 122.15 (13) | C22—C23—H23   | 119.8       |
| C17—C9—C8   | 114.88 (12) | C24—C23—H23   | 119.8       |
| C9—C10—C1   | 120.24 (13) | C25—C24—C23   | 121.70 (16) |
| C9—C10—C11  | 121.87 (13) | C25—C24—H24   | 119.2       |
| C1—C10—C11  | 117.65 (12) | C23—C24—H24   | 119.2       |
| C12—C11—C16 | 117.89 (14) | C24—C25—C26   | 117.36 (15) |
| C12—C11—C10 | 123.18 (14) | C24—C25—C28   | 121.8 (2)   |
| C16—C11—C10 | 118.88 (13) | C26—C25—C28   | 120.81 (19) |
| C11—C12—C13 | 121.32 (15) | C27—C26—C25   | 121.52 (16) |
| C11—C12—H12 | 119.3       | C27—C26—H26   | 119.2       |
| C13—C12—H12 | 119.3       | C25—C26—H26   | 119.2       |
| C14—C13—C12 | 119.67 (15) | C26—C27—C22   | 120.94 (16) |
| C14—C13—H13 | 120.2       | C26—C27—H27   | 119.5       |
| C12—C13—H13 | 120.2       | C22—C27—H27   | 119.5       |
| O6—C14—C15  | 115.00 (16) | C25—C28—H28A  | 109.5       |
| O6—C14—C13  | 125.43 (16) | C25—C28—H28B  | 109.5       |

|                |              |                 |              |
|----------------|--------------|-----------------|--------------|
| C15—C14—C13    | 119.57 (15)  | H28A—C28—H28B   | 109.5        |
| C16—C15—C14    | 120.27 (17)  | C25—C28—H28C    | 109.5        |
| C16—C15—H15    | 119.9        | H28A—C28—H28C   | 109.5        |
| C14—C15—H15    | 119.9        | H28B—C28—H28C   | 109.5        |
| C15—C16—C11    | 121.27 (15)  | C19—O3—C20      | 115.56 (15)  |
| C15—C16—H16    | 119.4        | C17—O5—C18      | 116.25 (13)  |
| C11—C16—H16    | 119.4        | C14—O6—C21      | 118.23 (17)  |
| C6—C1—C2—C3    | -0.6 (2)     | C11—C12—C13—C14 | 1.2 (2)      |
| C10—C1—C2—C3   | -179.19 (14) | C12—C13—C14—O6  | 178.48 (15)  |
| C1—C2—C3—C4    | 0.4 (3)      | C12—C13—C14—C15 | -0.7 (2)     |
| C2—C3—C4—C5    | 0.3 (3)      | O6—C14—C15—C16  | -179.47 (16) |
| C3—C4—C5—C6    | -0.7 (3)     | C13—C14—C15—C16 | -0.2 (3)     |
| C4—C5—C6—C1    | 0.5 (2)      | C14—C15—C16—C11 | 0.7 (3)      |
| C4—C5—C6—C7    | 179.96 (15)  | C12—C11—C16—C15 | -0.2 (2)     |
| C2—C1—C6—C5    | 0.1 (2)      | C10—C11—C16—C15 | 177.47 (15)  |
| C10—C1—C6—C5   | 178.74 (14)  | C10—C9—C17—O4   | -138.46 (18) |
| C2—C1—C6—C7    | -179.29 (13) | C8—C9—C17—O4    | 38.7 (2)     |
| C10—C1—C6—C7   | -0.7 (2)     | C10—C9—C17—O5   | 45.2 (2)     |
| C5—C6—C7—O1    | -20.2 (2)    | C8—C9—C17—O5    | -137.56 (14) |
| C1—C6—C7—O1    | 159.22 (15)  | C9—C8—C19—O2    | -135.20 (19) |
| C5—C6—C7—C8    | 155.47 (14)  | C7—C8—C19—O2    | 103.9 (2)    |
| C1—C6—C7—C8    | -25.1 (2)    | C22—C8—C19—O2   | -9.5 (2)     |
| O1—C7—C8—C9    | -146.10 (15) | C9—C8—C19—O3    | 44.87 (18)   |
| C6—C7—C8—C9    | 38.16 (17)   | C7—C8—C19—O3    | -76.01 (17)  |
| O1—C7—C8—C19   | -25.2 (2)    | C22—C8—C19—O3   | 170.60 (13)  |
| C6—C7—C8—C19   | 159.05 (13)  | C9—C8—C22—C23   | 7.84 (19)    |
| O1—C7—C8—C22   | 91.51 (17)   | C7—C8—C22—C23   | 128.45 (14)  |
| C6—C7—C8—C22   | -84.24 (15)  | C19—C8—C22—C23  | -116.35 (15) |
| C7—C8—C9—C10   | -29.46 (18)  | C9—C8—C22—C27   | -173.06 (12) |
| C19—C8—C9—C10  | -148.52 (14) | C7—C8—C22—C27   | -52.45 (16)  |
| C22—C8—C9—C10  | 87.78 (16)   | C19—C8—C22—C27  | 62.75 (17)   |
| C7—C8—C9—C17   | 153.32 (12)  | C27—C22—C23—C24 | -2.6 (2)     |
| C19—C8—C9—C17  | 34.26 (17)   | C8—C22—C23—C24  | 176.56 (13)  |
| C22—C8—C9—C17  | -89.44 (14)  | C22—C23—C24—C25 | 0.8 (2)      |
| C17—C9—C10—C1  | -177.56 (13) | C23—C24—C25—C26 | 1.7 (2)      |
| C8—C9—C10—C1   | 5.4 (2)      | C23—C24—C25—C28 | -176.07 (17) |
| C17—C9—C10—C11 | 8.2 (2)      | C24—C25—C26—C27 | -2.5 (2)     |
| C8—C9—C10—C11  | -168.83 (13) | C28—C25—C26—C27 | 175.31 (17)  |
| C2—C1—C10—C9   | -170.09 (14) | C25—C26—C27—C22 | 0.8 (2)      |
| C6—C1—C10—C9   | 11.4 (2)     | C23—C22—C27—C26 | 1.8 (2)      |
| C2—C1—C10—C11  | 4.4 (2)      | C8—C22—C27—C26  | -177.35 (14) |

|                 |              |                |              |
|-----------------|--------------|----------------|--------------|
| C6—C1—C10—C11   | -174.13 (12) | O2—C19—O3—C20  | 2.7 (3)      |
| C9—C10—C11—C12  | -117.13 (17) | C8—C19—O3—C20  | -177.38 (18) |
| C1—C10—C11—C12  | 68.45 (18)   | O4—C17—O5—C18  | 1.3 (3)      |
| C9—C10—C11—C16  | 65.36 (19)   | C9—C17—O5—C18  | 177.56 (16)  |
| C1—C10—C11—C16  | -109.06 (16) | C15—C14—O6—C21 | -166.54 (17) |
| C16—C11—C12—C13 | -0.7 (2)     | C13—C14—O6—C21 | 14.3 (2)     |
| C10—C11—C12—C13 | -178.28 (14) |                |              |

Crystallographic data of  $\beta$ -keto-ester **9d**:

CCDC Number is **1450132**.

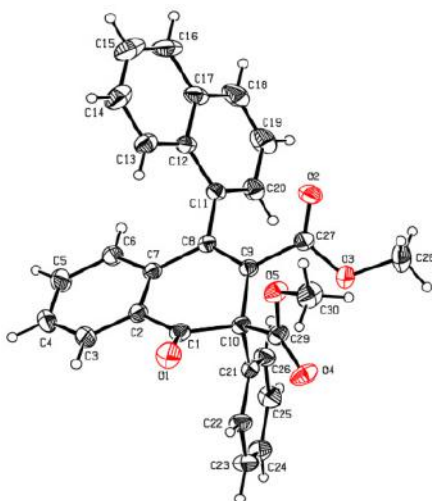

## Computing details

Program(s) used to solve structure: *SHELXS97* (Sheldrick, 1990);  
program(s) used to refine structure: *SHELXL97* (Sheldrick, 1997).

**Dimethyl-4-oxo-3-phenyl-3,4-dihydro-1,1'-binaphthyl-2,3-dicarboxylate (9d)**

# Experimental

## Crystal data

$C_{30}H_{22}O_5$

$M_r = 462.48$

Monoclinic,  $P2_1/c$

Hall symbol:  $-P 2_1/c$

$a = 16.2811 (9) \text{ \AA}$

$b = 10.0247 (5) \text{ \AA}$

$F(000) = 968$

$D_x = 1.308 \text{ Mg m}^{-3}$

Mo  $K\alpha$  radiation,  $\lambda = 0.71073 \text{ \AA}$

Cell parameters  
from 4122 reflections

$\theta = 2.5\text{--}25.0^\circ$

$\mu = 0.09 \text{ mm}^{-1}$



$c = 15.5040$  (9) Å  
 $\beta = 111.902$  (2)°  
 $V = 2347.8$  (2) Å<sup>3</sup>  
 $Z = 4$

$T = 296$  K  
 Block, colourless  
 $0.30 \times 0.25 \times 0.25$  mm

### Data collection

Kappa ApexII CCD Diffractometer 4122 independent reflections  
 Radiation source: fine-focus sealed tube 3262 reflections with  $I > 2\sigma(I)$   
 Graphite monochromator  $R_{int} = 0.042$   
 $\omega$  &  $\varphi$  scans  $\theta_{min} = 25.0^\circ$ ,  $\theta_{max} = 2.5^\circ$   
 Absorption correction: multi-scan SADABS (Bruker, 2008)  $h = -19 \rightarrow 19$   
 $T_{min} = 0.974$ ,  $T_{max} = 0.978$   $k = -11 \rightarrow 11$   
 25692 measured reflections  $l = -18 \rightarrow 18$

### Refinement

Refinement on  $F_o^2$  Primary atom site  
 location: structure-invariant direct methods  
 Least-squares matrix: full Secondary atom site  
 location: difference Fourier map  
 $R[F_o^2 > 2\sigma(F_o^2)] = 0.039$  Hydrogen site location: inferred  
 from neighbouring sites  
 $wR(F_o^2) = 0.119$  H-atom parameters constrained  
 $w = 1/[\sigma(F_o^2) + (0.0706P)] + 0.317P]$   
 $S = 1.04$  where  $P = (F_o^2 + 2F_c^2)/3$   
 4122 reflections  $(\Delta/\sigma)_{int} = 0.002$   
 318 parameters  $\Delta\rho_{max} = 0.22$  e Å<sup>-3</sup>  
 0 restraints  $\Delta\rho_{min} = -0.15$  e Å<sup>-3</sup>

### Special details

#### Refinement

Refinement of  $F_o^2$  against ALL reflections. The weighted  $R$ -factor  $wR$  and goodness of fit  $S$  are based on  $F_o^2$ , conventional  $R$ -factors  $R$  are based on  $F$ , with  $F$  set to zero for negative  $F_o^2$ . The threshold expression of  $F_o^2 > \sigma(F_o^2)$  is used only for calculating  $R$ -factors(gt) etc. and is not relevant to the choice of reflections for refinement.  $R$ -factors based on  $F_o^2$  are statistically about twice as large as those based on  $F$ , and  $R$ -factors based on ALL data will be even larger.

### Fractional atomic coordinates and isotropic or equivalent isotropic displacement parameters (Å<sup>2</sup>)

|           | $x$          | $Y$          | $z$           | $U_{eq}^*/U_{eq}$ |
|-----------|--------------|--------------|---------------|-------------------|
| <b>C1</b> | 0.16810 (10) | 0.79300 (15) | 0.08703 (10)  | 0.0381 (4)        |
| <b>C2</b> | 0.15819 (10) | 0.64702 (14) | 0.07613 (10)  | 0.0364 (3)        |
| <b>C3</b> | 0.10938 (11) | 0.59202 (17) | -0.00964 (11) | 0.0481 (4)        |

|      |               |              |               |            |
|------|---------------|--------------|---------------|------------|
| H3   | 0.0855        | 0.6469       | -0.0614       | 0.058*     |
| C4   | 0.09604 (13)  | 0.45625 (18) | -0.01856 (12) | 0.0551 (5) |
| H4   | 0.0629        | 0.4193       | -0.0761       | 0.066*     |
| C5   | 0.13226 (12)  | 0.37531 (17) | 0.05851 (12)  | 0.0518 (4) |
| H5   | 0.1224        | 0.2838       | 0.0529        | 0.062*     |
| C6   | 0.18295 (11)  | 0.42900 (15) | 0.14373 (11)  | 0.0409 (4) |
| H6   | 0.2079        | 0.3730       | 0.1947        | 0.049*     |
| C7   | 0.19714 (9)   | 0.56571 (14) | 0.15443 (10)  | 0.0329 (3) |
| C8   | 0.25385 (9)   | 0.62674 (13) | 0.24366 (9)   | 0.0314 (3) |
| C9   | 0.24868 (9)   | 0.75887 (14) | 0.25757 (10)  | 0.0325 (3) |
| C10  | 0.17985 (9)   | 0.84532 (14) | 0.18459 (10)  | 0.0342 (3) |
| C11  | 0.31149 (10)  | 0.53719 (14) | 0.31924 (10)  | 0.0351 (3) |
| C12  | 0.38377 (10)  | 0.46701 (14) | 0.30968 (11)  | 0.0385 (4) |
| C13  | 0.40609 (11)  | 0.47718 (16) | 0.23040 (13)  | 0.0474 (4) |
| H13  | 0.3725        | 0.5317       | 0.1814        | 0.057*     |
| C14  | 0.47591 (13)  | 0.40870 (19) | 0.22422 (17)  | 0.0665 (6) |
| H14  | 0.4887        | 0.4152       | 0.1707        | 0.080*     |
| C15  | 0.52846 (14)  | 0.3286 (2)   | 0.2979 (2)    | 0.0784 (7) |
| H15  | 0.5764        | 0.2830       | 0.2934        | 0.094*     |
| C16  | 0.51020 (13)  | 0.31711 (19) | 0.37514 (19)  | 0.0726 (7) |
| H16  | 0.5461        | 0.2639       | 0.4237        | 0.087*     |
| C17  | 0.43703 (11)  | 0.38464 (16) | 0.38425 (13)  | 0.0513 (4) |
| C18  | 0.41625 (14)  | 0.37321 (19) | 0.46430 (14)  | 0.0659 (6) |
| H18  | 0.4509        | 0.3193       | 0.5132        | 0.079*     |
| C19  | 0.34646 (15)  | 0.4397 (2)   | 0.47101 (13)  | 0.0636 (5) |
| H19  | 0.3333        | 0.4307       | 0.5242        | 0.076*     |
| C20  | 0.29386 (12)  | 0.52230 (16) | 0.39806 (11)  | 0.0459 (4) |
| H20  | 0.2462        | 0.5675       | 0.4036        | 0.055*     |
| C21  | 0.08688 (9)   | 0.83404 (14) | 0.18891 (10)  | 0.0349 (3) |
| C22  | 0.01590 (11)  | 0.89851 (16) | 0.12212 (12)  | 0.0467 (4) |
| H22  | 0.0255        | 0.9502       | 0.0770        | 0.056*     |
| C23  | -0.06846 (11) | 0.88684 (18) | 0.12188 (13)  | 0.0535 (4) |
| H23  | -0.1151       | 0.9318       | 0.0773        | 0.064*     |
| C24  | -0.08400 (11) | 0.80933 (19) | 0.18702 (12)  | 0.0530 (4) |
| H24  | -0.1411       | 0.8008       | 0.1864        | 0.064*     |
| C25  | -0.01457 (11) | 0.74406 (18) | 0.25348 (12)  | 0.0505 (4) |
| H25  | -0.0248       | 0.6914       | 0.2978        | 0.061*     |
| C26  | 0.07010 (10)  | 0.75662 (16) | 0.25435 (10)  | 0.0412 (4) |
| H26  | 0.1166        | 0.7124       | 0.2996        | 0.049*     |
| C27  | 0.30751 (11)  | 0.82461 (15) | 0.34507 (10)  | 0.0385 (4) |
| C28  | 0.31288 (16)  | 0.9993 (2)   | 0.44990 (16)  | 0.0809 (7) |
| H28A | 0.3620        | 1.0386       | 0.4391        | 0.121*     |
| H28B | 0.3345        | 0.9448       | 0.5047        | 0.121*     |

|      |              |              |              |            |
|------|--------------|--------------|--------------|------------|
| H28C | 0.2758       | 1.0685       | 0.4583       | 0.121*     |
| C29  | 0.21036 (11) | 0.99078 (15) | 0.18912 (11) | 0.0402 (4) |
| C30  | 0.33376 (13) | 1.12616 (17) | 0.20682 (16) | 0.0634 (5) |
| H30A | 0.3000       | 1.1772       | 0.1528       | 0.095*     |
| H30B | 0.3938       | 1.1185       | 0.2106       | 0.095*     |
| H30C | 0.3328       | 1.1701       | 0.2615       | 0.095*     |
| O1   | 0.16230 (10) | 0.86806 (12) | 0.02391 (8)  | 0.0600 (4) |
| O2   | 0.38451 (8)  | 0.80178 (12) | 0.38594 (8)  | 0.0537 (3) |
| O3   | 0.26227 (8)  | 0.91803 (12) | 0.37103 (8)  | 0.0529 (3) |
| O4   | 0.16556 (8)  | 1.08759 (11) | 0.18169 (10) | 0.0598 (4) |
| O5   | 0.29551 (7)  | 0.99458 (10) | 0.20016 (8)  | 0.0473 (3) |

*Atomic displacement parameters ( $\text{\AA}^2$ )*

|     | $U_{11}$    | $U_{22}$    | $U_{33}$    | $U_{12}$     | $U_{13}$     | $U_{23}$     |
|-----|-------------|-------------|-------------|--------------|--------------|--------------|
| C1  | 0.0417 (9)  | 0.0377 (8)  | 0.0356 (8)  | 0.0073 (7)   | 0.0153 (7)   | 0.0078 (7)   |
| C2  | 0.0399 (8)  | 0.0359 (8)  | 0.0343 (8)  | 0.0049 (6)   | 0.0150 (7)   | 0.0018 (6)   |
| C3  | 0.0555 (10) | 0.0518 (10) | 0.0328 (8)  | 0.0083 (8)   | 0.0118 (8)   | 0.0031 (7)   |
| C4  | 0.0598 (11) | 0.0539 (10) | 0.0411 (10) | -0.0014 (9)  | 0.0067 (8)   | -0.0127 (8)  |
| C5  | 0.0575 (11) | 0.0372 (9)  | 0.0530 (10) | -0.0052 (8)  | 0.0115 (9)   | -0.0079 (8)  |
| C6  | 0.0449 (9)  | 0.0340 (8)  | 0.0417 (9)  | 0.0027 (7)   | 0.0136 (7)   | 0.0023 (7)   |
| C7  | 0.0337 (8)  | 0.0323 (7)  | 0.0331 (8)  | 0.0044 (6)   | 0.0129 (6)   | 0.0016 (6)   |
| C8  | 0.0311 (7)  | 0.0316 (7)  | 0.0329 (7)  | 0.0031 (6)   | 0.0136 (6)   | 0.0037 (6)   |
| C9  | 0.0326 (8)  | 0.0327 (7)  | 0.0332 (8)  | 0.0023 (6)   | 0.0133 (6)   | 0.0031 (6)   |
| C10 | 0.0371 (8)  | 0.0284 (7)  | 0.0372 (8)  | 0.0049 (6)   | 0.0140 (7)   | 0.0040 (6)   |
| C11 | 0.0357 (8)  | 0.0286 (7)  | 0.0364 (8)  | -0.0007 (6)  | 0.0082 (6)   | 0.0024 (6)   |
| C12 | 0.0327 (8)  | 0.0261 (7)  | 0.0479 (9)  | -0.0012 (6)  | 0.0050 (7)   | -0.0009 (6)  |
| C13 | 0.0415 (9)  | 0.0391 (9)  | 0.0622 (11) | 0.0002 (7)   | 0.0201 (8)   | -0.0015 (8)  |
| C14 | 0.0533 (11) | 0.0512 (11) | 0.1047 (17) | -0.0016 (9)  | 0.0408 (12)  | -0.0132 (11) |
| C15 | 0.0455 (12) | 0.0478 (12) | 0.139 (2)   | 0.0058 (9)   | 0.0312 (14)  | -0.0103 (13) |
| C16 | 0.0403 (11) | 0.0400 (10) | 0.1085 (18) | 0.0096 (8)   | -0.0057 (11) | 0.0046 (11)  |
| C17 | 0.0406 (9)  | 0.0313 (8)  | 0.0611 (11) | -0.0005 (7)  | -0.0053 (8)  | 0.0022 (8)   |
| C18 | 0.0685 (13) | 0.0484 (11) | 0.0542 (12) | 0.0012 (10)  | -0.0077 (10) | 0.0175 (9)   |
| C19 | 0.0792 (14) | 0.0620 (12) | 0.0410 (10) | -0.0064 (11) | 0.0125 (9)   | 0.0145 (9)   |
| C20 | 0.0527 (10) | 0.0454 (9)  | 0.0375 (9)  | -0.0008 (8)  | 0.0144 (8)   | 0.0053 (7)   |
| C21 | 0.0377 (8)  | 0.0307 (7)  | 0.0349 (8)  | 0.0035 (6)   | 0.0120 (6)   | -0.0024 (6)  |
| C22 | 0.0470 (10) | 0.0438 (9)  | 0.0464 (9)  | 0.0113 (7)   | 0.0142 (8)   | 0.0118 (7)   |
| C23 | 0.0401 (9)  | 0.0548 (10) | 0.0578 (11) | 0.0141 (8)   | 0.0093 (8)   | 0.0059 (9)   |
| C24 | 0.0371 (9)  | 0.0634 (11) | 0.0585 (11) | 0.0023 (8)   | 0.0179 (8)   | -0.0074 (9)  |
| C25 | 0.0468 (10) | 0.0625 (11) | 0.0457 (10) | -0.0034 (8)  | 0.0215 (8)   | 0.0029 (8)   |
| C26 | 0.0387 (9)  | 0.0479 (9)  | 0.0351 (8)  | 0.0044 (7)   | 0.0116 (7)   | 0.0052 (7)   |
| C27 | 0.0418 (9)  | 0.0338 (8)  | 0.0395 (8)  | 0.0000 (7)   | 0.0146 (7)   | 0.0019 (6)   |
| C28 | 0.0880 (16) | 0.0793 (15) | 0.0690 (14) | -0.0087 (12) | 0.0218 (12)  | -0.0405 (12) |
| C29 | 0.0465 (9)  | 0.0314 (8)  | 0.0451 (9)  | 0.0049 (7)   | 0.0199 (7)   | 0.0042 (7)   |

|            |             |            |             |             |             |             |
|------------|-------------|------------|-------------|-------------|-------------|-------------|
| <b>C30</b> | 0.0635 (12) | 0.0386 (9) | 0.0891 (15) | -0.0128 (9) | 0.0297 (11) | -0.0049 (9) |
| <b>O1</b>  | 0.0932 (10) | 0.0454 (7) | 0.0457 (7)  | 0.0076 (6)  | 0.0308 (7)  | 0.0164 (6)  |
| <b>O2</b>  | 0.0407 (7)  | 0.0526 (7) | 0.0544 (7)  | 0.0012 (5)  | 0.0025 (6)  | -0.0041 (6) |
| <b>O3</b>  | 0.0536 (7)  | 0.0518 (7) | 0.0510 (7)  | 0.0005 (5)  | 0.0168 (6)  | -0.0182 (6) |
| <b>O4</b>  | 0.0595 (8)  | 0.0306 (6) | 0.0944 (10) | 0.0112 (5)  | 0.0346 (7)  | 0.0078 (6)  |
| <b>O5</b>  | 0.0446 (7)  | 0.0303 (5) | 0.0693 (8)  | -0.0018 (5) | 0.0241 (6)  | 0.0022 (5)  |

*Geometric parameters (Å, °)*

|           |             |             |             |
|-----------|-------------|-------------|-------------|
| C1—O1     | 1.2100 (17) | C16—H16     | 0.9300      |
| C1—C2     | 1.475 (2)   | C17—C18     | 1.408 (3)   |
| C1—C10    | 1.544 (2)   | C18—C19     | 1.355 (3)   |
| C2—C3     | 1.384 (2)   | C18—H18     | 0.9300      |
| C2—C7     | 1.402 (2)   | C19—C20     | 1.405 (3)   |
| C3—C4     | 1.377 (2)   | C19—H19     | 0.9300      |
| C3—H3     | 0.9300      | C20—H20     | 0.9300      |
| C4—C5     | 1.381 (2)   | C21—C26     | 1.383 (2)   |
| C4—H4     | 0.9300      | C21—C22     | 1.390 (2)   |
| C5—C6     | 1.379 (2)   | C22—C23     | 1.377 (2)   |
| C5—H5     | 0.9300      | C22—H22     | 0.9300      |
| C6—C7     | 1.389 (2)   | C23—C24     | 1.370 (3)   |
| C6—H6     | 0.9300      | C23—H23     | 0.9300      |
| C7—C8     | 1.479 (2)   | C24—C25     | 1.378 (2)   |
| C8—C9     | 1.3496 (19) | C24—H24     | 0.9300      |
| C8—C11    | 1.4964 (19) | C25—C26     | 1.379 (2)   |
| C9—C27    | 1.491 (2)   | C25—H25     | 0.9300      |
| C9—C10    | 1.5301 (19) | C26—H26     | 0.9300      |
| C10—C29   | 1.534 (2)   | C27—O2      | 1.1970 (18) |
| C10—C21   | 1.544 (2)   | C27—O3      | 1.3427 (19) |
| C11—C20   | 1.364 (2)   | C28—O3      | 1.444 (2)   |
| C11—C12   | 1.425 (2)   | C28—H28A    | 0.9600      |
| C12—C13   | 1.409 (2)   | C28—H28B    | 0.9600      |
| C12—C17   | 1.422 (2)   | C28—H28C    | 0.9600      |
| C13—C14   | 1.362 (2)   | C29—O4      | 1.1934 (18) |
| C13—H13   | 0.9300      | C29—O5      | 1.3325 (19) |
| C14—C15   | 1.397 (3)   | C30—O5      | 1.4458 (19) |
| C14—H14   | 0.9300      | C30—H30A    | 0.9600      |
| C15—C16   | 1.342 (3)   | C30—H30B    | 0.9600      |
| C15—H15   | 0.9300      | C30—H30C    | 0.9600      |
| C16—C17   | 1.422 (3)   |             |             |
| O1—C1—C2  | 123.51 (14) | C18—C17—C12 | 119.33 (16) |
| O1—C1—C10 | 121.66 (14) | C18—C17—C16 | 122.32 (18) |
| C2—C1—C10 | 114.68 (12) | C12—C17—C16 | 118.35 (19) |
| C3—C2—C7  | 120.83 (14) | C19—C18—C17 | 120.80 (17) |



|             |             |               |             |
|-------------|-------------|---------------|-------------|
| C3—C2—C1    | 120.29 (14) | C19—C18—H18   | 119.6       |
| C7—C2—C1    | 118.87 (13) | C17—C18—H18   | 119.6       |
| C4—C3—C2    | 120.18 (15) | C18—C19—C20   | 120.33 (18) |
| C4—C3—H3    | 119.9       | C18—C19—H19   | 119.8       |
| C2—C3—H3    | 119.9       | C20—C19—H19   | 119.8       |
| C3—C4—C5    | 119.56 (16) | C11—C20—C19   | 121.12 (17) |
| C3—C4—H4    | 120.2       | C11—C20—H20   | 119.4       |
| C5—C4—H4    | 120.2       | C19—C20—H20   | 119.4       |
| C6—C5—C4    | 120.60 (15) | C26—C21—C22   | 118.07 (14) |
| C6—C5—H5    | 119.7       | C26—C21—C10   | 122.55 (13) |
| C4—C5—H5    | 119.7       | C22—C21—C10   | 119.31 (13) |
| C5—C6—C7    | 120.85 (14) | C23—C22—C21   | 120.91 (15) |
| C5—C6—H6    | 119.6       | C23—C22—H22   | 119.5       |
| C7—C6—H6    | 119.6       | C21—C22—H22   | 119.5       |
| C6—C7—C2    | 117.95 (13) | C24—C23—C22   | 120.28 (16) |
| C6—C7—C8    | 122.53 (13) | C24—C23—H23   | 119.9       |
| C2—C7—C8    | 119.49 (13) | C22—C23—H23   | 119.9       |
| C9—C8—C7    | 120.07 (13) | C23—C24—C25   | 119.66 (16) |
| C9—C8—C11   | 121.46 (13) | C23—C24—H24   | 120.2       |
| C7—C8—C11   | 118.33 (12) | C25—C24—H24   | 120.2       |
| C8—C9—C27   | 121.47 (13) | C24—C25—C26   | 120.14 (16) |
| C8—C9—C10   | 120.65 (13) | C24—C25—H25   | 119.9       |
| C27—C9—C10  | 117.85 (12) | C26—C25—H25   | 119.9       |
| C9—C10—C29  | 111.68 (12) | C25—C26—C21   | 120.94 (15) |
| C9—C10—C1   | 108.73 (11) | C25—C26—H26   | 119.5       |
| C29—C10—C1  | 106.71 (11) | C21—C26—H26   | 119.5       |
| C9—C10—C21  | 112.69 (11) | O2—C27—O3     | 123.92 (14) |
| C29—C10—C21 | 111.94 (11) | O2—C27—C9     | 125.99 (14) |
| C1—C10—C21  | 104.62 (11) | O3—C27—C9     | 110.06 (13) |
| C20—C11—C12 | 119.80 (14) | O3—C28—H28A   | 109.5       |
| C20—C11—C8  | 119.15 (13) | O3—C28—H28B   | 109.5       |
| C12—C11—C8  | 121.04 (13) | H28A—C28—H28B | 109.5       |
| C13—C12—C17 | 118.27 (15) | O3—C28—H28C   | 109.5       |
| C13—C12—C11 | 123.11 (14) | H28A—C28—H28C | 109.5       |
| C17—C12—C11 | 118.60 (15) | H28B—C28—H28C | 109.5       |
| C14—C13—C12 | 121.23 (18) | O4—C29—O5     | 123.93 (14) |
| C14—C13—H13 | 119.4       | O4—C29—C10    | 126.37 (14) |
| C12—C13—H13 | 119.4       | O5—C29—C10    | 109.68 (12) |
| C13—C14—C15 | 120.3 (2)   | O5—C30—H30A   | 109.5       |
| C13—C14—H14 | 119.8       | O5—C30—H30B   | 109.5       |
| C15—C14—H14 | 119.8       | H30A—C30—H30B | 109.5       |
| C16—C15—C14 | 120.47 (19) | O5—C30—H30C   | 109.5       |
| C16—C15—H15 | 119.8       | H30A—C30—H30C | 109.5       |

|                |              |                 |              |
|----------------|--------------|-----------------|--------------|
| C14—C15—H15    | 119.8        | H30B—C30—H30C   | 109.5        |
| C15—C16—C17    | 121.34 (19)  | C27—O3—C28      | 116.34 (14)  |
| C15—C16—H16    | 119.3        | C29—O5—C30      | 115.79 (13)  |
| C17—C16—H16    | 119.3        |                 |              |
| O1—C1—C2—C3    | -25.2 (2)    | C11—C12—C13—C14 | 179.78 (15)  |
| C10—C1—C2—C3   | 150.51 (14)  | C12—C13—C14—C15 | -1.5 (3)     |
| O1—C1—C2—C7    | 156.37 (15)  | C13—C14—C15—C16 | 0.7 (3)      |
| C10—C1—C2—C7   | -27.94 (19)  | C14—C15—C16—C17 | 0.4 (3)      |
| C7—C2—C3—C4    | 2.1 (2)      | C13—C12—C17—C18 | 179.80 (15)  |
| C1—C2—C3—C4    | -176.34 (15) | C11—C12—C17—C18 | 0.9 (2)      |
| C2—C3—C4—C5    | -0.5 (3)     | C13—C12—C17—C16 | 0.2 (2)      |
| C3—C4—C5—C6    | -1.2 (3)     | C11—C12—C17—C16 | -178.67 (15) |
| C4—C5—C6—C7    | 1.4 (3)      | C15—C16—C17—C18 | 179.51 (19)  |
| C5—C6—C7—C2    | 0.2 (2)      | C15—C16—C17—C12 | -0.9 (3)     |
| C5—C6—C7—C8    | -177.57 (14) | C12—C17—C18—C19 | -0.1 (3)     |
| C3—C2—C7—C6    | -1.9 (2)     | C16—C17—C18—C19 | 179.48 (18)  |
| C1—C2—C7—C6    | 176.53 (13)  | C17—C18—C19—C20 | -0.4 (3)     |
| C3—C2—C7—C8    | 175.92 (13)  | C12—C11—C20—C19 | 0.7 (2)      |
| C1—C2—C7—C8    | -5.6 (2)     | C8—C11—C20—C19  | -179.70 (15) |
| C6—C7—C8—C9    | -163.65 (14) | C18—C19—C20—C11 | 0.1 (3)      |
| C2—C7—C8—C9    | 18.63 (19)   | C9—C10—C21—C26  | 1.91 (19)    |
| C6—C7—C8—C11   | 12.1 (2)     | C29—C10—C21—C26 | -124.97 (15) |
| C2—C7—C8—C11   | -165.60 (13) | C1—C10—C21—C26  | 119.85 (14)  |
| C7—C8—C9—C27   | -177.39 (12) | C9—C10—C21—C22  | -174.90 (13) |
| C11—C8—C9—C27  | 7.0 (2)      | C29—C10—C21—C22 | 58.23 (18)   |
| C7—C8—C9—C10   | 4.44 (19)    | C1—C10—C21—C22  | -56.95 (16)  |
| C11—C8—C9—C10  | -171.20 (12) | C26—C21—C22—C23 | 0.8 (2)      |
| C8—C9—C10—C29  | -153.22 (13) | C10—C21—C22—C23 | 177.71 (15)  |
| C27—C9—C10—C29 | 28.54 (17)   | C21—C22—C23—C24 | -1.0 (3)     |
| C8—C9—C10—C1   | -35.74 (17)  | C22—C23—C24—C25 | 0.7 (3)      |
| C27—C9—C10—C1  | 146.02 (12)  | C23—C24—C25—C26 | -0.1 (3)     |
| C8—C9—C10—C21  | 79.77 (16)   | C24—C25—C26—C21 | -0.2 (3)     |
| C27—C9—C10—C21 | -98.47 (14)  | C22—C21—C26—C25 | -0.2 (2)     |
| O1—C1—C10—C9   | -137.75 (15) | C10—C21—C26—C25 | -177.01 (14) |
| C2—C1—C10—C9   | 46.48 (16)   | C8—C9—C27—O2    | 40.4 (2)     |
| O1—C1—C10—C29  | -17.15 (19)  | C10—C9—C27—O2   | -141.34 (15) |
| C2—C1—C10—C29  | 167.07 (12)  | C8—C9—C27—O3    | -141.53 (14) |
| O1—C1—C10—C21  | 101.63 (17)  | C10—C9—C27—O3   | 36.70 (17)   |
| C2—C1—C10—C21  | -74.14 (15)  | C9—C10—C29—O4   | -139.09 (17) |
| C9—C8—C11—C20  | 63.14 (19)   | C1—C10—C29—O4   | 102.22 (18)  |
| C7—C8—C11—C20  | -112.57 (15) | C21—C10—C29—O4  | -11.7 (2)    |
| C9—C8—C11—C12  | -117.28 (15) | C9—C10—C29—O5   | 42.71 (16)   |
| C7—C8—C11—C12  | 67.01 (18)   | C1—C10—C29—O5   | -75.98 (15)  |

|                 |             |                |              |
|-----------------|-------------|----------------|--------------|
| C20—C11—C12—C13 | 179.95 (15) | C21—C10—C29—O5 | 170.12 (12)  |
| C8—C11—C12—C13  | 0.4 (2)     | O2—C27—O3—C28  | 3.9 (2)      |
| C20—C11—C12—C17 | -1.2 (2)    | C9—C27—O3—C28  | -174.18 (15) |
| C8—C11—C12—C17  | 179.19 (13) | O4—C29—O5—C30  | 2.5 (2)      |
| C17—C12—C13—C14 | 1.0 (2)     | C10—C29—O5—C30 | -179.22 (14) |

Crystallographic data of  $\beta$ -keto-ester **9g**:

CCDC Number is **1438503**.

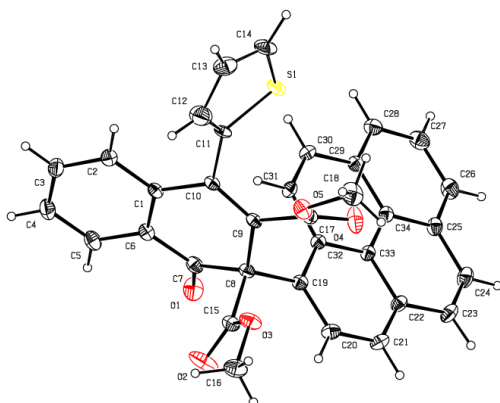

#### Computing details

Program(s) used to solve structure: *SHELXS97* (Sheldrick, 1990); program(s) used to refine structure: *SHELXL97* (Sheldrick, 1997). Computer programs: *SHELXS97* (Sheldrick, 1990), *SHELXL97* (Sheldrick, 1997).

### Dimethyl-1-oxo-4-(pyren-4-yl)-2-(thiophen-2-yl)-1,2-dihydronaphthalene-2,3-dicarboxylate (**9g**)

## Experimental

#### Crystal data

$C_{34}H_{22}O_5S$

$M_r = 542.58$

$a = 10.9268 (10) \text{ \AA}$

$b = 18.9670 (14) \text{ \AA}$

$c = 12.2628 (9) \text{ \AA}$

$\alpha = 90^\circ$

$\beta = 93.030 (2)^\circ$

$\gamma = 90^\circ$

$V = 2537.9 (4) \text{ \AA}^3$

$Z = 4$

$F(000) = 1128$

$D_x = 1.420 \text{ Mg m}^{-3}$

Mo  $K\alpha$  radiation,  $\lambda = 0.71073 \text{ \AA}$

$\mu = 0.17 \text{ mm}^{-1}$

$T = 296 \text{ K}$

$0.25 \times 0.25 \times 0.20 \text{ mm}$

#### Data collection

|                                          |                                                                     |
|------------------------------------------|---------------------------------------------------------------------|
| Radiation source: fine-focus sealed tube | $R_{\text{int}} = 0.031$                                            |
| Graphite monochromator                   | $\theta_{\text{max}} = 25.0^\circ, \theta_{\text{min}} = 2.0^\circ$ |
| 21576 measured reflections               | $h = -12 \rightarrow 12$                                            |
| 4457 independent reflections             | $k = -22 \rightarrow 22$                                            |
| 3341 reflections with $I > 2\sigma(I)$   | $l = -14 \rightarrow 14$                                            |

## Refinement

|                                 |                                                                                     |
|---------------------------------|-------------------------------------------------------------------------------------|
| Refinement on $F^2$             | Primary atom site location:<br>structure-invariant direct methods                   |
| Least-squares matrix: full      | Secondary atom site location:<br>difference Fourier map                             |
| $R[F^2 > 2\sigma(F^2)] = 0.039$ | Hydrogen site location: inferred<br>from neighbouring sites                         |
| $wR(F^2) = 0.102$               | H atoms treated by a mixture of<br>independent and constrained<br>refinement        |
| $S = 1.04$                      | $w = 1/[\sigma^2(F_o^2) + (0.0388P)^2 + 1.1902P]$<br>where $P = (F_o^2 + 2F_c^2)/3$ |
| 4457 reflections                | $(\Delta/\sigma)_{\text{max}} = 0.035$                                              |
| 409 parameters                  | $\Delta\rho_{\text{max}} = 0.22 \text{ e } \text{\AA}^{-3}$                         |
| 147 restraints                  | $\Delta\rho_{\text{min}} = -0.22 \text{ e } \text{\AA}^{-3}$                        |

## Special details

### Refinement

Refinement of  $F^2$  against ALL reflections. The weighted  $R$ -factor  $wR$  and goodness of fit  $S$  are based on  $F^2$ , conventional  $R$ -factors  $R$  are based on  $F$ , with  $F$  set to zero for negative  $F^2$ . The threshold expression of  $F^2 > \sigma(F^2)$  is used only for calculating  $R$ -factors(gt) etc. and is not relevant to the choice of reflections for refinement.  $R$ -factors based on  $F^2$  are statistically about twice as large as those based on  $F$ , and  $R$ -factors based on ALL data will be even larger.

## Fractional atomic coordinates and isotropic or equivalent isotropic displacement parameters ( $\text{\AA}^2$ )

|    | X            | Y            | z            | $U_{\text{iso}}^*/U_{\text{eq}}$ | Occ. (<1) |
|----|--------------|--------------|--------------|----------------------------------|-----------|
| C1 | 0.96828 (18) | 0.11067 (10) | 0.90164 (15) | 0.0320 (4)                       |           |
| C2 | 1.0708 (2)   | 0.11714 (11) | 0.97370 (16) | 0.0415 (5)                       |           |
| H2 | 1.1396       | 0.0895       | 0.9636       | 0.050*                           |           |
| C3 | 1.0716 (2)   | 0.16390 (12) | 1.05966 (17) | 0.0477 (6)                       |           |
| H3 | 1.1399       | 0.1664       | 1.1080       | 0.057*                           |           |



|      |              |               |              |            |
|------|--------------|---------------|--------------|------------|
| C4   | 0.9731 (2)   | 0.20672 (12)  | 1.07487 (17) | 0.0498 (6) |
| H4   | 0.9738       | 0.2374        | 1.1340       | 0.060*     |
| C5   | 0.8731 (2)   | 0.20401 (11)  | 1.00231 (17) | 0.0451 (5) |
| H5   | 0.8077       | 0.2345        | 1.0107       | 0.054*     |
| C6   | 0.86883 (19) | 0.15603 (10)  | 0.91630 (15) | 0.0351 (5) |
| C7   | 0.76264 (19) | 0.15550 (11)  | 0.83793 (16) | 0.0376 (5) |
| C8   | 0.73844 (17) | 0.08695 (10)  | 0.77212 (15) | 0.0321 (4) |
| C9   | 0.85584 (18) | 0.04510 (9)   | 0.75499 (14) | 0.0296 (4) |
| C10  | 0.96161 (18) | 0.05805 (9)   | 0.81266 (14) | 0.0297 (4) |
| C15  | 0.65896 (19) | 0.04476 (11)  | 0.84991 (16) | 0.0392 (5) |
| C16  | 0.6091 (2)   | -0.06628 (13) | 0.9181 (2)   | 0.0595 (7) |
| H16A | 0.6237       | -0.0497       | 0.9916       | 0.089*     |
| H16B | 0.6349       | -0.1145       | 0.9135       | 0.089*     |
| H16C | 0.5232       | -0.0629       | 0.8979       | 0.089*     |
| C17  | 0.84616 (18) | -0.01356 (10) | 0.67263 (16) | 0.0354 (5) |
| C18  | 0.9087 (3)   | -0.12959 (12) | 0.6360 (2)   | 0.0641 (7) |
| H18A | 0.8318       | -0.1402       | 0.5981       | 0.096*     |
| H18B | 0.9387       | -0.1708       | 0.6743       | 0.096*     |
| H18C | 0.9669       | -0.1152       | 0.5843       | 0.096*     |
| C19  | 0.66477 (17) | 0.10326 (10)  | 0.66500 (15) | 0.0320 (4) |
| C20  | 0.55002 (18) | 0.07443 (11)  | 0.64239 (17) | 0.0400 (5) |
| H20  | 0.5160       | 0.0457        | 0.6942       | 0.048*     |
| C21  | 0.48472 (19) | 0.08712 (11)  | 0.54525 (18) | 0.0416 (5) |
| H21  | 0.4085       | 0.0660        | 0.5322       | 0.050*     |
| C22  | 0.53065 (18) | 0.13070 (10)  | 0.46670 (16) | 0.0350 (5) |
| C23  | 0.4643 (2)   | 0.14590 (12)  | 0.36525 (18) | 0.0458 (5) |
| H23  | 0.3898       | 0.1236        | 0.3492       | 0.055*     |
| C24  | 0.5072 (2)   | 0.19114 (12)  | 0.29377 (18) | 0.0471 (6) |
| H24  | 0.4606       | 0.2006        | 0.2298       | 0.057*     |
| C25  | 0.62262 (19) | 0.22575 (10)  | 0.31202 (16) | 0.0383 (5) |
| C26  | 0.6688 (2)   | 0.27433 (12)  | 0.23984 (17) | 0.0494 (6) |
| H26  | 0.6229       | 0.2855        | 0.1762       | 0.059*     |
| C27  | 0.7806 (2)   | 0.30624 (12)  | 0.26021 (18) | 0.0507 (6) |
| H27  | 0.8085       | 0.3390        | 0.2108       | 0.061*     |
| C28  | 0.8517 (2)   | 0.29025 (11)  | 0.35287 (17) | 0.0425 (5) |
| H28  | 0.9279       | 0.3115        | 0.3651       | 0.051*     |
| C29  | 0.80935 (18) | 0.24205 (10)  | 0.42891 (15) | 0.0332 (4) |
| C30  | 0.87809 (18) | 0.22445 (10)  | 0.52708 (16) | 0.0366 (5) |
| H30  | 0.9557       | 0.2438        | 0.5398       | 0.044*     |
| C31  | 0.83406 (18) | 0.18065 (10)  | 0.60193 (16) | 0.0346 (5) |
| H31  | 0.8818       | 0.1712        | 0.6653       | 0.041*     |

|      |              |              |              |             |           |
|------|--------------|--------------|--------------|-------------|-----------|
| C32  | 0.71588 (17) | 0.14808 (9)  | 0.58717 (15) | 0.0301 (4)  |           |
| C33  | 0.64720 (17) | 0.16243 (9)  | 0.48784 (15) | 0.0305 (4)  |           |
| C34  | 0.69379 (17) | 0.20966 (10) | 0.40935 (15) | 0.0314 (4)  |           |
| O1   | 0.69195 (15) | 0.20459 (8)  | 0.82754 (13) | 0.0577 (5)  |           |
| O2   | 0.58943 (18) | 0.07161 (9)  | 0.90895 (16) | 0.0782 (6)  |           |
| O3   | 0.67768 (14) | -0.02357 (7) | 0.84489 (12) | 0.0491 (4)  |           |
| O4   | 0.80019 (18) | -0.00824 (9) | 0.58233 (13) | 0.0650 (5)  |           |
| O5   | 0.89193 (14) | -0.07340 (7) | 0.71283 (11) | 0.0444 (4)  |           |
| S1   | 1.12323 (15) | 0.02883 (10) | 0.65482 (12) | 0.0435 (4)  | 0.691 (3) |
| C11  | 1.0763 (11)  | 0.0203 (8)   | 0.7846 (7)   | 0.033 (2)   | 0.691 (3) |
| C12  | 1.1467 (13)  | -0.0255 (7)  | 0.8443 (10)  | 0.063 (3)   | 0.691 (3) |
| H12  | 1.1326       | -0.0365      | 0.9164       | 0.076*      | 0.691 (3) |
| C13  | 1.2445 (14)  | -0.0553 (8)  | 0.7873 (9)   | 0.0561 (18) | 0.691 (3) |
| H13  | 1.3016       | -0.0877      | 0.8158       | 0.067*      | 0.691 (3) |
| C14  | 1.2407 (10)  | -0.0290 (6)  | 0.6863 (9)   | 0.054 (2)   | 0.691 (3) |
| H14  | 1.2979       | -0.0413      | 0.6361       | 0.064*      | 0.691 (3) |
| S1'  | 1.1578 (8)   | -0.0323 (4)  | 0.8685 (6)   | 0.0512 (11) | 0.309 (3) |
| C11' | 1.071 (2)    | 0.0236 (17)  | 0.7853 (15)  | 0.035 (5)   | 0.309 (3) |
| C12' | 1.1315 (17)  | 0.0266 (11)  | 0.6919 (11)  | 0.065 (4)   | 0.309 (3) |
| H12' | 1.1068       | 0.0607       | 0.6407       | 0.077*      | 0.309 (3) |
| C13' | 1.230 (2)    | -0.0186 (15) | 0.666 (2)    | 0.053 (3)   | 0.309 (3) |
| H13' | 1.2676       | -0.0253      | 0.6010       | 0.063*      | 0.309 (3) |
| C14' | 1.252 (3)    | -0.049 (2)   | 0.7639 (19)  | 0.055 (4)   | 0.309 (3) |
| H14' | 1.3186       | -0.0786      | 0.7751       | 0.065*      | 0.309 (3) |

Atomic displacement parameters ( $\text{\AA}^2$ )

|     | $U^{11}$    | $U^{22}$    | $U^{33}$    | $U^{12}$     | $U^{13}$     | $U^{23}$     |
|-----|-------------|-------------|-------------|--------------|--------------|--------------|
| C1  | 0.0379 (11) | 0.0318 (10) | 0.0268 (10) | 0.0002 (9)   | 0.0069 (8)   | 0.0045 (8)   |
| C2  | 0.0401 (12) | 0.0479 (13) | 0.0367 (11) | 0.0005 (10)  | 0.0028 (10)  | 0.0000 (10)  |
| C3  | 0.0517 (14) | 0.0550 (14) | 0.0360 (12) | -0.0084 (12) | -0.0026 (10) | -0.0017 (11) |
| C4  | 0.0672 (17) | 0.0460 (13) | 0.0363 (12) | -0.0052 (12) | 0.0043 (12)  | -0.0081 (10) |
| C5  | 0.0576 (15) | 0.0386 (12) | 0.0396 (12) | 0.0069 (11)  | 0.0080 (11)  | -0.0051 (10) |
| C6  | 0.0436 (12) | 0.0311 (10) | 0.0310 (10) | 0.0020 (9)   | 0.0056 (9)   | 0.0009 (8)   |
| C7  | 0.0419 (12) | 0.0363 (11) | 0.0353 (11) | 0.0093 (10)  | 0.0085 (9)   | 0.0010 (9)   |
| C8  | 0.0318 (11) | 0.0346 (11) | 0.0302 (10) | 0.0047 (8)   | 0.0059 (8)   | 0.0018 (8)   |
| C9  | 0.0352 (11) | 0.0287 (10) | 0.0256 (9)  | 0.0042 (8)   | 0.0070 (8)   | 0.0049 (8)   |
| C10 | 0.0331 (11) | 0.0300 (10) | 0.0264 (10) | 0.0029 (9)   | 0.0064 (8)   | 0.0045 (8)   |
| C15 | 0.0370 (12) | 0.0459 (13) | 0.0353 (11) | 0.0059 (10)  | 0.0080 (9)   | 0.0036 (9)   |
| C16 | 0.0592 (16) | 0.0565 (15) | 0.0646 (16) | -0.0105 (13) | 0.0200 (13)  | 0.0145 (12)  |
| C17 | 0.0346 (11) | 0.0371 (11) | 0.0348 (11) | 0.0043 (9)   | 0.0056 (9)   | -0.0014 (9)  |

|      |             |             |             |              |              |              |
|------|-------------|-------------|-------------|--------------|--------------|--------------|
| C18  | 0.0784 (19) | 0.0402 (13) | 0.0747 (17) | 0.0104 (13)  | 0.0118 (15)  | -0.0183 (12) |
| C19  | 0.0315 (11) | 0.0303 (10) | 0.0345 (10) | 0.0046 (8)   | 0.0024 (9)   | 0.0009 (8)   |
| C20  | 0.0346 (12) | 0.0369 (11) | 0.0488 (13) | -0.0015 (9)  | 0.0049 (10)  | 0.0053 (10)  |
| C21  | 0.0279 (11) | 0.0397 (12) | 0.0566 (14) | -0.0031 (9)  | -0.0038 (10) | -0.0009 (10) |
| C22  | 0.0298 (11) | 0.0310 (10) | 0.0435 (12) | 0.0027 (9)   | -0.0037 (9)  | -0.0029 (9)  |
| C23  | 0.0346 (12) | 0.0480 (13) | 0.0531 (13) | 0.0006 (10)  | -0.0138 (10) | -0.0051 (11) |
| C24  | 0.0488 (14) | 0.0501 (13) | 0.0406 (12) | 0.0082 (11)  | -0.0159 (10) | -0.0002 (10) |
| C25  | 0.0411 (12) | 0.0385 (11) | 0.0346 (11) | 0.0090 (10)  | -0.0049 (9)  | -0.0014 (9)  |
| C26  | 0.0578 (15) | 0.0553 (14) | 0.0344 (12) | 0.0111 (12)  | -0.0027 (11) | 0.0091 (10)  |
| C27  | 0.0558 (16) | 0.0533 (14) | 0.0437 (13) | 0.0039 (12)  | 0.0098 (11)  | 0.0148 (11)  |
| C28  | 0.0393 (12) | 0.0454 (12) | 0.0432 (12) | -0.0003 (10) | 0.0064 (10)  | 0.0028 (10)  |
| C29  | 0.0344 (11) | 0.0323 (10) | 0.0332 (10) | 0.0048 (9)   | 0.0032 (9)   | 0.0003 (8)   |
| C30  | 0.0283 (11) | 0.0394 (11) | 0.0417 (12) | -0.0036 (9)  | -0.0007 (9)  | -0.0020 (9)  |
| C31  | 0.0330 (11) | 0.0365 (11) | 0.0334 (10) | 0.0000 (9)   | -0.0053 (9)  | 0.0014 (9)   |
| C32  | 0.0297 (10) | 0.0270 (10) | 0.0333 (10) | 0.0035 (8)   | 0.0002 (8)   | -0.0011 (8)  |
| C33  | 0.0298 (10) | 0.0271 (9)  | 0.0341 (10) | 0.0056 (8)   | -0.0027 (8)  | -0.0036 (8)  |
| C34  | 0.0334 (11) | 0.0290 (10) | 0.0316 (10) | 0.0065 (8)   | 0.0002 (8)   | -0.0033 (8)  |
| O1   | 0.0629 (11) | 0.0457 (9)  | 0.0633 (10) | 0.0259 (8)   | -0.0083 (9)  | -0.0094 (8)  |
| O2   | 0.0910 (14) | 0.0621 (11) | 0.0876 (13) | 0.0152 (10)  | 0.0616 (12)  | 0.0072 (10)  |
| O3   | 0.0543 (10) | 0.0387 (8)  | 0.0566 (9)  | 0.0007 (7)   | 0.0249 (8)   | 0.0074 (7)   |
| O4   | 0.0868 (13) | 0.0656 (11) | 0.0406 (9)  | 0.0292 (10)  | -0.0160 (9)  | -0.0160 (8)  |
| O5   | 0.0591 (10) | 0.0298 (7)  | 0.0449 (8)  | 0.0050 (7)   | 0.0069 (7)   | -0.0016 (6)  |
| S1   | 0.0468 (6)  | 0.0439 (6)  | 0.0418 (8)  | 0.0002 (5)   | 0.0211 (6)   | -0.0049 (6)  |
| C11  | 0.027 (3)   | 0.035 (4)   | 0.037 (4)   | 0.007 (3)    | 0.010 (3)    | -0.002 (3)   |
| C12  | 0.054 (5)   | 0.069 (5)   | 0.068 (6)   | 0.004 (4)    | 0.010 (4)    | -0.003 (4)   |
| C13  | 0.041 (3)   | 0.049 (3)   | 0.079 (5)   | 0.012 (3)    | 0.003 (3)    | 0.003 (4)    |
| C14  | 0.045 (3)   | 0.050 (4)   | 0.068 (6)   | 0.010 (2)    | 0.026 (4)    | -0.009 (4)   |
| S1'  | 0.0454 (18) | 0.0493 (17) | 0.058 (2)   | 0.0157 (14)  | -0.0010 (16) | 0.0060 (15)  |
| C11' | 0.046 (9)   | 0.029 (8)   | 0.031 (8)   | -0.008 (7)   | -0.007 (7)   | 0.008 (7)    |
| C12' | 0.085 (7)   | 0.057 (6)   | 0.052 (7)   | 0.008 (5)    | 0.002 (6)    | 0.005 (6)    |
| C13' | 0.051 (6)   | 0.056 (7)   | 0.051 (6)   | -0.010 (5)   | 0.007 (5)    | 0.008 (5)    |
| C14' | 0.043 (7)   | 0.059 (8)   | 0.062 (8)   | 0.016 (6)    | 0.003 (6)    | 0.002 (7)    |

Geometric parameters (Å, °)

|        |           |         |           |
|--------|-----------|---------|-----------|
| C1—C2  | 1.395 (3) | C22—C33 | 1.420 (3) |
| C1—C6  | 1.405 (3) | C22—C23 | 1.435 (3) |
| C1—C10 | 1.478 (3) | C23—C24 | 1.330 (3) |
| C2—C3  | 1.377 (3) | C23—H23 | 0.9300    |
| C2—H2  | 0.9300    | C24—C25 | 1.429 (3) |
| C3—C4  | 1.369 (3) | C24—H24 | 0.9300    |

|           |             |             |             |
|-----------|-------------|-------------|-------------|
| C3—H3     | 0.9300      | C25—C26     | 1.391 (3)   |
| C4—C5     | 1.373 (3)   | C25—C34     | 1.423 (3)   |
| C4—H4     | 0.9300      | C26—C27     | 1.374 (3)   |
| C5—C6     | 1.392 (3)   | C26—H26     | 0.9300      |
| C5—H5     | 0.9300      | C27—C28     | 1.376 (3)   |
| C6—C7     | 1.467 (3)   | C27—H27     | 0.9300      |
| C7—O1     | 1.212 (2)   | C28—C29     | 1.402 (3)   |
| C7—C8     | 1.546 (3)   | C28—H28     | 0.9300      |
| C8—C9     | 1.532 (3)   | C29—C34     | 1.413 (3)   |
| C8—C19    | 1.535 (3)   | C29—C30     | 1.425 (3)   |
| C8—C15    | 1.547 (3)   | C30—C31     | 1.346 (3)   |
| C9—C10    | 1.345 (3)   | C30—H30     | 0.9300      |
| C9—C17    | 1.503 (3)   | C31—C32     | 1.434 (3)   |
| C10—C11'  | 1.421 (16)  | C31—H31     | 0.9300      |
| C10—C11   | 1.500 (6)   | C32—C33     | 1.423 (3)   |
| C15—O2    | 1.191 (2)   | C33—C34     | 1.428 (3)   |
| C15—O3    | 1.314 (2)   | S1—C11      | 1.705 (6)   |
| C16—O3    | 1.448 (2)   | S1—C14      | 1.717 (6)   |
| C16—H16A  | 0.9600      | C11—C12     | 1.349 (10)  |
| C16—H16B  | 0.9600      | C12—C13     | 1.425 (12)  |
| C16—H16C  | 0.9600      | C12—H12     | 0.9300      |
| C17—O4    | 1.196 (2)   | C13—C14     | 1.334 (6)   |
| C17—O5    | 1.325 (2)   | C13—H13     | 0.9300      |
| C18—O5    | 1.441 (2)   | C14—H14     | 0.9300      |
| C18—H18A  | 0.9600      | S1'—C14'    | 1.714 (10)  |
| C18—H18B  | 0.9600      | S1'—C11'    | 1.719 (10)  |
| C18—H18C  | 0.9600      | C11'—C12'   | 1.351 (13)  |
| C19—C20   | 1.383 (3)   | C12'—C13'   | 1.422 (14)  |
| C19—C32   | 1.415 (3)   | C12'—H12'   | 0.9300      |
| C20—C21   | 1.377 (3)   | C13'—C14'   | 1.335 (9)   |
| C20—H20   | 0.9300      | C13'—H13'   | 0.9300      |
| C21—C22   | 1.383 (3)   | C14'—H14'   | 0.9300      |
| C21—H21   | 0.9300      |             |             |
| C2—C1—C6  | 117.75 (18) | C33—C22—C23 | 118.67 (18) |
| C2—C1—C10 | 122.26 (18) | C24—C23—C22 | 121.4 (2)   |
| C6—C1—C10 | 119.98 (18) | C24—C23—H23 | 119.3       |
| C3—C2—C1  | 120.9 (2)   | C22—C23—H23 | 119.3       |
| C3—C2—H2  | 119.5       | C23—C24—C25 | 122.2 (2)   |
| C1—C2—H2  | 119.5       | C23—C24—H24 | 118.9       |
| C4—C3—C2  | 120.9 (2)   | C25—C24—H24 | 118.9       |



|               |             |             |             |
|---------------|-------------|-------------|-------------|
| C4—C3—H3      | 119.6       | C26—C25—C34 | 118.4 (2)   |
| C2—C3—H3      | 119.6       | C26—C25—C24 | 123.47 (19) |
| C3—C4—C5      | 119.6 (2)   | C34—C25—C24 | 118.14 (19) |
| C3—C4—H4      | 120.2       | C27—C26—C25 | 121.7 (2)   |
| C5—C4—H4      | 120.2       | C27—C26—H26 | 119.2       |
| C4—C5—C6      | 120.6 (2)   | C25—C26—H26 | 119.2       |
| C4—C5—H5      | 119.7       | C26—C27—C28 | 120.7 (2)   |
| C6—C5—H5      | 119.7       | C26—C27—H27 | 119.7       |
| C5—C6—C1      | 120.13 (19) | C28—C27—H27 | 119.7       |
| C5—C6—C7      | 119.65 (18) | C27—C28—C29 | 120.1 (2)   |
| C1—C6—C7      | 120.15 (17) | C27—C28—H28 | 120.0       |
| O1—C7—C6      | 122.76 (19) | C29—C28—H28 | 120.0       |
| O1—C7—C8      | 120.05 (19) | C28—C29—C34 | 119.60 (18) |
| C6—C7—C8      | 117.09 (16) | C28—C29—C30 | 122.49 (19) |
| C9—C8—C19     | 113.07 (15) | C34—C29—C30 | 117.91 (17) |
| C9—C8—C7      | 112.70 (16) | C31—C30—C29 | 121.98 (18) |
| C19—C8—C7     | 110.16 (15) | C31—C30—H30 | 119.0       |
| C9—C8—C15     | 108.54 (15) | C29—C30—H30 | 119.0       |
| C19—C8—C15    | 110.24 (16) | C30—C31—C32 | 122.13 (18) |
| C7—C8—C15     | 101.50 (15) | C30—C31—H31 | 118.9       |
| C10—C9—C17    | 121.10 (17) | C32—C31—H31 | 118.9       |
| C10—C9—C8     | 122.38 (17) | C19—C32—C33 | 118.90 (17) |
| C17—C9—C8     | 116.49 (17) | C19—C32—C31 | 123.95 (17) |
| C9—C10—C11'   | 120.3 (15)  | C33—C32—C31 | 117.15 (17) |
| C9—C10—C1     | 121.27 (17) | C22—C33—C32 | 120.17 (17) |
| C11'—C10—C1   | 118.4 (15)  | C22—C33—C34 | 119.40 (17) |
| C9—C10—C11    | 119.8 (7)   | C32—C33—C34 | 120.41 (17) |
| C11'—C10—C11  | 1.2 (19)    | C29—C34—C25 | 119.54 (18) |
| C1—C10—C11    | 118.9 (7)   | C29—C34—C33 | 120.35 (17) |
| O2—C15—O3     | 123.79 (19) | C25—C34—C33 | 120.09 (18) |
| O2—C15—C8     | 123.40 (19) | C15—O3—C16  | 115.84 (16) |
| O3—C15—C8     | 112.80 (16) | C17—O5—C18  | 116.67 (17) |
| O3—C16—H16A   | 109.5       | C11—S1—C14  | 89.3 (4)    |
| O3—C16—H16B   | 109.5       | C12—C11—C10 | 129.9 (8)   |
| H16A—C16—H16B | 109.5       | C12—C11—S1  | 112.2 (7)   |
| O3—C16—H16C   | 109.5       | C10—C11—S1  | 117.7 (4)   |
| H16A—C16—H16C | 109.5       | C11—C12—C13 | 114.2 (11)  |
| H16B—C16—H16C | 109.5       | C11—C12—H12 | 122.9       |
| O4—C17—O5     | 123.28 (19) | C13—C12—H12 | 122.9       |
| O4—C17—C9     | 124.83 (18) | C14—C13—C12 | 108.6 (12)  |
| O5—C17—C9     | 111.87 (17) | C14—C13—H13 | 125.7       |

|               |              |                 |              |
|---------------|--------------|-----------------|--------------|
| O5—C18—H18A   | 109.5        | C12—C13—H13     | 125.7        |
| O5—C18—H18B   | 109.5        | C13—C14—S1      | 115.7 (9)    |
| H18A—C18—H18B | 109.5        | C13—C14—H14     | 122.1        |
| O5—C18—H18C   | 109.5        | S1—C14—H14      | 122.1        |
| H18A—C18—H18C | 109.5        | C14'—S1'—C11'   | 90.0 (13)    |
| H18B—C18—H18C | 109.5        | C12'—C11'—C10   | 129.4 (12)   |
| C20—C19—C32   | 119.24 (18)  | C12'—C11'—S1'   | 104.6 (12)   |
| C20—C19—C8    | 121.38 (17)  | C10—C11'—S1'    | 126.0 (10)   |
| C32—C19—C8    | 119.37 (17)  | C11'—C12'—C13'  | 124.6 (19)   |
| C21—C20—C19   | 121.83 (19)  | C11'—C12'—H12'  | 117.7        |
| C21—C20—H20   | 119.1        | C13'—C12'—H12'  | 117.7        |
| C19—C20—H20   | 119.1        | C14'—C13'—C12'  | 99 (3)       |
| C20—C21—C22   | 121.08 (19)  | C14'—C13'—H13'  | 130.3        |
| C20—C21—H21   | 119.5        | C12'—C13'—H13'  | 130.3        |
| C22—C21—H21   | 119.5        | C13'—C14'—S1'   | 120 (2)      |
| C21—C22—C33   | 118.75 (18)  | C13'—C14'—H14'  | 119.8        |
| C21—C22—C23   | 122.57 (19)  | S1'—C14'—H14'   | 119.8        |
| C6—C1—C2—C3   | 3.4 (3)      | C34—C25—C26—C27 | 0.4 (3)      |
| C10—C1—C2—C3  | -176.23 (18) | C24—C25—C26—C27 | -179.7 (2)   |
| C1—C2—C3—C4   | -1.9 (3)     | C25—C26—C27—C28 | 0.9 (3)      |
| C2—C3—C4—C5   | -1.3 (3)     | C26—C27—C28—C29 | -1.3 (3)     |
| C3—C4—C5—C6   | 2.8 (3)      | C27—C28—C29—C34 | 0.5 (3)      |
| C4—C5—C6—C1   | -1.3 (3)     | C27—C28—C29—C30 | -178.90 (19) |
| C4—C5—C6—C7   | -178.23 (19) | C28—C29—C30—C31 | 176.80 (19)  |
| C2—C1—C6—C5   | -1.8 (3)     | C34—C29—C30—C31 | -2.6 (3)     |
| C10—C1—C6—C5  | 177.80 (17)  | C29—C30—C31—C32 | 0.9 (3)      |
| C2—C1—C6—C7   | 175.15 (18)  | C20—C19—C32—C33 | 0.3 (3)      |
| C10—C1—C6—C7  | -5.3 (3)     | C8—C19—C32—C33  | 179.54 (16)  |
| C5—C6—C7—O1   | 18.2 (3)     | C20—C19—C32—C31 | -179.84 (18) |
| C1—C6—C7—O1   | -158.8 (2)   | C8—C19—C32—C31  | -0.6 (3)     |
| C5—C6—C7—C8   | -158.18 (18) | C30—C31—C32—C19 | -178.23 (18) |
| C1—C6—C7—C8   | 24.9 (3)     | C30—C31—C32—C33 | 1.7 (3)      |
| O1—C7—C8—C9   | 154.97 (18)  | C21—C22—C33—C32 | 1.4 (3)      |
| C6—C7—C8—C9   | -28.6 (2)    | C23—C22—C33—C32 | -179.49 (17) |
| O1—C7—C8—C19  | 27.7 (2)     | C21—C22—C33—C34 | -177.63 (17) |
| C6—C7—C8—C19  | -155.90 (16) | C23—C22—C33—C34 | 1.5 (3)      |
| O1—C7—C8—C15  | -89.1 (2)    | C19—C32—C33—C22 | -1.5 (3)     |
| C6—C7—C8—C15  | 87.31 (19)   | C31—C32—C33—C22 | 178.59 (17)  |
| C19—C8—C9—C10 | 140.56 (18)  | C19—C32—C33—C34 | 177.47 (17)  |
| C7—C8—C9—C10  | 14.8 (2)     | C31—C32—C33—C34 | -2.4 (3)     |

|                 |              |                     |              |
|-----------------|--------------|---------------------|--------------|
| C15—C8—C9—C10   | -96.8 (2)    | C28—C29—C34—C25     | 0.8 (3)      |
| C19—C8—C9—C17   | -41.6 (2)    | C30—C29—C34—C25     | -179.81 (17) |
| C7—C8—C9—C17    | -167.36 (15) | C28—C29—C34—C33     | -177.67 (17) |
| C15—C8—C9—C17   | 81.03 (19)   | C30—C29—C34—C33     | 1.7 (3)      |
| C17—C9—C10—C11' | 9.6 (11)     | C26—C25—C34—C29     | -1.2 (3)     |
| C8—C9—C10—C11'  | -172.7 (11)  | C24—C25—C34—C29     | 178.87 (18)  |
| C17—C9—C10—C1   | -173.57 (16) | C26—C25—C34—C33     | 177.24 (18)  |
| C8—C9—C10—C1    | 4.2 (3)      | C24—C25—C34—C33     | -2.7 (3)     |
| C17—C9—C10—C11  | 8.3 (5)      | C22—C33—C34—C29     | 179.74 (17)  |
| C8—C9—C10—C11   | -174.0 (5)   | C32—C33—C34—C29     | 0.8 (3)      |
| C2—C1—C10—C9    | 169.54 (18)  | C22—C33—C34—C25     | 1.3 (3)      |
| C6—C1—C10—C9    | -10.0 (3)    | C32—C33—C34—C25     | -177.70 (17) |
| C2—C1—C10—C11'  | -13.6 (10)   | O2—C15—O3—C16       | -1.0 (3)     |
| C6—C1—C10—C11'  | 166.8 (10)   | C8—C15—O3—C16       | 178.12 (18)  |
| C2—C1—C10—C11   | -12.3 (5)    | O4—C17—O5—C18       | 13.0 (3)     |
| C6—C1—C10—C11   | 168.1 (5)    | C9—C17—O5—C18       | -168.71 (18) |
| C9—C8—C15—O2    | 151.4 (2)    | C9—C10—C11—C12      | -116.6 (17)  |
| C19—C8—C15—O2   | -84.2 (3)    | C11'—C10—C11—C12    | 131 (81)     |
| C7—C8—C15—O2    | 32.5 (3)     | C1—C10—C11—C12      | 65 (2)       |
| C9—C8—C15—O3    | -27.7 (2)    | C9—C10—C11—S1       | 57.6 (13)    |
| C19—C8—C15—O3   | 96.7 (2)     | C11'—C10—C11—S1     | -54 (78)     |
| C7—C8—C15—O3    | -146.59 (18) | C1—C10—C11—S1       | -120.6 (9)   |
| C10—C9—C17—O4   | -133.5 (2)   | C14—S1—C11—C12      | -1.3 (14)    |
| C8—C9—C17—O4    | 48.7 (3)     | C14—S1—C11—C10      | -176.5 (13)  |
| C10—C9—C17—O5   | 48.3 (2)     | C10—C11—C12—C13     | 175.3 (16)   |
| C8—C9—C17—O5    | -129.54 (17) | S1—C11—C12—C13      | 1 (2)        |
| C9—C8—C19—C20   | 114.1 (2)    | C11—C12—C13—C14     | 0 (2)        |
| C7—C8—C19—C20   | -118.8 (2)   | C12—C13—C14—S1      | -1.2 (18)    |
| C15—C8—C19—C20  | -7.6 (2)     | C11—S1—C14—C13      | 1.5 (13)     |
| C9—C8—C19—C32   | -65.2 (2)    | C9—C10—C11'—C12'    | 62 (4)       |
| C7—C8—C19—C32   | 61.9 (2)     | C1—C10—C11'—C12'    | -115 (3)     |
| C15—C8—C19—C32  | 173.14 (16)  | C11—C10—C11'—C12'   | 131 (82)     |
| C32—C19—C20—C21 | 1.1 (3)      | C9—C10—C11'—S1'     | -119 (2)     |
| C8—C19—C20—C21  | -178.11 (18) | C1—C10—C11'—S1'     | 65 (3)       |
| C19—C20—C21—C22 | -1.3 (3)     | C11—C10—C11'—S1'    | -50 (76)     |
| C20—C21—C22—C33 | 0.0 (3)      | C14'—S1'—C11'—C12'  | -5 (3)       |
| C20—C21—C22—C23 | -179.07 (19) | C14'—S1'—C11'—C10   | 176 (3)      |
| C21—C22—C23—C24 | 176.0 (2)    | C10—C11'—C12'—C13'  | -169 (3)     |
| C33—C22—C23—C24 | -3.1 (3)     | S1'—C11'—C12'—C13'  | 11 (4)       |
| C22—C23—C24—C25 | 1.7 (3)      | C11'—C12'—C13'—C14' | -11 (4)      |
| C23—C24—C25—C26 | -178.7 (2)   | C12'—C13'—C14'—S1'  | 6 (4)        |

C23—C24—C25—C34 1.2 (3)

C11'—S1'—C14'—C13' -1 (4)

Crystallographic data of  $\beta$ -keto-ester **9h**:

CCDC Number is **1450133**

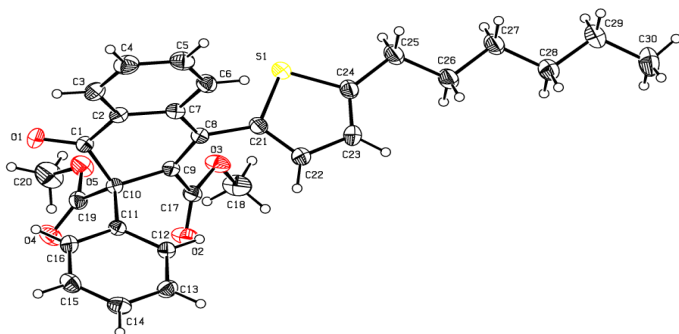

### Computing details

Program(s) used to solve structure: *SHELXS97* (Sheldrick, 1990); program(s) used to refine structure: *SHELXL97* (Sheldrick, 1997).

## Dimethyl-4-(5-hexylthiophen-2-yl)-1-oxo-2-phenyl-1,2-dihydronaphthalene-2,3-dicarboxylate (**9h**)

# Experimental

### Crystal data

$C_{30}H_{30}O_5S$

$M_r = 502.60$

Triclinic, *P*1

Hall symbol: -P 1

$a = 7.4725 (4) \text{ \AA}$

$b = 12.9073 (7) \text{ \AA}$

$c = 14.9503 (8) \text{ \AA}$

$\alpha = 105.607 (2)^\circ$

$\beta = 103.985 (4)^\circ$

$\gamma = 100.951 (5)^\circ$

$V = 1296.49 (12) \text{ \AA}^3$

$Z = 2$

$F(000) = 532$

$D_x = 1.287 \text{ Mg m}^{-3}$

Mo  $K\alpha$  radiation,  $\lambda = 0.71073 \text{ \AA}$

Cell parameters  
from 5097 reflections

$\theta = 2.6\text{--}26.0^\circ$

$\mu = 0.16 \text{ mm}^{-1}$

$T = 296 \text{ K}$

Block, colourless

$0.35 \times 0.30 \times 0.25 \text{ mm}$

### Data collection

Kappa ApexII CCD Diffractometer

Radiation source: fine-focus sealed tube

5097 independent reflections

4006 reflections with  $I > 2\sigma(I)$



Graphite monochromator  $R_{\text{int}} = 0.034$   
 $\omega$  &  $\varphi$  scans  $\theta_{\text{max}} = 26.0^\circ$ ,  $\theta_{\text{min}} = 2.6^\circ$   
Absorption correction: multi-scan  
*SADABS* (Bruker, 2008)  $h = -9 \rightarrow 9$   
 $T_{\text{min}} = 0.945$ ,  $T_{\text{max}} = 0.960$   $k = -15 \rightarrow 15$   
26878 measured reflections  $l = -18 \rightarrow 18$

#### Refinement

Refinement on  $F^2$  Primary atom site  
location: structure-invariant direct  
methods  
Least-squares matrix: full Secondary atom site  
location: difference Fourier map  
Hydrogen site location: inferred  
from neighbouring sites  
 $R[F^2 > 2\sigma(F^2)] = 0.040$  H-atom parameters constrained  
 $wR(F^2) = 0.141$   $w = 1/[\sigma^2(F_o^2) + (0.0918P)^2 +$   
 $0.2678P]$   
 $S = 0.99$  where  $P = (F_o^2 + 2F_c^2)/3$   
5097 reflections  $(\Delta/\sigma)_{\text{max}} < 0.001$   
328 parameters  $\Delta\rho_{\text{max}} = 0.37 \text{ e } \text{\AA}^{-3}$   
0 restraints  $\Delta\rho_{\text{min}} = -0.26 \text{ e } \text{\AA}^{-3}$

#### Special details

##### Refinement

Refinement of  $F^2$  against ALL reflections. The weighted  $R$ -factor  $wR$  and goodness of fit  $S$  are based on  $F^2$ , conventional  $R$ -factors  $R$  are based on  $F$ , with  $F$  set to zero for negative  $F^2$ . The threshold expression of  $F^2 > \sigma(F^2)$  is used only for calculating  $R$ -factors(gt) *etc.* and is not relevant to the choice of reflections for refinement.  $R$ -factors based on  $F^2$  are statistically about twice as large as those based on  $F$ , and  $R$ -factors based on ALL data will be even larger.

#### Fractional atomic coordinates and isotropic or equivalent isotropic displacement parameters ( $\text{\AA}^2$ )

|           | $x$        | $Y$          | $z$          | $U_{\text{iso}}^*/U_{\text{eq}}$ |
|-----------|------------|--------------|--------------|----------------------------------|
| <b>C1</b> | 0.5780 (2) | 0.72824 (15) | 0.36737 (12) | 0.0379 (4)                       |
| <b>C2</b> | 0.6857 (2) | 0.84143 (14) | 0.37843 (13) | 0.0376 (4)                       |
| <b>C3</b> | 0.6631 (3) | 0.93389 (16) | 0.44287 (15) | 0.0494 (5)                       |
| <b>H3</b> | 0.5780     | 0.9243       | 0.4781       | 0.059*                           |
| <b>C4</b> | 0.7660 (3) | 1.03996 (17) | 0.45504 (16) | 0.0560 (5)                       |
| <b>H4</b> | 0.7517     | 1.1018       | 0.4990       | 0.067*                           |
| <b>C5</b> | 0.8899 (3) | 1.05410 (16) | 0.40195 (15) | 0.0525 (5)                       |
| <b>H5</b> | 0.9600     | 1.1257       | 0.4104       | 0.063*                           |
| <b>C6</b> | 0.9110 (3) | 0.96248 (15) | 0.33594 (14) | 0.0446 (4)                       |
| <b>H6</b> | 0.9935     | 0.9732       | 0.2995       | 0.054*                           |
| <b>C7</b> | 0.8103 (2) | 0.85453 (14) | 0.32345 (12) | 0.0362 (4)                       |
| <b>C8</b> | 0.8286 (2) | 0.75488 (13) | 0.25340 (12) | 0.0337 (3)                       |
| <b>C9</b> | 0.7558 (2) | 0.65176 (13) | 0.25477 (11) | 0.0330 (3)                       |

|      |            |              |               |            |
|------|------------|--------------|---------------|------------|
| C10  | 0.6708 (2) | 0.63412 (13) | 0.33416 (12)  | 0.0331 (3) |
| C11  | 0.8220 (2) | 0.63934 (13) | 0.42672 (11)  | 0.0322 (3) |
| C12  | 1.0123 (2) | 0.64787 (14) | 0.43176 (12)  | 0.0365 (4) |
| H12  | 1.0524     | 0.6532       | 0.3785        | 0.044*     |
| C13  | 1.1428 (3) | 0.64849 (15) | 0.51516 (14)  | 0.0433 (4) |
| H13  | 1.2699     | 0.6541       | 0.5176        | 0.052*     |
| C14  | 1.0859 (3) | 0.64085 (15) | 0.59430 (13)  | 0.0469 (4) |
| H14  | 1.1734     | 0.6397       | 0.6498        | 0.056*     |
| C15  | 0.8985 (3) | 0.63495 (17) | 0.59094 (14)  | 0.0489 (5) |
| H15  | 0.8602     | 0.6315       | 0.6451        | 0.059*     |
| C16  | 0.7670 (3) | 0.63409 (15) | 0.50811 (13)  | 0.0417 (4) |
| H16  | 0.6407     | 0.6300       | 0.5067        | 0.050*     |
| C17  | 0.7642 (2) | 0.54771 (14) | 0.18483 (12)  | 0.0372 (4) |
| C18  | 0.7152 (4) | 0.44620 (19) | 0.02138 (15)  | 0.0641 (6) |
| H18A | 0.8420     | 0.4365       | 0.0328        | 0.096*     |
| H18B | 0.6709     | 0.4512       | -0.0428       | 0.096*     |
| H18C | 0.6303     | 0.3835       | 0.0263        | 0.096*     |
| C19  | 0.5116 (2) | 0.52348 (15) | 0.29554 (13)  | 0.0405 (4) |
| C20  | 0.2373 (3) | 0.4132 (2)   | 0.16447 (19)  | 0.0767 (8) |
| H20A | 0.2817     | 0.3506       | 0.1739        | 0.115*     |
| H20B | 0.1864     | 0.4004       | 0.0958        | 0.115*     |
| H20C | 0.1389     | 0.4219       | 0.1947        | 0.115*     |
| C21  | 0.9427 (2) | 0.77292 (14) | 0.18819 (12)  | 0.0377 (4) |
| C22  | 1.1179 (3) | 0.75668 (17) | 0.19409 (14)  | 0.0466 (4) |
| H22  | 1.1823     | 0.7290       | 0.2398        | 0.056*     |
| C23  | 1.1931 (3) | 0.78627 (18) | 0.12325 (15)  | 0.0507 (5) |
| H23  | 1.3127     | 0.7802       | 0.1184        | 0.061*     |
| C24  | 1.0764 (3) | 0.82387 (15) | 0.06361 (13)  | 0.0427 (4) |
| C25  | 1.1068 (3) | 0.86537 (18) | -0.01800 (16) | 0.0536 (5) |
| H25A | 0.9893     | 0.8352       | -0.0726       | 0.064*     |
| H25B | 1.1327     | 0.9462       | 0.0041        | 0.064*     |
| C26  | 1.2680 (3) | 0.83450 (18) | -0.05301 (16) | 0.0558 (5) |
| H26A | 1.2400     | 0.7536       | -0.0769       | 0.067*     |
| H26B | 1.3845     | 0.8625       | 0.0021        | 0.067*     |
| C27  | 1.3039 (3) | 0.87873 (18) | -0.13271 (16) | 0.0551 (5) |
| H27A | 1.3286     | 0.9594       | -0.1099       | 0.066*     |
| H27B | 1.1895     | 0.8486       | -0.1890       | 0.066*     |
| C28  | 1.4713 (3) | 0.84909 (19) | -0.16360 (16) | 0.0553 (5) |
| H28A | 1.5852     | 0.8790       | -0.1070       | 0.066*     |
| H28B | 1.4462     | 0.7684       | -0.1861       | 0.066*     |
| C29  | 1.5111 (3) | 0.8920 (2)   | -0.24299 (17) | 0.0610 (6) |
| H29A | 1.3960     | 0.8638       | -0.2989       | 0.073*     |
| H29B | 1.5397     | 0.9729       | -0.2198       | 0.073*     |

|             |              |              |              |              |
|-------------|--------------|--------------|--------------|--------------|
| <b>C30</b>  | 1.6739 (4)   | 0.8599 (3)   | -0.2755 (2)  | 0.0926 (9)   |
| <b>H30A</b> | 1.7908       | 0.8928       | -0.2221      | 0.139*       |
| <b>H30B</b> | 1.6858       | 0.8863       | -0.3286      | 0.139*       |
| <b>H30C</b> | 1.6490       | 0.7799       | -0.2968      | 0.139*       |
| <b>O1</b>   | 0.43014 (18) | 0.70978 (12) | 0.38749 (11) | 0.0547 (4)   |
| <b>O2</b>   | 0.7987 (2)   | 0.46977 (11) | 0.20797 (10) | 0.0574 (4)   |
| <b>O3</b>   | 0.7186 (2)   | 0.54740 (10) | 0.09311 (9)  | 0.0492 (3)   |
| <b>O4</b>   | 0.4904 (2)   | 0.45687 (12) | 0.33575 (11) | 0.0566 (4)   |
| <b>O5</b>   | 0.39542 (18) | 0.51356 (12) | 0.20815 (10) | 0.0530 (4)   |
| <b>S1</b>   | 0.86882 (7)  | 0.82415 (4)  | 0.09458 (4)  | 0.04751 (16) |

*Atomic displacement parameters ( $\text{\AA}^2$ )*

|            | $U^{11}$    | $U^{22}$    | $U^{33}$    | $U^{12}$     | $U^{13}$     | $U^{23}$    |
|------------|-------------|-------------|-------------|--------------|--------------|-------------|
| <b>C1</b>  | 0.0349 (8)  | 0.0472 (10) | 0.0408 (9)  | 0.0170 (7)   | 0.0159 (7)   | 0.0212 (8)  |
| <b>C2</b>  | 0.0381 (9)  | 0.0394 (9)  | 0.0429 (9)  | 0.0178 (7)   | 0.0164 (7)   | 0.0172 (7)  |
| <b>C3</b>  | 0.0545 (11) | 0.0491 (11) | 0.0571 (12) | 0.0272 (9)   | 0.0279 (9)   | 0.0186 (9)  |
| <b>C4</b>  | 0.0699 (13) | 0.0430 (11) | 0.0587 (12) | 0.0272 (10)  | 0.0230 (11)  | 0.0115 (9)  |
| <b>C5</b>  | 0.0606 (12) | 0.0352 (10) | 0.0589 (12) | 0.0126 (9)   | 0.0150 (10)  | 0.0149 (9)  |
| <b>C6</b>  | 0.0484 (10) | 0.0387 (10) | 0.0495 (10) | 0.0104 (8)   | 0.0186 (8)   | 0.0170 (8)  |
| <b>C7</b>  | 0.0381 (9)  | 0.0352 (9)  | 0.0381 (8)  | 0.0124 (7)   | 0.0115 (7)   | 0.0150 (7)  |
| <b>C8</b>  | 0.0336 (8)  | 0.0358 (8)  | 0.0355 (8)  | 0.0111 (7)   | 0.0121 (7)   | 0.0150 (7)  |
| <b>C9</b>  | 0.0336 (8)  | 0.0366 (9)  | 0.0336 (8)  | 0.0127 (6)   | 0.0121 (6)   | 0.0151 (7)  |
| <b>C10</b> | 0.0314 (8)  | 0.0348 (8)  | 0.0380 (8)  | 0.0098 (6)   | 0.0139 (7)   | 0.0163 (7)  |
| <b>C11</b> | 0.0343 (8)  | 0.0293 (8)  | 0.0361 (8)  | 0.0091 (6)   | 0.0128 (7)   | 0.0135 (7)  |
| <b>C12</b> | 0.0364 (8)  | 0.0375 (9)  | 0.0392 (9)  | 0.0113 (7)   | 0.0154 (7)   | 0.0146 (7)  |
| <b>C13</b> | 0.0352 (9)  | 0.0442 (10) | 0.0493 (10) | 0.0122 (7)   | 0.0094 (8)   | 0.0158 (8)  |
| <b>C14</b> | 0.0517 (11) | 0.0432 (10) | 0.0404 (10) | 0.0106 (8)   | 0.0040 (8)   | 0.0161 (8)  |
| <b>C15</b> | 0.0592 (12) | 0.0539 (11) | 0.0390 (10) | 0.0142 (9)   | 0.0196 (9)   | 0.0209 (9)  |
| <b>C16</b> | 0.0415 (9)  | 0.0486 (10) | 0.0431 (9)  | 0.0149 (8)   | 0.0199 (8)   | 0.0197 (8)  |
| <b>C17</b> | 0.0412 (9)  | 0.0360 (9)  | 0.0385 (9)  | 0.0126 (7)   | 0.0145 (7)   | 0.0155 (7)  |
| <b>C18</b> | 0.0969 (18) | 0.0569 (13) | 0.0391 (11) | 0.0328 (12)  | 0.0200 (11)  | 0.0097 (9)  |
| <b>C19</b> | 0.0347 (9)  | 0.0444 (10) | 0.0436 (9)  | 0.0075 (7)   | 0.0134 (7)   | 0.0175 (8)  |
| <b>C20</b> | 0.0569 (14) | 0.0750 (16) | 0.0681 (15) | -0.0176 (12) | -0.0063 (11) | 0.0239 (13) |
| <b>C21</b> | 0.0418 (9)  | 0.0360 (9)  | 0.0387 (9)  | 0.0101 (7)   | 0.0160 (7)   | 0.0150 (7)  |
| <b>C22</b> | 0.0460 (10) | 0.0589 (12) | 0.0478 (10) | 0.0213 (9)   | 0.0211 (8)   | 0.0273 (9)  |
| <b>C23</b> | 0.0482 (11) | 0.0621 (12) | 0.0550 (11) | 0.0203 (9)   | 0.0292 (9)   | 0.0250 (10) |
| <b>C24</b> | 0.0501 (10) | 0.0399 (9)  | 0.0446 (10) | 0.0124 (8)   | 0.0240 (8)   | 0.0158 (8)  |
| <b>C25</b> | 0.0675 (13) | 0.0540 (12) | 0.0554 (12) | 0.0197 (10)  | 0.0336 (10)  | 0.0286 (10) |
| <b>C26</b> | 0.0707 (13) | 0.0589 (12) | 0.0582 (12) | 0.0254 (10)  | 0.0377 (11)  | 0.0302 (10) |
| <b>C27</b> | 0.0681 (13) | 0.0556 (12) | 0.0558 (12) | 0.0184 (10)  | 0.0332 (11)  | 0.0271 (10) |
| <b>C28</b> | 0.0588 (12) | 0.0629 (13) | 0.0520 (11) | 0.0161 (10)  | 0.0243 (10)  | 0.0252 (10) |
| <b>C29</b> | 0.0646 (13) | 0.0654 (14) | 0.0583 (13) | 0.0095 (11)  | 0.0280 (11)  | 0.0266 (11) |
| <b>C30</b> | 0.0860 (19) | 0.125 (3)   | 0.096 (2)   | 0.0299 (18)  | 0.0607 (17)  | 0.0537 (19) |

|           |             |            |             |             |            |            |
|-----------|-------------|------------|-------------|-------------|------------|------------|
| <b>O1</b> | 0.0428 (7)  | 0.0646 (9) | 0.0781 (10) | 0.0244 (6)  | 0.0364 (7) | 0.0349 (8) |
| <b>O2</b> | 0.0915 (11) | 0.0443 (8) | 0.0473 (8)  | 0.0326 (7)  | 0.0234 (7) | 0.0212 (6) |
| <b>O3</b> | 0.0749 (9)  | 0.0404 (7) | 0.0343 (6)  | 0.0215 (6)  | 0.0157 (6) | 0.0129 (5) |
| <b>O4</b> | 0.0525 (8)  | 0.0520 (8) | 0.0623 (9)  | -0.0024 (6) | 0.0120 (7) | 0.0311 (7) |
| <b>O5</b> | 0.0421 (7)  | 0.0566 (8) | 0.0491 (8)  | -0.0028 (6) | 0.0029 (6) | 0.0211 (6) |
| <b>S1</b> | 0.0513 (3)  | 0.0581 (3) | 0.0509 (3)  | 0.0232 (2)  | 0.0252 (2) | 0.0319 (2) |

*Geometric parameters (Å, °)*

|          |           |          |             |
|----------|-----------|----------|-------------|
| C1—O1    | 1.211 (2) | C18—H18B | 0.9600      |
| C1—C2    | 1.473 (2) | C18—H18C | 0.9600      |
| C1—C10   | 1.538 (2) | C19—O4   | 1.182 (2)   |
| C2—C3    | 1.385 (3) | C19—O5   | 1.341 (2)   |
| C2—C7    | 1.398 (2) | C20—O5   | 1.446 (2)   |
| C3—C4    | 1.377 (3) | C20—H20A | 0.9600      |
| C3—H3    | 0.9300    | C20—H20B | 0.9600      |
| C4—C5    | 1.375 (3) | C20—H20C | 0.9600      |
| C4—H4    | 0.9300    | C21—C22  | 1.350 (3)   |
| C5—C6    | 1.384 (3) | C21—S1   | 1.7216 (17) |
| C5—H5    | 0.9300    | C22—C23  | 1.417 (3)   |
| C6—C7    | 1.392 (2) | C22—H22  | 0.9300      |
| C6—H6    | 0.9300    | C23—C24  | 1.345 (3)   |
| C7—C8    | 1.477 (2) | C23—H23  | 0.9300      |
| C8—C9    | 1.346 (2) | C24—C25  | 1.506 (2)   |
| C8—C21   | 1.477 (2) | C24—S1   | 1.7227 (18) |
| C9—C17   | 1.486 (2) | C25—C26  | 1.503 (3)   |
| C9—C10   | 1.523 (2) | C25—H25A | 0.9700      |
| C10—C11  | 1.537 (2) | C25—H25B | 0.9700      |
| C10—C19  | 1.538 (2) | C26—C27  | 1.510 (3)   |
| C11—C12  | 1.387 (2) | C26—H26A | 0.9700      |
| C11—C16  | 1.389 (2) | C26—H26B | 0.9700      |
| C12—C13  | 1.382 (2) | C27—C28  | 1.513 (3)   |
| C12—H12  | 0.9300    | C27—H27A | 0.9700      |
| C13—C14  | 1.371 (3) | C27—H27B | 0.9700      |
| C13—H13  | 0.9300    | C28—C29  | 1.505 (3)   |
| C14—C15  | 1.376 (3) | C28—H28A | 0.9700      |
| C14—H14  | 0.9300    | C28—H28B | 0.9700      |
| C15—C16  | 1.378 (3) | C29—C30  | 1.503 (3)   |
| C15—H15  | 0.9300    | C29—H29A | 0.9700      |
| C16—H16  | 0.9300    | C29—H29B | 0.9700      |
| C17—O2   | 1.200 (2) | C30—H30A | 0.9600      |
| C17—O3   | 1.329 (2) | C30—H30B | 0.9600      |
| C18—O3   | 1.441 (2) | C30—H30C | 0.9600      |
| C18—H18A | 0.9600    |          |             |



|             |             |               |             |
|-------------|-------------|---------------|-------------|
| O1—C1—C2    | 122.82 (16) | O4—C19—O5     | 124.12 (16) |
| O1—C1—C10   | 121.24 (16) | O4—C19—C10    | 126.43 (16) |
| C2—C1—C10   | 115.85 (13) | O5—C19—C10    | 109.45 (14) |
| C3—C2—C7    | 120.52 (16) | O5—C20—H20A   | 109.5       |
| C3—C2—C1    | 119.96 (16) | O5—C20—H20B   | 109.5       |
| C7—C2—C1    | 119.52 (15) | H20A—C20—H20B | 109.5       |
| C4—C3—C2    | 120.36 (18) | O5—C20—H20C   | 109.5       |
| C4—C3—H3    | 119.8       | H20A—C20—H20C | 109.5       |
| C2—C3—H3    | 119.8       | H20B—C20—H20C | 109.5       |
| C5—C4—C3    | 119.76 (18) | C22—C21—C8    | 126.54 (16) |
| C5—C4—H4    | 120.1       | C22—C21—S1    | 110.42 (13) |
| C3—C4—H4    | 120.1       | C8—C21—S1     | 123.00 (13) |
| C4—C5—C6    | 120.42 (18) | C21—C22—C23   | 112.88 (17) |
| C4—C5—H5    | 119.8       | C21—C22—H22   | 123.6       |
| C6—C5—H5    | 119.8       | C23—C22—H22   | 123.6       |
| C5—C6—C7    | 120.73 (17) | C24—C23—C22   | 114.13 (17) |
| C5—C6—H6    | 119.6       | C24—C23—H23   | 122.9       |
| C7—C6—H6    | 119.6       | C22—C23—H23   | 122.9       |
| C6—C7—C2    | 118.19 (16) | C23—C24—C25   | 129.83 (17) |
| C6—C7—C8    | 122.23 (15) | C23—C24—S1    | 109.91 (13) |
| C2—C7—C8    | 119.58 (15) | C25—C24—S1    | 120.24 (15) |
| C9—C8—C21   | 121.43 (14) | C26—C25—C24   | 114.06 (17) |
| C9—C8—C7    | 120.59 (14) | C26—C25—H25A  | 108.7       |
| C21—C8—C7   | 117.78 (14) | C24—C25—H25A  | 108.7       |
| C8—C9—C17   | 123.49 (14) | C26—C25—H25B  | 108.7       |
| C8—C9—C10   | 121.59 (14) | C24—C25—H25B  | 108.7       |
| C17—C9—C10  | 114.77 (13) | H25A—C25—H25B | 107.6       |
| C9—C10—C11  | 113.10 (12) | C25—C26—C27   | 114.55 (18) |
| C9—C10—C1   | 109.64 (13) | C25—C26—H26A  | 108.6       |
| C11—C10—C1  | 105.49 (13) | C27—C26—H26A  | 108.6       |
| C9—C10—C19  | 111.14 (13) | C25—C26—H26B  | 108.6       |
| C11—C10—C19 | 110.29 (13) | C27—C26—H26B  | 108.6       |
| C1—C10—C19  | 106.84 (13) | H26A—C26—H26B | 107.6       |
| C12—C11—C16 | 118.48 (15) | C26—C27—C28   | 112.92 (18) |
| C12—C11—C10 | 122.27 (14) | C26—C27—H27A  | 109.0       |
| C16—C11—C10 | 119.24 (14) | C28—C27—H27A  | 109.0       |
| C13—C12—C11 | 120.59 (16) | C26—C27—H27B  | 109.0       |
| C13—C12—H12 | 119.7       | C28—C27—H27B  | 109.0       |
| C11—C12—H12 | 119.7       | H27A—C27—H27B | 107.8       |
| C14—C13—C12 | 120.41 (17) | C29—C28—C27   | 114.27 (19) |
| C14—C13—H13 | 119.8       | C29—C28—H28A  | 108.7       |
| C12—C13—H13 | 119.8       | C27—C28—H28A  | 108.7       |
| C13—C14—C15 | 119.50 (17) | C29—C28—H28B  | 108.7       |

|                |              |                 |              |
|----------------|--------------|-----------------|--------------|
| C13—C14—H14    | 120.3        | C27—C28—H28B    | 108.7        |
| C15—C14—H14    | 120.3        | H28A—C28—H28B   | 107.6        |
| C14—C15—C16    | 120.62 (17)  | C30—C29—C28     | 114.2 (2)    |
| C14—C15—H15    | 119.7        | C30—C29—H29A    | 108.7        |
| C16—C15—H15    | 119.7        | C28—C29—H29A    | 108.7        |
| C15—C16—C11    | 120.38 (16)  | C30—C29—H29B    | 108.7        |
| C15—C16—H16    | 119.8        | C28—C29—H29B    | 108.7        |
| C11—C16—H16    | 119.8        | H29A—C29—H29B   | 107.6        |
| O2—C17—O3      | 123.48 (16)  | C29—C30—H30A    | 109.5        |
| O2—C17—C9      | 123.51 (15)  | C29—C30—H30B    | 109.5        |
| O3—C17—C9      | 112.89 (14)  | H30A—C30—H30B   | 109.5        |
| O3—C18—H18A    | 109.5        | C29—C30—H30C    | 109.5        |
| O3—C18—H18B    | 109.5        | H30A—C30—H30C   | 109.5        |
| H18A—C18—H18B  | 109.5        | H30B—C30—H30C   | 109.5        |
| O3—C18—H18C    | 109.5        | C17—O3—C18      | 115.33 (14)  |
| H18A—C18—H18C  | 109.5        | C19—O5—C20      | 114.84 (16)  |
| H18B—C18—H18C  | 109.5        | C21—S1—C24      | 92.67 (9)    |
| O1—C1—C2—C3    | 23.0 (3)     | C16—C11—C12—C13 | 1.5 (2)      |
| C10—C1—C2—C3   | -153.45 (16) | C10—C11—C12—C13 | -177.77 (15) |
| O1—C1—C2—C7    | -156.92 (18) | C11—C12—C13—C14 | -0.1 (3)     |
| C10—C1—C2—C7   | 26.6 (2)     | C12—C13—C14—C15 | -1.4 (3)     |
| C7—C2—C3—C4    | -1.3 (3)     | C13—C14—C15—C16 | 1.5 (3)      |
| C1—C2—C3—C4    | 178.77 (18)  | C14—C15—C16—C11 | -0.1 (3)     |
| C2—C3—C4—C5    | 0.9 (3)      | C12—C11—C16—C15 | -1.4 (3)     |
| C3—C4—C5—C6    | 0.4 (3)      | C10—C11—C16—C15 | 177.89 (16)  |
| C4—C5—C6—C7    | -1.2 (3)     | C8—C9—C17—O2    | 139.04 (19)  |
| C5—C6—C7—C2    | 0.8 (3)      | C10—C9—C17—O2   | -36.6 (2)    |
| C5—C6—C7—C8    | 179.70 (17)  | C8—C9—C17—O3    | -44.7 (2)    |
| C3—C2—C7—C6    | 0.4 (3)      | C10—C9—C17—O3   | 139.66 (15)  |
| C1—C2—C7—C6    | -179.61 (16) | C9—C10—C19—O4   | 135.44 (19)  |
| C3—C2—C7—C8    | -178.49 (16) | C11—C10—C19—O4  | 9.2 (2)      |
| C1—C2—C7—C8    | 1.5 (2)      | C1—C10—C19—O4   | -105.0 (2)   |
| C6—C7—C8—C9    | 168.58 (16)  | C9—C10—C19—O5   | -45.47 (18)  |
| C2—C7—C8—C9    | -12.5 (2)    | C11—C10—C19—O5  | -171.72 (13) |
| C6—C7—C8—C21   | -6.3 (2)     | C1—C10—C19—O5   | 74.11 (17)   |
| C2—C7—C8—C21   | 172.56 (15)  | C9—C8—C21—C22   | -67.3 (3)    |
| C21—C8—C9—C17  | -7.0 (2)     | C7—C8—C21—C22   | 107.6 (2)    |
| C7—C8—C9—C17   | 178.29 (15)  | C9—C8—C21—S1    | 115.25 (17)  |
| C21—C8—C9—C10  | 168.39 (15)  | C7—C8—C21—S1    | -69.88 (19)  |
| C7—C8—C9—C10   | -6.3 (2)     | C8—C21—C22—C23  | -177.36 (17) |
| C8—C9—C10—C11  | -85.16 (18)  | S1—C21—C22—C23  | 0.3 (2)      |
| C17—C9—C10—C11 | 90.60 (17)   | C21—C22—C23—C24 | -0.4 (3)     |
| C8—C9—C10—C1   | 32.3 (2)     | C22—C23—C24—C25 | 178.37 (19)  |

|                 |              |                 |              |
|-----------------|--------------|-----------------|--------------|
| C17—C9—C10—C1   | -151.98 (14) | C22—C23—C24—S1  | 0.3 (2)      |
| C8—C9—C10—C19   | 150.16 (16)  | C23—C24—C25—C26 | 16.4 (3)     |
| C17—C9—C10—C19  | -34.09 (18)  | S1—C24—C25—C26  | -165.73 (16) |
| O1—C1—C10—C9    | 142.13 (17)  | C24—C25—C26—C27 | -178.19 (18) |
| C2—C1—C10—C9    | -41.33 (19)  | C25—C26—C27—C28 | 178.12 (19)  |
| O1—C1—C10—C11   | -95.79 (19)  | C26—C27—C28—C29 | -179.97 (19) |
| C2—C1—C10—C11   | 80.76 (16)   | C27—C28—C29—C30 | -178.4 (2)   |
| O1—C1—C10—C19   | 21.6 (2)     | O2—C17—O3—C18   | -0.8 (3)     |
| C2—C1—C10—C19   | -161.87 (14) | C9—C17—O3—C18   | -177.08 (17) |
| C9—C10—C11—C12  | -6.2 (2)     | O4—C19—O5—C20   | 0.0 (3)      |
| C1—C10—C11—C12  | -125.99 (16) | C10—C19—O5—C20  | -179.14 (18) |
| C19—C10—C11—C12 | 118.99 (16)  | C22—C21—S1—C24  | -0.15 (15)   |
| C9—C10—C11—C16  | 174.60 (14)  | C8—C21—S1—C24   | 177.65 (15)  |
| C1—C10—C11—C16  | 54.77 (18)   | C23—C24—S1—C21  | -0.09 (16)   |
| C19—C10—C11—C16 | -60.25 (19)  | C25—C24—S1—C21  | -178.37 (16) |

Hydrogen-bond geometry ( $\text{\AA}$ ,  $^\circ$ )

| <i>D</i> —H $\cdots$ <i>A</i>     | <i>D</i> —H | H $\cdots$ <i>A</i> | <i>D</i> $\cdots$ <i>A</i> | <i>D</i> —H $\cdots$ <i>A</i> |
|-----------------------------------|-------------|---------------------|----------------------------|-------------------------------|
| C18—H18B $\cdots$ O5 <sup>i</sup> | 0.96        | 2.58                | 3.533 (3)                  | 171                           |
| C22—H22 $\cdots$ O1 <sup>ii</sup> | 0.93        | 2.62                | 3.520 (2)                  | 163                           |

Symmetry codes: (i)  $-x+1, -y+1, -z$ ; (ii)  $x+1, y, z$ .

Crystallographic data of  $\beta$ -keto-ester **10b**:

CCDC Number is **1438209**.

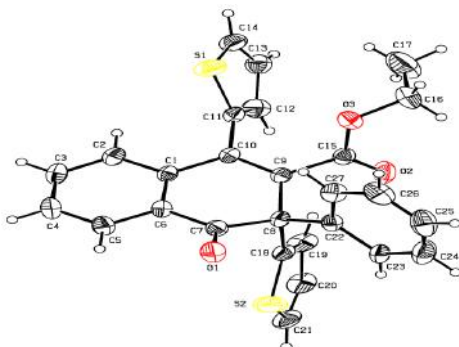

## Computing details

Program(s) used to solve structure: *SHELXS97* (Sheldrick, 1990); program(s) used to refine structure: *SHELXL97* (Sheldrick, 1997). Computer programs: *SHELXS97* (Sheldrick, 1990), *SHELXL97* (Sheldrick, 1997).

## Ethyl-4-oxo-3-phenyl-1,3-di(thiophen-2-yl)-3,4-dihydronaphthalene-2-carboxylate (10b)

# Experimental

## Crystal data

|                                |                                                         |
|--------------------------------|---------------------------------------------------------|
| $C_{27}H_{20}O_3S_2$           | $V = 2262.8 (3) \text{ \AA}^3$                          |
| $M_r = 456.55$                 | $Z = 4$                                                 |
| $a = 12.1263 (11) \text{ \AA}$ | $F(000) = 952$                                          |
| $b = 11.8009 (11) \text{ \AA}$ | $D_x = 1.340 \text{ Mg m}^{-3}$                         |
| $c = 16.0657 (13) \text{ \AA}$ | Mo $K\alpha$ radiation, $\lambda = 0.71073 \text{ \AA}$ |
| $\alpha = 90^\circ$            | $\mu = 0.26 \text{ mm}^{-1}$                            |
| $\beta = 100.181 (2)^\circ$    | $T = 296 \text{ K}$                                     |
| $\gamma = 90^\circ$            | $0.25 \times 0.25 \times 0.15 \text{ mm}$               |

## Data collection

|                                          |                                                                        |
|------------------------------------------|------------------------------------------------------------------------|
| Radiation source: fine-focus sealed tube | $R_{\text{int}} = 0.044$                                               |
| Graphite monochromator                   | $\theta_{\text{max}} = 25.4^\circ$ , $\theta_{\text{min}} = 2.2^\circ$ |
| 29905 measured reflections               | $h = -14 \rightarrow 14$                                               |
| 4111 independent reflections             | $k = -14 \rightarrow 14$                                               |
| 2686 reflections with $I > 2\sigma(I)$   | $l = -19 \rightarrow 18$                                               |

## Refinement

|                                 |                                                                   |
|---------------------------------|-------------------------------------------------------------------|
| Refinement on $F^2$             | Primary atom site location:<br>structure-invariant direct methods |
| Least-squares matrix: full      | Secondary atom site location:<br>difference Fourier map           |
| $R[F^2 > 2\sigma(F^2)] = 0.061$ | Hydrogen site location: inferred<br>from neighbouring sites       |
| $wR(F^2) = 0.148$               | H atoms treated by a mixture of<br>independent and constrained    |



|                  |                                                        |
|------------------|--------------------------------------------------------|
|                  | refinement                                             |
| $S = 1.09$       | $w = 1/[\sigma^2(F_o^2) + (0.0338P)^2 + 2.9594P]$      |
|                  | where $P = (F_o^2 + 2F_c^2)/3$                         |
| 4111 reflections | $(\Delta/\sigma)_{\max} = 0.004$                       |
| 364 parameters   | $\Delta\rho_{\max} = 0.24 \text{ e } \text{\AA}^{-3}$  |
| 100 restraints   | $\Delta\rho_{\min} = -0.23 \text{ e } \text{\AA}^{-3}$ |

#### Special details

##### *Refinement*

Refinement of  $F^2$  against ALL reflections. The weighted  $R$ -factor  $wR$  and goodness of fit  $S$  are based on  $F^2$ , conventional  $R$ -factors  $R$  are based on  $F$ , with  $F$  set to zero for negative  $F^2$ . The threshold expression of  $F^2 > \sigma(F^2)$  is used only for calculating  $R$ -factors(gt) *etc.* and is not relevant to the choice of reflections for refinement.  $R$ -factors based on  $F^2$  are statistically about twice as large as those based on  $F$ , and  $R$ -factors based on ALL data will be even larger.

#### Fractional atomic coordinates and isotropic or equivalent isotropic displacement parameters ( $\text{\AA}^2$ )

|     | $x$        | $y$        | $Z$           | $U_{\text{iso}}^*/U_{\text{eq}}$ | Occ. (<1) |
|-----|------------|------------|---------------|----------------------------------|-----------|
| C7  | 0.6147 (3) | 0.7554 (3) | 0.11948 (19)  | 0.0430 (7)                       |           |
| C6  | 0.5745 (2) | 0.7440 (3) | 0.02783 (18)  | 0.0394 (7)                       |           |
| C5  | 0.4953 (3) | 0.6614 (3) | -0.0013 (2)   | 0.0519 (8)                       |           |
| H5  | 0.4686     | 0.6142     | 0.0371        | 0.062*                           |           |
| C4  | 0.4560 (3) | 0.6490 (3) | -0.0866 (2)   | 0.0600 (10)                      |           |
| H4  | 0.4034     | 0.5934     | -0.1059       | 0.072*                           |           |
| C3  | 0.4950 (3) | 0.7196 (3) | -0.1430 (2)   | 0.0575 (9)                       |           |
| H3  | 0.4687     | 0.7111     | -0.2006       | 0.069*                           |           |
| C2  | 0.5725 (3) | 0.8026 (3) | -0.11538 (19) | 0.0480 (8)                       |           |
| H2  | 0.5976     | 0.8498     | -0.1544       | 0.058*                           |           |
| C1  | 0.6138 (2) | 0.8163 (3) | -0.02929 (18) | 0.0369 (7)                       |           |
| C10 | 0.6948 (2) | 0.9062 (2) | 0.00282 (17)  | 0.0352 (7)                       |           |
| C9  | 0.7444 (2) | 0.9089 (3) | 0.08433 (18)  | 0.0368 (7)                       |           |
| C8  | 0.7274 (2) | 0.8171 (3) | 0.14761 (17)  | 0.0385 (7)                       |           |
| C22 | 0.7307 (3) | 0.8700 (3) | 0.23535 (18)  | 0.0424 (7)                       |           |
| C23 | 0.8062 (3) | 0.8363 (3) | 0.30967 (19)  | 0.0465 (8)                       |           |
| H23 | 0.8569     | 0.7774     | 0.3082        | 0.056*                           |           |
| C24 | 0.8016 (4) | 0.8933 (4) | 0.3831 (2)    | 0.0773 (13)                      |           |
| H24 | 0.8507     | 0.8724     | 0.4319        | 0.093*                           |           |
| C25 | 0.7296 (4) | 0.9778 (4) | 0.3875 (3)    | 0.0817 (14)                      |           |
| H25 | 0.7297     | 1.0143     | 0.4388        | 0.098*                           |           |

|      |             |             |               |             |           |
|------|-------------|-------------|---------------|-------------|-----------|
| C26  | 0.6570 (4)  | 1.0107 (4)  | 0.3185 (3)    | 0.0729 (12) |           |
| H26  | 0.6065      | 1.0689      | 0.3225        | 0.087*      |           |
| C27  | 0.6573 (3)  | 0.9589 (3)  | 0.2429 (2)    | 0.0555 (9)  |           |
| H27  | 0.6076      | 0.9831      | 0.1953        | 0.067*      |           |
| C15  | 0.8246 (3)  | 1.0013 (3)  | 0.11779 (19)  | 0.0450 (8)  |           |
| C16  | 0.8442 (4)  | 1.2005 (4)  | 0.1385 (3)    | 0.0862 (14) |           |
| H16A | 0.8015      | 1.2542      | 0.1657        | 0.103*      |           |
| H16B | 0.9088      | 1.1771      | 0.1796        | 0.103*      |           |
| C17  | 0.8812 (6)  | 1.2540 (5)  | 0.0680 (4)    | 0.123 (2)   |           |
| H17A | 0.9295      | 1.2032      | 0.0445        | 0.185*      |           |
| H17B | 0.9214      | 1.3221      | 0.0866        | 0.185*      |           |
| H17C | 0.8174      | 1.2724      | 0.0256        | 0.185*      |           |
| C11  | 0.7228 (2)  | 0.9919 (3)  | -0.05704 (19) | 0.0408 (7)  |           |
| S1'  | 0.8517 (4)  | 0.9931 (5)  | -0.0827 (3)   | 0.0550 (9)  | 0.471 (4) |
| C12' | 0.6541 (15) | 1.0805 (16) | -0.0905 (16)  | 0.073 (5)   | 0.471 (4) |
| H12' | 0.5824      | 1.0924      | -0.0794       | 0.088*      | 0.471 (4) |
| C13' | 0.7086 (15) | 1.154 (2)   | -0.1465 (17)  | 0.069 (4)   | 0.471 (4) |
| H13' | 0.6782      | 1.2174      | -0.1769       | 0.083*      | 0.471 (4) |
| C14' | 0.8128 (17) | 1.1090 (17) | -0.1434 (15)  | 0.054 (3)   | 0.471 (4) |
| H14' | 0.8623      | 1.1416      | -0.1744       | 0.065*      | 0.471 (4) |
| S1   | 0.6308 (4)  | 1.0925 (5)  | -0.1018 (4)   | 0.0707 (12) | 0.529 (4) |
| C12  | 0.8222 (10) | 1.0026 (18) | -0.0858 (12)  | 0.072 (5)   | 0.529 (4) |
| H12  | 0.8807      | 0.9517      | -0.0699       | 0.086*      | 0.529 (4) |
| C13  | 0.8325 (16) | 1.0987 (17) | -0.1432 (16)  | 0.062 (3)   | 0.529 (4) |
| H13  | 0.8942      | 1.1207      | -0.1664       | 0.074*      | 0.529 (4) |
| C14  | 0.7296 (12) | 1.1464 (19) | -0.1533 (15)  | 0.060 (3)   | 0.529 (4) |
| H14  | 0.7129      | 1.2089      | -0.1886       | 0.072*      | 0.529 (4) |
| C18  | 0.8130 (3)  | 0.7231 (3)  | 0.14620 (19)  | 0.0448 (8)  |           |
| S2   | 0.8058 (3)  | 0.5957 (2)  | 0.1929 (2)    | 0.0788 (10) | 0.633 (5) |
| C19  | 0.9074 (11) | 0.7381 (13) | 0.1097 (12)   | 0.065 (4)   | 0.633 (5) |
| H19  | 0.9267      | 0.8030      | 0.0827        | 0.078*      | 0.633 (5) |
| C20  | 0.9724 (10) | 0.6298 (8)  | 0.1220 (8)    | 0.067 (2)   | 0.633 (5) |
| H20  | 1.0377      | 0.6190      | 0.1001        | 0.081*      | 0.633 (5) |
| C21  | 0.9295 (7)  | 0.5468 (11) | 0.1679 (8)    | 0.077 (2)   | 0.633 (5) |
| H21  | 0.9619      | 0.4765      | 0.1826        | 0.093*      | 0.633 (5) |
| S2'  | 0.9240 (7)  | 0.7245 (7)  | 0.0999 (7)    | 0.084 (2)   | 0.367 (5) |
| C19' | 0.795 (2)   | 0.6208 (14) | 0.1853 (19)   | 0.110 (7)   | 0.367 (5) |
| H19' | 0.7358      | 0.6016      | 0.2126        | 0.132*      | 0.367 (5) |
| C20' | 0.8927 (18) | 0.549 (3)   | 0.1726 (18)   | 0.099 (5)   | 0.367 (5) |
| H20' | 0.9004      | 0.4766      | 0.1950        | 0.119*      | 0.367 (5) |
| C21' | 0.973 (2)   | 0.5911 (13) | 0.1276 (19)   | 0.099 (6)   | 0.367 (5) |

|      |            |            |              |            |           |
|------|------------|------------|--------------|------------|-----------|
| H21' | 1.0365     | 0.5553     | 0.1157       | 0.119*     | 0.367 (5) |
| O1   | 0.5657 (2) | 0.7135 (2) | 0.17142 (14) | 0.0627 (7) |           |
| O2   | 0.9203 (2) | 0.9858 (2) | 0.14861 (17) | 0.0692 (8) |           |
| O3   | 0.7748 (2) | 1.1019 (2) | 0.11081 (16) | 0.0622 (7) |           |

Atomic displacement parameters ( $\text{\AA}^2$ )

|      | $U^{11}$    | $U^{22}$    | $U^{33}$    | $U^{12}$     | $U^{13}$     | $U^{23}$     |
|------|-------------|-------------|-------------|--------------|--------------|--------------|
| C7   | 0.0478 (18) | 0.0444 (18) | 0.0371 (17) | -0.0016 (15) | 0.0082 (14)  | -0.0012 (14) |
| C6   | 0.0350 (16) | 0.0465 (18) | 0.0376 (17) | 0.0002 (14)  | 0.0087 (13)  | -0.0070 (14) |
| C5   | 0.0490 (19) | 0.057 (2)   | 0.051 (2)   | -0.0094 (17) | 0.0123 (15)  | -0.0075 (17) |
| C4   | 0.051 (2)   | 0.068 (2)   | 0.057 (2)   | -0.0145 (18) | 0.0020 (17)  | -0.017 (2)   |
| C3   | 0.055 (2)   | 0.073 (3)   | 0.042 (2)   | -0.0038 (19) | -0.0012 (16) | -0.0138 (18) |
| C2   | 0.0465 (19) | 0.059 (2)   | 0.0381 (18) | 0.0013 (16)  | 0.0059 (14)  | -0.0005 (16) |
| C1   | 0.0296 (14) | 0.0449 (18) | 0.0357 (16) | 0.0059 (13)  | 0.0041 (12)  | -0.0034 (14) |
| C10  | 0.0297 (14) | 0.0425 (17) | 0.0339 (16) | 0.0048 (13)  | 0.0068 (12)  | -0.0004 (13) |
| C9   | 0.0312 (15) | 0.0415 (17) | 0.0378 (17) | 0.0010 (13)  | 0.0064 (12)  | -0.0004 (13) |
| C8   | 0.0385 (16) | 0.0446 (18) | 0.0314 (16) | -0.0007 (14) | 0.0039 (13)  | -0.0026 (13) |
| C22  | 0.0428 (17) | 0.0499 (19) | 0.0357 (17) | -0.0068 (15) | 0.0100 (13)  | -0.0038 (14) |
| C23  | 0.0435 (18) | 0.060 (2)   | 0.0357 (18) | -0.0077 (16) | 0.0056 (14)  | -0.0080 (15) |
| C24  | 0.075 (3)   | 0.107 (4)   | 0.046 (2)   | -0.022 (3)   | 0.002 (2)    | -0.005 (2)   |
| C25  | 0.083 (3)   | 0.100 (4)   | 0.067 (3)   | -0.024 (3)   | 0.027 (3)    | -0.033 (3)   |
| C26  | 0.081 (3)   | 0.065 (3)   | 0.081 (3)   | -0.008 (2)   | 0.038 (3)    | -0.019 (2)   |
| C27  | 0.058 (2)   | 0.062 (2)   | 0.049 (2)   | 0.0018 (18)  | 0.0173 (17)  | -0.0053 (18) |
| C15  | 0.0444 (19) | 0.053 (2)   | 0.0371 (17) | -0.0041 (16) | 0.0067 (14)  | 0.0016 (15)  |
| C16  | 0.103 (3)   | 0.060 (3)   | 0.089 (3)   | -0.021 (2)   | -0.003 (3)   | -0.018 (2)   |
| C17  | 0.172 (6)   | 0.097 (4)   | 0.107 (4)   | -0.066 (4)   | 0.041 (4)    | -0.014 (3)   |
| C11  | 0.0369 (16) | 0.0462 (18) | 0.0383 (17) | 0.0006 (14)  | 0.0041 (13)  | 0.0021 (14)  |
| S1'  | 0.0550 (18) | 0.070 (2)   | 0.0428 (15) | -0.0058 (15) | 0.0164 (13)  | 0.0081 (13)  |
| C12' | 0.078 (10)  | 0.074 (9)   | 0.065 (8)   | -0.008 (7)   | 0.003 (7)    | 0.024 (6)    |
| C13' | 0.079 (8)   | 0.066 (7)   | 0.056 (6)   | -0.008 (6)   | -0.004 (6)   | 0.013 (6)    |
| C14' | 0.064 (7)   | 0.068 (6)   | 0.033 (5)   | -0.017 (5)   | 0.010 (5)    | 0.013 (5)    |
| S1   | 0.0577 (16) | 0.0709 (19) | 0.080 (3)   | 0.0160 (13)  | 0.0030 (15)  | 0.0266 (15)  |
| C12  | 0.068 (8)   | 0.065 (6)   | 0.079 (8)   | -0.004 (6)   | 0.003 (6)    | 0.011 (5)    |
| C13  | 0.053 (5)   | 0.065 (6)   | 0.065 (6)   | -0.002 (4)   | 0.006 (5)    | 0.004 (5)    |
| C14  | 0.050 (5)   | 0.064 (5)   | 0.063 (6)   | 0.005 (4)    | 0.002 (4)    | 0.016 (5)    |
| C18  | 0.050 (2)   | 0.048 (2)   | 0.0340 (17) | 0.0095 (16)  | 0.0014 (14)  | -0.0020 (15) |
| S2   | 0.103 (2)   | 0.0537 (14) | 0.0784 (15) | 0.0134 (14)  | 0.0120 (14)  | 0.0163 (12)  |
| C19  | 0.067 (6)   | 0.057 (5)   | 0.068 (6)   | 0.048 (4)    | 0.005 (5)    | -0.010 (4)   |
| C20  | 0.059 (4)   | 0.065 (5)   | 0.074 (5)   | 0.042 (4)    | 0.001 (3)    | -0.019 (4)   |
| C21  | 0.090 (6)   | 0.059 (5)   | 0.070 (5)   | 0.039 (5)    | -0.022 (5)   | -0.009 (4)   |

|      |             |             |             |              |              |              |
|------|-------------|-------------|-------------|--------------|--------------|--------------|
| S2'  | 0.064 (3)   | 0.084 (4)   | 0.108 (4)   | 0.010 (3)    | 0.029 (3)    | -0.027 (3)   |
| C19' | 0.113 (11)  | 0.090 (11)  | 0.126 (13)  | 0.074 (9)    | 0.018 (9)    | -0.014 (9)   |
| C20' | 0.105 (10)  | 0.074 (7)   | 0.113 (10)  | 0.073 (8)    | 0.006 (8)    | -0.008 (7)   |
| C21' | 0.101 (10)  | 0.084 (10)  | 0.107 (11)  | 0.061 (10)   | 0.005 (8)    | -0.020 (9)   |
| O1   | 0.0706 (16) | 0.0788 (18) | 0.0416 (14) | -0.0247 (14) | 0.0177 (12)  | 0.0002 (12)  |
| O2   | 0.0443 (14) | 0.0747 (18) | 0.0811 (18) | -0.0079 (13) | -0.0092 (13) | -0.0116 (14) |
| O3   | 0.0656 (16) | 0.0458 (14) | 0.0709 (17) | -0.0045 (12) | 0.0003 (13)  | -0.0055 (12) |

Geometric parameters (Å, °)

|         |           |           |            |
|---------|-----------|-----------|------------|
| C7—O1   | 1.212 (4) | C16—H16B  | 0.9700     |
| C7—C6   | 1.473 (4) | C17—H17A  | 0.9600     |
| C7—C8   | 1.544 (4) | C17—H17B  | 0.9600     |
| C6—C5   | 1.390 (4) | C17—H17C  | 0.9600     |
| C6—C1   | 1.397 (4) | C11—C12   | 1.371 (9)  |
| C5—C4   | 1.377 (5) | C11—C12'  | 1.385 (9)  |
| C5—H5   | 0.9300    | C11—S1'   | 1.686 (4)  |
| C4—C3   | 1.375 (5) | C11—S1    | 1.700 (4)  |
| C4—H4   | 0.9300    | S1'—C14'  | 1.698 (9)  |
| C3—C2   | 1.375 (5) | C12'—C13' | 1.487 (10) |
| C3—H3   | 0.9300    | C12'—H12' | 0.9300     |
| C2—C1   | 1.395 (4) | C13'—C14' | 1.365 (9)  |
| C2—H2   | 0.9300    | C13'—H13' | 0.9300     |
| C1—C10  | 1.476 (4) | C14'—H14' | 0.9300     |
| C10—C9  | 1.341 (4) | S1—C14    | 1.696 (8)  |
| C10—C11 | 1.476 (4) | C12—C13   | 1.481 (9)  |
| C9—C15  | 1.497 (4) | C12—H12   | 0.9300     |
| C9—C8   | 1.524 (4) | C13—C14   | 1.353 (8)  |
| C8—C18  | 1.523 (4) | C13—H13   | 0.9300     |
| C8—C22  | 1.536 (4) | C14—H14   | 0.9300     |
| C22—C27 | 1.395 (5) | C18—C19   | 1.387 (9)  |
| C22—C23 | 1.427 (4) | C18—C19'  | 1.397 (10) |
| C23—C24 | 1.368 (5) | C18—S2'   | 1.648 (6)  |
| C23—H23 | 0.9300    | C18—S2    | 1.690 (4)  |
| C24—C25 | 1.335 (6) | S2—C21    | 1.720 (7)  |
| C24—H24 | 0.9300    | C19—C20   | 1.496 (9)  |
| C25—C26 | 1.346 (6) | C19—H19   | 0.9300     |
| C25—H25 | 0.9300    | C20—C21   | 1.382 (8)  |
| C26—C27 | 1.361 (5) | C20—H20   | 0.9300     |
| C26—H26 | 0.9300    | C21—H21   | 0.9300     |
| C27—H27 | 0.9300    | S2'—C21'  | 1.713 (9)  |

|             |           |                |            |
|-------------|-----------|----------------|------------|
| C15—O2      | 1.192 (4) | C19'—C20'      | 1.500 (10) |
| C15—O3      | 1.328 (4) | C19'—H19'      | 0.9300     |
| C16—C17     | 1.437 (6) | C20'—C21'      | 1.397 (10) |
| C16—O3      | 1.459 (4) | C20'—H20'      | 0.9300     |
| C16—H16A    | 0.9700    | C21'—H21'      | 0.9300     |
| O1—C7—C6    | 122.3 (3) | H17A—C17—H17C  | 109.5      |
| O1—C7—C8    | 120.5 (3) | H17B—C17—H17C  | 109.5      |
| C6—C7—C8    | 117.1 (3) | C12—C11—C12'   | 107.7 (12) |
| C5—C6—C1    | 120.2 (3) | C12—C11—C10    | 126.8 (8)  |
| C5—C6—C7    | 119.2 (3) | C12'—C11—C10   | 125.4 (9)  |
| C1—C6—C7    | 120.6 (3) | C12—C11—S1'    | 7.3 (8)    |
| C4—C5—C6    | 120.4 (3) | C12'—C11—S1'   | 114.7 (8)  |
| C4—C5—H5    | 119.8     | C10—C11—S1'    | 119.7 (3)  |
| C6—C5—H5    | 119.8     | C12—C11—S1     | 110.1 (7)  |
| C3—C4—C5    | 119.5 (3) | C12'—C11—S1    | 4.7 (13)   |
| C3—C4—H4    | 120.2     | C10—C11—S1     | 123.1 (3)  |
| C5—C4—H4    | 120.2     | S1'—C11—S1     | 117.3 (3)  |
| C2—C3—C4    | 120.9 (3) | C11—S1'—C14'   | 88.4 (8)   |
| C2—C3—H3    | 119.5     | C11—C12'—C13'  | 112.1 (17) |
| C4—C3—H3    | 119.5     | C11—C12'—H12'  | 123.9      |
| C3—C2—C1    | 120.5 (3) | C13'—C12'—H12' | 123.9      |
| C3—C2—H2    | 119.7     | C14'—C13'—C12' | 105 (2)    |
| C1—C2—H2    | 119.7     | C14'—C13'—H13' | 127.6      |
| C2—C1—C6    | 118.4 (3) | C12'—C13'—H13' | 127.6      |
| C2—C1—C10   | 122.0 (3) | C13'—C14'—S1'  | 119.9 (16) |
| C6—C1—C10   | 119.5 (3) | C13'—C14'—H14' | 120.1      |
| C9—C10—C11  | 120.3 (3) | S1'—C14'—H14'  | 120.1      |
| C9—C10—C1   | 120.9 (3) | C14—S1—C11     | 90.1 (8)   |
| C11—C10—C1  | 118.7 (2) | C11—C12—C13    | 117.2 (15) |
| C10—C9—C15  | 121.2 (3) | C11—C12—H12    | 121.4      |
| C10—C9—C8   | 123.0 (3) | C13—C12—H12    | 121.4      |
| C15—C9—C8   | 115.7 (2) | C14—C13—C12    | 102.5 (18) |
| C18—C8—C9   | 109.6 (2) | C14—C13—H13    | 128.8      |
| C18—C8—C22  | 113.7 (2) | C12—C13—H13    | 128.8      |
| C9—C8—C22   | 109.8 (2) | C13—C14—S1     | 120.1 (16) |
| C18—C8—C7   | 102.9 (2) | C13—C14—H14    | 119.9      |
| C9—C8—C7    | 110.9 (2) | S1—C14—H14     | 120.0      |
| C22—C8—C7   | 109.8 (2) | C19—C18—C19'   | 120.6 (10) |
| C27—C22—C23 | 117.6 (3) | C19—C18—C8     | 122.0 (6)  |
| C27—C22—C8  | 118.1 (3) | C19'—C18—C8    | 117.3 (9)  |



|               |            |                    |             |
|---------------|------------|--------------------|-------------|
| C23—C22—C8    | 124.3 (3)  | C19—C18—S2'        | 6.9 (10)    |
| C24—C23—C22   | 117.8 (4)  | C19'—C18—S2'       | 114.8 (9)   |
| C24—C23—H23   | 121.1      | C8—C18—S2'         | 127.8 (4)   |
| C22—C23—H23   | 121.1      | C19—C18—S2         | 114.4 (6)   |
| C25—C24—C23   | 122.7 (4)  | C19'—C18—S2        | 6.4 (10)    |
| C25—C24—H24   | 118.6      | C8—C18—S2          | 123.5 (3)   |
| C23—C24—H24   | 118.6      | S2'—C18—S2         | 108.6 (4)   |
| C24—C25—C26   | 120.7 (4)  | C18—S2—C21         | 94.5 (5)    |
| C24—C25—H25   | 119.7      | C18—C19—C20        | 106.9 (10)  |
| C26—C25—H25   | 119.7      | C18—C19—H19        | 126.6       |
| C25—C26—C27   | 120.1 (4)  | C20—C19—H19        | 126.6       |
| C25—C26—H26   | 120.0      | C21—C20—C19        | 115.9 (11)  |
| C27—C26—H26   | 120.0      | C21—C20—H20        | 122.0       |
| C26—C27—C22   | 121.2 (4)  | C19—C20—H20        | 122.0       |
| C26—C27—H27   | 119.4      | C20—C21—S2         | 108.2 (10)  |
| C22—C27—H27   | 119.4      | C20—C21—H21        | 125.9       |
| O2—C15—O3     | 124.6 (3)  | S2—C21—H21         | 125.9       |
| O2—C15—C9     | 124.1 (3)  | C18—S2'—C21'       | 98.3 (11)   |
| O3—C15—C9     | 111.3 (3)  | C18—C19'—C20'      | 103.3 (18)  |
| C17—C16—O3    | 110.7 (4)  | C18—C19'—H19'      | 128.3       |
| C17—C16—H16A  | 109.5      | C20'—C19'—H19'     | 128.3       |
| O3—C16—H16A   | 109.5      | C21'—C20'—C19'     | 121 (2)     |
| C17—C16—H16B  | 109.5      | C21'—C20'—H20'     | 119.6       |
| O3—C16—H16B   | 109.5      | C19'—C20'—H20'     | 119.6       |
| H16A—C16—H16B | 108.1      | C20'—C21'—S2'      | 103 (2)     |
| C16—C17—H17A  | 109.5      | C20'—C21'—H21'     | 128.7       |
| C16—C17—H17B  | 109.5      | S2'—C21'—H21'      | 128.7       |
| H17A—C17—H17B | 109.5      | C15—O3—C16         | 117.2 (3)   |
| C16—C17—H17C  | 109.5      |                    |             |
| O1—C7—C6—C5   | -16.1 (5)  | C1—C10—C11—S1      | 69.7 (5)    |
| C8—C7—C6—C5   | 160.0 (3)  | C12—C11—S1'—C14'   | 13 (9)      |
| O1—C7—C6—C1   | 162.8 (3)  | C12'—C11—S1'—C14'  | -2.9 (18)   |
| C8—C7—C6—C1   | -21.1 (4)  | C10—C11—S1'—C14'   | -177.9 (10) |
| C1—C6—C5—C4   | 0.9 (5)    | S1—C11—S1'—C14'    | 1.5 (11)    |
| C7—C6—C5—C4   | 179.8 (3)  | C12—C11—C12'—C13'  | 1 (3)       |
| C6—C5—C4—C3   | -0.5 (5)   | C10—C11—C12'—C13'  | 177.9 (17)  |
| C5—C4—C3—C2   | -0.2 (6)   | S1'—C11—C12'—C13'  | 3 (3)       |
| C4—C3—C2—C1   | 0.4 (5)    | S1—C11—C12'—C13'   | -121 (16)   |
| C3—C2—C1—C6   | 0.0 (5)    | C11—C12'—C13'—C14' | -2 (3)      |
| C3—C2—C1—C10  | -178.5 (3) | C12'—C13'—C14'—S1' | 0 (3)       |

|                 |            |                   |             |
|-----------------|------------|-------------------|-------------|
| C5—C6—C1—C2     | -0.7 (4)   | C11—S1'—C14'—C13' | 2 (2)       |
| C7—C6—C1—C2     | -179.6 (3) | C12—C11—S1—C14    | -1.9 (16)   |
| C5—C6—C1—C10    | 177.8 (3)  | C12'—C11—S1—C14   | 58 (14)     |
| C7—C6—C1—C10    | -1.0 (4)   | C10—C11—S1—C14    | 178.9 (10)  |
| C2—C1—C10—C9    | -171.3 (3) | S1'—C11—S1—C14    | -0.4 (12)   |
| C6—C1—C10—C9    | 10.3 (4)   | C12'—C11—C12—C13  | -1 (3)      |
| C2—C1—C10—C11   | 7.2 (4)    | C10—C11—C12—C13   | -177.5 (17) |
| C6—C1—C10—C11   | -171.2 (3) | S1'—C11—C12—C13   | -166 (11)   |
| C11—C10—C9—C15  | 3.0 (4)    | S1—C11—C12—C13    | 3 (3)       |
| C1—C10—C9—C15   | -178.6 (3) | C11—C12—C13—C14   | -3 (3)      |
| C11—C10—C9—C8   | -174.3 (3) | C12—C13—C14—S1    | 2 (3)       |
| C1—C10—C9—C8    | 4.2 (4)    | C11—S1—C14—C13    | 0 (2)       |
| C10—C9—C8—C18   | 88.2 (3)   | C9—C8—C18—C19     | 15.8 (11)   |
| C15—C9—C8—C18   | -89.2 (3)  | C22—C8—C18—C19    | -107.5 (11) |
| C10—C9—C8—C22   | -146.3 (3) | C7—C8—C18—C19     | 133.8 (11)  |
| C15—C9—C8—C22   | 36.3 (3)   | C9—C8—C18—C19'    | -165.8 (16) |
| C10—C9—C8—C7    | -24.7 (4)  | C22—C8—C18—C19'   | 70.9 (16)   |
| C15—C9—C8—C7    | 157.9 (3)  | C7—C8—C18—C19'    | -47.8 (16)  |
| O1—C7—C8—C18    | 91.3 (3)   | C9—C8—C18—S2'     | 11.2 (6)    |
| C6—C7—C8—C18    | -84.9 (3)  | C22—C8—C18—S2'    | -112.1 (6)  |
| O1—C7—C8—C9     | -151.7 (3) | C7—C8—C18—S2'     | 129.2 (6)   |
| C6—C7—C8—C9     | 32.1 (4)   | C9—C8—C18—S2      | -167.7 (3)  |
| O1—C7—C8—C22    | -30.1 (4)  | C22—C8—C18—S2     | 69.1 (4)    |
| C6—C7—C8—C22    | 153.7 (3)  | C7—C8—C18—S2      | -49.7 (3)   |
| C18—C8—C22—C27  | 178.5 (3)  | C19—C18—S2—C21    | -0.4 (11)   |
| C9—C8—C22—C27   | 55.3 (4)   | C19'—C18—S2—C21   | 168 (14)    |
| C7—C8—C22—C27   | -66.9 (4)  | C8—C18—S2—C21     | -177.2 (5)  |
| C18—C8—C22—C23  | 0.1 (4)    | S2'—C18—S2—C21    | 3.8 (6)     |
| C9—C8—C22—C23   | -123.0 (3) | C19'—C18—C19—C20  | 0 (2)       |
| C7—C8—C22—C23   | 114.8 (3)  | C8—C18—C19—C20    | 178.7 (8)   |
| C27—C22—C23—C24 | -0.1 (5)   | S2'—C18—C19—C20   | -33 (9)     |
| C8—C22—C23—C24  | 178.2 (3)  | S2—C18—C19—C20    | 1.9 (16)    |
| C22—C23—C24—C25 | 0.3 (6)    | C18—C19—C20—C21   | -3.1 (19)   |
| C23—C24—C25—C26 | 0.2 (7)    | C19—C20—C21—S2    | 2.8 (15)    |
| C24—C25—C26—C27 | -0.9 (7)   | C18—S2—C21—C20    | -1.4 (9)    |
| C25—C26—C27—C22 | 1.1 (6)    | C19—C18—S2'—C21'  | 146 (10)    |
| C23—C22—C27—C26 | -0.6 (5)   | C19'—C18—S2'—C21' | -3 (2)      |
| C8—C22—C27—C26  | -179.0 (3) | C8—C18—S2'—C21'   | -179.9 (11) |
| C10—C9—C15—O2   | -119.3 (4) | S2—C18—S2'—C21'   | -0.9 (12)   |
| C8—C9—C15—O2    | 58.2 (4)   | C19—C18—C19'—C20' | -1 (3)      |
| C10—C9—C15—O3   | 62.5 (4)   | C8—C18—C19'—C20'  | -179.8 (15) |

|                 |             |                    |            |
|-----------------|-------------|--------------------|------------|
| C8—C9—C15—O3    | -120.1 (3)  | S2'—C18—C19'—C20'  | 3 (3)      |
| C9—C10—C11—C12  | 69.2 (13)   | S2—C18—C19'—C20'   | -14 (12)   |
| C1—C10—C11—C12  | -109.3 (12) | C18—C19'—C20'—C21' | -2 (4)     |
| C9—C10—C11—C12' | -106.8 (15) | C19'—C20'—C21'—S2' | 0 (4)      |
| C1—C10—C11—C12' | 74.7 (15)   | C18—S2'—C21'—C20'  | 1 (2)      |
| C9—C10—C11—S1'  | 67.6 (4)    | O2—C15—O3—C16      | 3.7 (5)    |
| C1—C10—C11—S1'  | -111.0 (4)  | C9—C15—O3—C16      | -178.1 (3) |
| C9—C10—C11—S1   | -111.7 (4)  | C17—C16—O3—C15     | 96.7 (5)   |

Absorption spectra of tri-substituted  $\alpha$ -naphthols **13i**, **13k**, **13l** and **13m**

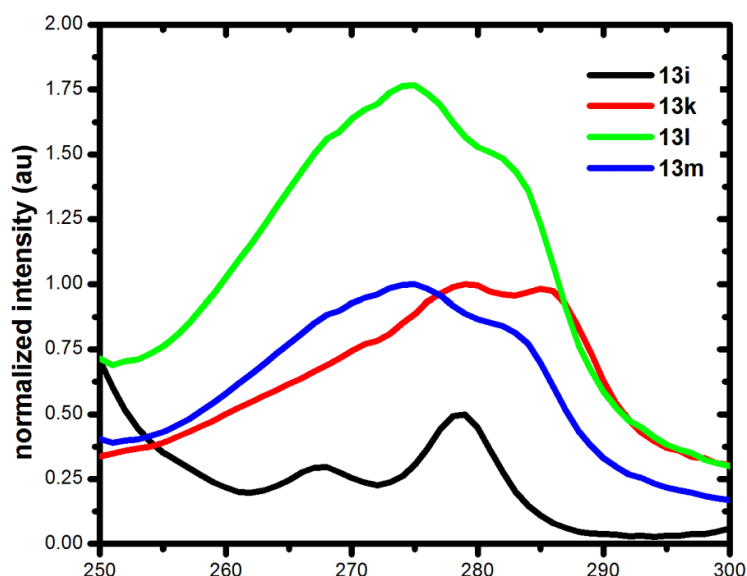

Emission spectra of tri-substituted  $\alpha$ -naphthols **13i**, **13k**, **13l** and **13m**

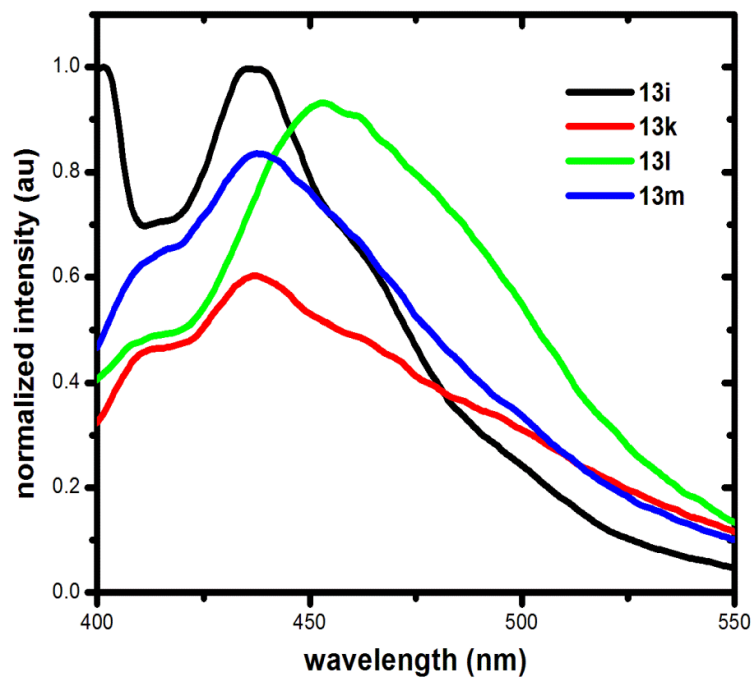

Supplement: c6ob00628k1.pdf [file c6ob00628k1.pdf]
